## Nuclear DNA amounts in angiosperms: targets, trends and tomorrow

M. D. Bennett\* and I. J. Leitch

Jodrell Laboratory, Royal Botanic Gardens, Kew, Richmond, Surrey TW9 3AB, UK

\* For correspondence. E-mail: [i.leitch@kew.org](mailto:i.leitch@kew.org)

Received: 25 August 2010 Returned for revision: 18 October 2010 Accepted: 24 November 2010 Published electronically: 21 January 2011

### CONTENTS

|                                                                                          |     |
|------------------------------------------------------------------------------------------|-----|
| INTRODUCTION                                                                             | 468 |
| <i>Extending the range of genome sizes encountered in angiosperms</i>                    | 469 |
| <i>The need for reference lists</i>                                                      | 470 |
| TARGETS IN GENOME SIZE RESEARCH                                                          | 470 |
| <i>Meeting targets for species representation</i>                                        | 470 |
| <i>Progress towards targets for familial representation</i>                              | 471 |
| <i>Improved systematic representation for genera</i>                                     | 472 |
| <i>Improved representation of other groups</i>                                           | 472 |
| TRENDS IN TECHNIQUES USED TO ESTIMATE GENOME SIZE                                        | 473 |
| <i>The rise in flow cytometry as the technique of choice for genome size estimations</i> | 473 |
| <i>Development of different isolation buffers for flow cytometry</i>                     | 473 |
| <i>The application of flow cytometry to plant systematics</i>                            | 474 |
| <i>Recent developments in the application of flow cytometry to genome size studies</i>   | 474 |
| (i) <i>The use of seeds</i>                                                              | 474 |
| (ii) <i>Ease of access to methodological data</i>                                        | 474 |
| (iii) <i>New equipment</i>                                                               | 474 |
| <i>Are there any new techniques for estimating genome size on the horizon?</i>           | 475 |
| (i) <i>Can real time PCR be used for estimating plant genome sizes?</i>                  | 475 |
| (ii) <i>Will 'complete' genome sequencing give useable genome size estimates?</i>        | 475 |
| TOMORROW                                                                                 | 479 |
| <i>Uncovering and collating genome size data from diverse published sources</i>          | 480 |
| <i>Screening ex situ and in situ collections as sources of target taxa</i>               | 481 |
| DEDICATION                                                                               | 481 |
| LITERATURE CITED                                                                         | 482 |
| APPENDIX                                                                                 | 485 |
| <i>Notes to the Appendix</i>                                                             | 485 |
| <i>Original references for DNA values</i>                                                | 587 |

• **Background and Aims** The amount of DNA in an unreplicated gametic chromosome complement is known as the C-value and is a key biodiversity character of fundamental significance with many practical and predictive uses. Since 1976, Bennett and colleagues have assembled eight compilations of angiosperm C-values for reference purposes and subsequently these have been pooled into the Angiosperm DNA C-values Database (<http://data.kew.org/cvalues/>). Since the last compilation was published in 2005, a large amount of data on angiosperm genome size has been published. It is therefore timely to bring these data together into a ninth compilation of DNA amounts.

• **Scope** The present work lists DNA C-values for 2221 species from 151 original sources (including first values for 1860 species not listed in previous compilations). Combining these data with those published previously shows that C-values are now available for 6287 angiosperm species.

• **Key Findings** Analysis of the dataset, which is by far the largest of the nine compilations published since 1976, shows that angiosperm C-values are now being generated at the highest rate since the first genome sizes were estimated in the 1950s. The compilation includes new record holders for the smallest ( $1C = 0.0648$  pg in *Genlisea margaretae*) and largest ( $1C = 152.23$  pg in *Paris japonica*) genome sizes so far reported, extending the range encountered in angiosperms to nearly 2400-fold. A review of progress in meeting targets set at the Plant Genome Size meetings shows that although representation for genera, geographical regions and some plant life forms (e.g. island floras and parasitic plants) has improved, progress to increase familial representation is still slow. In terms of technique it is now clear that flow cytometry is soon likely to become the only method available for plant genome size estimations. Fortunately, this has been accompanied by numerous careful studies to improve the quality of data generated using this technique (e.g. design of new buffers, increased awareness and understanding of problems caused by cytosolic inhibitors). It is also clear that although the speed of DNA sequencing continues to rise dramatically with the advent of next-generation and third-generation sequencing technologies, 'complete genome sequencing' projects are still unable to generate accurate plant genome size estimates.

**Key words:** DNA C-value, nuclear genome size, Plant DNA C-values Database, flow cytometry.

## INTRODUCTION

It has been possible to estimate the amount of DNA in plant and animal nuclei using various methods for over 60 years. Following the discovery of the key role of DNA in biology in 1953 (Watson and Crick, 1953) such research has increased in each successive decade, and this trend has further intensified in the 21st century. These decades saw the loss of many who played key roles in founding and developing this interest [including Hewson Swift (1920–2004), John McLeish (1929–1971), Arnold Sparrow (1914–1976) and Hugh Rees (1923–2009)]. Yet until now the remarkable birth and explosion of genome size data in ‘the DNA age’ occurred in the scientific lifetime of some individuals who witnessed or experienced the entire development of this field. However, the death of Jim Price (1944–2005 – Arnold Sparrow’s postdoctoral student) in 2004, and the retirement of the first author (Mike Bennett – Hugh Rees’s postdoctoral student) in 2006 and Johann Greilhuber in 2010 shows that an historic change has begun as the baton passes to generations unborn at the start of the DNA age, whose knowledge of early genome size research reflects written accounts alone, with no further recourse to supplementary first-hand sources. Happily, recent trends noted in this review show that tomorrow’s studies of nuclear DNA amounts in angiosperms rest with an enthusiastic new cohort of practitioners focused on carefully improving techniques and data representation to better understand the origin, extent and effects of variation in plant genome size.

As noted by Bennett and Leitch (2005a), ‘Nuclear DNA amount and genome size (C-value) are important biodiversity characters, whose study provides a strong unifying element in biology with practical and predictive uses’. Of all the major taxonomic groups studied, Bennett and Leitch (2005a) noted that angiosperms were probably the most intensively studied. With published prime C-values for over 6280 species now available (Table 1), they remain so today. Indeed, work on plants has played a leading part in the research on the DNA

amount in the unreplicated gametic nuclear chromosome complement [defined by Swift (1950) as the 1C-value] of different taxa. [Recently this was defined as the holoploid genome size by Greilhuber *et al.* (2005).]

Easy access to data for these key characters is clearly an important facility. Yet in practice it has often been difficult to know whether a C-value exists for a particular taxon, and if so, where to find it, especially as estimates are widely scattered in the literature or even unpublished. Although small lists of nuclear DNA amounts were published in reviews and research papers as genome size data started to accumulate in the 1960s and 1970s, the first large compilation of DNA amounts for angiosperms, compiled primarily as a reference source, was published in 1976 with data for 753 species from 54 sources (Bennett and Smith, 1976). This noted an intention to publish supplementary compilations for reference purposes at intervals and seven followed (see Table 1).

Increasing accessibility and ease of access to nuclear DNA amounts was made possible through pooling of data in the published reference compilations into one electronic database available on the internet. The Angiosperm DNA C-values Database (release 1), which collated all the data from the first five published compilations (Table 1), went live in April 1997. After several updates, a major new release (3.1) of angiosperm data was combined with databases for gymnosperms, pteridophytes and bryophytes, into the Plant DNA C-values Database (release 1.0) in 2001. This database was further expanded in 2004 (release 3.0) to incorporate not only first values for 628 species not previously listed in the Angiosperm DNA C-values Database, but also, for the first time, DNA amounts for 253 algal species. An additional update of the Plant DNA C-values Database (release 4.0), adding data for over 300 angiosperm species (from Zonneveld *et al.*, 2005), went live in 2005. Release 5.0 of the Plant DNA C-values Database (December 2010)

TABLE 1. Total numbers of first estimates for angiosperm species and of original references from which they come in nine compilations of nuclear genome size estimates collated for reference purposes since 1976

| Original compilation              | No. of first estimates for ‘species’ in abstract of compilation | No. of prime estimates for species in the Plant DNA C-values Database (release 5.0) | No. of original references in compilation | No. of first estimates per original reference (column 2/4) |
|-----------------------------------|-----------------------------------------------------------------|-------------------------------------------------------------------------------------|-------------------------------------------|------------------------------------------------------------|
| 1. Bennett and Smith (1976)       | 753                                                             | 596 <sup>†</sup>                                                                    | 54                                        | 13.9                                                       |
| 2. Bennett <i>et al.</i> (1982)   | 240                                                             | 195 <sup>†</sup>                                                                    | 53                                        | 4.5                                                        |
| 3. Bennett and Smith (1991)       | 588                                                             | 552 <sup>†</sup>                                                                    | 56                                        | 10.5                                                       |
| 4. Bennett and Leitch (1995)      | 899                                                             | 868 <sup>†</sup>                                                                    | 106                                       | 8.5                                                        |
| 5. Bennett and Leitch (1997)      | 471                                                             | 481 <sup>†</sup>                                                                    | 37                                        | 12.7                                                       |
| 6. Bennett <i>et al.</i> (2000)   | 691                                                             | 686 <sup>†</sup>                                                                    | 71                                        | 9.7                                                        |
| 7. Bennett and Leitch (2005a)     | 628                                                             | 636 <sup>†</sup>                                                                    | 88                                        | 7.7                                                        |
| 8. Zonneveld <i>et al.</i> (2005) | 308                                                             | 308                                                                                 | 1                                         | 308.0                                                      |
| 9. Present work                   | 1860                                                            | 1974 <sup>†</sup>                                                                   | 151                                       | 13.1                                                       |
| Total                             | 6438*                                                           | 6287*                                                                               | 617                                       | –                                                          |

\* The total number of taxa in the Plant DNA C-values Database (i.e. 6287) is lower by 151 than the total for paper compilations (i.e. total = 6438) because several types of entry included in the latter are omitted from the former. These include: 87 DNA per cell values, 35 genus sp. values where other values for named species in the same genus are included, and 29 values for some varieties of species where values for other varieties of the same species are included.

<sup>†</sup> The number of prime estimates for species in the Plant DNA C-values Database (release 5.0) (Bennett and Leitch, 2010) may differ from the number of first estimates for species listed in the abstract of paper compilations (column 2) owing to the reallocation of prime status from the first estimate published for a taxon to an estimate published later.

incorporates all the data presented in the Appendix here, and brings the total number of angiosperms with C-value data available in the database to 6287 (<http://data.kew.org/cvalues/>, Bennett and Leitch, 2010). The database is in a format which can be queried through a variety of search options, thus enabling users to analyse, sort and filter the data, while at the end of each query, the number of records returned together with their summary statistics (i.e. minimum, maximum, mean and standard deviation) are given. In addition taxonomic (i.e. family, higher group, voucher status), cytological (i.e. ploidy level, chromosome number), technical (i.e. method used to estimate genome size) and bibliographic information can be displayed where such data are available.

Compiling the reference lists and, more recently, the electronic databases has clearly been of value, given the scope and range of uses made of them by the science community. An indication of their value can be gleaned from noting that the published compendia listing angiosperm C-values have been cited over 2100 times and over 85 citations for just the seventh compilation (Bennett and Leitch, 2005a). In addition, the electronic databases have been cited over 230 times and the total number of hits on the Plant DNA C-values Database is now well over 250 000 (most of which are enquiries for angiosperms).

Particular uses of DNA C-values for individual taxa have been reviewed previously (Bennett *et al.*, 2000; Bennett and Leitch, 2005a; Leitch and Bennett, 2007). Together, these resources have clearly continued to provide large samples of data essential for many diverse comparative studies. Recent examples of large surveys include studies of the relationship between genome size and B-chromosomes (Levin *et al.*, 2005), duration of cell cycle (Francis *et al.*, 2008), seed size and mass (Beaulieu *et al.*, 2007b), photosynthetic rate (Beaulieu *et al.*, 2007a), plant growth form and distribution (Ohri, 2005), leaf cell size and stomatal density (Beaulieu *et al.*, 2008; Hodgson *et al.*, 2010), and patterns of genome size evolution (Leitch *et al.*, 2005, 2009, 2010; Beaulieu *et al.*, 2010).

Variation in genome size has interesting relationships with characters at many levels ranging from the nucleus and cell to tissues and whole organisms (Bennett, 1987; Bennett and Leitch, 2005c), and recent work continues to confirm this. For example, relationships between genome size and a range of nuclear characters have been detected in surveys using the Plant DNA C-values Database since 2003. Houben *et al.* (2003) showed that the extent of methylation of histone H3 in euchromatin of plant chromosomes depends on basic nuclear DNA content. Prokopowich *et al.* (2003) found a positive correlation between rDNA copy number and genome size in eukaryotes (Gregory, 2005), whilst Ross-Ibarra (2007) found that genome size is significantly correlated with recombination rate, with changes in genome size explaining a meaningful proportion (approx. 20%) of variation in this character. In contrast, Barow and Meister (2003) reported that genome size had only a minor, albeit significant, effect on endopolyploidization in seed plants (Barow and Jovtchev, 2007), with other factors such as phylogeny and life strategy having a stronger impact. Similarly, a large-scale analysis of a phylogenetically diverse sample of species failed to find a strong significant

relationship between genome size and pollen size (Knight *et al.*, 2010).

Given their ongoing uses as reference sources, the publication of a further supplementary compilation of angiosperm C-values is needed, and indeed, it is overdue. Whereas the first three compilations were published in journals of the Royal Society (London), the five later ones, from 1995 onwards, have all been published in *Annals of Botany*, a decision based, in part, on its wider availability to intended users, especially those in institutions in the USA. *Annals of Botany* (AoB) has played a major role in plant genome size research through its sponsorship of discussion meetings and workshops on plant genomes [at the Royal Botanic Gardens, Kew (RBG, Kew) in 1997, 2003 and 2007, and at the XVII International Botanical Congress held in Vienna, Austria, in 2005]. These led to the publication of three special issues ‘Genome size in Plants’ (December 1998), ‘Plant Genome Size’ (January 2005) and ‘Plant Genome Horizons – Vistas and Visions’ (April 2008). Partly as a consequence of these developments, AoB has played a growing role as a vehicle for research papers on plant genome size and has rapidly become the journal of choice for first publication of significant work. Indeed, Bennett and Leitch (2005a) noted that the highest proportion of papers containing C-values were published in AoB – a role maintained until now. Thus, 17% (15 of the 88) of the original sources cited in Bennett and Leitch (2005a) were originally published in AoB, which is similar to 16% (24 of 151) of the original sources cited in the present compendium. It is also worth noting that in both cases the proportion of first estimates for species (26.7 and 34.7%, respectively) published in AoB was much higher than the proportion of original sources.

Over the years, the citation impact factor for AoB has risen from 1.127 in 1995 to 3.501 in 2010 and plant genome size papers have contributed strongly to this increase. For example, compilations published in 1995–2000 together have received over 600 citations, while two papers, one on terminology (Greilhuber, 2005) and the other on technique (Doležel and Bartos, 2005), each with over 100 citations, were both among the five most cited papers in AoB published in 2005. Clearly AoB is an important platform to showcase plant genome size research and reference data, and practitioners would be wise to maintain a critical mass of such work to benefit their field into the future.

#### *Extending the range of genome sizes encountered in angiosperms*

The minimum and maximum DNA C-values listed in 1972 for *Arabidopsis thaliana* and *Fritillaria assyriaca*, respectively (Bennett, 1972), remained unchanged for over 30 years, although the number of species listed increased more than 15-fold from 273 (Bennett, 1972) to more than 4100 (Plant DNA C-values Database, release 4.0 October 2005). Lower values were claimed for several taxa (including *A. thaliana*), but most of these were discounted or withdrawn later, mainly on technical grounds (Bennett and Leitch, 2005a). For example, the very low value for *Cardamine amara* of  $1C = 0.051$  pg reported by S. R. Band in 1984 as a personal communication to the first author has subsequently been shown to be an underestimate. Three independent

measurements using flow cytometry obtained a value of  $1C = 0.24$  pg (Bennett and Leitch, 2005b).

Nevertheless, data listed in the present work have recently extended the range of values for angiosperms at both ends of the scale. At the lower end, Greilhuber *et al.* (2006) reported convincing C-values much lower than for *A. thaliana* for several Lentibulariaceae species, including  $1C = 0.09$  pg for *Utricularia gibba*, 0.065 pg for *Genlisea aurea* and a new record minimum angiosperm C-value estimate of 0.0648 pg for *Genlisea margaretae*. This drop in the minimum known C-value was not small, but constituted a remarkable 60 % reduction to well under half the value for *A. thaliana* (0.16 pg). Indeed, Bennett and Leitch (2005a) previously discussed what was the lowest C-value for a free-living angiosperm and suggested that the theoretical minimum monoploid genome size ( $1Cx$  value) may approach 0.05 pg for a true diploid. The results for *Genlisea* (Greilhuber *et al.*, 2006) confirm this prediction, and should provide a practical rationale and spur for new surveys to see if other taxa have yet lower C-values and approach the suggested theoretical minimum even more closely.

At the other end of the scale, the maximum angiosperm C-value has also increased recently. Zonneveld (2010) reported a  $1C$ -value of 132.5 pg for a hexaploid hybrid *Trillium × hageae* ( $2n = 6x = 30$ ; Melanthiaceae), just less than the reported maximum genome size for an animal (133 pg in the marbled lungfish *Protopterus aethiopicus*, Pedersen, 1971). Yet even this has been exceeded in the genus *Paris* (also Melanthiaceae) in which a  $1C$ -value of 152.23 pg for the octoploid *Paris japonica* ( $2n = 8x = 40$ ) was recently estimated by Pellicer *et al.* (2010). This value is 15 % larger than all previous plant genome size estimates and extends the range encountered in angiosperms to nearly 2400-fold.

Such studies illustrate again that we do not yet know the full ranges of basic genome parameters (cf. Bennett, 1998) and confirm the continued need for new surveys of plant DNA C-values, chromosome numbers and ploidy levels to establish their full ranges experimentally.

#### The need for reference lists

As the data gathered in this compendium have been entered into the Plant DNA C-values Database, it might be asked if publishing them in this form has added value to their electronic listing. Indeed it does, and at various levels ranging from individual values to overviews and reviews of the metadata. For example, given only the numbers published it is puzzling why Schmuths *et al.* (2004) obtained a  $1Cx$  value of 0.206 pg for *A. thaliana* ‘Columbia’, which was 26 % higher than the value of 0.163 pg for the same species measured using the completely sequenced genome of *Caenorhabditis elegans* as the calibration standard (Bennett *et al.*, 2003). However, this seems clear given the extra information in footnote ‘ac’ (for original reference number 494). This shows that Schmuths *et al.* (2004) chose *Raphanus sativus* as the internal calibration standard using a  $2C$ -value of 1.38 pg, which they reported had been taken from Doležel *et al.* (1998), rather than the  $2C$ -value estimate for *Raphanus sativus* ‘Saxa’ of 1.11 pg given by Doležel *et al.* (1992) – a difference of +

24.3 %. [Actually, Doležel *et al.* (1998) reported a mean  $2C$ -value of 1.22 and 1.26 pg for *Raphanus sativus* depending on which species was used as the primary standard.] Had Schmuths *et al.* (2004) used the value of 1.11 pg their estimate for *A. thaliana* ‘Columbia’ would have been 0.166 pg, and within 2 % of the prime C-value estimate for *A. thaliana* ‘Columbia’ of 0.163 pg (Bennett *et al.*, 2003). The electronic database lacks such detailed comments but it cites the compendium review to which reference can be made to check if useful extra information is available and analysis provided.

The example above concerns one taxon. However, compendia reviews also provide opportunities to publish results of useful wider comparisons to identify trends, or test perceptions (and correct misconceptions). For example, the compendium papers give overviews of trends in the latest sample of estimates and papers, and report on progress towards reaching milestones and targets in gap filling and in the take up of guidance regarding best practice issued by the GENOME SIZE Initiative (GESI – Bennett and Leitch, 2005b) by the plant genome size community (<http://data.kew.org/cvalues/pgsm/#9%20Key%20recommendations>). In the past, none of these was routinely included with updates or new releases of the electronic database, but instead may be mentioned there, citing a compendium as the reference for full details. Unlike the Plant DNA C-values Database, compendia also often draw attention to some of the novel and key uses to which DNA C-value metadata have been put, and review the results and conclusions of such studies. Having the collected new data together with such analyses and reviews is a valuable resource providing overviews in the broadest possible context.

However, given the retirement of the first author and the need to update the Plant DNA C-values Database on a more regular basis than in the past, future releases of new data will be uploaded with or without publication of any compendium paper such as this. Thus, the database will continue to be updated and made available on the internet through the website of the RBG, Kew, who are committed to maintaining and managing this important biodiversity resource for the genome size community.

#### TARGETS IN GENOME SIZE RESEARCH

The present work marks several major milestones in plant genome size research which concern both quantitative and qualitative aspects of the DNA C-value data. The compendium lists DNA C-value estimates for 2221 angiosperm species taken from 151 original references (including first values for 1860 species from 132 sources). Thus, it is by far the largest number of new and novel species’ values, and the largest number of new sources, published together, among the nine compendia published since 1976 (see Table 1). So how do the new data contribute to the targets set for plant genome size research?

#### Meeting targets for species representation

Previous compilations have tracked the annual output of DNA C-value estimates and shown a strong rising trend in the number of total and first estimates since 1960 (Bennett and Leitch, 2005a). Updating this analysis to include values

published here (comprising data included in compilations 1–8 and the present Appendix – see Table 1) shows that these trends were strongly maintained. Thus, the mean total number of C-values for angiosperm species per year rose 69 % from 311 in 2000–2004 to 527 in 2005–2008, whilst the mean total number of first values for angiosperm species rose 72 % from 219 in 2000–2004 to 378 in 2005–2008 (Fig. 1). Clearly, encouraging progress towards increasing the representation of angiosperm species with genome size data continues to be made. Indeed the slope of the graph in Fig. 1 shows that the last 3-year period (2005–2008) had the highest rate of genome size data generation for any period analysed since the first plant genome size was estimated in 1950. It is therefore timely to review and assess how far progress has been made towards meeting targets set for increasing species representation for angiosperms.

Bennett and Smith (1976) listed C-values for 753 angiosperm species, and it was not until 1995 that data for 2500 species were available. It was then conservatively estimated that the total number of angiosperm species was about 250 000, thus C-value data were already available for 1 % of species. At the 1997 Angiosperm Genome Size Workshop, with C-values for 2802 species compiled into the Angiosperm DNA C-values Database, a target was set to measure a further 1 % of species (i.e. approx. 2500 species) by 2003. Analysis shows that this target was aspirational, as a review at the Plant Genome Size meeting held in 2003 showed that C-values for only a further 1032 species had been collated, corresponding to just 41 % of the target, although knowledge of further data as yet unpublished and/or collated suggested that approx. 66 % of the target may have been met (Bennett and Leitch, 2005a). Nevertheless, the 2003 meeting reset the target to measure a further 2500 species in the next quinquennium (i.e. 2003–2008) and

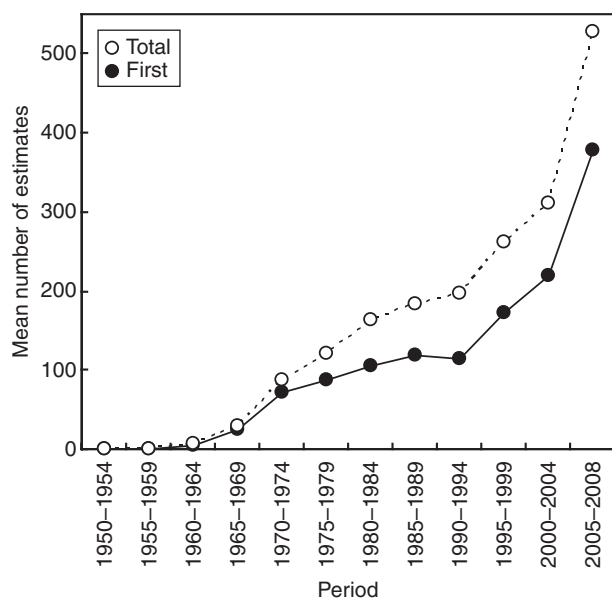

FIG. 1. Mean number per year of total and 'first' DNA C-value estimates communicated in 11 successive 5-year periods and the 4-year period 2005–2008, between 1950 and 2008. Data taken from the Plant DNA C-values Database (release 5.0, December 2010).

analysis shows better progress as the addition of C-values for a further 2155 species compiled over this time frame shows that 86 % of the target was met.

However, recently the total number of angiosperm species has been revised upward to a widely accepted 352 000 (Paton *et al.*, 2008). Using this higher value, the percentage of species with C-values still stands at only 1.8%. Nevertheless, if present rates of data acquisition are maintained, the sample of species for which C-values are listed should reach 2 % (i.e. 7040) and 3 % (i.e. 10 560) of the higher number within about 3 and 12 years, respectively.

Clearly the setting of targets has been invaluable for focusing and improving the representation of species with C-values. It therefore seems reasonable to maintain a target of first C-values for angiosperm species at 2500 for the next 5 years. If rates of data acquisition continue at the same rate then such a goal seems reasonable, but attaining 10 % species representation (i.e. approx. 35 200, the ultimate goal which seemed sensible to Bennett and Leitch, 2005a) would still be estimated to take 60–80 years.

#### Progress towards targets for familial representation

In 1997, C-values were still unavailable for 68 % of angiosperm families recognized by the first Angiosperm Phylogeny Group (APG) classification published in 1998 (APG, 1998). Thus, at the first Angiosperm Genome Size workshop (1997) a goal was set to complete familial representation by 2002. This proved over-optimistic. Progress was initially very slow, as only 12 (1.7 %) of the 691 species' values in the fifth DNA compilation (Bennett *et al.*, 2000) were also first values for families. Nevertheless, new work focused to address the shortfall produced first C-values for over 80 unrepresented families by 2003 (e.g. Hanson *et al.*, 2001a, b, 2003; Leitch and Hanson, 2002). This increased familial representation to 47.5 % (Bennett and Leitch, 2005a), based on C-value data for 217 families out of the 457 families recognized in the revised angiosperm phylogeny (APG II, 2003) (Fig. 2). As this still fell well short of the original target, it was revised down at the Plant Genome Size Meeting held in 2003 to a new goal of 75 % familial representation. Based on the number of families recognized by APG II (2003), this would require the measurement of an additional 114 families.

Analysis of the 1860 first C-values for species listed in the current Appendix shows that only 24 (0.13 %) are also first estimates for families, representing just 21 % of the target of 114 families. Combining these with data in the Plant DNA C-values Database shows that in total there are currently 240 angiosperm families with genome size data. Given that a further revision by the APG (APG III, 2009) now recognizes only 415 families (10 % down on the number recognized in APG II), the current familial representation now stands at 58 %, so progress towards achieving even the reduced target set of 75 % familial representation in the last quinquennium (i.e. 2003–2008) has remained poor. Major factors limiting progress have been discussed previously (Hanson *et al.*, 2003) as has the expectation that such difficulties will intensify as familial representation approaches 100 %. Nevertheless, progress since 2003 has been disappointing in relation to the size and distribution of the shortfall and has again depended

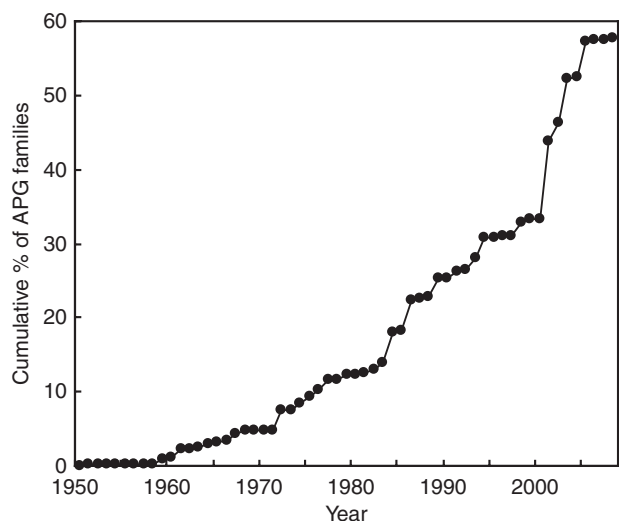

FIG. 2. Cumulative percentage of angiosperm families recognized by the Angiosperm Phylogeny Group (APG) (APG III, 2009) with a first C-value represented in the present Plant DNA C-values Database (release 5.0, December 2010).

mainly on work by just one institution – RBG, Kew [i.e. RBG, Kew, estimated 65 of the 74 (87%) first values for families added in 1997–2002, and 18 of the 25 (75%) first values for families added in the present Appendix]. Bennett and Leitch (2005a) previously noted that ‘... international collaboration to locate materials and estimate genome sizes for still unsampled families will be essential if the long term goals of 75% and then complete familial representation are to be achieved’. Such progress will require champions to focus on this target, collaboration to share the load more broadly and funds for collecting exceptional and esoteric material of the approx. 70 or 175 families still needed for 75 or 100% familial representation, respectively.

#### Improved systematic representation for genera

Within the key recommendations for angiosperms set at the Plant Genome Size meeting in 2003 (<http://data.kew.org/cvalues/pgsm/#9%20Key%20recommendations>) was a target of achieving 10% generic representation. Although targets for species and familial representation have been set and tracked since 1997, none was set for genera prior to 2003, so 2003–2008 is the first quinquennium for which this target has been monitored. The reason for adding this new level was to reflect developments in the field of angiosperm phylogenetics based on molecular studies. By 2003 the APG had transformed the view of higher order angiosperm phylogeny, bringing new certainty and stability at the familial level and replacing several different conflicting non-molecular systems. Consequently, the focus of new molecular-based work was shifted to the generic level.

Analysis of the 4119 species listed by 2003 showed DNA C-values for 1042 genera, out of the then approx. 14 000 genera recognized (M. Chase, Royal Botanic Garden, Kew, London, pers. comm.), equivalent to approx. 7.4% representation overall. Thus, it was calculated that achieving 10%

representation would require a first C-value for an additional approx. 400 genera and so this target was set. Subsequently, the total number of genera was revised down to 12 962 (Mabberley, 2008), which would make achieving 10% representation easier, requiring a first C-value for only approx. 250 genera. Analysis of the data in the Appendix shows it contains C-values for 554 genera of which 329 (59.4%) are first C-values for a genus. Overall the 6287 species with genome size data include 1444 genera, an increase of 402 genera since 2003. Thus, work in the last 5 years has made considerable progress towards meeting the generic target, increasing representation to 11.2%. Indeed, progress towards this target was outstanding, greatly exceeding that at both specific and familial levels noted above. Given the current focus on genera it seems reasonable to keep a similar target of first C-values for a further 450–500 genera over the next 5 years, to enable representation to approach approx. 15%.

#### Improved representation of other groups

Although the Plant Genome Size Workshops have noted other gaps in general discussions, they have not set any targets to fill them, choosing to focus first on improved systematic representation in angiosperms, and on widening representation of other plant groups, such as gymnosperms, pteridophytes (i.e. monilophytes and lycophytes), bryophytes and algae. Nevertheless, previous papers in this series have identified particular major gaps in our knowledge of angiosperm C-values (e.g. Bennett and Leitch, 1995, 2005a), which merit research (but without recommending targets and time frames). Clearly this was influential as many of these gaps have subsequently received significant attention. For example, Bennett and Leitch (1995) noted that ‘estimates were rare for many types of angiosperms such as: palms, parasitic plants, noxious weeds and succulents’. Studies soon addressed some, but not all, of these groups listing first C-values for 74 palms (Röser *et al.*, 1997) and 39 weeds (Bennett *et al.*, 1998).

Although some progress had been made, Bennett and Leitch (2005a) noted several ongoing gaps in geographical and plant life form, including ‘island floras rich in endemics’ and ‘taxa from bog, fen, tundra, alpine and desert environments, and halophytic, insectivorous, parasitic, saprophytic and epiphytic species and their associated taxa’. Examining the 151 original references contributing to the Appendix shows they include significant contributions to filling some of the above gaps. Several provide data for island floras. Murray *et al.* (2003, 2005) give genome sizes for 158 endemic and indigenous grasses of New Zealand, whilst Suda *et al.* (2003, 2005) list values for species representing 40% of the Macaronesian angiosperms. Data for 13 Oncidiinae orchids (Chase *et al.*, 2005) and 18 *Cuscuta* vines (McNeal *et al.*, 2007) have usefully increased representation for epiphytes. The latter, together with estimates for approx. 40 taxa of holoparasitic *Orobanch*e (Weiss-Schneeweiss *et al.*, 2005) and for several taxa in two genera of Cistaceae (*Halimium* and *Xolantha*; Boscaiu *et al.*, 2008) have also significantly improved representation for parasitic plants with first values for approx. 70 species. Finally, estimates for four Adriatic seagrasses (Dolenc Koce *et al.*, 2003) and 13 marine halophytes

(Dolenc Koce *et al.*, 2008) have made a positive start in direct response to address a gap identified in Bennett and Leitch (2005a).

### TRENDS IN TECHNIQUES USED TO ESTIMATE GENOME SIZE

#### *The rise in flow cytometry as the technique of choice for genome size estimations*

A continued interest in genome size research has focused on the techniques used to obtain such data. Previous analyses have shown a trend towards the increasing use of flow cytometry since 1983 (Galbraith *et al.*, 1983) to reach 58.4% of first estimates listed in the seventh compilation (i.e. Bennett and Leitch, 2005a). Updating this analysis shows a further strong rise in the use of flow cytometry in recent years, with Feulgen microscopy methods continuing to fall (Fig. 3A). Indeed, of the 1860 first estimates listed in the present Appendix, 84.5% were made using flow cytometry but only 15.4% used Feulgen microscopy methods. Dividing the latter into traditional Feulgen microdensitometry and computer-based image analysis (CIA) of Feulgen-stained preparations (Fig. 3B) shows that although the use of CIA generally rose between 2000 and 2006, more recently its use has declined (contributing just 31 C-value estimates in 2007 and 2008, Fig. 3B) along with that of the more traditional Feulgen microdensitometry methods. This trend is not unexpected but reflects the final loss of traditional photomicrodensitometers and the failure to develop a 'standard inexpensive CIA kit, an agreed best practice CIA technique and easy access to leading laboratories for training and technology transfer', conditions which Bennett and Leitch (2005a) suggested would be essential for CIA to become the realistic alternative to flow cytometry for estimating C-values. Indeed, CIA has advantages for some materials in providing cytological sights and insights into the material being studied (such as chromosome number, aneuploidy, B-chromosomes and nuclear stability) unavailable to users of flow cytometry without also making separate cytological preparations. Clearly, the use of Feulgen microscopy with CIA has not been favoured by most practitioners in the plant genome size community.

Analysis of data in the Animal Genome Size Database (Gregory, 2006) shows a different picture. Here, 1151 estimates were made using CIA for the period 1991–2009 (compared with 190 in plants). Nevertheless, of the 29 original sources giving such data, 13 (which list data for 549 taxa) were published by T. R. Gregory, so (as with many other aspects of genome size research) this trend has been strongly influenced by the output of just one productive practitioner and his colleagues. In plants, all recent estimates made using CIA were co-authored by Vilhar in Slovenia or come from the University of Vienna where Greilhuber and colleagues use the CIRES system, which is now unavailable to purchase. In view of the above, the use of CIA to estimate plant genome sizes is unlikely to increase again unless manufacturers supply and support complete and inexpensive CIA packages which compete with the options provided by flow cytometry makers. This now seems unlikely given the small size of the genome size market, but could still occur as a marginal use

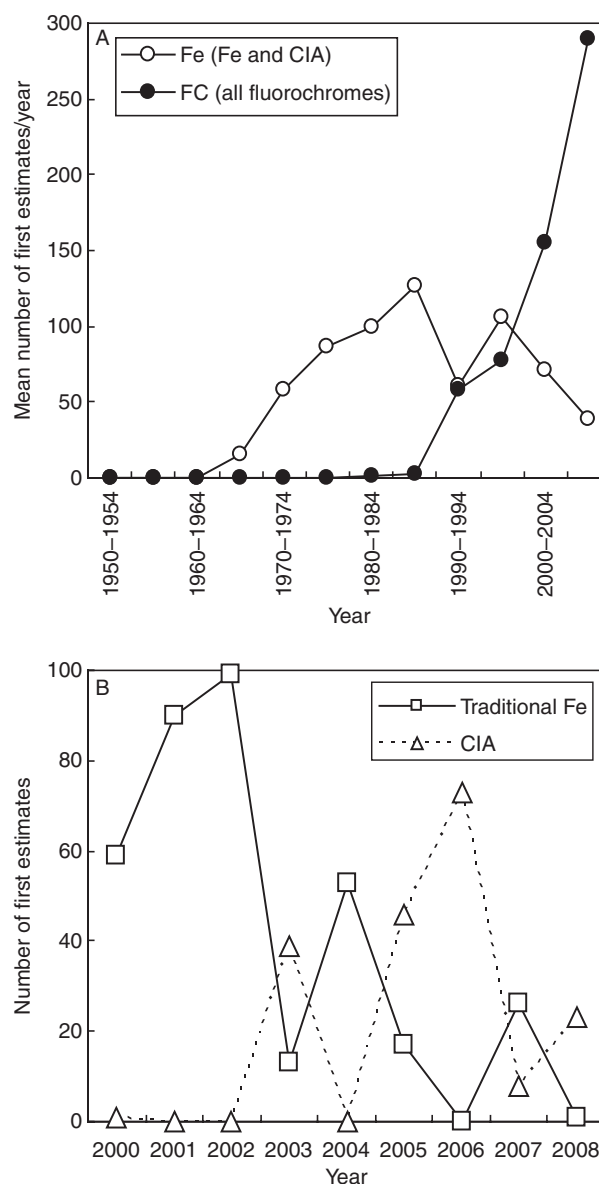

FIG. 3. (A) Mean number per year of 'first' DNA C-value estimates made using Feulgen microdensitometry (Fe) and flow cytometry (FC) communicated in 11 successive 5-year periods and the 4-year period 2005–2008, between 1950 and 2008. (B) Number of first estimates made using traditional Feulgen methods (Traditional Fe) and Feulgen staining measured using computer-aided image analysis (CIA) since 2000. Data taken from the Plant DNA C-values Database (release 5.0, December 2010).

of some equipment made for a different prime use in a larger (e.g. medical) market.

#### *Development of different isolation buffers for flow cytometry*

Since 1983, flow cytometry has been increasingly used as a method to estimate genome size (Galbraith *et al.*, 1983), and the composition and number of different types of isolation buffers has grown considerably, reflecting the complex diversity of biochemistry in plant cells. Indeed, in the FLOWER database for plant flow cytometry (Loureiro *et al.*, 2007b,

2008) there are 28 different buffers which have been used based on 826 research articles included in the database.

Recently, the performances of four of the most commonly used flow cytometry buffers (Galbraith's, LB01, Otto's and Tris.MgCl<sub>2</sub>) on seven plant species were compared by Loureiro *et al.* (2006a). By analysing various parameters of the flow histogram including forward scatter, side scatter and relative fluorescence intensity of propidium iodide-stained nuclei, the performance of each buffer was assessed. They concluded that no single buffer worked well for all species. Instead, the optimal buffer for a particular species depended on a number of factors, although Otto's and LB01 buffers were considered to be the best for the majority of species analysed. Subsequently, Loureiro and colleagues have developed two new buffers, a general-purpose buffer and one specifically developed for use with woody material (Loureiro *et al.*, 2007a).

Two recent studies have extended our understanding on how cytosolic compounds, which are released into the isolation buffer during nuclei isolation, can interfere with fluorochrome staining and lead to erroneous results and pseudo-genome size plasticity (Loureiro *et al.*, 2006b; Bennett *et al.*, 2008). Bennett *et al.* investigated the effects of anthocyanin, while Loureiro *et al.* examined tannic acid. Both groups of compounds, which are widespread across angiosperms, were shown to have potent effects on DNA staining leading to stoichiometric errors. Such studies emphasize the need to use internal standardization and the importance of testing for inhibitory compounds as recommended by Doležal (1991) and as more recently discussed in detail by Greilhuber *et al.* (2007).

#### *The application of flow cytometry to plant systematics*

With the ability of flow cytometry to analyse large numbers of individuals within and between populations, genome size data are now increasingly being used to help resolve taxonomic issues. These have included examples where genome size has been used to provide new insights into species relationships (e.g. *Agapanthus*, Zonneveld and Duncan, 2003; *Galanthus*, Zonneveld *et al.*, 2003; *Nerine*, Zonneveld and Duncan, 2006; *Curcuma*, Leong-Škornicková *et al.*, 2007; *Hieracium*, Suda *et al.*, 2007; *Narcissus*, Zonneveld, 2008) as well as for recognizing new taxonomic entities (e.g. *Cochlearia borzaeana*, Kochjarová *et al.*, 2006; *Pandanus fascicularis*, Panda *et al.*, 2009), supporting existing ones (e.g. *Lilium bosniacum*, Muratovic *et al.*, 2005) or rejecting them (e.g. *Lamium endtmannii*, Rosenbaumová *et al.*, 2004).

Genome size has also been used as a reliable guide in the separation of closely related species and their hybrid such as shown in studies of *Elytrigia repens*, *E. intermedia* and their hybrid (Mahelka *et al.*, 2005) (original reference 593 in the Appendix). Mahelka *et al.* (2005) analysed 238 individuals from 55 different populations and found that there was so little intraspecific variation in DNA amount for each of the two species and the hybrid that genome size could be used as a reliable taxonomic indicator. Indeed, genome size was shown to be more robust and less subjective than morphological characters that varied more or less continuously between the species and hybrid.

#### *Recent developments in the application of flow cytometry to genome size studies*

(i) *The use of seeds.* Recent reports suggest that dry seeds may be suitable material for genome size estimations made using flow cytometry (Sliwinska *et al.*, 2005, 2009; Jedrzejczyk and Sliwinska, 2010). This approach, if shown to be widely applicable, has several advantages: (1) it enables the direct analysis of seed stored in seed banks (provided the owners of the genetic resources approve), (2) it overcomes the problems associated with analysing fresh material collected in the field within a reasonable time frame before material has degraded, and (3) it provides an alternative source of tissue for analysis if the accumulation of staining inhibitors in other tissues has been shown to be problematic. Indeed, dry seed may contain a lower level of cytosolic inhibitors than other parts of the plant and hence may be easier to analyse (Greilhuber *et al.*, 2007). However, there is the potential that the seeds are intra- or inter-specific hybrids rather than representing the genomic make-up of the parent. In addition, using whole seeds for genome size studies means that all the material is destroyed, thereby preventing further genomic analysis (chromosome counts etc.). An alternative approach is to germinate the collected seed and analyse the growing plant material. In a large survey of the Macronesian flora by Suda *et al.* (2005) such an approach was taken. Seeds for over 100 taxa were collected from the Canary Islands during fieldwork and then brought back to the Czech Republic for germination and subsequent flow cytometric and cytological analysis.

(ii) *Ease of access to methodological data.* The launch of the FLOWer database (Loureiro *et al.*, 2007b, 2008) in 2007 has provided a valuable resource enabling users of flow cytometry to access and assess details of the protocols used by other practitioners to assist them in choosing the most likely method for analysing the plant species of interest.

(iii) *New equipment.* Another development which may assist in extending the ease of genome size analysis includes the launch of a new type of flow cytometer, the Accuri C6, by Accuri Cytometers in December 2006 ([www.AccuriCytometers.com](http://www.AccuriCytometers.com)). The company promised a revolution in flow cytometry with 'reliable, high performance fluidics, inexpensive, robust optics, and sophisticated and simplified electronics' – all for approx. £30 000. One of the main differences between such a machine and conventional flow cytometers such as those of Partec, Beckman Coulter or Beckton Dickinson is the greater dynamic range of operation (as it uses a 24-bit analog-to-digital converter for signal processing), enabling species with widely different genome sizes to be analysed together in a single sample. Indeed, tests on the machine carried out by Galbraith (2009) have demonstrated that species with 1C-values ranging from 0.16 to 40 pg can be visualized and analysed on the same flow histogram. Galbraith demonstrated that the machine had the potential to measure genome sizes in species with C-values ranging from 0.032 to 185 pg and hence was unlikely to be limited by this character. Galbraith concluded that 'for routine analysis of plant nuclear DNA contents, ploidy or investigations of other issues requiring C-value



determinations, the Accuri C6 flow cytometer provides an excellent platform'. He also suggested that given the reproducibility and simplicity of use it might now be feasible to realistically consider estimating genome sizes in the remaining 98 % of angiosperm species (Galbraith, 2009). Nevertheless, although Galbraith considered that it might be possible to estimate genome sizes in 12 species per hour, in reality he also recognized that potential problems arising from the need to optimize buffers and test for secondary products would inevitably slow things down. In addition, the need to make chromosome counts will further impede output – a factor often omitted by flow cytometer practitioners when extolling the greater speed of flow cytometry compared with Feulgen microscopy. Nevertheless, the availability of such a compact, inexpensive, yet easy to use machine is likely to make an impact in the field of genome size research as older, more traditional flow cytometers are replaced and updated.

*Are there any new techniques for estimating genome size on the horizon?*

Since the 1950s, nuclear DNA amounts have been estimated by at least eight different techniques, including: chemical extraction, Feulgen microdensitometry, flow cytometry, CIA, reassociation kinetics, pulse field gel electrophoresis and 'complete' genome sequencing. From an analysis of all the genome size data in the Plant DNA C-values Database and as noted above, just two (Feulgen microdensitometry and flow cytometry) have contributed over 96 % of first estimates for angiosperm species and it seems clear that flow cytometry will remain the dominant method of choice for estimating DNA C-values in plants in the near future. Indeed, it may become almost the sole method unless CIA or some new method takes off. So are there any realistic alternatives on the horizon?

(i) *Can real-time PCR be used for estimating plant genome sizes?* In 2003, a molecular-based method to estimate genome size was published which used the quantitative real-time polymerase chain reaction (qPCR) (Wilhelm *et al.*, 2003). The method required (1) a cloned single copy gene from the species of

interest and (2) an accurate method to estimate concentration of genomic DNA. qPCR was then performed and genome size calculated by dividing the amount of DNA present in the sample by the number of copies of the single copy gene detected. The method has since been used to estimate genome sizes in several eukaryotic species with genomes up to 2900 Mb. However, comparisons with estimates made using other methods have not always produced similar results (Table 2) and reasons for the discrepancies remain unclear. Recent modifications to the technique may overcome some of the initial problems identified (e.g. Jeyaprakash and Hoy, 2009), but given that (1) considerable time is required to optimize conditions for qPCR and (2) prior molecular knowledge is needed to identify suitable, specific primers for amplifying a unique sequence, whether the method is widely applicable remains unknown even for species with small genomes. Moreover, there are as yet no data to demonstrate how accurate the method is for genomes larger than 3000 Mb.

Indeed, the general suitability of the method for angiosperms remains unclear as there are no reports of plant genome size estimations using qPCR. Nevertheless, given (1) the propensity of plant genomes to undergo both localized and whole genome duplications and (2) the need to empirically select a suitable single copy gene and develop appropriate primers for each species investigated, it seems unlikely the method will be widely used. It is too time consuming and expensive even if it can be shown to work across the spectrum of genome sizes encountered in plants.

(ii) *Will 'complete' genome sequencing give useable genome size estimates?* It is now 10 years since the first complete genome sequence for an angiosperm was published (Arabidopsis Genome Initiative, 2000), and to date similar data for a further eight angiosperm species has followed (Table 3). It is therefore timely to assess the actual contribution that complete genome sequencing has made to our knowledge of plant DNA C-values, and to ask if this molecular approach has yielded more accurate genome size measurements than were previously available, and thereby provided the new 'gold standard' calibration standards against which other species can be compared. Bennett and Leitch (2005a) discussed

TABLE 2. Comparison of genome sizes estimated by quantitative real-time PCR (qRT-PCR) with other methods for various eukaryotic species (PFGE, pulse field gel electrophoresis; FC, flow cytometry; Fe, Feulgen microdensitometry; RK, reassociation kinetics; Ch, chemical determination).

| Species                                    | Group  | 1C value estimated using qRT PCR       | Reference                       | Range of 1C values estimated by other methods*                     |
|--------------------------------------------|--------|----------------------------------------|---------------------------------|--------------------------------------------------------------------|
| <i>Saccharomyces cerevisiae</i> (yeast)    | Fungus | 12.1 Mb                                | Wilhelm <i>et al.</i> (2003)    | 12.06–12.2 Mb (complete genome sequencing) <sup>1</sup>            |
| <i>Piriformospora indica</i>               | Fungus | 15.6–24 Mb<br>(depending on gene used) | Zuccaro <i>et al.</i> (2009)    | 15.7 Mb (PFGE) <sup>2</sup>                                        |
| <i>Thalassiosira pseudonana</i>            | Diatom | 35.9 Mb                                | von Dassow <i>et al.</i> (2008) | 31.3 Mb (complete genome sequencing) <sup>3</sup>                  |
| <i>Musca domestica</i> (house fly)         | Insect | 295 Mb                                 | Gao and Scott (2006)            | 950 Mb (spectrophotometry) <sup>4</sup> , 900 Mb (FC) <sup>5</sup> |
| <i>Drosophila melanogaster</i> (fruit fly) | Insect | 184 Mb                                 | Gao and Scott (2006)            | 157–206 Mb (FC) <sup>4</sup>                                       |
| <i>Xiphophorus maculatus</i> (platyfish)   | Fish   | 550 Mb                                 | Wilhelm <i>et al.</i> (2003)    | 410–550 Mb (Fe, RK) <sup>6</sup> , 760–990 Mb (FC) <sup>4</sup>    |
| <i>Homo sapiens</i> (human)                | Mammal | 2900 Mb                                | Wilhelm <i>et al.</i> (2003)    | 2940 Mb (Ch) <sup>7</sup> to 3355 Mb (Ch) <sup>8</sup>             |

\* <sup>1</sup>Fungal Genome Size Database (Kullman *et al.*, 2005); <sup>2</sup>Zuccaro *et al.* (2009); <sup>3</sup>Armbrust *et al.* (2004); <sup>4</sup>Animal Genome Size Database (Gregory, 2006); <sup>5</sup>J. S. Johnston (Texas A&M University, pers. comm., 2008); <sup>6</sup>Wilhelm *et al.* (2003); <sup>7</sup>Vendrelly and Vendrelly (1948); <sup>8</sup>Mandel *et al.* (1950).

TABLE 3. Comparison between the amount of DNA sequenced and total genome size in ‘complete’ plant genome sequencing projects

| Species <sup>‡</sup>                                                                                      | Total genome size reported by the ‘complete’ genome sequencing project (1C-value in Mbp) | Actual amount of assembled sequence generated by the ‘complete’ genome sequencing project (Mbp) | Percentage of genome estimated to have been sequenced (column 3/ column 2)                           | 1C-value estimated by other methods                                                                           | Comments                                                                                                                                                                                                                                                                                                                                                                                                                                                                                                                                                                                                                                                                                                                                                                                                                            |
|-----------------------------------------------------------------------------------------------------------|------------------------------------------------------------------------------------------|-------------------------------------------------------------------------------------------------|------------------------------------------------------------------------------------------------------|---------------------------------------------------------------------------------------------------------------|-------------------------------------------------------------------------------------------------------------------------------------------------------------------------------------------------------------------------------------------------------------------------------------------------------------------------------------------------------------------------------------------------------------------------------------------------------------------------------------------------------------------------------------------------------------------------------------------------------------------------------------------------------------------------------------------------------------------------------------------------------------------------------------------------------------------------------------|
| <i>Arabidopsis thaliana</i> ‘Columbia’ <sup>1</sup><br>(Arabidopsis)<br>Family Brassicaceae               | 125 <sup>†</sup>                                                                         | 115.4                                                                                           | 92 % assuming a 1C-value of 125 Mb but actually only 73.5 % if the higher 1C-value of 157 Mb is used | 157 Mb using FC:PI and <i>Caenorhabditis elegans</i> as standard (1C = 100 Mb) (Bennett <i>et al.</i> , 2003) | A 1C-value of 125 Mb given by the Arabidopsis Genome Initiative was based on adding 115.4 Mb of assembled sequence to an estimate of 10 Mb for the unsequenced centromeres and ribosomal DNA regions (Arabidopsis Genome Initiative, 2000).                                                                                                                                                                                                                                                                                                                                                                                                                                                                                                                                                                                         |
| <i>Oryza sativa</i> subsp. <i>indica</i> ‘93-11’ <sup>2</sup><br>(Rice)<br>Family Poaceae                 | 466 <sup>†</sup>                                                                         | 362                                                                                             | 77.6 %                                                                                               | 510 Mb using Fe and <i>Vigna radiata</i> (1C = 0.53 pg) (Bennett and Smith, 1991)                             | Yu <i>et al.</i> (2002) estimated that the repetitive sequences which were difficult to align accounted for 104 Mb of DNA. When added to the total amount of aligned sequence data this gave an estimated genome size of 466 Mb as stated in column 2.                                                                                                                                                                                                                                                                                                                                                                                                                                                                                                                                                                              |
| <i>Oryza sativa</i> subsp. <i>japonica</i> ‘Nipponbare’ <sup>3</sup><br>(Rice)                            | 420*                                                                                     | 389.8                                                                                           | n/a                                                                                                  | 510 Mb using Fe and <i>Vigna radiata</i> (1C = 0.53 pg) (Bennett and Smith, 1991)                             | No attempt was made to estimate a total genome size. Instead, a 1C-value of 420 Mbp was listed by Goff <i>et al.</i> (2002 – Syngenta group) although the source of this value, and hence how it was determined, was not stated.                                                                                                                                                                                                                                                                                                                                                                                                                                                                                                                                                                                                    |
| <i>Oryza sativa</i> subsp. <i>japonica</i> ‘Nipponbare’ <sup>4</sup><br>(Rice)                            | 389 <sup>†</sup>                                                                         | 370                                                                                             | 95 %                                                                                                 | 510 Mb using Fe and <i>Vigna radiata</i> (1C = 0.53 pg) (Bennett and Smith, 1991)                             | This work built on that of Syngenta (see above, Goff <i>et al.</i> , 2002) to produce a higher quality sequence estimated to comprise 95 % of the whole genome, including all the euchromatic regions. The 1C-value of 389 Mbp was based on adding the estimated length of 62 gaps (= 18.1 Mb), which included nine centromeres and 17 telomeres to the total length of aligned sequence (= 370 Mb).                                                                                                                                                                                                                                                                                                                                                                                                                                |
| <i>Populus trichocarpa</i> genotype ‘Nisqually 1’ <sup>5</sup><br>(black cottonwood)<br>Family Salicaceae | 485 <sup>†</sup> ± 10                                                                    | 410                                                                                             | 85 % of total genome but approx. 90 % of euchromatic region                                          | 686 Mb using FC:DAPI and chicken red blood cells as standard (1C = 1.21 pg) (Bradshaw and Stettler, 1993)     | The authors considered that the 410 Mb of assembled sequence data represented the euchromatic portion of the genome. The total genome size was based on adding this to 75 Mb of genomic sequence that could not be assembled into any of the major scaffolds. The authors suggested this was consistent with cytogenetic evidence showing approx. 30 % of the genome was heterochromatic. This was based on DAPI staining of seven prophase and metaphase cells followed by physical measurements of heterochromatic bands (NB: adjustments were made for the differential contraction of heterochromatin versus euchromatin).                                                                                                                                                                                                      |
| <i>Vitis vinifera</i> genotype PN40024 <sup>6</sup><br>(grapevine)<br>Family Vitaceae                     | 475*                                                                                     | 487                                                                                             | See comments                                                                                         | 415 Mb using FC:PI and chicken red blood cells as standard (Lodhi and Reisch, 1995)                           | No attempt was made to estimate a total genome size. Instead, the 1C-value of 475 Mb given by the French-Italian Public Consortium for Grapevine Genome Characterization (2007) was taken from Lodhi and Reisch (1995). Actually, this figure comes from the abstract of Lodhi and Reisch who stated that ‘the <i>Vitis</i> genome size is 475 Mb’ based on measurements for 19 species including <i>V. vinifera</i> . The measurements of Lodhi and Reisch were made using flow cytometry and chicken red blood cells as standard (assuming 2C = 2.33 pg) and showed there was intraspecific variation between different varieties of <i>Vitis vinifera</i> ranging from 1C = 415 to 511 Mb. The cultivar ‘Pinot Noir’, which is closest to the variety used for genome sequencing, was estimated to have a genome size of 415 Mb. |

|                                                                                                                              |                  |       |      |                                                                                              |                                                                                                                                                                                                                                                                                                                                                                                                                                                                                                                                                                                                                                                                                                                                                                                                                                                                                                                                                                                                                                                                                                                                                                                                  |
|------------------------------------------------------------------------------------------------------------------------------|------------------|-------|------|----------------------------------------------------------------------------------------------|--------------------------------------------------------------------------------------------------------------------------------------------------------------------------------------------------------------------------------------------------------------------------------------------------------------------------------------------------------------------------------------------------------------------------------------------------------------------------------------------------------------------------------------------------------------------------------------------------------------------------------------------------------------------------------------------------------------------------------------------------------------------------------------------------------------------------------------------------------------------------------------------------------------------------------------------------------------------------------------------------------------------------------------------------------------------------------------------------------------------------------------------------------------------------------------------------|
| <i>Carica papaya</i><br>'SunUp' <sup>7</sup><br>(Papaya)<br>Family Caricaceae                                                | 372*             | 271   | 73 % | 392 Mb using Fe and <i>Vigna radiata</i> (1C = 0.53 pg, Bennett and Smith, 1991)             | The additional 12 Mb of DNA in their assembled sequence of 487 Mbp compared with their reported genome size of 475 Mb was considered to represent 'remaining heterozygosity'.<br><br>No attempt was made to estimate a total genome size. Instead, the genome size was taken from Arumuganathan and Earle (1991a) who estimated the 1C value to be 372 Mb by FC:PI using chicken red blood cells as standard (2C = 2.33 pg) and a conversion factor of 1 pg = 965 Mb. Ming <i>et al.</i> (2008) noted that papaya chromosomes contained 'highly condensed heterochromatic regions which could represent 30 – 35 % of the genome DNA' and that 'a large proportion of the heterochromatic DNA was probably not covered by the whole genome sequence. They therefore concluded that the 271 Mbp of assembled sequence represented only about 75 % of the genome but more than 90 % of the euchromatic regions.                                                                                                                                                                                                                                                                                     |
| <i>Cucumis sativus</i> var. <i>sativa</i> 'Chinese long' inbred line 9930 <sup>8</sup><br>(cucumber)<br>Family Cucurbitaceae | 367*             | 243.5 | 66 % | 504 Mb using FC:PI and <i>Raphanus sativus</i> (1C = 0.69 pg) (Barow and Meister, 2003)      | No attempt was made to estimate a total genome size. Instead the value used by Huang <i>et al.</i> (2009) to estimate the percentage of genome sequenced was taken from Arumuganathan and Earle (1991a) made using FC with chicken red blood cells as standard (2C = 2.33 pg) and a conversion factor of 1 pg = 965 Mb). Huang <i>et al.</i> (2009) assumed that the difference between the amount of aligned sequence data (i.e. 243.5 Mb) and the genome size estimate of Arumuganathan and Earle (1991a) comprised heterochromatic satellite or rRNA sequences that were to be found in the remaining 30 % of unassembled sequence data.<br>NB: <i>Cucumis sativa</i> is the first plant to have its genome sequenced using a hybrid approach combining Sanger sequencing with Illumina GA sequencing (= next-generation sequencing). This involved the construction of a reference genome (with a 3.9-fold coverage) to take advantage of the long reads and clone length of the traditional Sanger technique. The high-throughput Illumina technology, which generated short reads approx. 50 bp long, was then used to give high sequencing depth (68.3-fold coverage) with low unit cost. |
| <i>Sorghum bicolor</i><br>genotype BTx623 <sup>9</sup><br>(sorghum)<br>Family Poaceae                                        | 730 <sup>†</sup> | 697.6 | 96 % | 818 Mb using FC:PI and <i>Arabidopsis thaliana</i> (1C = 157 Mb, Price <i>et al.</i> , 2005) | The source of the assumed total genome size of 730 Mb cited by Paterson <i>et al.</i> (2009) in their introduction is unclear although it probably represents the sum of the assembled sequence data (697.6 Mb) and the unassembled sequence scaffolds, which were estimated to comprise 34.94 Mb and considered to be located in the centromeric regions (see suppl. info. to Paterson <i>et al.</i> , 2009).                                                                                                                                                                                                                                                                                                                                                                                                                                                                                                                                                                                                                                                                                                                                                                                   |
| <i>Zea mays</i> line B73 <sup>10</sup><br>(maize)<br>Family Poaceae                                                          | 2300*            | 2048  | 89 % | 2646 Mb using Fe and <i>Hordeum vulgare</i> (1C = 5.56 pg, Bennett and Smith, 1991)          | Schnable <i>et al.</i> (2009) estimated that approx. 10.8 % of the maize genome was missing from assembled sequence data based on the genome size of maize taken from Rayburn <i>et al.</i> (1993), which was made using FC:DAPI (NB: the fluorochrome DAPI is no longer recommended for genome size estimations because it preferentially binds to AT-rich regions of the genome leading to inaccurate data, Doležel <i>et al.</i> , 2007). Of the approx. 250 Mb of 'missing' DNA, 60                                                                                                                                                                                                                                                                                                                                                                                                                                                                                                                                                                                                                                                                                                          |

Continued

TABLE 3. (continued, the superscript letters refer to notes preceding this table)

| Species <sup>‡</sup>                                                                        | Total genome size reported by the 'complete' genome sequencing project (1C-value in Mbp) | Actual amount of assembled sequence generated by the 'complete' genome sequencing project (Mbp) | Percentage of genome estimated to have been sequenced (column 3/ column 2) | 1C-value estimated by other methods                                  | Comments                                                                                                                                                                                                                                                                                                                                                                                                                                                                                                                                                                                                                                                                                                                                                                                                                                                                                                                                                                                                                                                                                                                                                                                      |
|---------------------------------------------------------------------------------------------|------------------------------------------------------------------------------------------|-------------------------------------------------------------------------------------------------|----------------------------------------------------------------------------|----------------------------------------------------------------------|-----------------------------------------------------------------------------------------------------------------------------------------------------------------------------------------------------------------------------------------------------------------------------------------------------------------------------------------------------------------------------------------------------------------------------------------------------------------------------------------------------------------------------------------------------------------------------------------------------------------------------------------------------------------------------------------------------------------------------------------------------------------------------------------------------------------------------------------------------------------------------------------------------------------------------------------------------------------------------------------------------------------------------------------------------------------------------------------------------------------------------------------------------------------------------------------------|
| <i>Brachypodium distachyon</i> inbred line Bd21 <sup>11</sup> (brachypodium) Family Poaceae | 272 <sup>†</sup>                                                                         | 270                                                                                             | 99.6 % (see comments)                                                      | 343 Mb using FC:PI and rice (1C = 490 Mb, Bennett and Leitch, 2005a) | Mb was considered to comprise tandem repeats (e.g. knob 180 bp repeats and CentC repeat).<br>The International <i>Brachypodium</i> Initiative (2010) used a whole genome shotgun strategy to sequence the genome of <i>B. distachyon</i> . They were able to align 270.1 Mb of sequenced nucleotides to create five chromosome scale pseudomolecules. They also estimated that gaps corresponded to approx. 1.1 Mb to give a genome size of 272 Mb. Interestingly, they noted that the total genome size fell within the range measured by FC, citing Bennett and Leitch (2005a) and Vogel <i>et al.</i> (2006). However, Bennett and Leitch (2005a) actually reported a 1C-value of 343 Mb using rice as a standard with a 2C DNA amount of 1.01 pg while Vogel <i>et al.</i> (2006) measured the same inbred line used for sequencing and reported 1C = 431 Mb using chicken red blood cells (2C = 2.33 pg) as the standard. It is thus unclear how the genome size of 272 Mb falls within these values. Furthermore, this calls into question the statement given by the International <i>Brachypodium</i> Initiative that the sequence generated corresponds to a 'near-complete genome'! |

FC:PI, flow cytometry using propidium iodide; FC:DAPI, flow cytometry using DAPI; Fe, Feulgen microdensitometry.

\* Total genome size taken from the literature where known (for source of data see 'Comments' column).

† Total genome size estimated from the sequencing data generated (see 'Comments' for how it was derived).

‡ <sup>1</sup>Arabidopsis Genome Initiative. 2000. Analysis of the genome sequence of the flowering plant *Arabidopsis thaliana*. *Nature* 408: 796–815. <sup>2</sup>Yu J, Hu SN, Wang J, *et al.* 2002. A draft sequence of the rice genome (*Oryza sativa* L. ssp. *indica*). *Science* 296: 79–92. <sup>3</sup>Goff SA, Ricke D, Lan TH, *et al.* 2002. A draft sequence of the rice genome (*Oryza sativa* L. ssp. *japonica*). *Science* 296: 92–100. <sup>4</sup>International Rice Genome Sequencing Project. 2005. The map-based sequence of the rice genome. *Nature* 436: 793–800. <sup>5</sup>Tuskan GA, DiFazio S, Jansson S, *et al.* 2006. The genome of black cottonwood, *Populus trichocarpa* (Torr. & Gray). *Science* 313: 1596–1604. <sup>6</sup>French-Italian Public Consortium for Grapevine Genome Characterisation. 2007. The grapevine genome sequence suggests ancestral hexaploidization in major angiosperm phyla. *Nature* 449: 463–467. <sup>7</sup>Ming R, Hou S, Feng Y, *et al.* 2008. The draft genome of the transgenic tropical fruit tree papaya (*Carica papaya* Linnaeus). *Nature* 452: 991–996. <sup>8</sup>Huang S, Li R, Zhang Z, *et al.* 2009. The genome of the cucumber, *Cucumis sativus* L. *Nature Genetics* 41: 1275–1281. <sup>9</sup>Paterson AH, Bowers JE, Bruggmann R, *et al.* 2009. The *Sorghum bicolor* genome and the diversification of grasses. *Nature* 457: 551–556. <sup>10</sup>Schnable PS, Ware D, Fulton RS, *et al.* 2009. The B73 maize genome: complexity, diversity, and dynamics. *Science* 326: 1112–1115. <sup>11</sup>The International *Brachypodium* Initiative. 2010. Genome sequencing and analysis of the model grass *Brachypodium distachyon*. *Nature* 463: 763–768.

these questions based on data for just two species (arabidopsis and rice). Five years on, now based on data for nine species, their conclusions are confirmed and amplified below.

When the first ‘complete’ genome sequence for a plant was announced in 2000 [i.e. *A. thaliana* (arabidopsis)] there were indeed hopes that this might herald a new era in genome size studies, providing the first accurate genome size value for a plant based on the total number of base pairs comprising the genome. Indeed, the publication of a truly complete genome sequence for the nematode *Caenorhabditis elegans* suggested that such a goal might be feasible (*C. elegans* Sequencing Consortium, 1998). Nevertheless, it soon became clear that in plants, as with other eukaryotes sequenced at the time, what was considered to be a ‘complete’ genome sequence actually represented a combination of DNA sequence information for all or at least most of the euchromatic portion of the genome together with an estimate of the amount of DNA in the heterochromatic part of the genome (Bennett *et al.*, 2003; Bennett and Leitch, 2005a). This compromise arose largely due to problems associated with sequencing highly repetitive regions of the genome. Thus, as noted by Bennett *et al.* (2003), the first release of the arabidopsis genome in 2000 actually included sequence data for only 115.4 Mb of the genome together with a rough estimate of 10 Mb for the unsequenced regions to give a total genome size of 125 Mb (Arabidopsis Genome Initiative, 2000). This contrasted with a carefully conducted study by Bennett *et al.* (2003) who estimated the genome size of arabidopsis to be 157 Mb using flow cytometry and *C. elegans* as the calibration standard – approx. 25% larger than the estimate based on complete genome sequencing.

Neither is the situation for arabidopsis unique. As the number of ‘complete’ genome sequences for plants has risen it is clear that many include estimates for the difficult-to-sequence repetitive regions of the genome and that the ‘complete’ genome size quoted in the publication is either based on adding the assembled and unassembled sequence data together (e.g. *Populus trichocarpa*) or just taken from the literature (e.g. *Vitis vinifera*). Even for one of the most recent ‘complete’ genome sequences, *Sorghum bicolor* (Paterson *et al.*, 2009), the researchers were unable to align all the DNA that had been sequenced, with the main problems arising in the centromeric regions. Consequently, their total size had to be estimated based on an assumed average centromere size of 4.8 Mb for each chromosome. In total, the assembled genome sequence comprised 697.6 Mb, while the total genome size was given as approx. 730 Mb, based on an estimate of the amount of unassembled DNA (see Table 3).

Clearly, although the amount of DNA sequence generated from such large-scale sequencing projects is impressive and the information obtained is immense, whole genome sequencing using current approaches continues to be unsuitable for providing accurate genome size estimates (Doležel and Greilhuber, 2010; Suda and Leitch, 2010). Indeed, given the above discussion two important points are noted:

- (1) Complete genome sequencing has so far failed to produce a C-value for any angiosperm species which is more accurate than the prime value for that species previously

estimated using non-molecular methods. Genome size estimates from complete genome sequencing should therefore not be used in preference to the prime value already listed in the compilations and the Plant DNA C-values Database.

- (2) Nevertheless, ‘complete genome sequencing’ has produced a highly accurate measurement of a minimum amount of DNA below which the real C-value cannot fall.

It is noted that the advent of next-generation (e.g. 454 LIFE Sciences, Solexa, SOLiD, Illumina and Helicos) and third-generation (e.g. Pacific Biosciences SMRT, Oxford Nanopore, Life Technologies FRET platform and the Ion Torrent Systems; Munroe and Harris, 2010) sequencing technologies are already revolutionizing the speed at which sequence data can be generated (Rusk, 2009; Martinez and Nelson, 2010). However, currently they seem unlikely to offer a way forward for generating accurate genome size estimates as the assembly of repetitive sequence data is still problematic, particularly for sequencing technologies which produce very short reads (i.e. approx. 100-bp lengths) such as those of Solexa, SOLiD and Helicos. Ways to overcome such problems are being developed (e.g. Rounsley *et al.*, 2009) by combining the speed of these methods with traditional physical mapping technology. Indeed, these approaches may eventually provide the way forward to more completely sequenced genomes. Nevertheless, truly complete genomes and hence accurate genome size measurements still seem overoptimistic expectations, at least for the forthcoming decade.

## TOMORROW

We have previously reviewed the main interests and opportunities of plant genome size research (Bennett and Leitch, 2005a, b) and identified several important aspects of progress, problems and prospects in the field over a 10-year horizon. Five years on it is timely to monitor those ideas, and to ask if mid-course corrections in aims and expectations are needed. Clearly, the field remains important and interest and activity in it continues to expand. The sections above outline both substantial progress on the expected trajectories as well as some major expected shortcomings. Most of the views and concerns we previously outlined remain valid, so changing them would be premature, although some can be usefully amplified here, especially a few key problems whose solutions require urgent imminent action.

The field occupies an important position at the interface of several concerns and can be expected to attract and generate further growth in the coming decade. Nevertheless, it is probably at a critical junction, where the extent to which such opportunities are grasped will depend on how genome size research is funded and coordinated in future.

The main aims of plant DNA C-value research seem unlikely to change over the next decade. Thus, the 2020 vision for the field is to maximize the quantity and quality of genome size estimates available, and to increase accessibility to and ease analysis of such data. Attention to data quality will remain focused on increasing its accuracy via better calibration standards and techniques and by improving its broad

representation of the global angiosperm flora. At the same time, looking behind and beyond DNA C-value numbers will further explore the molecular mechanisms responsible for variation in, and stabilization of, genome size within and between taxa, and of the time frames over which they can operate. Other work is likely to extend investigations of the uses and consequences of genome size data to increase knowledge and understanding of the biological significance of genome size information, and thereby to increase our knowledge of its uses as a predictor.

Forty-two years ago, when the first author began estimating DNA C-values in crop and related species at the Plant Breeding Institute Cambridge, UK, genome size estimates were known for approx. 200 angiosperms. Today the sample has increased 30-fold with estimates for 6287 species. So how has this been achieved? Progress in science is of several types. Much is directed within formal programmes which set goals and award funds for approved projects. In contrast, some research occurs outside this framework, undertaken by individuals with interests and opportunities to focus on it. The development and growth of knowledge of genome sizes in angiosperms is a prime example of the latter. The topic has never been formally identified as a particular goal by any committee or programme, nor allocated a specific budget (although a few grants for projects which include genome size estimations have been approved under general programmes). Thus, hitherto the expansion in genome size knowledge and understanding has developed mainly as a by-product of other research, or as an interest of individuals working on other projects or independently. Although the topic is now seen as a key mainstream strand of holistic genomics, it is still unclear how continued progress in the field will be funded. It seems likely that some future work will continue to generate first estimates for a few hundred taxa each year, driven and mainly undertaken by the interests and opportunities of a few enthusiasts, but with some informally recommended targets and monitoring. However, a real alternative to increase the flow of first estimates by several orders of magnitude could be through a formally coordinated approach, with targets set as part of a holistic genomics programme with broad (international) funding. Indeed, the development of modern technology and availability of new plant collections in combination with international collaborations provide a unique opportunity with the potential to achieve vastly improved representation of the global flora for a modest investment. An exploration of whether this can be funded through ongoing projects such as the iPlant Tree of Life (iPTOL) would be timely.

Ways in which the representation of genome size data for the global flora can be increased are numerous and two examples are discussed below.

#### *Uncovering and collating genome size data from diverse published sources*

The history of angiosperm genome size research includes examples of adding several large bodies of existing but unconnected information to the database. These include the addition of values for species originally reported only as relative values, but incorporated after new work obtained absolute estimates

for taxa in such studies by using known calibration standards (Bennett and Smith, 1976). Another example concerns efforts to locate and add previously unpublished estimates. This is epitomized by the addition of 411 such estimates (including first values for 308 species) by Zonneveld (see Zonneveld *et al.*, 2005). Thus, it is worth asking if opportunities exist to add substantial numbers of species' estimates from other sources. This seems possible given long entrenched patterns of literature citation. Even in western literature published in English, North American authors are much more likely to cite genome size estimates listed in North American journals (such as those of Arumuganathan and Earle, 1991a, b) whereas Europeans are more likely to cite estimates published in European journals. Such tendencies may have led to the omission of pools of genome size data published in non-western literature and languages. The present authors have previously excluded some estimates published in Russian or oriental journals, due to major technical problems (e.g. Zakirowa and Vakhtina, 1974; discussed in Bennett and Smith, 1976). However, other significant pools of quality genome size estimates published only in eastern European or oriental languages and journals may well have been overlooked, and be largely unknown in the west. This seems especially likely for the pre-computer, cold-war decades (1960–1980) when translations into English were fewer and global communication less free. This possibility should be explored with urgency given the loss of practitioners with first-hand knowledge of that period. It could prove highly worthwhile if it connects to untapped pools of first genome size estimates for target taxa endemic to under-represented geographical regions (e.g. Asia) and plant types (e.g. tundra, desert, montane).

TABLE 4. *The number and percentage of original references with first authors from various geographical regions among the 151 sources contributing to the present Appendix table compared with two previous compilations of angiosperm DNA amounts*

| Area                 | DNA C-value compilation |      |       |       |                  |      |                             |      |
|----------------------|-------------------------|------|-------|-------|------------------|------|-----------------------------|------|
|                      | 2005*                   |      | 2005† |       | Present Appendix |      | Total for all compilations‡ |      |
|                      | No.                     | %    | No.   | %     | No.              | %    | No.                         | %    |
| Europe               | 54                      | 61.4 | 1     | 100.0 | 103              | 68.2 | 359                         | 58.2 |
| UK                   | 10                      | 11.4 | 0     | 0.0   | 8                | 5.3  | 117                         | 19.0 |
| North America        | 13                      | 14.8 | 0     | 0.0   | 27               | 17.9 | 116                         | 18.8 |
| South & Meso America | 2                       | 2.3  | 0     | 0.0   | 7                | 4.6  | 28                          | 4.5  |
| Africa               | 2                       | 2.3  | 0     | 0.0   | 2                | 1.3  | 9                           | 1.5  |
| Asia                 | 17                      | 19.3 | 0     | 0.0   | 9                | 6.0  | 83                          | 13.5 |
| India                | 11                      | 12.5 | 0     | 0.0   | 2                | 1.3  | 60                          | 9.7  |
| China                | 2                       | 2.3  | 0     | 0.0   | 0                | 0.0  | 2                           | 0.3  |
| Australasia          | 0                       | 0.0  | 0     | 0.0   | 3                | 2.0  | 22                          | 3.6  |
| Australia            | 0                       | 0.0  | 0     | 0.0   | 1                | 0.7  | 11                          | 1.8  |
| Total                | 88                      |      |       |       | 151              |      | 617                         |      |

\* Bennett and Leitch (2005a).

† Zonneveld *et al.* (2005).

‡ Compilations 1–9 (see Table 1).

*Screening ex situ and in situ collections as sources of target taxa*

The need to improve geographical representation for angiosperm C-values was first noted in 1995 (Bennett and Leitch, 1995) and this was confirmed at the two plant genome size workshops held in 1997 and 2003. Bennett and Leitch (2005a) further highlighted the issue as a major problem. However, despite this, no specific regional targets have ever been set at any of the workshops, perhaps because those for improving systematic representation had top priority and seemed daunting to many. Consequently, representation by geographical region has never been directly quantified and this failure is unfortunate.

The qualitative impression that geographical representation is grossly unequal between regions reflects two critical concerns noted by Bennett and Leitch (2005a) regarding the geographical distribution of angiosperm C-value work.

(1) The first concerned a serious imbalance between the geographical distribution of research scientists working on genome size and of taxa whose C-values are unknown (Bennett *et al.*, 2000; Bennett and Leitch, 2005a). This is illustrated in Table 4 where an analysis of the 151 original sources contributing data to the Appendix shows that the first author for 68.2% of the publications had a European address, with 17.9% from North America, whilst only 6.0, 4.6 and 1.3% were from Asia, South and Meso-America, and Africa, respectively. Thus, the historical pattern of geographical imbalance between the distribution of researchers and plants with unknown genome sizes clearly shows no improvement. Indeed, a comparison with the previous analysis reported in Bennett and Leitch (2005a) shows changes including significant falls in source references with first authors in India. This is probably due to the 'obsolescence time bomb' (Bennett and Leitch, 1997, 2005a) as microdensitometers finally fail and have not, as yet, been replaced with flow cytometers.

(2) The second concern relates to the small number of first C-values by any author for species endemic to several large geographical regions. With notable exceptions, the sample is still dominated by crops and their wild relatives, other species growing near laboratories in temperate regions, mainly in Western Europe and North America, and model organisms. Consequently, we remain ignorant of the genome size profiles for species-rich floras of large nations such as China, Japan, South Africa, Brazil and Mexico, many of which are rich in endemics. For example, south-west China with over 20 000 species of plants has the most endemic-rich temperate flora of the world (Wang *et al.*, 1993, 1994) and yet genome size data for this region remain sparse. In addition, our knowledge of large islands, many of which also include biodiversity hotspots (e.g. Australia, Borneo and Madagascar where 80% of the 12 000 described plant species are endemic; Robinson, 2004) is unimproved.

There are two ways in which the rich botanical resources around the world could be used to increase geographical representation. One approach is to train operators and position flow cytometers in each target region, tasked with surveying the local flora while focusing on target taxa such as endemics (Leitch and Bennett, 2007). Acquiring suitable research material for such work may benefit from sourcing verified material in local botanical collections.

An alternative approach is to train operators and then position flow cytometers linked to large *ex situ* botanical collections. The way in which this may work can be illustrated by considering the Millennium Seed Bank (MSB) at RBG, Kew. The MSB was initiated in 1997 and was targeted to collect samples of all bankable species in the British Flora by 2000 as well as samples of 24 200 species representing about 10% of the global angiosperm flora by 2010. The former target was effectively reached by 2000, while with 25 000 species now collected the main target was successfully completed on time and under budget in 2009 [see Samara Issue 17 (2009), page 6: [www.kew.org/msbp/samara](http://www.kew.org/msbp/samara)]. Seed collecting is done under agreements with many countries and it is notable that this includes several whose floras have been identified as severely under-represented in the plant genome size database (e.g. China, South Africa and Madagascar). As small samples of about 100 seeds of banked taxa must be tested at intervals to monitor germination levels, such samples could also routinely be used to provide material for genome size studies and chromosome counts, with no further loss to the main banked samples. Such additional use as routine would clearly enhance the value of the banked samples by providing otherwise unknown genetic information about these living *ex situ* collections.

Subsequent to creating the MSB, a similar facility in partnership with the MSB was opened at Kunming in China in 2007, tasked with collecting 19 000 species (approx. two-thirds of the Chinese flora) within 15 years (Cyranoski, 2003). It is notable that by 2009 already nearly 5000 species had been collected (Li and Pritchard, 2009). If the owners of these genetic resources agree/approve, then linking the seed bank in Kunming with cytological and flow cytometry capabilities could certainly contribute to solving under-representation of the Chinese flora in a focused programme at minimal cost.

Indeed, if such an approach proves successful then replicating it in other regions of the world, particularly those with species-rich floras such as Africa, Australia and South America, will significantly broaden and extend our knowledge and provide new insights and understanding into the biological significance of angiosperm genome size diversity.

## DEDICATION

This paper is dedicated to the esteemed memory of Professor Hugh Rees FRS (1923–2009) who made many major contributions to plant genome size research. His seminal study on nuclear DNA amounts in wheat (Rees, 1963; Rees and Walters, 1965) showed the value of comparing genome sizes to investigate the ancestry of allopolyploids. He introduced many students and collaborators to using Feulgen photomicrodensitometry and to exploring its powerful applications. Their research revealed striking examples of intrageneric variation to generate significant early samples of genome size estimates for plant species (e.g. Rees *et al.*, 1966), and used such data in comparative studies to address broad questions in cell biology (Evans and Rees, 1971). He inspired many, including the present first author, who owe him an inestimable debt of gratitude for his foundational vision, generous enthusiasm and life-long encouragement.

## ACKNOWLEDGEMENTS

We would like to thank all our colleagues who have contributed genome size data to this paper and to L. Hanson, J. Greensmith and M. O'Reilley who helped in entering data into the Appendix table. Finally I.J.L. would like to thank NERC for financial support.

## LITERATURE CITED

- Albach DC, Greilhuber J. 2004. Genome size variation and evolution in *Veronica*. *Annals of Botany* **94**: 897–911.
- Amsellem L, Chevallier MH, Hossaert-McKey M. 2001. Ploidy level of the invasive weed *Rubus alceifolius* (Rosaceae) in its native range and in areas of introduction. *Plant Systematics and Evolution* **228**: 171–179.
- APG. 1998. An ordinal classification for the families of flowering plants. *Annals of the Missouri Botanical Garden* **85**: 531–553.
- APG II. 2003. An update of the Angiosperm Phylogeny Group classification for the orders and families of flowering plants. *Botanical Journal of the Linnean Society* **141**: 399–436.
- APG III. 2009. An update of the Angiosperm Phylogeny Group classification for the orders and families of flowering plants: APG III. *Botanical Journal of the Linnean Society* **161**: 105–121.
- Arabidopsis Genome Initiative. 2000. Analysis of the genome sequence of the flowering plant *Arabidopsis thaliana*. *Nature* **408**: 796–815.
- Armbrust EV, Berges JA, Bowler C, et al. 2004. The genome of the diatom *Thalassiosira pseudonana*: ecology, evolution, and metabolism. *Science* **306**: 79–86.
- Arumuganathan K, Earle ED. 1991a. Nuclear DNA content of some important plant species. *Plant Molecular Biology Reporter* **9**: 208–218.
- Arumuganathan K, Earle ED. 1991b. Estimation of nuclear DNA content of plants by flow cytometry. *Plant Molecular Biology Reporter* **9**: 229–241.
- Bacic T, Jogan N, Dolenc Koce J. 2007. *Luzula* sect. *Luzula* in the south-eastern Alps – karyology and genome size. *Taxon* **56**: 129–136.
- Baranyi M, Greilhuber J. 1996. Flow cytometric and Feulgen densitometric analysis of genome size variation in *Pisum*. *Theoretical and Applied Genetics* **92**: 297–307.
- Barow M, Jovtchev G. 2007. Endopolyploidy in plants and its analysis by flow cytometry. In: Doležel J, Greilhuber J, Suda J, eds. *Flow cytometry with plant cells*. Weinheim: Wiley-VCH Verlag GmbH & Co., 349–372.
- Barow M, Meister A. 2002. Lack of correlation between AT frequency and genome size in higher plants and the effect of nonrandomness of base sequences on dye binding. *Cytometry* **47**: 1–7.
- Barow M, Meister A. 2003. Endopolyploidy in seed plants is differently correlated to systematics, organ, life strategy and genome size. *Plant Cell and Environment* **26**: 571–584.
- Beaulieu JM, Leitch IJ, Knight CA. 2007a. Genome size evolution in relation to leaf strategy and metabolic rates revisited. *Annals of Botany* **99**: 495–505.
- Beaulieu JM, Moles AT, Leitch IJ, Bennett MD, Dickie JB, Knight CA. 2007b. Correlated evolution of genome size and seed mass. *New Phytologist* **173**: 422–437.
- Beaulieu JM, Leitch IJ, Patel S, Pendharkar A, Knight CA. 2008. Genome size is a strong predictor of cell size and stomatal density in angiosperms. *New Phytologist* **179**: 975–986.
- Beaulieu JM, Smith S, Leitch IJ. 2010. On the tempo of genome size evolution in angiosperms. *Journal of Botany* **2010**: Article ID 989152. doi:10.1155/2010/989152.
- Bennett MD. 1972. Nuclear DNA content and minimum generation time in herbaceous plants. *Proceedings of the Royal Society of London Series B* **181**: 109–135.
- Bennett MD. 1987. Variation in genomic form in plants and its ecological implications. *New Phytologist* **106**: 177–200.
- Bennett MD. 1998. Plant genome values: How much do we know? *Proceedings of the National Academy of Sciences, USA* **95**: 2011–2016.
- Bennett MD, Leitch IJ. 1995. Nuclear DNA amounts in angiosperms. *Annals of Botany* **76**: 113–176.
- Bennett MD, Leitch IJ. 1997. Nuclear DNA amounts in angiosperms – 583 new estimates. *Annals of Botany* **80**: 169–196.
- Bennett MD, Leitch IJ. 2005a. Nuclear DNA amounts in angiosperms – progress, problems and prospects. *Annals of Botany* **95**: 45–90.
- Bennett MD, Leitch IJ. 2005b. Plant genome size research – a field in focus. *Annals of Botany* **95**: 1–6.
- Bennett MD, Leitch IJ. 2005c. Genome size evolution in plants. In: Gregory TR, ed. *The evolution of the genome*. San Diego: Elsevier, 89–162.
- Bennett MD, Leitch IJ. 2010. Plant DNA C-values Database (release 5-0, December 2010). <http://data.kew.org/cvalues/>.
- Bennett MD, Smith JB. 1976. Nuclear DNA amounts in angiosperms. *Philosophical Transactions of the Royal Society of London Series B-Biological Sciences* **274**: 227–274.
- Bennett MD, Smith JB. 1991. Nuclear DNA amounts in angiosperms. *Philosophical Transactions of the Royal Society of London Series B-Biological Sciences* **334**: 309–345.
- Bennett MD, Smith JB, Heslop-Harrison JS. 1982. Nuclear DNA amounts in angiosperms. *Proceedings of the Royal Society of London Series B-Biological Sciences* **216**: 179–199.
- Bennett MD, Leitch IJ, Hanson L. 1998. DNA amounts in two samples of angiosperm weeds. *Annals of Botany* **82**: 121–134.
- Bennett MD, Bhandol P, Leitch IJ. 2000. Nuclear DNA amounts in angiosperms and their modern uses – 807 new estimates. *Annals of Botany* **86**: 859–909.
- Bennett MD, Leitch IJ, Price HJ, Johnston JS. 2003. Comparisons with *Caenorhabditis* (~100 Mb) and *Drosophila* (~175 Mb) using flow cytometry show genome size in *Arabidopsis* to be ~157 Mb and thus 25 % larger than the *Arabidopsis* genome initiative estimate of ~125 Mb. *Annals of Botany* **91**: 547–557.
- Bennett MD, Price HJ, Johnston JS. 2008. Anthocyanin inhibits propidium iodide DNA fluorescence in *Euphorbia pulcherrima*: implications for genome size variation and flow cytometry. *Annals of Botany* **101**: 777–790.
- Biradar DP, Rayburn AL. 1993. Heterosis and nuclear DNA content in maize. *Heredity* **71**: 300–304.
- Boscaiu M, Ellul P, Soriano P, Vicente O. 2008. Nuclear DNA content variation in *Halimium* and *Xolantha* (Cistaceae). *Plant Biosystems* **142**: 17–23.
- Boyko EV, Badaev NS, Maximov NG, Zelenin AV. 1984. Does DNA content change in the course of Triticale breeding. *Cereal Research Communication* **12**: 99–100.
- Bradshaw HD, Stettler RF. 1993. Molecular genetics of growth and development in *Populus*. 1. Triploidy in hybrid Poplars. *Theoretical and Applied Genetics* **86**: 301–307.
- Bureš P, Wang Y-F, Horová L, Suda J. 2004. Genome size variation in Central European species of *Cirsium* (Compositae) and their natural hybrids. *Annals of Botany* **94**: 353–363.
- C. elegans Sequencing Consortium. 1998. Genome sequence of the nematode *C. elegans*: a platform for investigating biology. *Science* **282**: 2012–2018.
- Carlón L, Casares GG, Laínz M, Moral GM, Pedraja ÓS, Schneeweiss GM. 2008. Más, a propósito de algunas *Phelipanche* Pomel, *Boulardia* F.W.Schultz y *Orobanchae* del oeste del Paleártico. *Documentos del Jardín Botánico Atlántico (Gijón)* **6**: 1–128.
- Chase MW, Hanson L, Albert VA, Whitten WM, Williams NH. 2005. Life history evolution and genome size in subtribe Oncidiinae (Orchidaceae). *Annals of Botany* **95**: 191–199.
- Cheng RLJ, Grant WF. 1973. Species relationships in the *Lotus corniculatus* group as determined by karyotype and cytophotometric analyses. *Canadian Journal of Genetics and Cytology* **15**: 101–115.
- Costich DE, Meagher TR, Yurkow EJ. 1991. A rapid means of sex identification in *Silene latifolia* by use of flow cytometry. *Plant Molecular Biology Reporter* **9**: 359–370.
- Cyranski D. 2003. Biodiversity schemes take root in China. *Nature* **425**: 890.
- Dart S, Kron P, Mable BK. 2004. Characterizing polyploidy in *Arabidopsis lyrata* using chromosome counts and flow cytometry. *Canadian Journal of Botany* **82**: 185–197.
- von Dassow P, Petersen TW, Chepurinov VA, Armbrust EV. 2008. Inter- and intraspecific relationships between nuclear DNA content and cell size in selected members of the centric diatom genus *Thalassiosira* (Bacillariophyceae). *Journal of Phycology* **44**: 335–349.
- Dolenc Koce J, Vilhar B, Bohanec B, Dermastia M. 2003. Genome size of Adriatic seagrasses. *Aquatic Botany* **77**: 17–25.
- Dolenc Koce J, Škondric S, Bacic T, Dermastia M. 2008. Amounts of nuclear DNA in marine halophytes. *Aquatic Botany* **89**: 385–389.
- Dolezalová I, Lebeda A, Janecek J, Čiháliková J, Erisková E. 2002. Variation in chromosome numbers and nuclear DNA contents in



- genetic resources of *Lactuca* L. species (Asteraceae). *Genetic Resources and Crop Evolution* **49**: 383–395.
- Doležel J. 1991. Flow cytometric analysis of nuclear DNA content in higher plants. *Phytochemical Analysis* **2**: 143–154.
- Doležel J, Bartoš J. 2005. Plant DNA flow cytometry and estimation of nuclear genome size. *Annals of Botany* **95**: 99–110.
- Doležel J, Greilhuber J. 2010. Nuclear genome size: are we getting closer? *Cytometry Part A* **77A**: 635–642.
- Doležel J, Sgorbati S, Lucretti S. 1992. Comparison of three DNA fluorochromes for flow cytometric estimation of nuclear DNA content in plants. *Physiologia Plantarum* **85**: 625–631.
- Doležel J, Doleželova M, Novak FJ. 1994. Flow cytometric estimation of nuclear DNA amount in diploid bananas (*Musa acuminata* and *M. balbisiana*). *Biologia Plantarum* **36**: 351–357.
- Doležel J, Greilhuber J, Lucretti S, et al. 1998. Plant genome size estimation by flow cytometry: inter-laboratory comparison. *Annals of Botany* **82** (Suppl. A): 17–26.
- Doležel J, Bartoš J, Voglmayr H, Greilhuber J. 2003. Nuclear DNA content and genome size of trout and human. *Cytometry Part A* **51A**: 127–128.
- Doležel J, Greilhuber J, Suda J. 2007. Estimation of nuclear DNA content in plants using flow cytometry. *Nature Protocols* **2**: 2233–2244.
- Eilam T, Anikster Y, Millet E, Manisterski J, Sag-Assif O, Feldman M. 2007. Genome size and genome evolution in diploid Triticeae species. *Genome* **50**: 1029–1037.
- Evans GM, Rees H. 1971. Mitotic cycles in dicotyledons and monocotyledons. *Nature* **212**: 697–699.
- Ferguson AR, O'Brien IEW, Yan G. 1997. Ploidy in *Actinidia*. *Acta Horticulturae* **444**: 67–71.
- Francis D, Davies MS, Barlow PB. 2008. A strong nucleotypic effect of DNA C-value on the cell cycle regardless of ploidy level. *Annals of Botany* **101**: 747–757.
- French-Italian Public Consortium for Grapevine Genome Characterisation. 2007. The grapevine genome sequence suggests ancestral hexaploidization in major angiosperm phyla. *Nature* **449**: 463–467.
- Fujimoto S, Ito M, Matsunaga S, Fukui K. 2005. An upper limit of the ratio of DNA volume to nuclear volume exists in plants. *Genes and Genetic Systems* **80**: 345–350.
- Galbraith DW. 2009. Simultaneous flow cytometric quantification of plant nuclear DNA contents over the full range of described angiosperm 2C values. *Cytometry Part A* **75A**: 692–698.
- Galbraith DW, Harkins KR, Maddox JM, Ayres NM, Sharma DP, Firoozabady E. 1983. Rapid flow cytometric analysis of the cell cycle in intact plant tissues. *Science* **220**: 1049–1051.
- Gao J, Scott JG. 2006. Use of quantitative real-time polymerase chain reaction to estimate the size of the house-fly *Musca domestica* genome. *Insect Molecular Biology* **15**: 835–837.
- Garnatje T, Valles J, Garcia S, et al. 2004. Genome size in *Echinops* L. and related genera (Asteraceae, Cardueae): karyological, ecological and phylogenetic implications. *Biology of the Cell* **96**: 117–124.
- Gatt M, Hammett K, Murray B. 1999. Confirmation of ancient polyploidy in *Dahlia* (Asteraceae) species using genomic *in situ* hybridization. *Annals of Botany* **84**: 39–48.
- Goff SA, Ricke D, Lan TH, et al. 2002. A draft sequence of the rice genome (*Oryza sativa* L. ssp. *japonica*). *Science* **296**: 92–100.
- Graham MJ, Nickell CD, Rayburn AL. 1994. Relationship between genome size and maturity group in soybean. *Theoretical and Applied Genetics* **88**: 429–432.
- Gregory TR. 2005. Genome size evolution in animals. In: Gregory TR. ed. *The evolution of the genome*. San Diego: Elsevier, 3–87.
- Gregory TR. 2006. Animal Genome Size Database. <http://www.genomesize.com>.
- Greilhuber J. 2005. Intraspecific variation in genome size in angiosperms – identifying its existence. *Annals of Botany* **95**: 91–98.
- Greilhuber J, Ebert I. 1994. Genome size variation in *Pisum sativum*. *Genome* **37**: 646–655.
- Greilhuber J, Obermayer R. 1997. Genome size and maturity group in *Glycine max* (soybean). *Heredity* **78**: 547–551.
- Greilhuber J, Doležel J, Lysak MA, Bennett MD. 2005. The origin, evolution and proposed stabilization of the terms ‘Genome size’ and ‘C-value’ to describe nuclear DNA contents. *Annals of Botany* **95**: 255–260.
- Greilhuber J, Borsch T, Müller K, Worberg A, Porembski S, Barthlott W. 2006. Smallest angiosperm genomes found in Lentibulariaceae with chromosomes of bacterial size. *Plant Biology* **8**: 770–777.
- Greilhuber J, Tensch EM, Loureiro J. 2007. Nuclear DNA content measurement. In: Doležel J, Greilhuber J, Suda J. eds. *Flow cytometry with plant cells*. Weinheim: Wiley-VCH, 67–102.
- Greuter W, Barrie FR, Burdet HM, et al. 1994. International code of botanical nomenclature (Tokyo Code) adopted by the Fifteenth International Botanical Congress, Yokohama, August–September 1993. *Regnum Vegetabile* 131. Königstein, Germany: Koeltz Scientific Books.
- Grundt HH, Obermayer R, Borgen L. 2005. Ploidal levels in the arctic-alpine polyploid *Draba lactea* (Brassicaceae) and its low-ploid relatives. *Botanical Journal of the Linnean Society* **147**: 333–347.
- Halkka O. 1964. A photometric study of the *Luzula* problem. *Hereditas* **52**: 81–88.
- Hanson L, McMahon KA, Johnson MAT, Bennett MD. 2001a. First nuclear DNA C-values for 25 angiosperm families. *Annals of Botany* **87**: 251–258.
- Hanson L, McMahon KA, Johnson MAT, Bennett MD. 2001b. First nuclear DNA C-values for another 25 angiosperm families. *Annals of Botany* **88**: 851–858.
- Hanson L, Brown RL, Boyd A, Johnson MAT, Bennett MD. 2003. First nuclear DNA C-values for 28 angiosperm genera. *Annals of Botany* **91**: 1–8.
- Hendrix B, Stewart JM. 2005. Estimation of the nuclear DNA content of *Gossypium* species. *Annals of Botany* **95**: 789–797.
- Hodgson JG, Sharafi M, Jalili A, et al. 2010. Stomatal vs. genome size in angiosperms: the somatic tail wagging the genomic dog? *Annals of Botany* **105**: 573–584.
- Houben A, Demidov D, Gernand D, Meister A, Leach CR, Schubert I. 2003. Methylation of histone H3 in euchromatin of plant chromosomes depends on basic nuclear DNA content. *Plant Journal* **33**: 967–973.
- Huang S, Li R, Zhang Z, et al. 2009. The genome of the cucumber, *Cucumis sativus* L. *Nature Genetics* **41**: 1275–1281.
- Huff DR, Palazzo AJ. 1998. Fine fescue species determination by laser flow cytometry. *Crop Science* **38**: 445–450.
- Jakob SS, Meister A, Blattner FR. 2004. Considerable genome size variation of *Hordeum* species (Poaceae) is linked to phylogeny, life form, ecology, and speciation rates. *Molecular Biology and Evolution* **21**: 860–869.
- Jedrzejczyk I, Sliwiska E. 2010. Leaves and seeds as materials for flow cytometric estimation of the genome size of 11 Rosaceae woody species containing DNA-staining inhibitors. *Journal of Botany* **2010**. doi:10.1155/2010/930895.
- Jeyaprakash A, Hoy MA. 2009. The nuclear genome of the phytoseiid *Metaseiulus occidentalis* (Acari: Phytoseiidae) is among the smallest known in arthropods. *Experimental and Applied Acarology* **47**: 263–273.
- Johnston JS, Pepper AE, Hall AE, et al. 2005. Evolution of genome size in Brassicaceae. *Annals of Botany* **95**: 229–235.
- Knight CA, Clancy RB, Götzenberger L, Dann L, Beaulieu JM. 2010. On the relationship between pollen size and genome size. *Journal of Botany* **2010**. doi:10.1155/2010/612017.
- Kochjarová J, Valachovic M, Bureš P, Mráz P. 2006. The genus *Cochlearia* L. (Brassicaceae) in the Eastern Carpathians and adjacent area. *Botanical Journal of the Linnean Society* **151**: 355–364.
- Kula A, Dudziak B, Sliwiska E, et al. 2006. Cytomorphological studies on American and European *Phleum commutatum* Gaud. (Poaceae). *Acta Biologica Cracoviensia Series Botanica* **48**: 99–108.
- Kullman B, Tamm H, Kullman K. 2005. Fungal Genome Size Database. <http://www.zbi.ee/fungal-genomesize>.
- Lafuma L, Balkwill K, Imbert E, Verlaque R, Maurice S. 2003. Ploidy level and origin of the European invasive weed *Senecio inaequidens* (Asteraceae). *Plant Systematics and Evolution* **243**: 59–72.
- Lawrence WJC. 1929. The genetics and cytology of *Dahlia* species. *Journal of Genetics* **21**: 125–159.
- Leitch IJ, Bennett MD. 2007. Genome size and its uses: the impact of flow cytometry. In: Doležel J, Greilhuber J, Suda J. eds. *Flow cytometry with plant cells*. Weinheim: Wiley-VCH, 153–176.
- Leitch IJ, Hanson L. 2002. DNA C-values in seven families fill phylogenetic gaps in the basal angiosperms. *Botanical Journal of the Linnean Society* **140**: 175–179.
- Leitch IJ, Soltis DE, Soltis PS, Bennett MD. 2005. Evolution of DNA amounts across land plants (Embryophyta). *Annals of Botany* **95**: 207–217.

- Leitch IJ, Kahandawala I, Suda J, *et al.* 2009. Genome size diversity in orchids – consequences and evolution. *Annals of Botany* **104**: 469–481.
- Leitch IJ, Beaulieu JM, Chase MW, Leitch AR, Fay MF. 2010. Genome size dynamics and evolution in monocots. *Journal of Botany* **2010**. doi:10.1155/2010/862516.
- Leong-Škornicková J, Šída O, *et al.* 2007. Chromosome numbers and genome size variation in Indian species of *Curcuma* (Zingiberaceae). *Annals of Botany* **100**: 505–526.
- Levin DA, Palestis BG, Jones RN, Trivers R. 2005. Phyletic hot spots for B chromosomes in angiosperms. *Evolution* **59**: 962–969.
- Li D-Z, Pritchard HW. 2009. The science and economics of *ex situ* plant conservation. *Trends in Plant Science* **14**: 614–621.
- Lodhi MA, Reisch BI. 1995. Nuclear DNA content of *Vitis* species, cultivars, and other genera of the Vitaceae. *Theoretical and Applied Genetics* **90**: 11–16.
- Loureiro J, Rodriguez E, Doležel J, Santos C. 2006a. Comparison of four nuclear isolation buffers for plant DNA flow cytometry. *Annals of Botany* **98**: 679–689.
- Loureiro J, Rodriguez E, Doležel J, Santos C. 2006b. Flow cytometric and microscopic analysis of the effect of tannic acid on plant nuclei and estimation of DNA content. *Annals of Botany* **98**: 515–527.
- Loureiro J, Rodriguez E, Doležel J, Santos C. 2007a. Two new nuclear isolation buffers for plant DNA flow cytometry: a test with 37 species. *Annals of Botany* **100**: 875–888.
- Loureiro J, Suda J, Doležel J. 2007b. FLOWer: a plant DNA flow cytometry database. In: Doležel J, Greilhuber J, Suda J. eds. *Flow cytometry with plant cells*. Weinheim: Wiley-VCH Verlag GmbH & Co., 423–438.
- Loureiro J, Rodriguez E, Santos C, Doležel J, Suda J. 2008. FLOWer: A Plant DNA Flow Cytometry Database (release 1.0, May 2008). <http://flower.web.ua.pt/>.
- Lysák MA, Doležel J. 1998. Estimation of nuclear DNA content in *Sesleria* (Poaceae). *Caryologia* **52**: 123–132.
- Mabberley DJ. 2008. *Mabberley's plant-book. A portable dictionary of plants, their classification and uses*. Cambridge: Cambridge University Press.
- Mahelka V, Suda J, Jarolímová V, Trávníček P, Krahulec F. 2005. Genome size discriminates between closely related taxa *Elytrigia repens* and *E. intermedia* (Poaceae: Triticeae) and their hybrid. *Folia Geobotanica* **40**: 367–384.
- Mandel P, Métais P, Cuny S. 1950. Les quantités d'acide désoxypentose-nucléique par leucocyte chez diverses espèces de Mammifères. *Comptes rendus des séances de la Société de biologie et de ses filiales* **231**: 1172–1174.
- Marie D, Brown SC. 1993. A cytometric exercise in plant DNA histograms, with 2C values for 70 species. *Biology of the Cell* **78**: 41–51.
- Martinez DA, Nelson MA. 2010. The next generation becomes the now generation. *PLoS Genetics* **6**: e1000906.
- McNeal J, Arumugunathan K, Kuehl J, Boore J, dePamphilis C. 2007. Systematics and plastid genome evolution of the cryptically photosynthetic parasitic plant genus *Cuscuta* (Convolvulaceae). *BMC Biology* **5**: 55.
- Ming R, Hou S, Feng Y, *et al.* 2008. The draft genome of the transgenic tropical fruit tree papaya (*Carica papaya* Linnaeus). *Nature* **452**: 991–996.
- Mirsky AE, Ris H. 1949. Variable and constant components of chromosomes. *Nature* **163**: 666.
- Munroe DJ, Harris TJR. 2010. Third-generation sequencing fireworks at Marco Island. *Nature Biotechnology* **28**: 426–428.
- Muratovic E, Bogunic F, Šoljan D, Siljak-Yakovlev S. 2005. Does *Lilium bosniacum* merit species rank? A classical and molecular-cytogenetic analysis. *Plant Systematics and Evolution* **252**: 97–109.
- Murray BG, Weir IE, Ferguson AR, de Lange PJ. 2003. Variation in DNA C-value and haploid genome size in New Zealand native grasses. *New Zealand Journal of Botany* **41**: 63–69.
- Murray BG, De Lange PJ, Ferguson AR. 2005. Nuclear DNA variation, chromosome numbers and polyploidy in the endemic and indigenous grass flora of New Zealand. *Annals of Botany* **96**: 1293–1305.
- Naganowska B, Wolko B, Sliwiska E, Kaczmarek Z. 2003. Nuclear DNA content variation and species relationships in the genus *Lupinus* (Fabaceae). *Annals of Botany* **92**: 349–355.
- Naganowska B, Wolko B, Sliwiska E, Kaczmarek Z, Schifino-Wittmann M. 2006. 2C DNA variation and relationships among New World species of the genus *Lupinus* (Fabaceae). *Plant Systematics and Evolution* **256**: 147–157.
- Noirot M, Barre P, Louarn J, Duperray C, Hamon S. 2000. Nucleus-cytosol interactions – A source of stoichiometric error in flow cytometric estimation of nuclear DNA content in plants. *Annals of Botany* **86**: 309–316.
- Noirot M, Poncet V, Barre P, Hamon P, Hamon S, De Kochko A. 2003. Genome size variations in diploid African *Coffea* species. *Annals of Botany* **92**: 709–714.
- Obermayer R, Greilhuber J. 2006. Cryptopolyploidy revisited: the case of *Vinca* (Apocynaceae). *Plant Systematics and Evolution* **256**: 201–208.
- Obermayer R, Leitch IJ, Hanson L, Bennett MD. 2002. Nuclear DNA C-values in 30 species double the familial representation in pteridophytes. *Annals of Botany* **90**: 209–217.
- Ohri D. 2005. Climate and growth form: the consequences for genome size in plants. *Plant Biology* **7**: 449–458.
- Ohri D, Kumar A. 1986. Nuclear DNA amounts in some tropical hardwoods. *Caryologia* **39**: 303–307.
- Ohri D, Bhargava A, Chatterjee A. 2004. Nuclear DNA amounts in 112 species of tropical hardwoods – New estimates. *Plant Biology* **6**: 555–561.
- Panda KK, Panigrahy K, Das AB, Panda BB. 2007. Analyses of chromosome number, nuclear DNA content and RAPD profile in three morphotypes of *Pandanus fascicularis* Lam. *Plant Genetic Resources Newsletter* **152**: 12–22.
- Panda KK, Das AB, Panda BB. 2009. Use and variation of *Pandanus tectorius* Parkinson (*P. fascicularis* Lam.) along the coastline of Orissa, India. *Genetic Resources and Crop Evolution* **56**: 629–637.
- Paterson AH, Bowers JE, Bruggmann R, *et al.* 2009. The *Sorghum bicolor* genome and the diversification of grasses. *Nature* **457**: 551–556.
- Paton AJ, Brummitt N, Govaerts R, *et al.* 2008. Towards Target 1 of the Global Strategy for Plant Conservation: a working list of all known plant species – progress and prospects. *Taxon* **57**: 602–611.
- Pedersen RA. 1971. DNA content, ribosomal gene multiplicity, and cell size in fish. *Journal of Experimental Zoology* **177**: 65–79.
- Pellicer J, Fay MF, Leitch IJ. 2010. The largest eukaryotic genome of them all? *Botanical Journal of the Linnean Society* **164**: 10–15.
- Pinto G, Loureiro J, Lopes T, Santos C. 2004. Analysis of the genetic stability of *Eucalyptus globulus* Labill. somatic embryos by flow cytometry. *Theoretical and Applied Genetics* **109**: 580–587.
- Price HJ, Dillon SL, Hodnett G, Rooney WL, Ross L, Johnston JS. 2005. Genome evolution in the genus *Sorghum* (Poaceae). *Annals of Botany* **95**: 219–228.
- Prokopowich CD, Gregory TR, Crease TJ. 2003. The correlation between rDNA copy number and genome size in eukaryotes. *Genome* **46**: 48–50.
- Rayburn AL, Biradar DP, Bullock DG, McMurphy LM. 1993. Nuclear DNA content in F<sub>1</sub> hybrids of maize. *Heredity* **70**: 294–300.
- Rees H. 1963. Deoxyribonucleic acid and the ancestor of wheat. *Nature* **198**: 108–109.
- Rees H, Walters MR. 1965. Nuclear DNA and the evolution of wheat. *Heredity* **20**: 73–82.
- Rees H, Cameron FM, Hazarika MH, Jones GH. 1966. Nuclear variation between diploid angiosperms. *Nature* **211**: 828–830.
- Robinson JG. 2004. The natural history of Madagascar. *Science* **304**: 53–53.
- Rosenbaumová R, Placková I, Suda J. 2004. Variation in *Lamium* subg. *Galeobdolon* (Lamiaceae) – insights from ploidy levels, morphology and isozymes. *Plant Systematics and Evolution* **244**: 219–244.
- Röser M, Johnson MAT, Hanson L. 1997. Nuclear DNA amounts in palms (Arecaceae). *Botanica Acta* **110**: 79–89.
- Rossi AAB, Clarindo WR, Carvalho CR, de Oliveira LO. 2008. Karyotype and nuclear DNA content of *Psychotria ipecaacuanha*: a medicinal species. *Cytologia* **73**: 53–60.
- Ross-Ibarra J. 2007. Genome size and recombination in angiosperms: a second look. *Journal of Evolutionary Biology* **20**: 800–806.
- Rounsley S, Marri P, Yu Y, *et al.* 2009. De novo next generation sequencing of plant genomes. *Rice* **2**: 35–43.
- Rusk N. 2009. Cheap third-generation sequencing. *Nature Methods* **6**: 244–245.
- Schmidt-Lebuhn AN, Fuchs J, Kessler M. 2008. Flow cytometric measurements do not reveal different ploidy levels in *Minthostachys* (Lamiaceae). *Plant Systematics and Evolution* **271**: 123–128.
- Schmuths H, Meister A, Horres R, Bachmann K. 2004. Genome size variation among accessions of *Arabidopsis thaliana*. *Annals of Botany* **93**: 317–321.

- Schnable PS, Ware D, Fulton RS, *et al.* 2009. The B73 maize genome: complexity, diversity, and dynamics. *Science* **326**: 1112–1115.
- Sliwinska E, Zielinska E, Jedrzejczyk I. 2005. Are seeds suitable for flow cytometric estimation of plant genome size? *Cytometry Part A* **64A**: 72–79.
- Sliwinska E, Pisarczyk I, Pawlik A, Galbraith DW. 2009. Measuring genome size of desert plants using dry seeds. *Botany-Botanique* **87**: 127–135.
- Sørensen PD. 1969. Revision of the genus *Dahlia* (Compositae, Heliantheae-Coreopsidinae). *Rhodora* **71**: 309–416.
- Stehlik I, Kron P, Barrett SCH, Husband BC. 2007. Sexing pollen reveals female bias in a dioecious plant. *New Phytologist* **175**: 185–194.
- Stoffelen P, Noirot M, Couturon E, Bontems S, De Block P, Anthony F. 2009. *Coffea anthonyi*, a new self-compatible Central African coffee species, closely related to an ancestor of *Coffea arabica*. *Taxon* **58**: 133–140.
- Suda J. 2002. New DNA ploidy level in *Empetrum* (Empetraceae) revealed by flow cytometry. *Annales Botanici Fennici* **39**: 133–141.
- Suda J, Leitch IJ. 2010. The quest for suitable reference standards in genome size research. *Cytometry Part A* **77A**: 717–720.
- Suda J, Kyncl T, Freiová R. 2003. Nuclear DNA amounts in Macaronesian angiosperms. *Annals of Botany* **92**: 153–164.
- Suda J, Kyncl T, Jarolimova V. 2005. Genome size variation in Macaronesian angiosperms: forty percent of the Canarian endemic flora completed. *Plant Systematics and Evolution* **252**: 215–238.
- Suda J, Krahulcová A, Trávníček P, Rosenbaumová R, Peckert T, Krahulec F. 2007. Genome size variation and species relationships in *Hieracium* sub-genus *Pilosella* (Asteraceae) as inferred by flow cytometry. *Annals of Botany* **100**: 1323–1335.
- Swift H. 1950. The constancy of deoxyribose nucleic acid in plant nuclei. *Proceedings of the National Academy of Sciences (USA)* **36**: 643–654.
- Temsch EM, Greilhuber J, Hammett KRW, Murray BG. 2008. Genome size in *Dahlia* Cav. (Asteraceae-Coreopsidae). *Plant Systematics and Evolution* **276**: 157–166.
- The International Brachypodium Initiative. 2010. Genome sequencing and analysis of the model grass *Brachypodium distachyon*. *Nature* **463**: 763–768.
- Tiersch TR, Chandler RW, Wachtel SS, Elias S. 1989. Reference standards for flow cytometry and application in comparative studies of nuclear DNA content. *Cytometry* **10**: 706–710.
- Turpeinen T, Kulmala J, Nevo E. 1999. Genome size variation in *Hordeum spontaneum* populations. *Genome* **42**: 1094–1099.
- Van't Hof J. 1965. Relationships between mitotic cycle duration S period duration and average rate of DNA synthesis in root meristem cells of several plants. *Experimental Cell Research* **39**: 48–58.
- Vendrey R, Vendrey C. 1948. La teneur du noyau cellulaire en acide désoxyribonucléique à travers les organes, les Individus et les espèces animales: Techniques et premiers résultats. *Experientia* **4**: 434–436.
- Vilhar B, Vidic T, Jogan N, Dermastia M. 2002. Genome size and the nucleolar number as estimators of ploidy level in *Dactylis glomerata* in the Slovenian Alps. *Plant Systematics and Evolution* **234**: 1–13.
- Vogel JP, Garvin DF, Leong OM, Hayden DM. 2006. *Agrobacterium*-mediated transformation and inbred line development in the model grass *Brachypodium distachyon*. *Plant Cell Tissue and Organ Culture* **84**: 199–211.
- Walker DJ, Monino I, Gonzalez E, Frayssinet N, Correal E. 2005. Determination of ploidy and nuclear DNA content in populations of *Atriplex halimus* (Chenopodiaceae). *Botanical Journal of the Linnean Society* **147**: 441–448.
- Walker DJ, Monino I, Correal E. 2006. Genome size in *Bituminaria bituminosa* (L.) C.H. Stirton (Fabaceae) populations: separation of “true” differences from environmental effects on DNA determination. *Environmental and Experimental Botany* **159**: 104–116.
- Wang WT, Wu SG, Lang KY *et al.* (editors). 1993. *Vascular plants of the Hengduan Mountains, Vol. 1: Pteridophyta, Gymnospermae, Dicotyledoneae (Saururacea to Cornaceae)*. Beijing: Science Press.
- Wang WT, Wu SG, Lang KY, Li PQ, Pu FT, Chen SK (editors). 1994. *Vascular plants of the Hengduan Mountains, Vol. 2: Dicotyledoneae (Diapensiaceae to Asteraceae) to Monocotyledoneae (Typhaceae to Orchidaceae)*. Beijing: Science Press.
- Watson JD, Crick FHC. 1953. Molecular structure of nucleic acids – a structure for deoxyribonucleic acid. *Nature* **171**: 737–738.
- Weiss-Schneeweiss H, Greilhuber J, Schneeweiss GM. 2005. Genome size evolution in holoparasitic *Orobanche* (Orobanchaceae) and related genera. *American Journal of Botany* **93**: 148–156.
- Wilhelm J, Pingoud A, Hahn M. 2003. Real-time PCR-based method for the estimation of genome sizes. *Nucleic Acids Research* **31**: article e50.
- Yu J, Hu SN, Wang J, *et al.* 2002. A draft sequence of the rice genome (*Oryza sativa* L. ssp. *indica*). *Science* **296**: 79–92.
- Zakirova RO, Vakhtina LI. 1974. Cytophotometrical and caryological investigation of some species of the genus *Allium* subgenus *Melanocrommyum* (Webb et Berth.) Wendelbo, Sect. *Melanocrommyum*. *Botanical Journal of the Union of Soviet Socialist Republics* **12**: 1819–1827.
- Zonneveld BJM. 2008. The systematic value of nuclear DNA content for all species of *Narcissus* L. (Amaryllidaceae). *Plant Systematics and Evolution* **275**: 109–132.
- Zonneveld BJM. 2010. New record holders for maximum genome size in eudicots and monocots. *Journal of Botany* **2010**: article ID 527357. doi:10.1155/2010/527357.
- Zonneveld BJM, Duncan GD. 2003. Taxonomic implications of genome size and pollen colour and vitality for species of *Agapanthus* L'Héritier (Agapanthaceae). *Plant Systematics and Evolution* **241**: 115–123.
- Zonneveld BJM, Duncan GD. 2006. Genome size for the species of *Nerine* Herb. (Amaryllidaceae) and its evident correlation with growth cycle, leaf width and other morphological characters. *Plant Systematics and Evolution* **257**: 251–260.
- Zonneveld BJM, Grimshaw JM, Davis AP. 2003. The systematic value of nuclear DNA content in *Galanthus*. *Plant Systematics and Evolution* **241**: 89–102.
- Zonneveld BJM, Leitch IJ, Bennett MD. 2005. First nuclear DNA amounts in more than 300 angiosperms. *Annals of Botany* **96**: 229–244.
- Zuccaro A, Basiewicz M, Zurawska M, Biedenkopf D, Kogel KH. 2009. Karyotype analysis, genome organization, and stable genetic transformation of the root colonizing fungus *Piriformospora indica*. *Fungal Genetics and Biology* **46**: 543–550.

## APPENDIX

## Notes to the Appendix

The Appendix appears on pp. 485–586.

Named references in the following notes are given above in ‘Literature cited’, while numbered references are given in ‘Original references for DNA values’ following the table.

(a) The original references for species DNA amounts in the Appendix are given in a numbered list following the ‘Notes to the Appendix’. Reference numbers follow on sequentially from those given in ‘Notes to Table 8’ by Bennett and Smith (1976, references 1–54) ‘Notes to Table 1’ by Bennett *et al.* (1982, references 55–107), Bennett and Smith (1991, references 108–163), ‘Notes to the Appendix’ by Bennett and Leitch (1995, references 164–269), ‘Notes to the Appendix’ by Bennett and Leitch (1997, references 270–306), ‘Notes to the Appendix’ by Bennett *et al.* (2000, references 307–377), ‘Notes to the Appendix’ by Bennett and Leitch (2005a, references 378–465) and Zonneveld *et al.* (2005, reference 466).

(b1) Bennett and Smith (1991) gave absolute 4C DNA values for 11 angiosperm species recommended for use as calibration standards to estimate DNA amounts in other species. More recently, Bennett *et al.* (2003) measured the genome size of *A. thaliana* to be 1C = 0.16 pg by calibration against *C. elegans* whose genome has been completely sequenced (100.4 Mb). These species and their DNA amounts are given in Table 5. If a species was calibrated in direct comparison with any one or more of the 12 standard species then the standard species used is identified in column 15 of the Appendix by the appropriate Key letter given in Table 5 (e.g. F is *Hordeum vulgare*). If a species

was first calibrated using a standard species listed above, then the original standard species is identified first and the intermediate standard species used to calibrate those species listed with it is also denoted by its number in column 1 of the Appendix. For instance, standard F (*H. vulgare*) was used to measure *Triticum turgidum* subsp. *durum* ‘Inbar’ (species 2118p in the Appendix), which was then used as an intermediate standard to estimate other diploid Triticeae species given by Eilam *et al.* (2007, reference 605). The calibration standard for such Triticeae species is therefore given as F-2118p.

(b2) In reference 502 (Garnatje *et al.*, 2004) *Hordeum vulgare* ‘Sultan’ was used as the calibration standard but they assumed a 4C DNA value of 19.62 pg (after recalibrating it against *Petunia hybrida* ‘PxPc6’ and *Lycopersicon esculentum* ‘Roma’) instead of 19.46 pg, which is the value given in Bennett and Smith (1976) and listed in Table 5.

(c) In many references listed in ‘Original references for DNA values’ the authors used a cultivar of a standard species different from that listed in Table 5; these are listed in Table 6. In some cases the C-value of the cultivar used was assumed to be the same as that of the cultivar given in Table 5. Evidence of intraspecific variation in a number of species suggests that such assumptions may sometimes be incorrect. In other cases the C-value of the cultivar used was different from that of the standard species listed in Table 5. For example, references 468, 536, 553 and 521 used the cultivar ‘Express Long’ of *Pisum sativum* with a 4C DNA value of 16.74 pg determined by Marie and Brown (1993). This value is lower than the 4C DNA amount of the cultivar ‘Minerva Maple’ of 19.46 pg given in Table 5.

(d) In references 518, 570, 574 and 601 the cultivar of the calibration standard was not given. References 518 and 601 used *Vicia faba* as a calibration standard, whereas reference 570 used *Triticum aestivum* and reference 574 used *Pisum sativum*.

(e) In a number of original references the authors used a plant species not listed in Table 5 as a calibration standard. These are listed in Table 7.

(f) Several papers listed in ‘Original references for DNA values’ used animal cells as calibration standards. Thus, references 486, 606 and 609 used chicken erythrocytes with an assumed 4C DNA value of 4.66 pg (taken from Galbraith

*et al.*, 1983, or Costich *et al.*, 1991) whereas reference 516 assumed a 4C DNA value of 4.68 pg (Mirsky and Ris, 1949). The calibration standard is abbreviated to *Gallus* in column 15 of the Appendix. Both references 470 and 600 used red blood cells from the rainbow trout (*Oncorhynchus mykiss*) as a standard but assumed different 4C DNA amounts – 9.94 pg (reference 470, Turpeinen *et al.*, 1999) and 10.1 pg (reference 600, Arumuganathan and Earle, 1991b). In both cases the abbreviation of Trout is used in the Appendix. Finally, male human leucocytes were used as a standard in reference 579 with an assumed 4C DNA amount of 14.00 pg (Tiersch *et al.*, 1989). The abbreviation of *Homo* is given in column 15 of the Appendix.

(g) When a new estimate (or estimates) is given for a species or subspecies already listed by Bennett and Smith (1976, 1991), Bennett *et al.* (1982, 2000) or Bennett and Leitch (1995, 1997), the estimate is given a number and a lower-case letter in column 1 of the Appendix. An ‘a’ implies that the value is preferred to any estimate for that species listed previously by the first author. Where several estimates are available for the same species, the ‘a’ value would automatically be chosen in any arithmetical or statistical calculations. In this context, single estimates for species and ‘a’ values are referred to as ‘prime entries’.

(h) Intraspecific variation in nuclear DNA amount is claimed to occur in this species. Consequently, the values given in the Appendix should not be assumed to be correct for all accessions of the species. Where several C-values are listed for a single species with the same ploidy level or chromosome number within a taxon, then only the minimum and maximum values reported from a single reference are listed in the Appendix.

(i) A range of DNA amounts was reported for this species in the reference cited in column 13 of the Appendix. Intraspecific variation was not claimed to occur, so the nature of this variation is unclear. Where estimates differed by more than 10 % the minimum and maximum values are given for the same ploidy level or chromosome number in the Appendix; otherwise, only the highest value is given.

(j) According to the International Code of Botanical Nomenclature (Greuter *et al.*, 1994), the names of plant families must end in -aceae. However, eight plant families are exceptions in that each has two alternative names, both of which are correct under the Botanical Code. One is a standard name, ending in -aceae, and the other is an exception, sanctioned by long usage. These and their alternatives are as follows: Palmae (Arecaceae), Gramineae (Poaceae), Cruciferae (Brassicaceae), Leguminosae (Fabaceae), Guttiferae (Clusiaceae), Umbelliferae (Apiaceae), Labiatae (Lamiaceae) and Compositae (Asteraceae).

(k) Recent cladistic analysis using both molecular and non-molecular phylogenetic data has resulted in a revised classification of families by the Angiosperm Phylogeny Group (APG) (APG III, 2009). Familial names used in the APG classification are followed in the Appendix. Thus, although Walker *et al.* (2005, reference 469) placed *Atriplex halimus* in Chenopodiaceae, molecular and non-molecular phylogenetic data recognize that this family is embedded within Amaranthaceae (APG III, 2009) so Amaranthaceae is given in the Appendix.

TABLE 5. The 12 angiosperm species recommended for use as calibration standards

| Key | Standard species                          | 4C DNA amount (pg) |
|-----|-------------------------------------------|--------------------|
| A   | <i>Triticum aestivum</i> ‘Chinese Spring’ | 69.27              |
| B   | <i>Allium cepa</i> ‘Ailsa Craig’          | 67.00              |
| C   | <i>Vicia faba</i> PBI, inbred line 6      | 53.31              |
| D   | <i>Anemone virginiana</i> line AV 200     | 35.67              |
| E   | <i>Secale cereale</i> ‘Petkus Spring’     | 33.14              |
| F   | <i>Hordeum vulgare</i> ‘Sultan’           | 22.24              |
| G   | <i>Pisum sativum</i> ‘Minerva Maple’      | 19.46              |
| H   | <i>Zea mays</i> ‘W64A’                    | 10.93              |
| I   | <i>Senecio vulgaris</i> (PBI population)  | 6.33               |
| J   | <i>Vigna radiata</i> ‘Berken’             | 2.12               |
| K   | <i>Oryza sativa</i> ‘IR36’                | 2.02               |
| L   | <i>Arabidopsis thaliana</i> ‘Columbia’    | 0.64               |

TABLE 6. Cultivars of standard species used that differ from those listed in Table 5

| Original reference number                                                 | Plant calibration standard used                                     | Assumed 4C DNA amount used by authors or the Original reference (column 1) and the reference (if given) (pg) |
|---------------------------------------------------------------------------|---------------------------------------------------------------------|--------------------------------------------------------------------------------------------------------------|
| 481                                                                       | <i>Allium cepa</i>                                                  |                                                                                                              |
| 492                                                                       | ‘Stuttgarter Riesen’                                                | 67.0 (Bennett and Smith, 1976)                                                                               |
| 501                                                                       | var. <i>cepa</i>                                                    | No value or reference given                                                                                  |
| 518                                                                       | ‘Nasik Red’                                                         | 67.0 (Bennett <i>et al.</i> , 2000)                                                                          |
| 558                                                                       | ‘Alice’                                                             | 67.0 (Doležel <i>et al.</i> , 1998)                                                                          |
|                                                                           | ‘Deshi’                                                             | 67.1 (Van’t Hof, 1965)                                                                                       |
|                                                                           | <i>Hordeum vulgare</i>                                              |                                                                                                              |
| 481                                                                       | ‘Ditta’                                                             | 20.25 (Baranyi and Greilhuber, 1996)                                                                         |
| 497                                                                       | ‘Ditta’                                                             | 20.08 (Doležel <i>et al.</i> , 1998)                                                                         |
| 518, 594                                                                  | ‘Hitchcock’                                                         | 21.36 (no reference given)                                                                                   |
| 604, 605                                                                  | ‘Nigrate’                                                           | 22.0 (Bennett and Leitch, 2005a)                                                                             |
| 545                                                                       | <i>Oryza sativa</i> subsp. <i>japonica</i> ‘Nipponbare’             | 1.82 (no reference given)                                                                                    |
|                                                                           | <i>Pisum sativum</i>                                                |                                                                                                              |
| 527                                                                       | ‘Lincoln’                                                           | 17.68 (Greilhuber and Ebert, 1994)                                                                           |
| 489, 502, 538                                                             | ‘Express Long’                                                      | 16.74 (no reference given)                                                                                   |
| 468, 536, 553, 521                                                        | ‘Express Long’                                                      | 16.74 (Marie and Brown, 1993)                                                                                |
| 477, 552, 555, 557, 563, 582, 586, 588, 590                               | ‘Ctirad’                                                            | 18.18 (Doležel <i>et al.</i> , 1998)                                                                         |
| 569                                                                       | ‘Ctirad’                                                            | 17.7 (Suda <i>et al.</i> , 2007)                                                                             |
| 474, 479, 505, 529, 530, 535, 572, 580                                    | ‘Kleine Rheinländerin’                                              | 17.68 (Greilhuber and Ebert, 1994)                                                                           |
| 517                                                                       | ‘Kleine Rheinländerin’                                              | 17.68 (no reference given)                                                                                   |
| 597                                                                       | ‘Kleine Rheinländerin’                                              | No value or reference given                                                                                  |
| 524                                                                       | ‘Set’                                                               | 18.22 (Naganowska <i>et al.</i> , 2006)                                                                      |
| 491, 554                                                                  | ‘Viktoria, Kifejtő Borsó’                                           | 18.18 (Doležel <i>et al.</i> , 1998)                                                                         |
| 492                                                                       | subsp. <i>sativum</i> convar. <i>sativum</i> var. <i>ponderosum</i> | 18.14 (Doležel <i>et al.</i> , 1992)                                                                         |
|                                                                           | <i>Secale cereale</i>                                               |                                                                                                              |
| 491                                                                       | IPK GenBank accession no. R 737                                     | 33.60 (Jakob <i>et al.</i> , 2004)                                                                           |
| 533                                                                       | var. <i>cereale</i> ‘Dankovske’                                     | 32.38 (Doležel <i>et al.</i> , 1998)                                                                         |
| 597                                                                       | ‘Dankovske’                                                         | 31.14 (Doležel <i>et al.</i> , 1998)                                                                         |
|                                                                           | <i>Triticum aestivum</i>                                            |                                                                                                              |
| 518, 595                                                                  | ‘Arapahoe’                                                          | 69.36 (no reference given)                                                                                   |
| 609                                                                       | ‘Chaika’                                                            | 69.3 (Bennett and Smith, 1976)                                                                               |
| 570                                                                       | ‘Shin Chunaga’                                                      | 68 000 Mb (Fujimoto <i>et al.</i> , 2005)                                                                    |
| 475, 480                                                                  | ‘Triple Dirk’                                                       | 61.80 (ref. not given)                                                                                       |
| 593                                                                       | var. <i>lutescens</i>                                               | 68.6 (Mahelka <i>et al.</i> , 2005)                                                                          |
|                                                                           | <i>Vicia faba</i>                                                   |                                                                                                              |
| 518                                                                       | ‘Inovec’                                                            | 52.12 (Doležel <i>et al.</i> , 1998)                                                                         |
| 563                                                                       | ‘Inovec’                                                            | 53.80 (Doležel <i>et al.</i> , 1992)                                                                         |
| 492                                                                       | subsp. <i>minor</i> var. <i>minor</i> subvar. <i>rigida</i>         | No value or reference given                                                                                  |
|                                                                           | <i>Zea mays</i>                                                     |                                                                                                              |
| 467, 477, 499, 514, 524, 542, 543, 550, 552, 563, 569, 573, 582, 585, 603 | ‘CE-777’                                                            | 10.86 (Lysák and Doležel, 1998)                                                                              |
| 564                                                                       | ‘W22’                                                               | 10.70 (Biradar and Rayburn, 1993)                                                                            |
| 487                                                                       | subsp. <i>mays</i> ‘Opaque 2’                                       | 13.32 (Bennett and Smith, 1976)                                                                              |

(l) The authority for this species is either unknown or unclear to the present authors.

(m) Whether voucher specimens exist for this species is unknown to the present authors.

(m1) No voucher exists for this species but the material was grown from well-defined seed stocks.

(n) The chromosome number of this species is either unknown or unclear to the present authors.

(o) The chromosome count for this species was taken from the literature and not determined by the authors of the reference cited.

(p) The ploidy level of this species is either uncertain or unclear to the present authors.

(q) The life cycle type of this species is either unknown or unclear to the present authors.

(r) The method used to measure the DNA amount is unclear.

(s) The factor of 1 pg = 978 Mbp was used to convert picograms to Mbp (Doležel *et al.*, 2003).

(t) As a rule, replicated diplophase nuclei contain a 4C DNA amount producing two unreplicated 2C nuclei by mitotic division and four 1C gametic nuclei after meiosis (irrespective of ploidy level). This convention applies well to polyploid taxa with diploidized meiotic chromosome pairing, which produce functional balanced polyhaploid gametes with 1C DNA amounts at meiosis. Thus, 4C estimates were automatically divided by 4 to generate 1C values given for all taxa of even ploidy level listed in the Appendix. However, the resulting ‘1C’ data are not biologically meaningful for taxa with odd ploidies. Consequently, the Appendix gives only 2C and 4C values for such taxa.

(u) There is no obvious basic number for the genus *Luzula* due to the presence of holocentric chromosomes. It is therefore

TABLE 7. Plant species used as calibration standards but not listed in Table 5

| Original reference number                                       | Plant calibration standard used                                 | Assumed 4C DNA amount (pg)                    | Abbreviation used in column 15 of Appendix |
|-----------------------------------------------------------------|-----------------------------------------------------------------|-----------------------------------------------|--------------------------------------------|
| 476                                                             | <i>Actinidia chinensis</i>                                      | 5.12 (Ferguson <i>et al.</i> , 1997)          | <i>Actinidia</i>                           |
| 473, 482, 483, 532, 581                                         | <i>Agave americana</i>                                          | 31.8 (Zonneveld and Duncan, 2003)             | <i>Agave</i> sp.                           |
| 562                                                             | <i>Bellis perennis</i>                                          | 7.92 (Leong-Škornicková <i>et al.</i> , 2007) | <i>Bellis</i>                              |
| 546                                                             | <i>Cirsium vulgare</i>                                          | 11.08 (Bureš <i>et al.</i> , 2004)            | <i>Cirsium</i>                             |
| 484                                                             | <i>Clivia miniata</i>                                           | 78.0 (Zonneveld <i>et al.</i> , 2003)         | <i>Clivia</i>                              |
| 558                                                             | <i>Epilobium hirsutum</i>                                       | 1.68 (Stehlik <i>et al.</i> , 2007)           | <i>Epilob.</i>                             |
|                                                                 | <i>Glycine max</i>                                              |                                               |                                            |
| 492                                                             | No cultivar given                                               | No value or reference given                   | <i>Glycine</i>                             |
| 518                                                             | No cultivar given                                               | 5.42 (Doležel <i>et al.</i> , 1998)           | <i>Glycine</i>                             |
| 571                                                             | 'Burlison'                                                      | 5.56 (Graham <i>et al.</i> , 1994)            | <i>Glycine</i>                             |
| 478, 575                                                        | 'Ceresia'                                                       | 4.53 (Greilhuber and Obermayer, 1997)         | <i>Glycine</i>                             |
| 515                                                             | 'Cina 5202'                                                     | 5.42 (Doležel <i>et al.</i> , 1998)           | <i>Glycine</i>                             |
| 518                                                             | 'Polanka'                                                       | 5.42 (Doležel <i>et al.</i> , 1998)           | <i>Glycine</i>                             |
| 477, 503, 513, 537, 552, 562, 563, 564, 591                     | 'Polanka'                                                       | 5.00 (Doležel <i>et al.</i> , 1994)           | <i>Glycine</i>                             |
| 616                                                             | <i>Haemanthus albiflos</i>                                      | 152.0 (Zonneveld, 2010)                       | <i>Haem.</i>                               |
| 608                                                             | <i>Lactuca sativa</i> 'British Hilde'                           | 11.0 (Doležalová <i>et al.</i> , 2002)        | <i>Lactuca</i>                             |
| 596                                                             | <i>Lotus japonicus</i> 'Gifu B-129'                             | 1.9 (Cheng and Grant, 1973)                   | <i>Lotus</i>                               |
| 520                                                             | <i>Lupinus angustifolia</i>                                     | 3.78 (Naganowska <i>et al.</i> , 2003)        | <i>Lupinus ang.</i>                        |
| 511                                                             | <i>Lupinus texensis</i>                                         | 4.88 (Price <i>et al.</i> , 2005)             | <i>Lupinus tex.</i>                        |
| 539                                                             | <i>Medicago truncatula</i> 'Jemalong'                           | 1.9 (Arumuganathan and Earle, 1991a)          | <i>Medicago</i>                            |
| s478                                                            | <i>Petroselinum crispum</i>                                     | 9.0 (no reference given)                      | <i>Petroselinum</i>                        |
|                                                                 | <i>Petunia hybrida</i>                                          |                                               |                                            |
| 560, 548                                                        | No cultivar given                                               | 5.7 (Marie and Brown, 1993)                   | <i>Petunia</i>                             |
| 489, 502                                                        | 'PxPC6'                                                         | 5.7 (no reference given)                      | <i>Petunia</i>                             |
| 468, 488, 507, 520, 521, 524, 536, 543, 547, 549, 553, 598, 611 | 'PxPC6'                                                         | 5.7 (Marie and Brown, 1993)                   | <i>Petunia</i>                             |
| 542                                                             | <i>Phleum pratense</i>                                          | 17.84 (Kula <i>et al.</i> , 2006)             | <i>Phleum</i>                              |
|                                                                 | <i>Raphanus sativus</i>                                         |                                               |                                            |
| 518                                                             | No cultivar given                                               | 2.74 (Doležel <i>et al.</i> , 1998)           | <i>Raphanus</i>                            |
| 554                                                             | No cultivar given                                               | 2.76 (Barow and Meister, 2002)                | <i>Raphanus</i>                            |
| 555                                                             | No cultivar given                                               | 2.78 (Doležel <i>et al.</i> , 1998)           | <i>Raphanus</i>                            |
| 492                                                             | convar. <i>sativus</i> . var. <i>sativus</i>                    | No value or reference given                   | <i>Raphanus</i>                            |
| 477, 546, 552, 561                                              | 'Saxa'                                                          | 2.22 (Doležel <i>et al.</i> , 1998)           | <i>Raphanus</i>                            |
| 518                                                             | 'Saxa'                                                          | 2.74 (Doležel <i>et al.</i> , 1998)           | <i>Raphanus</i>                            |
| 575                                                             | 'Saxa'                                                          | 2.11 (Greilhuber pers. comm., 1997)           | <i>Raphanus</i>                            |
| 522, 540                                                        | 'Sparkler'                                                      | 2.2 (Suda, 2002)                              | <i>Raphanus</i>                            |
| 583                                                             | 'Vorán'                                                         | 2.22 (Schmidt-Lebuhn <i>et al.</i> , 2008)    | <i>Raphanus</i>                            |
|                                                                 | <i>Solanum lycopersicum</i> (= <i>Lycopersicon esculentum</i> ) |                                               |                                            |
| 567                                                             | No cultivar given                                               | 3.92 (Doležel <i>et al.</i> , 1992)           | <i>Solan.</i>                              |
| 578                                                             | No cultivar given                                               | 3.92 (no reference given)                     | <i>Solan.</i>                              |
| 603                                                             | No cultivar given                                               | 3.92 (Doležel <i>et al.</i> , 1998)           | <i>Solan.</i>                              |
| 562                                                             | 'Stupické polní tyčkové rané'                                   | 4.22 (Leong-Škornicková <i>et al.</i> , 2007) | <i>Solan.</i>                              |
| 472                                                             | 'Stupické polní tyčkové rané'                                   | 3.92 (Marie and Brown, 1993)                  | <i>Solan.</i>                              |
| 469, 477, 506, 537, 541, 546, 550, 552, 557, 563                | 'Stupické polní tyčkové rané'                                   | 3.92 (Doležel <i>et al.</i> , 1992)           | <i>Solan.</i>                              |
| 587, 589                                                        | 'Stupické'                                                      | 3.92 (Doležel <i>et al.</i> , 1992)           | <i>Solan.</i>                              |
| 544                                                             | 'Gardeners Delight'                                             | 4.10 (Obermayer <i>et al.</i> , 2002)         | <i>Solan.</i>                              |
|                                                                 | <i>Sorghum bicolor</i>                                          |                                               |                                            |
| 577                                                             | 'Pioneer 8695'                                                  | 3.34 (Price <i>et al.</i> , 2005)             | <i>Sorghum</i>                             |
| 511                                                             | 'TX623'                                                         | 3.34 (Johnston <i>et al.</i> , 2005)          | <i>Sorghum</i>                             |
|                                                                 | <i>Trifolium repens</i>                                         |                                               |                                            |
| 479                                                             | No cultivar given                                               | 4.14 (Arumuganathan and Earle, 1991a)         | <i>Trifolium</i>                           |
| 512, 534                                                        | 'Milo'                                                          | 4.14 (Arumuganathan and Earle, 1991a)         | <i>Trifolium</i>                           |

difficult to allocate *Luzula* species with high chromosome numbers to any ploidy level with certainty.

(v) A regression of the nuclear fluorescence of several species versus DNA amount was used to estimate DNA amounts in the species studied. For example, Hendrix and Stewart (2005, reference 471) obtained a regression of the nuclear fluorescence of *Hordeum vulgare* 'Sultan' (4C = 22.24 pg), *Zea mays* 'W64A' (4C = 10.94 pg) and *Oryza*

*sativa* 'IR36' (4C = 2.02pg) versus nuclear DNA content, and used this to estimate the DNA C-values of 37 *Gossypium* species.

(w) The standard species used to convert arbitrary units into absolute DNA amounts is unclear to the present authors.

(x) The DNA value given for this species in the original reference differs considerably (i.e. >100 %) from that given

in other original references cited in previous compiled lists of DNA amounts (i.e. Bennett and Smith, 1976, 1991; Bennett *et al.*, 1982, 2000; Bennett and Leitch, 1995, 1997, 2005a). The reason(s) for this is unknown. This C-value should therefore be used with caution until the question is resolved.

(y) The specific status of the material available for study is unclear. The data are included as information on DNA amounts for this genus is relatively sparse, so an indication of genome size in the genus may be useful.

(z) The DNA ploidy and/or chromosome number was assumed by the authors of the original reference based on the DNA amount, i.e. no chromosome counts were made of the material studied.

(aa) Traditionally, *Atriplex halimus* has been divided into two subspecies (subsp. *halimus* and *schweinfurthii*) based on differences in morphology (i.e. habit, size, leaf shape and fruit morphology). Based on cytological and genome size analysis of 20 populations of *A. halimus* by Walker *et al.* (2005) (reference 469) both diploid and tetraploid cytotypes were found. All populations identified as subsp. *halimus* were shown to be diploid whereas those identified as subsp. *schweinfurthii* were tetraploids. Individuals with intermediate morphology were shown to be tetraploid. The Appendix table gives the DNA amounts found in the diploid and tetraploid cytotypes and attributes them to the appropriate subspecies.

(ab) DNA C-values for 12 of the 13 species of *Cirsium* studied by Bureš *et al.* (2004, reference 472) were measured using the fluorochrome propidium iodide (PI). However, for *Cirsium spinosissimum* the DNA amount was estimated using DAPI and the value was calculated from the staining ratio obtained with *C. vulgare* ( $4C = 11.1$  pg). Bureš *et al.* (2004) also included C-values for 12 natural hybrids. Our compiled lists have usually been restricted to C-values for species, and thus data for these hybrids are excluded from the Appendix.

(ac) Schmuths *et al.* (2004) (reference 494) obtained a  $1Cx$ -value (0.206 pg) for *Arabidopsis thaliana* ‘Columbia’ 26% higher than the value of 0.163 pg for the same material compared with the completely sequenced genome of *Caenorhabditis elegans* as calibration standard (Bennett *et al.*, 2003). The difference arises because Schmuths *et al.* (2004) used *Raphanus sativus* as an internal calibration standard with a  $2C$ -value of 1.38 pg which they reported had been taken from Doležal *et al.* (1998) rather than the more widely used C-value estimate for *Raphanus sativus* ‘Saxa’ of  $2C = 1.11$  pg (Doležal *et al.*, 1992) – a difference of +24.3%. [Actually the values cited by Doležal *et al.* (1998) were  $2C = 1.22$  or  $1.26$  pg depending on whether *Allium cepa* or *Pisum sativum* were used as the primary standard.] Had Schmuths *et al.* (2004) used a  $2C$ -value of 1.11 pg their estimate for *A. thaliana* ‘Columbia’ would have been 0.166 pg, and within 2% of the prime C-value estimate for *A. thaliana*.

(ad) Since publication of the paper by Albach and Greilhuber (2004, reference 478), two nomenclature mistakes have been corrected by D. C. Albach (Carl von Ossietzky-Universität Oldenburg, Germany, pers. comm.). *Veronica insularis* has now been corrected to *V. nakaiana* Ohwi and *V. propinqua* has been corrected to *V. vendettadeae* Albach.

(ae) Amsellem *et al.* (2001, reference 493) conducted a population survey of the invasive *Rubus alceifolius* to analyse the distribution of ploidy levels. One population from Lang Son in Vietnam was analysed in detail including multiple chromosome counts and genome size measurements using flow cytometry and internal standardization. They then used this population to screen other individuals for ploidy level using external standardization. Based on genome size data all populations were considered to be tetraploid except for a triploid population from Cuc Phuong (Vietnam). Although the data in table 1 of their paper present a range of genome sizes for the different populations studied, as these were estimated using external standardization only the genome size estimates from the Lang Son and Cuc Phuong populations are given in the present Appendix table.

(af) Vilhar *et al.* (2002, reference 497) estimated genome sizes in 55 accessions of *Dactylis glomerata* subsp. *glomerata* from five populations growing at different altitudes in Slovenia. Although intraspecific variation in DNA amount was reported, the authors were unsure if it was biologically meaningful or due to technical noise. Consequently, only the mean  $2C$  DNA amount given in Table 1 of Vilhar *et al.* (2002) is listed in the Appendix table.

(ag) Although Ohri *et al.* (2004, reference 501) report genome size estimates for 112 species of tropical hardwoods, data for only 57 species are listed in the present Appendix table as C-values for the remaining species were previously communicated to the first author as a personal communication in 2002 (reference 454) or published in Ohri and Kumar (1986, reference 185) and already listed respectively in Bennett and Leitch (2005a) or Bennett and Leitch (1995).

(ah) The paper by Chase *et al.* (2005, reference 504) contains genome size data for 54 species belonging to the subtribe Oncidiinae (Orchidaceae). However, many of the data have been listed previously in the sixth compilation of Bennett *et al.* (2000) under the original reference number of 377. Thus, only 13 estimates not previously listed are included in the Appendix table.

(ai) Grundt *et al.* (2005, reference 505) estimated the genome size of *Draba* species using Feulgen combined with computer image analysis. Due to a paucity and quality of the root material available for analysis some of the results were noted to be ‘extremely deviant’. Consequently, in table 3 of Grundt *et al.* (2005) absolute DNA amounts were calculated once the outlying values had been removed (their column labelled ‘Absolute DNA content with correction’). It is these data that are entered into the present Appendix table.

(aj) To analyse the genetic stability following somatic embryogenesis of *Eucalyptus globulus*, Pinto *et al.* (2004, reference 506) estimated the DNA amount in zygotic embryos, somatic embryos, *in vitro*-germinated plantlets and leaves of field-grown plants. The present Appendix table gives just the DNA amounts for the field-grown plants, in keeping with previous lists which have generally excluded data for *in vitro* propagated material.

(ak) Dart *et al.* (2004, reference 508) estimated the ploidy levels in *Arabidopsis lyrata* using flow cytometry. However, instead of using an animal or plant species as the calibration standard to convert relative fluorescence into absolute DNA amounts they used  $2 \mu\text{m}$  fluorescent beads which were

added to the plant sample after chopping. Prior to running their plant samples Dart *et al.* (2004) calibrated the position of the beads by preparing a combined sample with *Epilobium hirsutum* with an assumed 2C DNA content of 0.87 pg. Based on the relative positions of the beads and *E. hirsutum* the peak position of the beads was assumed to correspond to a DNA content of 1.5 pg. Although this method is likely to give an approximation of the DNA content of *A. lyrata*, such an approach is strongly discouraged because the use of fluorescent beads will (1) not alert the user to potential problems caused by secondary metabolites which can interfere with the binding of propidium iodide to the DNA (e.g. Noiro *et al.*, 2000; Loureiro *et al.*, 2006b; Bennett *et al.*, 2008) and (2) not monitor changes in DNA fluorochrome concentration. Both problems are likely to lead to errors in genome size estimation.

(al) Nuclear DNA contents of six populations of *Bituminaria bituminosa* were analysed in three separate months by Walker *et al.* (2006, reference 513). Genuine intraspecific variation was reported between the different populations and thus the Appendix table lists the highest and lowest mean values across the populations measured in December and April. Values estimated in August were not, however, taken into consideration as they were shown to be significantly lower (3.6–7.4%) due to the inhibitory effects of the furanocoumarins angelicin and psoralen. These compounds, which are known to accumulate to a greater extent at higher temperatures, can effect DNA estimations by causing damage in two ways: (1) following activation by UV light, they can interact directly with the DNA, leading to chromosome aberrations, and (2) they can oxidize phenolic compounds, leading to the production of free radicals which can also damage DNA (Walker *et al.*, 2006).

(am) Obermayer and Greilhuber (2006, reference 530) measured DNA amounts in six species of *Vinca* using both flow cytometry and Feulgen microdensitometry. However, they considered that the estimates by the latter method were more accurate and thus only these values are entered into the Appendix table.

(an) Since Weiss-Schneeweiss *et al.* (2005, reference 531) was published there have been several nomenclature changes in Orobanchaceae. Based on molecular data (Carlón *et al.*, 2008) the genus *Phelipanche* has been recircumscribed and thus 15 taxa that were listed by Weiss-Schneeweiss *et al.* (2005) as belonging to section *Trionychon* of *Orobanche* have been moved to the genus *Phelipanche*. Further, three additional taxa originally included in *Orobanche* section *Myzorrhiza* (*O. californica* subsp. *californica*, *O. californica* subsp. *grandis* and *O. pinorum*) have been moved to their own genus *Myzorrhiza*.

In addition, corrections are made to two specimens that were incorrectly identified in Weiss-Schneeweiss *et al.* (2005) (H. Weiss-Schneeweiss, University of Vienna, Austria, pers. comm.). Thus, *Orobanche rosarina* has been corrected to *P. olbiensis* and *O. foetida* has been corrected to *O. densiflora*. These new names are listed in the Appendix table.

(ao) Zonneveld and Duncan (2006, reference 532) listed DNA amounts for 81 accessions of *Nerine* corresponding to 23 species. For many species intraspecific variation was

reported and the possibility that this was due to B chromosomes was raised. However, no chromosome counts were made so this could not be verified.

(ap) Lafuma *et al.* (2003, reference 539) report genome sizes for 66 southern African and 21 European populations of *Senecio inaequidens* (*sensu lato*, *s.l.*), a complex which includes *S. inaequidens*, *S. harveianus* and *S. madagascariensis*. However, the authors note it is very difficult to distinguish the three species morphologically. Consequently, the Appendix table just lists the largest and smallest genome sizes encountered in this complex for each ploidy level.

(aq) Kochjarová *et al.* (2006, reference 546) analysed several populations of *Cochlearia pyrenaica* from the Carpathian mountains and found only limited intraspecific variation in DNA amount. They attributed this to aneuploidy, although no chromosome counts were made. However, a population collected in the Ukraine (listed as *C. pyrenaica s.l.*) had 1.18-fold more DNA and larger chromosomes than the Carpathian populations (listed as *C. pyrenaica* DC.). The taxonomic position of this Ukrainian population is currently unclear and may need to be revised in light of the genome and karyotype information.

(ar) Noiro *et al.* (2003, reference 560) analysed genome size diversity in 16 diploid *Coffea* species and several additional *Coffea* plants whose specific status was unclear. Although it is not the usual practice to include DNA amounts from uncharacterized species in DNA compilations, one of the unidentified plants listed as *Coffea* sp. ‘Moloundou’ in Noiro *et al.* (2003) was subsequently identified as *Coffea anthonyi* (M. Noiro, Université de la Reunion, France, pers. comm.; Stoffelen *et al.*, 2009). Thus, the DNA amount for this species is included in the Appendix table.

(as) Rossi *et al.* (2008, reference 578) analysed ten populations of *Psychotria ipecacuanha* from the Amazon and Atlantic rain forests of Brazil. Nine populations had similar DNA amounts (mean 2C = 2.05 pg). However, one population from Mozar (Amazon rain forest) was found to have significantly less DNA (i.e. 2C = 1.24 pg). When combined samples were run on a flow cytometer two distinct peaks were observed, ruling out the possibility that the differences in genome size were technical. However, although chromosome counts from three populations with the higher DNA amount were shown to be  $2n = 22$  no chromosome counts could be prepared from the Mozar population so the source of the DNA variation is currently unclear.

(at) In the paper by Temsch *et al.* (2008, reference 597)  $2n = 32$  is reported to be the lowest chromosome number in *Dahlia*. Some authors have considered species with such a chromosome count to be diploid (e.g. Sørensen, 1969) while others have proposed that they are allotetraploid (e.g. Lawrence, 1929). This issue was resolved by Gatt *et al.* (1999) who used meiotic chromosome pairing and genomic *in situ* hybridization to show that species with  $2n = 32$  were generatively tetraploid with a basic chromosome number of  $x = 8$ . Based on these observations, species with  $2n = 32$ , 34 and 36 are considered tetraploid while those with  $2n = 64$  are octoploid. These ploidy levels have been used in the Appendix table.



(au) Huff and Palazzo (1998, reference 609) estimated the DNA amounts for ten fine fescue species (*Festuca*) and presented the results in their table 3. However, due to a formatting error of the table only nine species are listed although ten DNA amounts are given. Following discussions with D. R. Huff (Pennsylvania State University, USA, pers. comm.) the line of data labelled as 14 chromosomes with a 2C DNA content of 5.35 pg actually refers to the DNA amount for the Tundra fescue *F. lenensis*. All other species and DNA amounts are correctly aligned.

(av) In reference 610 Boyko *et al.* (1984) list DNA amounts for two *xTriticale* lines in arbitrary units (a.u.). In addition, they also measured *Triticum aestivum* 'Chaika' to be 110.3 a.u. To convert arbitrary units into absolute DNA amounts a conversion factor of 1 a.u. = 0.63 was used. This factor was obtained from the ratio of the 4C value of *T. aestivum* given in Table 5 (i.e. 4C = 69.3 pg) and the estimate of *T. aestivum* 'Chaika' of 110.3 a.u. given in the table in Boyko *et al.* (1984).

(aw) Panda *et al.* (2007, reference 558) estimated the genome size in three morphotypes of *Pandanus fascicularis* (spinous, spineless and *ketaki*). All three showed clear

differences in DNA amount with the *ketaki* type having significantly ( $P \leq 0.05$ ) more DNA (1C = 2.6 pg) than the spinous (1C = 1.5 pg) or spineless (1C = 1.9 pg) types. Although all three morphotypes possessed the same chromosome numbers ( $2n = 60$ ), phytochemical and phylogenetic analyses [using random amplification of polymorphic DNA (RAPD) markers] also identified differences, with the RAPD analysis dividing them into (1) the spinous and spineless types and (2) the *ketaki* type. Based on these results, Panda *et al.* (2007) suggested that the '...the *ketaki* morphotype deserves the status of a subspecies or variety, if not a species'. As further work is needed to confirm this the current Appendix table lists the three morphotypes as one species. However, the possibility that this might change in the future should be recognized.

(ax) Halkka (1964, reference 576) used meiotic material of four *Luzula* species to estimate genome sizes in arbitrary units (a.u.). To convert the 2C values given in table 2 by Halkka (1964) into absolute DNA amounts a conversion factor of 0.31 was used. This was obtained as the ratio of the estimate for *Luzula sudetica* given by Halkka of 2.94 a.u. and by Bacic *et al.* (2007, reference 572) (i.e. 2C = 0.91 pg listed as species 1390a in the Appendix table).

| Entry number <sup>g</sup> | Species                                                                                               | Voucher          | Family                   | Higher group <sup>#</sup> | 2n <sup>‡</sup>           | Ploidy level (x) | Life cycle type <sup>§</sup> | DNA amount             |         |         |         | Original ref. <sup>a</sup> | Present amount <sup>†</sup> | Standard species <sup>*b1</sup> | Method <sup>††</sup> |
|---------------------------|-------------------------------------------------------------------------------------------------------|------------------|--------------------------|---------------------------|---------------------------|------------------|------------------------------|------------------------|---------|---------|---------|----------------------------|-----------------------------|---------------------------------|----------------------|
|                           |                                                                                                       |                  |                          |                           |                           |                  |                              | 1C (Mbp <sup>o</sup> ) | 1C (pg) | 2C (pg) | 4C (pg) |                            |                             |                                 |                      |
| 1a                        | <i>Acacia colletioides</i> <sup>1</sup>                                                               | – <sup>m</sup>   | Fabaceae <sup>j</sup>    | E                         | – <sup>n</sup>            | – <sup>p</sup>   | P                            | 748                    | 0.8     | 1.5     | 3.1     | 526                        | O                           | A                               | FC:PI                |
| 2a                        | <i>Acacia doratoxylon</i> <sup>1</sup>                                                                | – <sup>m</sup>   | Fabaceae <sup>j</sup>    | E                         | – <sup>n</sup>            | – <sup>p</sup>   | P                            | 792                    | 0.8     | 1.6     | 3.2     | 526                        | O                           | A                               | FC:PI                |
| 3a                        | <i>Acacia floribunda</i> (Vent.) Willd.                                                               | – <sup>m</sup>   | Fabaceae <sup>j</sup>    | E                         | – <sup>n</sup>            | – <sup>p</sup>   | P                            | 939                    | 1.0     | 1.9     | 3.8     | 526                        | O                           | A                               | FC:PI                |
| 4a                        | <i>Acacia oswaldii</i> F.Muell.                                                                       | – <sup>m</sup>   | Fabaceae <sup>j</sup>    | E                         | – <sup>n</sup>            | – <sup>p</sup>   | P                            | 895                    | 0.9     | 1.8     | 3.7     | 526                        | O                           | A                               | FC:PI                |
| 5a                        | <i>Acacia suaveolens</i> Willd.                                                                       | – <sup>m</sup>   | Fabaceae <sup>j</sup>    | E                         | – <sup>n</sup>            | – <sup>p</sup>   | P                            | 880                    | 0.9     | 1.8     | 3.6     | 526                        | O                           | A                               | FC:PI                |
| 6a                        | <i>Acacia wilhelmiana</i> F.Muell.                                                                    | – <sup>m</sup>   | Fabaceae <sup>j</sup>    | E                         | – <sup>n</sup>            | – <sup>p</sup>   | P                            | 792                    | 0.8     | 1.6     | 3.2     | 526                        | O                           | A                               | FC:PI                |
| 7a                        | <i>Acantholepis orientalis</i> Less.                                                                  | Yes              | Asteraceae <sup>j</sup>  | E                         | 14                        | 2                | A                            | 3,188                  | 3.3     | 6.5     | 13.0    | 502                        | O                           | F <sup>b2</sup>                 | FC:PI                |
| 8a                        | <i>Acer negundo</i> L.                                                                                | No               | Sapindaceae              | E                         | – <sup>n</sup>            | – <sup>p</sup>   | P                            | 523                    | 0.5     | 1.1     | 2.1     | 563                        | O                           | <i>Solan.</i> <sup>c</sup>      | FC:PI                |
| 9d                        | <i>Acer pseudoplatanus</i> L. <sup>i</sup>                                                            | Yes              | Sapindaceae <sup>k</sup> | E                         | – <sup>n</sup>            | – <sup>p</sup>   | P                            | 601                    | 0.6     | 1.2     | 2.5     | 489                        | O                           | – <sup>w</sup>                  | FC:EB                |
| 9e                        | <i>Acer pseudoplatanus</i> L. <sup>i</sup>                                                            | Yes              | Sapindaceae <sup>k</sup> | E                         | – <sup>n</sup>            | – <sup>p</sup>   | P                            | 797                    | 0.8     | 1.6     | 3.3     | 489                        | O                           | – <sup>w</sup>                  | FC:EB                |
| 10a                       | <i>Achnatherum petriei</i> (Buchanan) S.W.L.Jacobs & J.Everett                                        | Yes              | Poaceae <sup>l</sup>     | M                         | 42                        | 6                | P                            | 866                    | 0.9     | 1.8     | 3.5     | 528                        | O                           | – <sup>w</sup>                  | FC:PI                |
| 11b                       | <i>Actinidia deliciosa</i> (A.Chev.) C.F.Liang & A.R.Ferguson                                         | No               | Actinidiaceae            | E                         | – <sup>n</sup>            | – <sup>p</sup>   | P                            | 2,347                  | 2.4     | 4.8     | 9.6     | 563                        | O                           | G <sup>c</sup>                  | FC:PI                |
| 12a                       | <i>Adenocarpus foliolosus</i> (Aiton) DC.                                                             | – <sup>m</sup>   | Fabaceae <sup>j</sup>    | E                         | 52 <sup>o</sup>           | 4                | P                            | 875                    | 0.9     | 1.8     | 3.6     | 552                        | O                           | <i>Glycine</i> <sup>e</sup>     | FC:PI                |
| 13a                       | <i>Adenocarpus viscosus</i> (Willd.) Webb & Berthel. subsp. <i>spartioides</i> Rivas-Mart. & Belmonte | – <sup>m</sup>   | Fabaceae <sup>j</sup>    | E                         | c. 46, c. 48 <sup>o</sup> | 4                | P                            | 826                    | 0.8     | 1.7     | 3.4     | 552                        | O                           | <i>Glycine</i> <sup>e</sup>     | FC:PI                |
| 14c                       | <i>Aegilops bicornis</i> (Forssk.) Jaub. & Spach                                                      | No <sup>m1</sup> | Poaceae <sup>j</sup>     | M                         | 14                        | 2                | A                            | 6,690                  | 6.8     | 13.7    | 27.4    | 605                        | O                           | F-2118p                         | FC:PI                |
| 15b                       | <i>Aegilops biuncialis</i> Vis.                                                                       | No <sup>m1</sup> | Poaceae <sup>j</sup>     | M                         | 28                        | 4                | A                            | 10,142                 | 10.4    | 20.7    | 41.5    | 604                        | O                           | F <sup>c</sup>                  | FC:PI                |
| 16b                       | <i>Aegilops caudata</i> L.                                                                            | No <sup>m1</sup> | Poaceae <sup>j</sup>     | M                         | 14                        | 2                | A                            | 4,734                  | 4.8     | 9.7     | 19.4    | 605                        | O                           | F-2118p                         | FC:PI                |
| 17b                       | <i>Aegilops columnaris</i> Zhuk.                                                                      | No <sup>m1</sup> | Poaceae <sup>j</sup>     | M                         | 28                        | 4                | A                            | 10,621                 | 10.9    | 21.7    | 43.4    | 604                        | O                           | F <sup>c</sup>                  | FC:PI                |
| 18b                       | <i>Aegilops comosa</i> subsp. <i>eucomosa</i> and <i>heldrieichii</i> Sm. in Sibth. & Sm.             | No <sup>m1</sup> | Poaceae <sup>j</sup>     | M                         | 14                        | 2                | A                            | 5,408                  | 5.5     | 11.1    | 22.1    | 605                        | O                           | F-2118p                         | FC:PI                |
| 19b                       | <i>Aegilops crassa</i> Boiss.                                                                         | No <sup>m1</sup> | Poaceae <sup>j</sup>     | M                         | 28                        | 4                | A                            | 10,621                 | 10.9    | 21.7    | 43.4    | 604                        | O                           | F <sup>c</sup>                  | FC:PI                |
| 20b                       | <i>Aegilops cylindrica</i> Host                                                                       | No <sup>m1</sup> | Poaceae <sup>j</sup>     | M                         | 28                        | 4                | A                            | 9,379                  | 9.6     | 19.2    | 38.4    | 604                        | O                           | F <sup>c</sup>                  | FC:PI                |
| 21a                       | <i>Aegilops geniculata</i> Roth                                                                       | No <sup>m1</sup> | Poaceae <sup>j</sup>     | M                         | 28                        | 4                | A                            | 10,064                 | 10.3    | 20.6    | 41.2    | 604                        | O                           | F <sup>c</sup>                  | FC:PI                |
| 22b                       | <i>Aegilops kotschy</i> Boiss.                                                                        | No <sup>m1</sup> | Poaceae <sup>j</sup>     | M                         | 28                        | 4                | A                            | 12,362                 | 12.6    | 25.3    | 50.6    | 604                        | O                           | F <sup>c</sup>                  | FC:PI                |
| 23d                       | <i>Aegilops longissima</i> Schweinf. & Muschl.                                                        | No <sup>m1</sup> | Poaceae <sup>j</sup>     | M                         | 14                        | 2                | A                            | 7,315                  | 7.5     | 15.0    | 29.9    | 605                        | O                           | F-2118p                         | FC:PI                |
| 23e                       | <i>Aegilops longissima</i> Schweinf. & Muschl.                                                        | No               | Poaceae <sup>j</sup>     | M                         | 14                        | 2                | A                            | 7,017                  | 7.2     | 14.4    | 28.7    | 519                        | O                           | – <sup>w</sup>                  | FC:PI                |
| 24a                       | <i>Aegilops neglecta</i> Req. ex Bertol.                                                              | No <sup>m1</sup> | Poaceae <sup>j</sup>     | M                         | 28                        | 4                | A                            | 10,406                 | 10.6    | 21.3    | 42.6    | 604                        | O                           | F <sup>c</sup>                  | FC:PI                |

|     |                                                               |                  |                           |   |     |   |                |        |      |      |      |     |   |                            |       |
|-----|---------------------------------------------------------------|------------------|---------------------------|---|-----|---|----------------|--------|------|------|------|-----|---|----------------------------|-------|
| 25a | <i>Aegilops peregrina</i> Maire & Weiller                     | No <sup>m1</sup> | Poaceae <sup>j</sup>      | M | 28  | 4 | A              | 12,245 | 12.5 | 25.0 | 50.1 | 604 | O | F <sup>c</sup>             | FC:PI |
| 26a | <i>Aegilops recta</i> Chennav.                                | No <sup>m1</sup> | Poaceae <sup>j</sup>      | M | 42  | 6 | A              | 15,863 | 16.2 | 32.4 | 64.9 | 604 | O | F <sup>c</sup>             | FC:PI |
| 27b | <i>Aegilops searsii</i> Feldman & Kislev ex Hammer            | No <sup>m1</sup> | Poaceae <sup>j</sup>      | M | 14  | 2 | A              | 6,504  | 6.7  | 13.3 | 26.6 | 605 | O | F-2118p                    | FC:PI |
| 28c | <i>Aegilops sharonensis</i> Eig                               | No               | Poaceae <sup>j</sup>      | M | 14  | 2 | A              | 7,164  | 7.3  | 14.7 | 29.3 | 519 | O | – <sup>w</sup>             | FC:PI |
| 28d | <i>Aegilops sharonensis</i> Eig                               | No <sup>m1</sup> | Poaceae <sup>j</sup>      | M | 14  | 2 | A              | 7,355  | 7.5  | 15.0 | 30.1 | 605 | O | F-2118p                    | FC:PI |
| 29d | <i>Aegilops speltoides</i> Tausch                             | No <sup>m1</sup> | Poaceae <sup>j</sup>      | M | 14  | 2 | A              | 5,682  | 5.8  | 11.6 | 23.2 | 605 | O | F-2118p                    | FC:PI |
| 30e | <i>Aegilops tauschii</i> (= <i>Aegilops squarrosa</i> ) Coss. | No               | Poaceae <sup>j</sup>      | M | 14  | 2 | A              | 4,968  | 5.1  | 10.2 | 20.3 | 519 | O | – <sup>w</sup>             | FC:PI |
| 30f | <i>Aegilops tauschii</i> (= <i>Aegilops squarrosa</i> ) Coss. | No <sup>m1</sup> | Poaceae <sup>j</sup>      | M | 14  | 2 | A              | 5,056  | 5.2  | 10.3 | 20.7 | 605 | O | F-2118p                    | FC:PI |
| 31f | <i>Aegilops triuncialis</i> L.                                | No <sup>m1</sup> | Poaceae <sup>j</sup>      | M | 28  | 4 | A              | 9,712  | 9.9  | 19.9 | 39.7 | 604 | O | F <sup>c</sup>             | FC:PI |
| 32b | <i>Aegilops umbellulata</i> Zhuk.                             | No <sup>m1</sup> | Poaceae <sup>j</sup>      | M | 14  | 2 | A              | 5,262  | 5.4  | 10.8 | 21.5 | 605 | O | F-2118p                    | FC:PI |
| 32c | <i>Aegilops umbellulata</i> Zhuk.                             | No               | Poaceae <sup>j</sup>      | M | 14  | 2 | A              | 5,315  | 5.4  | 10.9 | 21.7 | 519 | O | – <sup>w</sup>             | FC:PI |
| 33b | <i>Aegilops uniaristata</i> Vis.                              | No <sup>m1</sup> | Poaceae <sup>j</sup>      | M | 14  | 2 | A              | 5,692  | 5.8  | 11.6 | 23.3 | 605 | O | F-2118p                    | FC:PI |
| 34b | <i>Aegilops vavilovii</i> (Zhuk.) Chennav.                    | No <sup>m1</sup> | Poaceae <sup>j</sup>      | M | 42  | 6 | A              | 16,753 | 17.1 | 34.3 | 68.5 | 604 | O | F <sup>c</sup>             | FC:PI |
| 35b | <i>Aegilops ventricosa</i> Tausch                             | No <sup>m1</sup> | Poaceae <sup>j</sup>      | M | 28  | 4 | A              | 10,406 | 10.6 | 21.3 | 42.6 | 604 | O | F <sup>c</sup>             | FC:PI |
| 36a | <i>Aeonium canariense</i> (L.) Webb & Berthel.                | – <sup>m</sup>   | Crassulaceae              | E | 36° | 4 | A              | 528    | 0.5  | 1.1  | 2.2  | 552 | O | <i>Solan.</i> <sup>c</sup> | FC:PI |
| 37a | <i>Aeonium ciliatum</i> (Willd.) Webb & Berthel.              | – <sup>m</sup>   | Crassulaceae              | E | 36° | 4 | P              | 499    | 0.5  | 1.0  | 2.0  | 552 | O | <i>Solan.</i> <sup>c</sup> | FC:PI |
| 38a | <i>Aeonium goochiae</i> (Webb & Berthel.) Webb & Berthel.     | – <sup>m</sup>   | Crassulaceae              | E | 36° | 4 | P              | 616    | 0.6  | 1.3  | 2.5  | 552 | O | <i>Solan.</i> <sup>c</sup> | FC:PI |
| 39a | <i>Aeonium holochrysum</i> Webb & Berthel.                    | – <sup>m</sup>   | Crassulaceae              | E | 36° | 4 | P              | 597    | 0.6  | 1.2  | 2.4  | 552 | O | <i>Solan.</i> <sup>c</sup> | FC:PI |
| 40a | <i>Aeonium lindleyi</i> Webb & Berthel.                       | – <sup>m</sup>   | Crassulaceae              | E | 36° | 4 | P              | 665    | 0.7  | 1.4  | 2.7  | 552 | O | <i>Solan.</i> <sup>c</sup> | FC:PI |
| 41a | <i>Aeonium palmense</i> Webb ex Christ                        | – <sup>m</sup>   | Crassulaceae              | E | 36° | 4 | P              | 548    | 0.6  | 1.1  | 2.2  | 552 | O | <i>Solan.</i> <sup>c</sup> | FC:PI |
| 42a | <i>Aeonium sedifolium</i> (Webb ex Bolle) Pit. & Proust       | – <sup>m</sup>   | Crassulaceae              | E | 36° | 4 | P              | 660    | 0.7  | 1.4  | 2.7  | 552 | O | <i>Solan.</i> <sup>c</sup> | FC:PI |
| 43a | <i>Aeonium smithii</i> (Sims) Webb & Berthel.                 | – <sup>m</sup>   | Crassulaceae              | E | 36° | 4 | P              | 504    | 0.5  | 1.0  | 2.1  | 552 | O | <i>Solan.</i> <sup>c</sup> | FC:PI |
| 44a | <i>Aeonium spathulatum</i> (Hornem.) Praeger                  | – <sup>m</sup>   | Crassulaceae              | E | 36° | 4 | P              | 538    | 0.6  | 1.1  | 2.2  | 552 | O | <i>Solan.</i> <sup>c</sup> | FC:PI |
| 45a | <i>Aeonium tabulaeforme</i> (Haw.) Webb & Berthel.            | – <sup>m</sup>   | Crassulaceae              | E | 36° | 4 | P              | 548    | 0.6  | 1.1  | 2.2  | 552 | O | <i>Solan.</i> <sup>c</sup> | FC:PI |
| 46a | <i>Aeonium urbicum</i> (C. Sm. ex Buch) Webb & Berthel.       | – <sup>m</sup>   | Crassulaceae              | E | 36° | 4 | P              | 518    | 0.5  | 1.1  | 2.1  | 552 | O | <i>Solan.</i> <sup>c</sup> | FC:PI |
| 47a | <i>Aethionema grandiflorum</i> Boiss. & Hohen.                | Yes              | Brassicaceae <sup>j</sup> | E | 24° | 2 | – <sup>q</sup> | 694    | 0.7  | 1.4  | 2.8  | 599 | O | L                          | FC:PI |
| 48a | <i>Aethionema schistosum</i> Boiss. & Kotschy                 | Yes              | Brassicaceae <sup>j</sup> | E | 48  | 4 | – <sup>q</sup> | 694    | 0.7  | 1.4  | 2.8  | 599 | O | L                          | FC:PI |

| Entry number <sup>e</sup> | Species                                                                        | Voucher | Family                      | Higher group <sup>#</sup> | 2n <sup>‡</sup> | Ploidy level (x) | Life cycle type <sup>§</sup> | DNA amount             |                |         |         | Original ref. <sup>a</sup> | Present amount <sup>†</sup> | Standard species <sup>*b1</sup> | Method <sup>††</sup> |
|---------------------------|--------------------------------------------------------------------------------|---------|-----------------------------|---------------------------|-----------------|------------------|------------------------------|------------------------|----------------|---------|---------|----------------------------|-----------------------------|---------------------------------|----------------------|
|                           |                                                                                |         |                             |                           |                 |                  |                              | 1C (Mbp <sup>b</sup> ) | 1C (pg)        | 2C (pg) | 4C (pg) |                            |                             |                                 |                      |
| 49a                       | <i>Agapanthus africanus</i> (L.) Hoffmanns. <sup>i</sup>                       | Yes     | Amaryllidaceae <sup>k</sup> | M                         | 30 <sup>o</sup> | 2                | P                            | 15,452                 | 15.8           | 31.6    | 63.2    | 483                        | O                           | <i>Agave</i> sp. <sup>e</sup>   | FC:PI                |
| 49b                       | <i>Agapanthus africanus</i> subsp. <i>walshii</i> (L.) Hoffmanns. <sup>i</sup> | Yes     | Amaryllidaceae <sup>k</sup> | M                         | 30 <sup>o</sup> | 2                | P                            | 15,565                 | 15.9           | 31.8    | 63.7    | 483                        | O                           | <i>Agave</i> sp. <sup>e</sup>   | FC:PI                |
| 50a                       | <i>Agapanthus africanus</i> (L.) Hoffmanns.                                    | Yes     | Amaryllidaceae <sup>k</sup> | M                         | – <sup>n</sup>  | 3                | P                            | – <sup>t</sup>         | – <sup>t</sup> | 47.6    | 95.1    | 483                        | O                           | <i>Agave</i> sp. <sup>e</sup>   | FC:PI                |
| 51a                       | <i>Agapanthus campanulatus</i> Leighton subsp. <i>patens</i> <sup>i</sup>      | Yes     | Amaryllidaceae <sup>k</sup> | M                         | 30 <sup>o</sup> | 2                | P                            | 10,978                 | 11.2           | 22.5    | 44.9    | 483                        | O                           | <i>Agave</i> sp. <sup>e</sup>   | FC:PI                |
| 51b                       | <i>Agapanthus campanulatus</i> Leighton <sup>i</sup>                           | Yes     | Amaryllidaceae <sup>k</sup> | M                         | 30 <sup>o</sup> | 2                | P                            | 11,125                 | 11.4           | 22.8    | 45.5    | 483                        | O                           | <i>Agave</i> sp. <sup>e</sup>   | FC:PI                |
| 52a                       | <i>Agapanthus caulescens</i> Sprenger <sup>i</sup>                             | Yes     | Amaryllidaceae <sup>k</sup> | M                         | 30 <sup>o</sup> | 2                | P                            | 11,433                 | 11.7           | 23.4    | 46.8    | 483                        | O                           | <i>Agave</i> sp. <sup>e</sup>   | FC:PI                |
| 52b                       | <i>Agapanthus caulescens</i> Sprenger subsp. <i>angustifolius</i> <sup>i</sup> | Yes     | Amaryllidaceae <sup>k</sup> | M                         | 30 <sup>o</sup> | 2                | P                            | 11,447                 | 11.7           | 23.4    | 46.8    | 483                        | O                           | <i>Agave</i> sp. <sup>e</sup>   | FC:PI                |
| 53a                       | <i>Agapanthus coddii</i> Leighton <sup>i</sup>                                 | Yes     | Amaryllidaceae <sup>k</sup> | M                         | 30 <sup>o</sup> | 2                | P                            | 11,834                 | 12.1           | 24.2    | 48.4    | 483                        | O                           | <i>Agave</i> sp. <sup>e</sup>   | FC:PI                |
| 54a                       | <i>Agapanthus inapertus</i> Beauv. subsp. <i>hollandii</i> cv. Sky             | Yes     | Amaryllidaceae <sup>k</sup> | M                         | 30 <sup>o</sup> | 2                | P                            | 12,289                 | 12.6           | 25.1    | 50.3    | 483                        | O                           | <i>Agave</i> sp. <sup>e</sup>   | FC:PI                |
| 54b                       | <i>Agapanthus inapertus</i> Beauv. subsp. <i>intermedius</i> <sup>i</sup>      | Yes     | Amaryllidaceae <sup>k</sup> | M                         | 30 <sup>o</sup> | 2                | P                            | 12,308                 | 12.6           | 25.2    | 50.3    | 483                        | O                           | <i>Agave</i> sp. <sup>e</sup>   | FC:PI                |
| 54c                       | <i>Agapanthus inapertus</i> Beauv.                                             | Yes     | Amaryllidaceae <sup>k</sup> | M                         | 30 <sup>o</sup> | 2                | P                            | 12,308                 | 12.6           | 25.2    | 50.3    | 483                        | O                           | <i>Agave</i> sp. <sup>e</sup>   | FC:PI                |
| 54d                       | <i>Agapanthus inapertus</i> Beauv. subsp. <i>parviflorus</i>                   | Yes     | Amaryllidaceae <sup>k</sup> | M                         | 30 <sup>o</sup> | 2                | P                            | 12,323                 | 12.6           | 25.2    | 50.4    | 483                        | O                           | <i>Agave</i> sp. <sup>e</sup>   | FC:PI                |
| 54e                       | <i>Agapanthus inapertus</i> Beauv. subsp. <i>pendulus</i> <sup>i</sup>         | Yes     | Amaryllidaceae <sup>k</sup> | M                         | 30 <sup>o</sup> | 2                | P                            | 12,352                 | 12.6           | 25.3    | 50.5    | 483                        | O                           | <i>Agave</i> sp. <sup>e</sup>   | FC:PI                |
| 54f                       | <i>Agapanthus inapertus</i> Beauv. subsp. <i>inapertus</i> cv. White           | Yes     | Amaryllidaceae <sup>k</sup> | M                         | – <sup>n</sup>  | 3                | P                            | – <sup>t</sup>         | – <sup>t</sup> | 36.6    | 73.2    | 483                        | O                           | <i>Agave</i> sp. <sup>e</sup>   | FC:PI                |
| 55a                       | <i>Agapanthus inapertus</i> Beauv. subsp. <i>inapertus</i>                     | Yes     | Amaryllidaceae <sup>k</sup> | M                         | – <sup>n</sup>  | 3                | P                            | – <sup>t</sup>         | – <sup>t</sup> | 36.8    | 73.5    | 483                        | O                           | <i>Agave</i> sp. <sup>e</sup>   | FC:PI                |
| 55b                       | <i>Agapanthus inapertus</i> Beauv. subsp. <i>intermedius</i>                   | Yes     | Amaryllidaceae <sup>k</sup> | M                         | – <sup>n</sup>  | 3                | P                            | – <sup>t</sup>         | – <sup>t</sup> | 37.4    | 74.9    | 483                        | O                           | <i>Agave</i> sp. <sup>e</sup>   | FC:PI                |
| 55c                       | <i>Agapanthus inapertus</i> Beauv. subsp. <i>pendulus</i>                      | Yes     | Amaryllidaceae <sup>k</sup> | M                         | – <sup>n</sup>  | 3                | P                            | – <sup>t</sup>         | – <sup>t</sup> | 37.4    | 74.9    | 483                        | O                           | <i>Agave</i> sp. <sup>e</sup>   | FC:PI                |
| 56a                       | <i>Agapanthus praecox</i> subsp. <i>praecox</i> <sup>i, 1</sup>                | Yes     | Amaryllidaceae <sup>k</sup> | M                         | 30 <sup>o</sup> | 2                | P                            | 12,401                 | 12.7           | 25.4    | 50.7    | 483                        | O                           | <i>Agave</i> sp. <sup>e</sup>   | FC:PI                |
| 56b                       | <i>Agapanthus praecox</i> cv. Dwarf white <sup>i, 1</sup>                      | Yes     | Amaryllidaceae <sup>k</sup> | M                         | 30 <sup>o</sup> | 2                | P                            | 12,445                 | 12.7           | 25.5    | 50.9    | 483                        | O                           | <i>Agave</i> sp. <sup>e</sup>   | FC:PI                |

|     |                                                                          |     |                             |   |                |                |   |                |                |      |      |     |   |                               |       |
|-----|--------------------------------------------------------------------------|-----|-----------------------------|---|----------------|----------------|---|----------------|----------------|------|------|-----|---|-------------------------------|-------|
| 56c | <i>Agapanthus praecox</i><br>subsp. <i>orientalis</i> <sup>1, 1</sup>    | Yes | Amaryllidaceae <sup>k</sup> | M | 30°            | 2              | P | 12,470         | 12.8           | 25.5 | 51.0 | 483 | O | <i>Agave</i> sp. <sup>e</sup> | FC:PI |
| 56d | <i>Agapanthus praecox</i><br>subsp. <i>minimus</i> <sup>1, 1</sup>       | Yes | Amaryllidaceae <sup>k</sup> | M | 30°            | 2              | P | 12,993         | 13.3           | 26.6 | 53.1 | 483 | O | <i>Agave</i> sp. <sup>e</sup> | FC:PI |
| 57c | <i>Agave americana</i> L. cv.<br>Aureomediopicta                         | No  | Asparagaceae <sup>k</sup>   | M | – <sup>n</sup> | 4              | P | 7,775          | 8.0            | 15.9 | 31.8 | 482 | O | <i>Agave</i> sp. <sup>e</sup> | FC:PI |
| 57d | <i>Agave americana</i> L. cv.<br>Aureomarginata                          | No  | Asparagaceae <sup>k</sup>   | M | – <sup>n</sup> | 4              | P | 7,775          | 8.0            | 15.9 | 31.8 | 482 | O | <i>Agave</i> sp. <sup>e</sup> | FC:PI |
| 57e | <i>Agave americana</i> L. cv.<br>Albomediopicta                          | No  | Asparagaceae <sup>k</sup>   | M | – <sup>n</sup> | 4              | P | 7,775          | 8.0            | 15.9 | 31.8 | 482 | O | <i>Agave</i> sp. <sup>e</sup> | FC:PI |
| 57f | <i>Agave americana</i> L.                                                | No  | Asparagaceae <sup>k</sup>   | M | 120°           | 4              | P | 7,775          | 8.0            | 15.9 | 31.8 | 482 | O | <i>Agave</i> sp. <sup>e</sup> | FC:PI |
| 58a | <i>Agave attenuata</i><br>Salm-Dyck                                      | No  | Asparagaceae <sup>k</sup>   | M | – <sup>n</sup> | 2 <sup>z</sup> | P | 4,059          | 4.2            | 8.3  | 16.6 | 482 | O | <i>Agave</i> sp. <sup>e</sup> | FC:PI |
| 59a | <i>Agave chrysantha</i><br>Peebles                                       | No  | Asparagaceae <sup>k</sup>   | M | 60°            | 2              | P | 4,108          | 4.2            | 8.4  | 16.8 | 482 | O | <i>Agave</i> sp. <sup>e</sup> | FC:PI |
| 60b | <i>Agave filifera</i> Salm-Dyck                                          | No  | Asparagaceae <sup>k</sup>   | M | 60°            | 2 <sup>z</sup> | P | 3,863          | 4.0            | 7.9  | 15.8 | 482 | O | <i>Agave</i> sp. <sup>e</sup> | FC:PI |
| 61a | <i>Agave gigantea</i> Gentry                                             | No  | Asparagaceae <sup>k</sup>   | M | – <sup>n</sup> | 4              | P | 7,775          | 8.0            | 15.9 | 31.8 | 482 | O | <i>Agave</i> sp. <sup>e</sup> | FC:PI |
| 62a | <i>Agave kerchovei</i> Lemaire                                           | No  | Asparagaceae <sup>k</sup>   | M | 120°           | 4              | P | 7,775          | 8.0            | 15.9 | 31.8 | 482 | O | <i>Agave</i> sp. <sup>e</sup> | FC:PI |
| 63b | <i>Agave lechuguilla</i> Torrey                                          | No  | Asparagaceae <sup>k</sup>   | M | 120°           | 4              | P | 7,775          | 8.0            | 15.9 | 31.8 | 482 | O | <i>Agave</i> sp. <sup>e</sup> | FC:PI |
| 64a | <i>Agave margaritae</i><br>Brandegee                                     | No  | Asparagaceae <sup>k</sup>   | M | – <sup>n</sup> | 2              | P | 4,205          | 4.3            | 8.6  | 17.2 | 482 | O | <i>Agave</i> sp. <sup>e</sup> | FC:PI |
| 65a | <i>Agave mckelveyana</i><br>Gentry                                       | No  | Asparagaceae <sup>k</sup>   | M | – <sup>n</sup> | 2              | P | 3,912          | 4.0            | 8.0  | 16.0 | 482 | O | <i>Agave</i> sp. <sup>e</sup> | FC:PI |
| 66a | <i>Agave mitis</i> Mart. var.<br><i>albidior</i> (Salm-Dyck)<br>B.Ulrich | No  | Asparagaceae <sup>k</sup>   | M | 60°            | 2              | P | 4,157          | 4.3            | 8.5  | 17.0 | 482 | O | <i>Agave</i> sp. <sup>e</sup> | FC:PI |
| 67a | <i>Agave neomexicana</i><br>Wooton & Standley                            | No  | Asparagaceae <sup>k</sup>   | M | 120°           | 4              | P | 7,775          | 8.0            | 15.9 | 31.8 | 482 | O | <i>Agave</i> sp. <sup>e</sup> | FC:PI |
| 68b | <i>Agave palmeri</i> Engelm.                                             | No  | Asparagaceae <sup>k</sup>   | M | – <sup>n</sup> | 2              | P | 3,961          | 4.1            | 8.1  | 16.2 | 482 | O | <i>Agave</i> sp. <sup>e</sup> | FC:PI |
| 69a | <i>Agave parryi</i> Engelm.<br>var. <i>parryi</i>                        | No  | Asparagaceae <sup>k</sup>   | M | 60°            | 2              | P | 4,303          | 4.4            | 8.8  | 17.6 | 482 | O | <i>Agave</i> sp. <sup>e</sup> | FC:PI |
| 70a | <i>Agave parryi</i> Engelm.<br>var. <i>parryi</i>                        | No  | Asparagaceae <sup>k</sup>   | M | – <sup>n</sup> | 4              | P | 7,971          | 8.2            | 16.3 | 32.6 | 482 | O | <i>Agave</i> sp. <sup>e</sup> | FC:PI |
| 71a | <i>Agave parryi</i> Engelm.<br>var. <i>couesii</i>                       | No  | Asparagaceae <sup>k</sup>   | M | – <sup>n</sup> | 6              | P | 11,736         | 12.0           | 24.0 | 48.0 | 482 | O | <i>Agave</i> sp. <sup>e</sup> | FC:PI |
| 71b | <i>Agave parryi</i> Engelm.<br>var. <i>truncata</i>                      | No  | Asparagaceae <sup>k</sup>   | M | – <sup>n</sup> | 6              | P | 12,470         | 12.8           | 25.5 | 51.0 | 482 | O | <i>Agave</i> sp. <sup>e</sup> | FC:PI |
| 72a | <i>Agave parviflora</i> Torrey                                           | No  | Asparagaceae <sup>k</sup>   | M | – <sup>n</sup> | 2              | P | 3,765          | 3.9            | 7.7  | 15.4 | 482 | O | <i>Agave</i> sp. <sup>e</sup> | FC:PI |
| 73b | <i>Agave portoricensis</i> Trel.                                         | No  | Asparagaceae <sup>k</sup>   | M | – <sup>n</sup> | 2              | P | 3,716          | 3.8            | 7.6  | 15.2 | 482 | O | <i>Agave</i> sp. <sup>e</sup> | FC:PI |
| 74a | <i>Agave potatorum</i><br>Zuccarini                                      | No  | Asparagaceae <sup>k</sup>   | M | – <sup>n</sup> | 6              | P | 11,736         | 12.0           | 24.0 | 48.0 | 482 | O | <i>Agave</i> sp. <sup>e</sup> | FC:PI |
| 75a | <i>Agave pumila</i> De Smet<br>ex Baker                                  | No  | Asparagaceae <sup>k</sup>   | M | – <sup>n</sup> | 4              | P | 8,020          | 8.2            | 16.4 | 32.8 | 482 | O | <i>Agave</i> sp. <sup>e</sup> | FC:PI |
| 76a | <i>Agave schottii</i> Engelm.                                            | No  | Asparagaceae <sup>k</sup>   | M | 60°            | 4              | P | 7,775          | 8.0            | 15.9 | 31.8 | 482 | O | <i>Agave</i> sp. <sup>e</sup> | FC:PI |
| 77e | <i>Agave sisalana</i> Perrine                                            | No  | Asparagaceae <sup>k</sup>   | M | 150°           | 5              | P | – <sup>t</sup> | – <sup>t</sup> | 20.2 | 40.4 | 482 | O | <i>Agave</i> sp. <sup>e</sup> | FC:PI |
| 78b | <i>Agave stricta</i> Salm-Dyck                                           | No  | Asparagaceae <sup>k</sup>   | M | 60°            | 2              | P | 3,814          | 3.9            | 7.8  | 15.6 | 482 | O | <i>Agave</i> sp. <sup>e</sup> | FC:PI |
| 79a | <i>Agave titanota</i> Gentry                                             | No  | Asparagaceae <sup>k</sup>   | M | – <sup>n</sup> | 2              | P | 4,157          | 4.3            | 8.5  | 17.0 | 482 | O | <i>Agave</i> sp. <sup>e</sup> | FC:PI |
| 80a | <i>Agave toumeyana</i><br>Trelease                                       | No  | Asparagaceae <sup>k</sup>   | M | 60°            | 4              | P | 7,775          | 8.0            | 15.9 | 31.8 | 482 | O | <i>Agave</i> sp. <sup>e</sup> | FC:PI |
| 81a | <i>Agave utahensis</i><br>Engelm. var.<br><i>nevadensis</i>              | No  | Asparagaceae <sup>k</sup>   | M | – <sup>n</sup> | 2              | P | 3,814          | 3.9            | 7.8  | 15.6 | 482 | O | <i>Agave</i> sp. <sup>e</sup> | FC:PI |
| 81b | <i>Agave utahensis</i><br>Engelm. subsp.<br><i>kaibabensis</i>           | No  | Asparagaceae <sup>k</sup>   | M | – <sup>n</sup> | 2              | P | 3,912          | 4.0            | 8.0  | 16.0 | 482 | O | <i>Agave</i> sp. <sup>e</sup> | FC:PI |
| 81c | <i>Agave utahensis</i> Engelm.                                           | No  | Asparagaceae <sup>k</sup>   | M | – <sup>n</sup> | 2              | P | 3,961          | 4.1            | 8.1  | 16.2 | 482 | O | <i>Agave</i> sp. <sup>e</sup> | FC:PI |

Continued

| Entry number <sup>e</sup> | Species                                                                  | Voucher          | Family                    | Higher group <sup>#</sup> | 2n <sup>‡</sup> | Ploidy level (x) | Life cycle type <sup>§</sup> | DNA amount             |         |         |         | Original ref. <sup>a</sup> | Present amount <sup>†</sup> | Standard species <sup>*b1</sup> | Method <sup>††</sup> |
|---------------------------|--------------------------------------------------------------------------|------------------|---------------------------|---------------------------|-----------------|------------------|------------------------------|------------------------|---------|---------|---------|----------------------------|-----------------------------|---------------------------------|----------------------|
|                           |                                                                          |                  |                           |                           |                 |                  |                              | 1C (Mbp <sup>b</sup> ) | 1C (pg) | 2C (pg) | 4C (pg) |                            |                             |                                 |                      |
| 81d                       | <i>Agave utahensis</i><br>Engelm.var. <i>eborispina</i>                  | No               | Asparagaceae <sup>k</sup> | M                         | – <sup>n</sup>  | 2                | P                            | 4,254                  | 4.4     | 8.7     | 17.4    | 482                        | O                           | <i>Agave</i> sp. <sup>c</sup>   | FC:PI                |
| 82a                       | <i>Agave victoriae-reginae</i><br>T.Moore                                | No               | Asparagaceae <sup>k</sup> | M                         | 60 <sup>o</sup> | 2                | P                            | 3,912                  | 4.0     | 8.0     | 16.0    | 482                        | O                           | <i>Agave</i> sp. <sup>c</sup>   | FC:PI                |
| 83a                       | <i>Agave victoriae-reginae</i><br>T.Moore                                | No               | Asparagaceae <sup>k</sup> | M                         | – <sup>n</sup>  | 6                | P                            | 11,736                 | 12.0    | 24.0    | 48.0    | 482                        | O                           | <i>Agave</i> sp. <sup>c</sup>   | FC:PI                |
| 84a                       | <i>Agrostis dyeri</i> Petrie                                             | Yes              | Poaceae <sup>j</sup>      | M                         | 42              | 6                | P                            | 5,286                  | 5.4     | 10.8    | 21.6    | 528                        | O                           | – <sup>w</sup>                  | FC:PI                |
| 85a                       | <i>Agrostis imbecilla</i> Zotov                                          | Yes              | Poaceae <sup>j</sup>      | M                         | 42              | 6                | P                            | 5,271                  | 5.4     | 10.8    | 21.6    | 528                        | O                           | – <sup>w</sup>                  | FC:PI                |
| 86a                       | <i>Agrostis magellanica</i><br>Lam. <sup>i</sup>                         | Yes              | Poaceae <sup>j</sup>      | M                         | 84              | 12               | P                            | 10,646                 | 10.9    | 21.8    | 43.5    | 528                        | O                           | – <sup>w</sup>                  | FC:PI                |
| 87a                       | <i>Agrostis muelleriana</i><br>Vickery                                   | Yes              | Poaceae <sup>j</sup>      | M                         | 42              | 6                | P                            | 5,506                  | 5.6     | 11.3    | 22.5    | 528                        | O                           | – <sup>w</sup>                  | FC:PI                |
| 88a                       | <i>Agrostis muscosa</i> Kirk                                             | Yes              | Poaceae <sup>j</sup>      | M                         | 42              | 6                | P                            | 5,174                  | 5.3     | 10.6    | 21.2    | 528                        | O                           | – <sup>w</sup>                  | FC:PI                |
| 89a                       | <i>Agrostis pallascens</i><br>Cheeseman                                  | Yes              | Poaceae <sup>j</sup>      | M                         | 42              | 6                | P                            | 5,320                  | 5.4     | 10.9    | 21.8    | 528                        | O                           | – <sup>w</sup>                  | FC:PI                |
| 90a                       | <i>Agrostis personata</i> Edgar                                          | Yes              | Poaceae <sup>j</sup>      | M                         | 42              | 6                | P                            | 5,203                  | 5.3     | 10.6    | 21.3    | 528                        | O                           | – <sup>w</sup>                  | FC:PI                |
| 91a                       | <i>Agrostis petriei</i> Hack.                                            | Yes              | Poaceae <sup>j</sup>      | M                         | 42              | 6                | P                            | 5,306                  | 5.4     | 10.9    | 21.7    | 528                        | O                           | – <sup>w</sup>                  | FC:PI                |
| 92a                       | <i>Aichryson laxum</i> (Haw.)<br>Bramwell                                | – <sup>m</sup>   | Crassulaceae              | E                         | 30 <sup>o</sup> | ≥ 2              | A                            | 660                    | 0.7     | 1.4     | 2.7     | 552                        | O                           | <i>Solan.</i> <sup>c</sup>      | FC:PI                |
| 93a                       | <i>Aichryson parlatorei</i><br>Bolle                                     | – <sup>m</sup>   | Crassulaceae              | E                         | c. 34           | ≥ 2              | A                            | 670                    | 0.7     | 1.4     | 2.7     | 552                        | O                           | <i>Solan.</i> <sup>c</sup>      | FC:PI                |
| 94a                       | <i>Allagopappus dichotomus</i><br>(L.f.) Cass.                           | – <sup>m</sup>   | Asteraceae <sup>j</sup>   | E                         | 20 <sup>o</sup> | 2                | P                            | 856                    | 0.9     | 1.8     | 3.5     | 477                        | O                           | <i>Glycine</i> <sup>c</sup>     | FC:PI                |
| 95b                       | <i>Alliaria petiolata</i><br>(M.Bieb.) Cavara &<br>Grande                | No               | Brassicaceae <sup>j</sup> | E                         | – <sup>n</sup>  | – <sup>p</sup>   | B                            | 1,320                  | 1.4     | 2.7     | 5.4     | 492                        | O                           | <i>Raphanus</i> <sup>c</sup>    | FC:PI                |
| 96e                       | <i>Allium ampeloprasum</i><br>L. s.l.                                    | Yes              | Amaryllidaceae            | M                         | – <sup>n</sup>  | – <sup>p</sup>   | P                            | 32,020                 | 32.7    | 65.5    | 131.0   | 492                        | O                           | B <sup>c</sup>                  | FC:PI                |
| 97m                       | <i>Allium cepa</i> L.                                                    | Yes              | Amaryllidaceae            | M                         | – <sup>n</sup>  | – <sup>p</sup>   | P                            | 16,474                 | 16.8    | 33.7    | 67.4    | 492                        | O                           | G <sup>c</sup>                  | FC:PI                |
| 98b                       | <i>Allium ledebourianum</i><br>Schult. & Schult.f.                       | Yes              | Amaryllidaceae            | M                         | – <sup>n</sup>  | – <sup>p</sup>   | P                            | 8,538                  | 8.7     | 17.5    | 34.9    | 492                        | O                           | G <sup>c</sup>                  | FC:PI                |
| 99d                       | <i>Allium triquetrum</i> <sup>i,1</sup>                                  | No               | Amaryllidaceae            | M                         | – <sup>n</sup>  | – <sup>p</sup>   | P                            | 18,655                 | 19.1    | 38.2    | 76.3    | 563                        | O                           | C <sup>c</sup>                  | FC:PI                |
| 100f                      | <i>Allium ursinum</i> L.                                                 | No               | Amaryllidaceae            | M                         | – <sup>n</sup>  | – <sup>p</sup>   | P                            | 30,357                 | 31.0    | 62.1    | 124.2   | 492                        | O                           | B <sup>c</sup>                  | FC:PI                |
| 101a                      | <i>Aloysia triphylla</i> <sup>1</sup>                                    | No               | Verbenaceae               | E                         | – <sup>n</sup>  | – <sup>p</sup>   | P                            | 719                    | 0.7     | 1.5     | 2.9     | 563                        | O                           | <i>Solan.</i> <sup>c</sup>      | FC:PI                |
| 102a                      | <i>Alyssum saxatile</i> L.                                               | Yes              | Brassicaceae <sup>j</sup> | E                         | 16              | 2                | – <sup>q</sup>               | 636                    | 0.7     | 1.3     | 2.6     | 599                        | O                           | L                               | FC:PI                |
| 103a                      | <i>Amana edulis</i> (Miq.)<br>Honda                                      | Yes              | Liliaceae                 | M                         | 24              | 2                | P                            | 21,003                 | 21.5    | 43.0    | 85.9    | 565                        | O                           | B                               | FC:PI                |
| 104b                      | <i>Amblyopyrum muticum</i><br>(= <i>Aegilops mutica</i> )<br>(Bois.) Eig | No <sup>m1</sup> | Poaceae <sup>j</sup>      | M                         | 14              | 2                | A                            | 5,692                  | 5.8     | 11.6    | 23.3    | 605                        | O                           | F-2118p                         | FC:PI                |
| 105a                      | <i>Amelanchier alnifolia</i><br>Nutt. cv. Smoky                          | Yes              | Rosaceae                  | E                         | – <sup>n</sup>  | 4 <sup>z</sup>   | P                            | 1,311                  | 1.3     | 2.7     | 5.4     | 527                        | O                           | G <sup>c</sup>                  | FC:PI                |
| 106a                      | <i>Amelanchier arboria</i><br>(Michx.f.) Fernald                         | Yes              | Rosaceae                  | E                         | – <sup>n</sup>  | 2 <sup>z</sup>   | P                            | 680                    | 0.7     | 1.4     | 2.8     | 527                        | O                           | G <sup>c</sup>                  | FC:PI                |
| 107a                      | <i>Amphibromus fluitans</i><br>Kirk                                      | Yes              | Poaceae <sup>j</sup>      | M                         | 42              | 6                | P                            | 3,897                  | 4.0     | 8.0     | 15.9    | 528                        | O                           | – <sup>w</sup>                  | FC:PI                |
| 108a                      | <i>Amphoricarpos</i><br><i>neumayeri</i> Visiani                         | No               | Asteraceae <sup>j</sup>   | E                         | 24              | 2                | P                            | 846                    | 0.9     | 1.7     | 3.5     | 502                        | O                           | <i>Petunia</i> <sup>c</sup>     | FC:PI                |
| 109a                      | <i>Andryala webbii</i><br>Sch. Bip. ex Christ                            | – <sup>m</sup>   | Asteraceae <sup>j</sup>   | E                         | 18 <sup>o</sup> | 2                | P                            | 1,751                  | 1.8     | 3.6     | 7.2     | 552                        | O                           | <i>Glycine</i> <sup>c</sup>     | FC:PI                |

|      |                                                                                                        |                |                           |   |                    |                |   |        |      |      |       |                   |   |                              |       |
|------|--------------------------------------------------------------------------------------------------------|----------------|---------------------------|---|--------------------|----------------|---|--------|------|------|-------|-------------------|---|------------------------------|-------|
| 110a | <i>Anemanthele lessoniana</i> (Steud.) Veldkamp                                                        | Yes            | Poaceae <sup>j</sup>      | M | 40-44 <sup>o</sup> | 4              | P | 924    | 0.9  | 1.9  | 3.8   | 528               | O | – <sup>w</sup>               | FC:PI |
| 111a | <i>Anemone flaccida</i> F.Schmidt                                                                      | No             | Ranunculaceae             | E | 14 <sup>o</sup>    | 2              | P | 28,020 | 28.7 | 57.3 | 114.6 | 495               | O | F                            | FC:PI |
| 112b | <i>Anemone ranunculoides</i> L.                                                                        | No             | Ranunculaceae             | E | – <sup>n</sup>     | – <sup>p</sup> | P | 18,010 | 18.4 | 36.8 | 73.7  | 492               | O | C <sup>c</sup>               | FC:PI |
| 113b | <i>Anemone sylvestris</i> L.                                                                           | No             | Ranunculaceae             | E | – <sup>n</sup>     | – <sup>p</sup> | P | 8,323  | 8.5  | 17.0 | 34.0  | 492               | O | C <sup>c</sup>               | FC:PI |
| 114a | <i>Anthocephalus cadamba</i> (Roxb.) Miq.                                                              | No             | Rubiaceae                 | E | – <sup>n</sup>     | – <sup>p</sup> | P | 677    | 0.7  | 1.4  | 2.8   | 501 <sup>ab</sup> | O | B <sup>c</sup>               | Fe    |
| 115a | <i>Aquilegia vulgaris</i> L.                                                                           | No             | Ranunculaceae             | E | – <sup>n</sup>     | – <sup>p</sup> | P | 494    | 0.5  | 1.0  | 2.0   | 492               | O | <i>Raphanus</i> <sup>c</sup> | FC:PI |
| 116a | <i>Arabidopsis arenosa</i> (L.) Lawalrée <sup>b</sup>                                                  | Yes            | Brassicaceae <sup>j</sup> | E | 16                 | 2              | B | 196    | 0.2  | 0.4  | 0.8   | 599               | O | L                            | FC:PI |
| 117a | <i>Arabidopsis arenosa</i> (L.) Lawalrée <sup>i</sup>                                                  | Yes            | Brassicaceae <sup>j</sup> | E | 32                 | 4              | B | 381    | 0.4  | 0.8  | 1.6   | 599               | O | L                            | FC:PI |
| 117b | <i>Arabidopsis arenosa</i> (L.) Lawalrée                                                               | – <sup>m</sup> | Brassicaceae <sup>j</sup> | E | 32 <sup>o</sup>    | 4              | B | 408    | 0.4  | 0.8  | 1.7   | 509               | O | – <sup>w</sup>               | FC:PI |
| 117c | <i>Arabidopsis arenosa</i> (L.) Lawalrée                                                               | Yes            | Brassicaceae <sup>j</sup> | E | 32                 | 4              | B | 425    | 0.4  | 0.9  | 1.7   | 540               | O | <i>Raphanus</i> <sup>c</sup> | FC:PI |
| 118a | <i>Arabidopsis cebennensis</i> (DC.) O’Kane & Al-Shehbaz                                               | Yes            | Brassicaceae <sup>j</sup> | E | 16                 | 2              | B | 284    | 0.3  | 0.6  | 1.2   | 599               | O | L                            | FC:PI |
| 119a | <i>Arabidopsis halleri</i> (L.) O’Kane & Al-Shehbaz                                                    | Yes            | Brassicaceae <sup>j</sup> | E | 16                 | 2              | B | 235    | 0.2  | 0.5  | 1.0   | 599               | O | L                            | FC:PI |
| 119b | <i>Arabidopsis halleri</i> (L.) O’Kane & Al-Shehbaz                                                    | Yes            | Brassicaceae <sup>j</sup> | E | 16                 | 2              | B | 274    | 0.3  | 0.6  | 1.1   | 540               | O | <i>Raphanus</i> <sup>c</sup> | FC:PI |
| 119c | <i>Arabidopsis halleri</i> (L.) O’Kane & Shehbaz subsp. <i>gemmifera</i> (Matsum.) O’Kane & Al-Shehbaz | – <sup>m</sup> | Brassicaceae <sup>j</sup> | E | 16                 | 2              | B | 255    | 0.3  | 0.5  | 1.0   | 509               | O | – <sup>w</sup>               | FC:PI |
| 120a | <i>Arabidopsis lyrata</i> (L.) O’Kane & Al-Shehbaz subsp. <i>lyrata</i>                                | Yes            | Brassicaceae <sup>j</sup> | E | 16                 | 2              | P | 245    | 0.3  | 0.5  | 1.0   | 599               | O | L                            | FC:PI |
| 120b | <i>Arabidopsis lyrata</i> (L.) O’Kane & Al-Shehbaz                                                     | Yes            | Brassicaceae <sup>j</sup> | E | 16                 | 2              | B | 245    | 0.3  | 0.5  | 1.0   | 522               | O | <i>Raphanus</i> <sup>c</sup> | FC:PI |
| 120c | <i>Arabidopsis lyrata</i> L. subsp. <i>petraea</i>                                                     | No             | Brassicaceae <sup>j</sup> | E | 16                 | 2              | P | 254    | 0.3  | 0.5  | 1.0   | 508               | O | – <sup>ak</sup>              | FC:PI |
| 120d | <i>Arabidopsis lyrata</i> L. subsp. <i>lyrata</i>                                                      | No             | Brassicaceae <sup>j</sup> | E | 16                 | 2              | P | 240    | 0.2  | 0.5  | 1.0   | 508               | O | – <sup>ak</sup>              | FC:PI |
| 120e | <i>Arabidopsis lyrata</i> (L.) O’Kane & Al-Shehbaz subsp. <i>petraea</i> (L.) O’Kane                   | No             | Brassicaceae <sup>j</sup> | E | – <sup>n</sup>     | – <sup>p</sup> | P | 299    | 0.3  | 0.6  | 1.2   | 518               | O | <i>Glycine</i> <sup>c</sup>  | FC:PI |
| 121a | <i>Arabidopsis lyrata</i> L. subsp. <i>petraea</i>                                                     | No             | Brassicaceae <sup>j</sup> | E | 32                 | 4              | P | 440    | 0.5  | 0.9  | 1.8   | 508               | O | – <sup>ak</sup>              | FC:PI |
| 121b | <i>Arabidopsis lyrata</i> (L.) O’Kane & Al-Shehbaz                                                     | – <sup>m</sup> | Brassicaceae <sup>j</sup> | E | 32                 | 4              | P | 458    | 0.5  | 0.9  | 1.9   | 509               | O | – <sup>w</sup>               | FC:PI |
| 121c | <i>Arabidopsis lyrata</i> L. subsp. <i>kawasakiana</i>                                                 | No             | Brassicaceae <sup>j</sup> | E | 32                 | 4              | P | 538    | 0.6  | 1.1  | 2.2   | 508               | O | – <sup>ak</sup>              | FC:PI |
| 122a | <i>Arabidopsis neglecta</i> (Schult.) O’Kane & Al-Shehbaz <sup>i</sup>                                 | Yes            | Brassicaceae <sup>j</sup> | E | 16                 | 2              | B | 196    | 0.2  | 0.4  | 0.8   | 599               | O | L                            | FC:PI |
| 123a | <i>Arabidopsis neglecta</i> (Schult.) O’Kane & Al-Shehbaz <sup>i</sup>                                 | Yes            | Brassicaceae <sup>j</sup> | E | 32                 | 4              | B | 391    | 0.4  | 0.8  | 1.6   | 599               | O | L                            | FC:PI |

Continued

| Entry number <sup>g</sup> | Species                                                              | Voucher          | Family                    | Higher group <sup>#</sup> | 2n <sup>‡</sup>     | Ploidy level (x) | Life cycle type <sup>§</sup> | DNA amount             |         |         |         | Original ref. <sup>a</sup> | Present amount <sup>‡</sup> | Standard species <sup>*b1</sup> | Method <sup>††</sup> |
|---------------------------|----------------------------------------------------------------------|------------------|---------------------------|---------------------------|---------------------|------------------|------------------------------|------------------------|---------|---------|---------|----------------------------|-----------------------------|---------------------------------|----------------------|
|                           |                                                                      |                  |                           |                           |                     |                  |                              | 1C (Mbp <sup>b</sup> ) | 1C (pg) | 2C (pg) | 4C (pg) |                            |                             |                                 |                      |
| 123b                      | <i>Arabidopsis neglecta</i> (Schult.) O'Kane & Al-Shehbaz            | Yes              | Brassicaceae <sup>j</sup> | E                         | 32                  | 4                | B                            | 425                    | 0.4     | 0.9     | 1.7     | 540                        | O                           | <i>Raphanus</i> <sup>e</sup>    | FC:PI                |
| 124a                      | <i>Arabidopsis pumila</i> Busch                                      | No               | Brassicaceae <sup>j</sup> | E                         | – <sup>n</sup>      | – <sup>p</sup>   | A                            | 329                    | 0.3     | 0.7     | 1.3     | 518                        | O                           | <i>Glycine</i> <sup>e</sup>     | FC:PI                |
| 125a                      | <i>Arabidopsis suecica</i> Norrl.                                    | Yes              | Brassicaceae <sup>j</sup> | E                         | 26                  | 4                | A                            | 342                    | 0.4     | 0.7     | 1.4     | 599                        | O                           | L                               | FC:PI                |
| 125b                      | <i>Arabidopsis suecica</i> (Fries) Norrlin                           | – <sup>m</sup>   | Brassicaceae <sup>j</sup> | E                         | 26 <sup>o</sup>     | 4                | A                            | 348                    | 0.4     | 0.7     | 1.4     | 509                        | O                           | – <sup>w</sup>                  | FC:PI                |
| 126i                      | <i>Arabidopsis thaliana</i> (L.) Heynh.                              | No               | Brassicaceae <sup>j</sup> | E                         | – <sup>n</sup>      | – <sup>p</sup>   | A                            | 210                    | 0.2     | 0.4     | 0.9     | 492                        | O                           | <i>Raphanus</i> <sup>e</sup>    | FC:PI                |
| 126j                      | <i>Arabidopsis thaliana</i> (L.) Heynh. accession Col <sup>h</sup>   | No <sup>m1</sup> | Brassicaceae <sup>j</sup> | E                         | 10 <sup>o</sup>     | 2                | A                            | 201                    | 0.2     | 0.4     | 0.8     | 494 <sup>ac</sup>          | O                           | <i>Raphanus</i> <sup>e</sup>    | FC:PI                |
| 126k                      | <i>Arabidopsis thaliana</i> (L.) Heynh. accession Kly-1 <sup>h</sup> | No <sup>m1</sup> | Brassicaceae <sup>j</sup> | E                         | 10 <sup>o</sup>     | 2                | A                            | 219                    | 0.2     | 0.4     | 0.9     | 494 <sup>ac</sup>          | O                           | <i>Raphanus</i> <sup>e</sup>    | FC:PI                |
| 126l                      | <i>Arabidopsis thaliana</i> (L.) Heynh.                              | Yes              | Brassicaceae <sup>j</sup> | E                         | 10 <sup>o</sup>     | 2                | A                            | 166                    | 0.2     | 0.3     | 0.7     | 522                        | O                           | <i>Raphanus</i> <sup>e</sup>    | FC:PI                |
| 126m                      | <i>Arabidopsis thaliana</i> ecotype Columbia (L.) Heynh.             | – <sup>m</sup>   | Brassicaceae <sup>j</sup> | E                         | 10                  | 2                | A                            | 156                    | 0.2     | 0.3     | 0.6     | 509                        | O                           | – <sup>w</sup>                  | FC:PI                |
| 127a                      | <i>Arabidopsis thaliana</i> (L.) Heynh. accession Stoc <sup>h</sup>  | No <sup>m1</sup> | Brassicaceae <sup>j</sup> | E                         | 20 <sup>o</sup>     | 4                | A                            | 435                    | 0.4     | 0.9     | 1.8     | 494 <sup>ac</sup>          | O                           | <i>Raphanus</i> <sup>e</sup>    | FC:PI                |
| 127b                      | <i>Arabidopsis thaliana</i> (L.) Heynh. accession Wa-1 <sup>h</sup>  | – <sup>m</sup>   | Brassicaceae <sup>j</sup> | E                         | 20 <sup>o</sup>     | 4                | A                            | 436                    | 0.4     | 0.9     | 1.8     | 494 <sup>ac</sup>          | O                           | <i>Raphanus</i> <sup>e</sup>    | FC:PI                |
| 128a                      | <i>Arabidopsis wallichii</i> (Hook. f. & Thomson) N.Busch            | No               | Brassicaceae <sup>j</sup> | E                         | – <sup>n</sup>      | – <sup>p</sup>   | AP                           | 389                    | 0.4     | 0.8     | 1.6     | 518                        | O                           | <i>Glycine</i> <sup>e</sup>     | FC:PI                |
| 129a                      | <i>Arabis alpina</i> L.                                              | Yes              | Brassicaceae <sup>j</sup> | E                         | 16                  | 2                | – <sup>q</sup>               | 372                    | 0.4     | 0.8     | 1.5     | 599                        | O                           | L                               | FC:PI                |
| 130a                      | <i>Arabis cenisia</i> Reut.                                          | Yes              | Brassicaceae <sup>j</sup> | E                         | 16                  | 2                | – <sup>q</sup>               | 303                    | 0.3     | 0.6     | 1.2     | 599                        | O                           | L                               | FC:PI                |
| 131a                      | <i>Arabis hirsuta</i> (L.) Scop.                                     | – <sup>m</sup>   | Brassicaceae <sup>j</sup> | E                         | 32 <sup>o</sup>     | 4                | – <sup>q</sup>               | 671                    | 0.7     | 1.4     | 2.7     | 509                        | O                           | – <sup>w</sup>                  | FC:PI                |
| 132a                      | <i>Arabis procurrens</i> Waldst. & Kit.                              | Yes              | Brassicaceae <sup>j</sup> | E                         | 16, 32 <sup>o</sup> | – <sup>p</sup>   | – <sup>q</sup>               | 352                    | 0.4     | 0.7     | 1.4     | 599                        | O                           | L                               | FC:PI                |
| 133a                      | <i>Arabis scopoliana</i> Boiss.                                      | Yes              | Brassicaceae <sup>j</sup> | E                         | – <sup>n</sup>      | – <sup>p</sup>   | – <sup>q</sup>               | 1,428                  | 1.5     | 2.9     | 5.8     | 599                        | O                           | L                               | FC:PI                |
| 134a                      | <i>Arabis tibetica</i> Hook.f. & Thomson                             | Yes              | Brassicaceae <sup>j</sup> | E                         | 16                  | 2                | – <sup>q</sup>               | 323                    | 0.3     | 0.7     | 1.3     | 599                        | O                           | L                               | FC:PI                |
| 135a                      | <i>Argyranthemum</i> cf. <i>coronopifolium</i> (Willd.) Humphries    | – <sup>m</sup>   | Asteraceae <sup>j</sup>   | E                         | 18 <sup>o</sup>     | 2                | P                            | 6,670                  | 6.8     | 13.6    | 27.3    | 552                        | O                           | G <sup>c</sup>                  | FC:PI                |
| 136a                      | <i>Argyranthemum adauctum</i> (Link) Humphr. subsp. <i>adauctum</i>  | – <sup>m</sup>   | Asteraceae <sup>j</sup>   | E                         | 18                  | 2                | P                            | 6,694                  | 6.8     | 13.7    | 27.4    | 477                        | O                           | G <sup>c</sup>                  | FC:PI                |
| 136b                      | <i>Argyranthemum adauctum</i> (Link) Humphr. subsp. <i>dugourii</i>  | – <sup>m</sup>   | Asteraceae <sup>j</sup>   | E                         | 18                  | 2                | P                            | 6,734                  | 6.9     | 13.8    | 27.5    | 477                        | O                           | G <sup>c</sup>                  | FC:PI                |



|      |                                                                                     |                |                         |   |                |                |   |       |     |      |      |     |   |                             |       |
|------|-------------------------------------------------------------------------------------|----------------|-------------------------|---|----------------|----------------|---|-------|-----|------|------|-----|---|-----------------------------|-------|
| 137a | <i>Argyranthemum broussonetii</i> (Pers.)<br>Humphr. subsp.<br><i>broussonetii</i>  | – <sup>m</sup> | Asteraceae <sup>j</sup> | E | 18°            | 2              | P | 6,914 | 7.1 | 14.1 | 28.3 | 477 | O | G <sup>c</sup>              | FC:PI |
| 138a | <i>Argyranthemum foeniculaceum</i> (Willd.)<br>Webb ex Sch. Bip.                    | – <sup>m</sup> | Asteraceae <sup>j</sup> | E | 18°            | 2              | P | 6,983 | 7.1 | 14.3 | 28.6 | 477 | O | G <sup>c</sup>              | FC:PI |
| 139a | <i>Argyranthemum frutescens</i> (L.)<br>Sch. Bip. subsp.<br><i>frutescens</i>       | – <sup>m</sup> | Asteraceae <sup>j</sup> | E | 18°            | 2              | P | 7,046 | 7.2 | 14.4 | 28.8 | 477 | O | G <sup>c</sup>              | FC:PI |
| 140a | <i>Argyranthemum gracile</i><br>Sch. Bip.                                           | – <sup>m</sup> | Asteraceae <sup>j</sup> | E | 18°            | 2              | P | 6,934 | 7.1 | 14.2 | 28.4 | 477 | O | G <sup>c</sup>              | FC:PI |
| 141a | <i>Argyranthemum haouarytheum</i><br>Humphr. & Bramw.                               | – <sup>m</sup> | Asteraceae <sup>j</sup> | E | 18             | 2              | P | 6,548 | 6.7 | 13.4 | 26.8 | 477 | O | G <sup>c</sup>              | FC:PI |
| 142a | <i>Argyranthemum teneriffae</i> Humphr.                                             | – <sup>m</sup> | Asteraceae <sup>j</sup> | E | 18             | 2              | P | 6,817 | 7.0 | 13.9 | 27.9 | 477 | O | G <sup>c</sup>              | FC:PI |
| 143a | <i>Argyranthemum vincentii</i><br>Santos & Feria                                    | – <sup>m</sup> | Asteraceae <sup>j</sup> | E | 18             | 2              | P | 6,900 | 7.1 | 14.1 | 28.2 | 552 | O | G <sup>c</sup>              | FC:PI |
| 144a | <i>Argyranthemum webbii</i><br>Sch. Bip.                                            | – <sup>m</sup> | Asteraceae <sup>j</sup> | E | 18°            | 2              | P | 6,572 | 6.7 | 13.4 | 26.9 | 552 | O | G <sup>c</sup>              | FC:PI |
| 145a | <i>Arrhenatherum calderae</i><br>A. Hansen                                          | – <sup>m</sup> | Poaceae <sup>j</sup>    | M | – <sup>n</sup> | – <sup>p</sup> | P | 4,699 | 4.8 | 9.6  | 19.2 | 552 | O | H <sup>c</sup>              | FC:PI |
| 146a | <i>Artemisia abrotanum</i> L.                                                       | Yes            | Asteraceae <sup>j</sup> | E | 18°            | 2              | P | 2,826 | 2.9 | 5.8  | 11.6 | 521 | O | G <sup>c</sup>              | FC:PI |
| 147a | <i>Artemisia abrotanum</i> L.                                                       | Yes            | Asteraceae <sup>j</sup> | E | 36°            | 4              | P | 5,579 | 5.7 | 11.4 | 22.8 | 521 | O | G <sup>c</sup>              | FC:PI |
| 148d | <i>Artemisia absinthium</i> L.                                                      | Yes            | Asteraceae <sup>j</sup> | E | 18°            | 2              | P | 4,430 | 4.5 | 9.1  | 18.1 | 521 | O | G-147a                      | FC:PI |
| 149a | <i>Artemisia afra</i> Jacq.                                                         | Yes            | Asteraceae <sup>j</sup> | E | 18             | 2              | P | 3,086 | 3.2 | 6.3  | 12.6 | 521 | O | G                           | FC:PI |
| 150a | <i>Artemisia arbuscula</i> Nutt.                                                    | Yes            | Asteraceae <sup>j</sup> | E | 18°            | 2              | P | 4,509 | 4.6 | 9.2  | 18.4 | 521 | O | <i>Petunia</i> <sup>c</sup> | FC:PI |
| 151a | <i>Artemisia arenaria</i> DC.                                                       | Yes            | Asteraceae <sup>j</sup> | E | 36             | 4              | P | 5,032 | 5.1 | 10.3 | 20.6 | 521 | O | <i>Petunia</i> <sup>c</sup> | FC:PI |
| 151b | <i>Artemisia arenaria</i> DC.                                                       | Yes            | Asteraceae <sup>j</sup> | E | 36             | 4              | P | 5,086 | 5.2 | 10.4 | 20.8 | 553 | O | G <sup>c</sup>              | FC:PI |
| 152a | <i>Artemisia aschurbajewii</i><br>C. Winkler                                        | Yes            | Asteraceae <sup>j</sup> | E | 36°            | 4              | P | 5,066 | 5.2 | 10.4 | 20.7 | 521 | O | <i>Petunia</i> <sup>c</sup> | FC:PI |
| 153a | <i>Artemisia austriaca</i> Jacq.                                                    | Yes            | Asteraceae <sup>j</sup> | E | 16°            | 2              | P | 2,910 | 3.0 | 6.0  | 11.9 | 521 | O | G <sup>c</sup>              | FC:PI |
| 154a | <i>Artemisia bargusinensis</i><br>Spreng.                                           | Yes            | Asteraceae <sup>j</sup> | E | 36             | 4              | P | 4,254 | 4.4 | 8.7  | 17.4 | 553 | O | <i>Petunia</i> <sup>c</sup> | FC:PI |
| 155a | <i>Artemisia bigelovii</i><br>A. Gray                                               | Yes            | Asteraceae <sup>j</sup> | E | 36°            | 4              | P | 7,575 | 7.7 | 15.5 | 31.0 | 521 | O | G <sup>c</sup>              | FC:PI |
| 156b | <i>Artemisia caerulescens</i> L.                                                    | Yes            | Asteraceae <sup>j</sup> | E | 18°            | 2              | P | 3,144 | 3.2 | 6.4  | 12.9 | 580 | O | G <sup>c</sup>              | CIA   |
| 157b | <i>Artemisia campestris</i> L.                                                      | Yes            | Asteraceae <sup>j</sup> | E | 18             | 2              | P | 3,120 | 3.2 | 6.4  | 12.8 | 521 | O | <i>Petunia</i> <sup>c</sup> | FC:PI |
| 158b | <i>Artemisia campestris</i> L. <sup>1</sup>                                         | Yes            | Asteraceae <sup>j</sup> | E | 36°            | 4              | P | 4,851 | 5.0 | 9.9  | 19.8 | 521 | O | G <sup>c</sup>              | FC:PI |
| 158c | <i>Artemisia campestris</i><br>(Fr.) Leuwke &<br>Rothm. L. subsp.<br><i>sericea</i> | Yes            | Asteraceae <sup>j</sup> | E | 36°            | 4              | P | 5,188 | 5.3 | 10.6 | 21.2 | 521 | O | G <sup>c</sup>              | FC:PI |
| 159a | <i>Artemisia cana</i> Pursh.<br>subsp. <i>viscidula</i><br>(Osterhout) Beetle       | Yes            | Asteraceae <sup>j</sup> | E | 18°            | 2              | P | 4,176 | 4.3 | 8.5  | 17.1 | 521 | O | <i>Petunia</i> <sup>c</sup> | FC:PI |
| 160a | <i>Artemisia changaica</i><br>Krasch.                                               | Yes            | Asteraceae <sup>j</sup> | E | 36             | 4              | P | 5,721 | 5.9 | 11.7 | 23.4 | 553 | O | G <sup>c</sup>              | FC:PI |
| 161a | <i>Artemisia depauperata</i><br>Krasch.                                             | Yes            | Asteraceae <sup>j</sup> | E | 36             | 4              | P | 4,313 | 4.4 | 8.8  | 17.6 | 553 | O | <i>Petunia</i> <sup>c</sup> | FC:PI |
| 162a | <i>Artemisia desertorum</i><br>Spreng.                                              | Yes            | Asteraceae <sup>j</sup> | E | 36             | 4              | P | 4,044 | 4.1 | 8.3  | 16.5 | 553 | O | <i>Petunia</i> <sup>c</sup> | FC:PI |
| 163a | <i>Artemisia dracunculoides</i><br>Pursh                                            | Yes            | Asteraceae <sup>j</sup> | E | 54             | 6              | P | 7,619 | 7.8 | 15.6 | 31.2 | 553 | O | G <sup>c</sup>              | FC:PI |

Continued

| Entry number <sup>e</sup> | Species                                                    | Voucher        | Family                  | Higher group <sup>#</sup> | 2n <sup>‡</sup> | Ploidy level (x) | Life cycle type <sup>§</sup> | DNA amount             |         |         |         | Original ref. <sup>a</sup> | Present amount <sup>†</sup> | Standard species <sup>*b1</sup> | Method <sup>††</sup> |
|---------------------------|------------------------------------------------------------|----------------|-------------------------|---------------------------|-----------------|------------------|------------------------------|------------------------|---------|---------|---------|----------------------------|-----------------------------|---------------------------------|----------------------|
|                           |                                                            |                |                         |                           |                 |                  |                              | 1C (Mbp <sup>b</sup> ) | 1C (pg) | 2C (pg) | 4C (pg) |                            |                             |                                 |                      |
| 164a                      | <i>Artemisia dracunculus</i> L.                            | Yes            | Asteraceae <sup>j</sup> | E                         | 18              | 2                | P                            | 2,905                  | 3.0     | 5.9     | 11.9    | 553                        | O                           | <i>Petunia</i> <sup>c</sup>     | FC:PI                |
| 165a                      | <i>Artemisia dracunculus</i> L.                            | Yes            | Asteraceae <sup>j</sup> | E                         | 36              | 4                | P                            | 5,780                  | 5.9     | 11.8    | 23.6    | 553                        | O                           | G <sup>c</sup>                  | FC:PI                |
| 166a                      | <i>Artemisia dracunculus</i> L.                            | Yes            | Asteraceae <sup>j</sup> | E                         | 54              | 6                | P                            | 7,682                  | 7.9     | 15.7    | 31.4    | 553                        | O                           | G <sup>c</sup>                  | FC:PI                |
| 167a                      | <i>Artemisia dracunculus</i> L.                            | Yes            | Asteraceae <sup>j</sup> | E                         | 90              | 10               | P                            | 12,020                 | 12.3    | 24.6    | 49.2    | 553                        | O                           | G <sup>c</sup>                  | FC:PI                |
| 168a                      | <i>Artemisia filifolia</i> Torrey                          | Yes            | Asteraceae <sup>j</sup> | E                         | 18              | 2                | P                            | 3,491                  | 3.6     | 7.1     | 14.3    | 521                        | O                           | <i>Petunia</i> <sup>c</sup>     | FC:PI                |
| 169a                      | <i>Artemisia frigida</i> Willd.                            | Yes            | Asteraceae <sup>j</sup> | E                         | 18              | 2                | P                            | 2,567                  | 2.6     | 5.3     | 10.5    | 521                        | O                           | G <sup>c</sup>                  | FC:PI                |
| 170a                      | <i>Artemisia giraldii</i> Pamp.                            | Yes            | Asteraceae <sup>j</sup> | E                         | 18              | 2                | P                            | 2,934                  | 3.0     | 6.0     | 12.0    | 553                        | O                           | G <sup>c</sup>                  | FC:PI                |
| 171a                      | <i>Artemisia glacialis</i> L.                              | Yes            | Asteraceae <sup>j</sup> | E                         | 16              | 2                | P                            | 4,166                  | 4.3     | 8.5     | 17.0    | 521                        | O                           | <i>Petunia</i> <sup>c</sup>     | FC:PI                |
| 172a                      | <i>Artemisia glauca</i> Pall.<br>ex Willd.                 | Yes            | Asteraceae <sup>j</sup> | E                         | 36              | 4                | P                            | 5,853                  | 6.0     | 12.0    | 23.9    | 553                        | O                           | G <sup>c</sup>                  | FC:PI                |
| 173a                      | <i>Artemisia globosa</i><br>Krasch.                        | Yes            | Asteraceae <sup>j</sup> | E                         | 36              | 4                | P                            | 4,533                  | 4.6     | 9.3     | 18.5    | 553                        | O                           | <i>Petunia</i> <sup>c</sup>     | FC:PI                |
| 174a                      | <i>Artemisia lagocephala</i><br>(Fischer ex Besser)<br>DC. | Yes            | Asteraceae <sup>j</sup> | E                         | 18              | 2                | P                            | 3,301                  | 3.4     | 6.8     | 13.5    | 521                        | O                           | <i>Petunia</i> <sup>c</sup>     | FC:PI                |
| 175a                      | <i>Artemisia ledebouriana</i><br>Besser.                   | Yes            | Asteraceae <sup>j</sup> | E                         | 36              | 4                | P                            | 4,279                  | 4.4     | 8.8     | 17.5    | 553                        | O                           | <i>Petunia</i> <sup>c</sup>     | FC:PI                |
| 176a                      | <i>Artemisia leucodes</i><br>Schrenk                       | Yes            | Asteraceae <sup>j</sup> | E                         | 18 <sup>o</sup> | 2                | A                            | 7,526                  | 7.7     | 15.4    | 30.8    | 521                        | O                           | G <sup>c</sup>                  | FC:PI                |
| 177a                      | <i>Artemisia macilentata</i><br>(Maxim.) Krasch.           | Yes            | Asteraceae <sup>j</sup> | E                         | 36              | 4                | P                            | 4,425                  | 4.5     | 9.1     | 18.1    | 553                        | O                           | <i>Petunia</i> <sup>c</sup>     | FC:PI                |
| 178a                      | <i>Artemisia marschalliana</i><br>Spreng.                  | Yes            | Asteraceae <sup>j</sup> | E                         | 18              | 2                | P                            | 2,626                  | 2.7     | 5.4     | 10.7    | 553                        | O                           | G <sup>c</sup>                  | FC:PI                |
| 179a                      | <i>Artemisia monostachya</i><br>Bunge ex Maxim.            | Yes            | Asteraceae <sup>j</sup> | E                         | 36              | 4                | P                            | 4,293                  | 4.4     | 8.8     | 17.6    | 553                        | O                           | <i>Petunia</i> <sup>c</sup>     | FC:PI                |
| 180a                      | <i>Artemisia nova</i> Nelson                               | Yes            | Asteraceae <sup>j</sup> | E                         | 18 <sup>o</sup> | 2                | P                            | 3,115                  | 3.2     | 6.4     | 12.7    | 521                        | O                           | <i>Petunia</i> <sup>c</sup>     | FC:PI                |
| 181a                      | <i>Artemisia oxycephala</i><br>Kitag.                      | Yes            | Asteraceae <sup>j</sup> | E                         | 18              | 2                | P                            | 2,059                  | 2.1     | 4.2     | 8.4     | 553                        | O                           | <i>Petunia</i> <sup>c</sup>     | FC:PI                |
| 182a                      | <i>Artemisia persica</i> Boiss.                            | Yes            | Asteraceae <sup>j</sup> | E                         | 18 <sup>o</sup> | 2                | P                            | 3,203                  | 3.3     | 6.6     | 13.1    | 521                        | O                           | G <sup>c</sup>                  | FC:PI                |
| 183a                      | <i>Artemisia princeps</i><br>Pampan.                       | Yes            | Asteraceae <sup>j</sup> | E                         | 52              | 6                | P                            | 7,139                  | 7.3     | 14.6    | 29.2    | 521                        | O                           | G <sup>c</sup>                  | FC:PI                |
| 184a                      | <i>Artemisia pycnorhiza</i><br>Ledeb.                      | Yes            | Asteraceae <sup>j</sup> | E                         | 36              | 4                | P                            | 4,411                  | 4.5     | 9.0     | 18.0    | 553                        | O                           | <i>Petunia</i> <sup>c</sup>     | FC:PI                |
| 185a                      | <i>Artemisia pygmaea</i><br>A.Gray                         | Yes            | Asteraceae <sup>j</sup> | E                         | 18 <sup>o</sup> | 2                | P                            | 5,643                  | 5.8     | 11.5    | 23.1    | 521                        | O                           | G <sup>c</sup>                  | FC:PI                |
| 186a                      | <i>Artemisia santolinifolia</i><br>Turcz ex H.Kraschen.    | Yes            | Asteraceae <sup>j</sup> | E                         | 18              | 2                | P                            | 2,259                  | 2.3     | 4.6     | 9.2     | 521                        | O                           | G <sup>c</sup>                  | FC:PI                |
| 187a                      | <i>Artemisia scoparia</i><br>Waldst. & Kit.                | Yes            | Asteraceae <sup>j</sup> | E                         | 16 <sup>o</sup> | 2                | A                            | 1,731                  | 1.8     | 3.5     | 7.1     | 521                        | O                           | <i>Petunia</i> <sup>c</sup>     | FC:PI                |
| 188a                      | <i>Artemisia sieversiana</i><br>Ehrh. in Willd.            | Yes            | Asteraceae <sup>j</sup> | E                         | 18 <sup>o</sup> | 2                | A                            | 3,017                  | 3.1     | 6.2     | 12.3    | 521                        | O                           | <i>Petunia</i> <sup>c</sup>     | FC:PI                |
| 189a                      | <i>Artemisia sosnovskyi</i><br>Krasch.                     | Yes            | Asteraceae <sup>j</sup> | E                         | 36              | 4                | P                            | 5,164                  | 5.3     | 10.6    | 21.1    | 553                        | O                           | G <sup>c</sup>                  | FC:PI                |
| 190a                      | <i>Artemisia stelleriana</i><br>Besser                     | Yes            | Asteraceae <sup>j</sup> | E                         | 18              | 2                | P                            | 2,983                  | 3.1     | 6.1     | 12.2    | 521                        | O                           | <i>Petunia</i> <sup>c</sup>     | FC:PI                |
| 191a                      | <i>Artemisia subdigitata</i><br>Mattf.                     | Yes            | Asteraceae <sup>j</sup> | E                         | 36              | 4                | P                            | 5,716                  | 5.8     | 11.7    | 23.4    | 553                        | O                           | G <sup>c</sup>                  | FC:PI                |
| 192b                      | <i>Artemisia thuscula</i> Cav.                             | – <sup>m</sup> | Asteraceae <sup>j</sup> | E                         | 18 <sup>o</sup> | 2                | P                            | 5,589                  | 5.7     | 11.4    | 22.9    | 477                        | O                           | G <sup>c</sup>                  | FC:PI                |
| 193a                      | <i>Artemisia tournefortiana</i><br>Reichenb.               | Yes            | Asteraceae <sup>j</sup> | E                         | 18 <sup>o</sup> | 2                | AB                           | 3,452                  | 3.5     | 7.1     | 14.1    | 521                        | O                           | G <sup>c</sup>                  | FC:PI                |

|      |                                                                                |                |                            |   |                |                |                |        |      |      |      |                   |   |                              |       |
|------|--------------------------------------------------------------------------------|----------------|----------------------------|---|----------------|----------------|----------------|--------|------|------|------|-------------------|---|------------------------------|-------|
| 194b | <i>Artemisia tridentata</i> Nutt. subsp. <i>tridentata</i>                     | Yes            | Asteraceae <sup>j</sup>    | E | 18°            | 2              | P              | 3,995  | 4.1  | 8.2  | 16.3 | 521               | O | <i>Petunia</i> <sup>e</sup>  | FC:PI |
| 194c | <i>Artemisia tridentata</i> Nutt. subsp. <i>vaseyana</i> (Rydb.) Beetle        | Yes            | Asteraceae <sup>j</sup>    | E | 18°            | 2              | P              | 4,235  | 4.3  | 8.7  | 17.3 | 521               | O | <i>Petunia</i> <sup>e</sup>  | FC:PI |
| 195a | <i>Artemisia vulgaris</i> L. <sup>i</sup>                                      | Yes            | Asteraceae <sup>j</sup>    | E | 16°            | 2              | P              | 3,174  | 3.2  | 6.5  | 13.0 | 521               | O | G <sup>c</sup>               | FC:PI |
| 196a | <i>Artemisia vulgaris</i> L.                                                   | Yes            | Asteraceae <sup>j</sup>    | E | 36             | 4              | P              | 5,941  | 6.1  | 12.2 | 24.3 | 521               | O | G <sup>c</sup>               | FC:PI |
| 197c | <i>Asparagus officinalis</i> L.                                                | Yes            | Asparagaceae               | M | – <sup>n</sup> | – <sup>p</sup> | P              | 1,775  | 1.8  | 3.6  | 7.3  | 554               | O | <i>Raphanus</i> <sup>c</sup> | FC:PI |
| 198a | <i>Asparagus umbellatus</i> Link                                               | – <sup>m</sup> | Asparagaceae               | M | 20°            | 2              | P              | 1,252  | 1.3  | 2.6  | 5.1  | 477               | O | <i>Solan.</i> <sup>c</sup>   | FC:PI |
| 199a | <i>Aster tripolium</i> L.                                                      | Yes            | Asteraceae <sup>j</sup>    | E | 18°            | 2              | P              | 10,479 | 10.7 | 21.4 | 42.9 | 580               | O | G <sup>c</sup>               | CIA   |
| 200a | <i>Atractylis preauxiana</i> Sch. Bip.                                         | – <sup>m</sup> | Asteraceae <sup>j</sup>    | E | 20°            | 2              | P              | 3,897  | 4.0  | 8.0  | 15.9 | 552               | O | G <sup>c</sup>               | FC:PI |
| 201a | <i>Atriplex halimus</i> L. subsp. <i>halimus</i> <sup>i,aa</sup>               | No             | Amaranthaceae <sup>k</sup> | E | 18             | 2              | P              | 1,193  | 1.2  | 2.4  | 4.9  | 469               | O | <i>Solan.</i> <sup>c</sup>   | FC:PI |
| 202a | <i>Atriplex halimus</i> L. subsp. <i>schweinfurthii</i> <sup>h,aa</sup>        | No             | Amaranthaceae <sup>k</sup> | E | 36             | 4              | P              | 2,333  | 2.4  | 4.8  | 9.5  | 469               | O | <i>Solan.</i> <sup>c</sup>   | FC:PI |
| 202b | <i>Atriplex halimus</i> L. subsp. <i>schweinfurthii</i> <sup>h,aa</sup>        | No             | Amaranthaceae <sup>k</sup> | E | 36             | 4              | P              | 2,509  | 2.6  | 5.1  | 10.3 | 469               | O | <i>Solan.</i> <sup>c</sup>   | FC:PI |
| 203a | <i>Atriplex nummularia</i> Lindl.                                              | – <sup>m</sup> | Amaranthaceae              | E | – <sup>n</sup> | – <sup>p</sup> | P              | 2,924  | 3.0  | 6.0  | 12.0 | 526               | O | A                            | FC:PI |
| 204a | <i>Atriplex portulacoides</i> L.                                               | Yes            | Amaranthaceae              | E | 36°            | 4              | A              | 895    | 0.9  | 1.8  | 3.7  | 580               | O | G <sup>c</sup>               | CIA   |
| 205a | <i>Atriplex prostrata</i> Bouch. ex DC.                                        | Yes            | Amaranthaceae              | E | 18°            | 2              | A              | 738    | 0.8  | 1.5  | 3.0  | 580               | O | G <sup>c</sup>               | CIA   |
| 206c | <i>Atriplex rosea</i> L.                                                       | No             | Amaranthaceae <sup>k</sup> | E | – <sup>n</sup> | – <sup>p</sup> | A              | 1,037  | 1.1  | 2.1  | 4.2  | 492               | O | <i>Raphanus</i> <sup>c</sup> | FC:PI |
| 207a | <i>Atriplex semibaccata</i> R.Br.                                              | – <sup>m</sup> | Amaranthaceae              | E | – <sup>n</sup> | – <sup>p</sup> | P              | 831    | 0.9  | 1.7  | 3.4  | 526               | O | A                            | FC:PI |
| 208a | <i>Atriplex stipitata</i> <sup>1</sup>                                         | – <sup>m</sup> | Amaranthaceae              | E | – <sup>n</sup> | – <sup>p</sup> | – <sup>q</sup> | 900    | 0.9  | 1.8  | 3.7  | 526               | O | A                            | FC:PI |
| 209a | <i>Atriplex vesicaria</i> Heward ex Benth.                                     | – <sup>m</sup> | Amaranthaceae              | E | – <sup>n</sup> | – <sup>p</sup> | P              | 1,462  | 1.5  | 3.0  | 6.0  | 526               | O | A                            | FC:PI |
| 210a | <i>Aubrieta deltoidea</i> (L.) DC.                                             | Yes            | Brassicaceae <sup>j</sup>  | E | 16             | 2              | – <sup>q</sup> | 411    | 0.4  | 0.8  | 1.7  | 599               | O | L                            | FC:PI |
| 211a | <i>Australopyrum calcis</i> Connor & Molloy subsp. <i>calcis</i>               | Yes            | Poaceae <sup>j</sup>       | M | 14             | 2              | P              | 5,511  | 5.6  | 11.3 | 22.5 | 528               | O | – <sup>w</sup>               | FC:PI |
| 211b | <i>Australopyrum calcis</i> Connor & Molloy subsp. <i>optatum</i> <sup>i</sup> | Yes            | Poaceae <sup>j</sup>       | M | 14             | 2              | P              | 5,672  | 5.8  | 11.6 | 23.2 | 528               | O | – <sup>w</sup>               | FC:PI |
| 212a | <i>Austrodanthonia caespitosa</i> (Gaudich.) H.P.Linder                        | – <sup>m</sup> | Poaceae <sup>j</sup>       | M | – <sup>n</sup> | – <sup>p</sup> | P              | 2,910  | 3.0  | 6.0  | 11.9 | 526               | O | A                            | FC:PI |
| 213a | <i>Austrofestuca littoralis</i> (Labill.) E.B.Alexeev.                         | Yes            | Poaceae <sup>j</sup>       | M | 28°            | 4              | P              | 3,628  | 3.7  | 7.4  | 14.8 | 528               | O | – <sup>w</sup>               | FC:PI |
| 214a | <i>Austrostipa stipoides</i> (Hook.f.) S.W.L.Jacobs & J.Everett                | Yes            | Poaceae <sup>j</sup>       | M | 44             | 4              | P              | 1,540  | 1.6  | 3.2  | 6.3  | 528               | O | – <sup>w</sup>               | FC:PI |
| 215a | <i>Azorina vidalii</i> (H. C. Watson) Feer                                     | – <sup>m</sup> | Campanulaceae              | E | 56             | 8              | P              | 1,046  | 1.1  | 2.1  | 4.3  | 552               | O | <i>Solan.</i> <sup>c</sup>   | FC:PI |
| 216a | <i>Banksia marginata</i> <sup>1</sup>                                          | – <sup>m</sup> | Proteaceae                 | E | – <sup>n</sup> | – <sup>p</sup> | P              | 826    | 0.8  | 1.7  | 3.4  | 526               | O | A                            | FC:PI |
| 217a | <i>Barringtonia acutangula</i> (L.) Gaertn.                                    | No             | Lecythidaceae              | E | 26°            | 2              | P              | 1,117  | 1.1  | 2.3  | 4.6  | 501 <sup>ag</sup> | O | B <sup>c</sup>               | Fe    |
| 218a | <i>Basella alba</i> L.                                                         | No             | Basellaceae                | E | c. 48          | – <sup>p</sup> | P              | 1,753  | 1.8  | 3.6  | 7.2  | 612               | O | J                            | Fe    |
| 219a | <i>Bauhinia blakeana</i> Dunn.                                                 | No             | Fabaceae <sup>j</sup>      | E | – <sup>n</sup> | – <sup>p</sup> | P              | 582    | 0.6  | 1.2  | 2.4  | 501 <sup>ag</sup> | O | B <sup>c</sup>               | Fe    |
| 220a | <i>Bauhinia galpinii</i> N.E.Br.                                               | No             | Fabaceae <sup>j</sup>      | E | 28°            | 2              | P              | 641    | 0.7  | 1.3  | 2.6  | 501 <sup>ag</sup> | O | B <sup>c</sup>               | Fe    |

Continued

| Entry number <sup>g</sup> | Species                                                       | Voucher         | Family                     | Higher group <sup>#</sup> | 2n <sup>z</sup>     | Ploidy level (x) | Life cycle type <sup>s</sup> | DNA amount             |         |         |         | Original ref. <sup>a</sup> | Present amount <sup>f</sup> | Standard species <sup>*b1</sup> | Method <sup>††</sup> |
|---------------------------|---------------------------------------------------------------|-----------------|----------------------------|---------------------------|---------------------|------------------|------------------------------|------------------------|---------|---------|---------|----------------------------|-----------------------------|---------------------------------|----------------------|
|                           |                                                               |                 |                            |                           |                     |                  |                              | 1C (Mbp <sup>s</sup> ) | 1C (pg) | 2C (pg) | 4C (pg) |                            |                             |                                 |                      |
| 221a                      | <i>Bauhinia monandra</i> Kurz                                 | No              | Fabaceae <sup>j</sup>      | E                         | 24 <sup>o</sup>     | 2                | P                            | 699                    | 0.7     | 1.4     | 2.9     | 501 <sup>ag</sup>          | O                           | B <sup>c</sup>                  | Fe                   |
| 222a                      | <i>Beaucarnea recurvata</i> Lemaire                           | No              | Asparagaceae <sup>k</sup>  | M                         | 38 <sup>o</sup>     | — <sup>p</sup>   | P                            | 8,606                  | 8.8     | 17.6    | 35.2    | 482                        | O                           | <i>Agave</i> sp. <sup>e</sup>   | FC:PI                |
| 223a                      | <i>Berteroa incana</i> (L.) DC.                               | Yes             | Brassicaceae <sup>j</sup>  | E                         | 16                  | 2                | — <sup>q</sup>               | 694                    | 0.7     | 1.4     | 2.8     | 599                        | O                           | L                               | FC:PI                |
| 224f                      | <i>Beta vulgaris</i> L.                                       | Yes             | Amaranthaceae <sup>k</sup> | E                         | — <sup>n</sup>      | — <sup>p</sup>   | B                            | 900                    | 0.9     | 1.8     | 3.7     | 492                        | O                           | <i>Raphanus</i> <sup>e</sup>    | FC:PI                |
| 225a                      | <i>Betula alba</i> L.                                         | Yes             | Betulaceae                 | E                         | — <sup>n</sup>      | — <sup>p</sup>   | P                            | 880                    | 0.9     | 1.8     | 3.6     | 489                        | O                           | — <sup>w</sup>                  | FC:EB                |
| 226a                      | <i>Billbergia nutans</i> H.Wendl.                             | Yes             | Bromeliaceae               | M                         | 50 <sup>o</sup>     | 2                | P                            | 368                    | 0.4     | 0.8     | 1.5     | 571                        | O                           | <i>Glycine</i> <sup>e</sup>     | FC:PI                |
| 227a                      | <i>Biscutella auriculata</i> L.                               | Yes             | Brassicaceae <sup>j</sup>  | E                         | 16                  | 2                | — <sup>q</sup>               | 675                    | 0.7     | 1.4     | 2.8     | 599                        | O                           | L                               | FC:PI                |
| 228a                      | <i>Biscutella didyma</i> L.                                   | Yes             | Brassicaceae <sup>j</sup>  | E                         | 16 <sup>o</sup>     | 2                | A                            | 768                    | 0.8     | 1.6     | 3.1     | 522                        | O                           | <i>Raphanus</i> <sup>e</sup>    | FC:PI                |
| 229a                      | <i>Bituminaria bituminosa</i> (L.) C.H.Stirton <sup>h</sup>   | No              | Fabaceae <sup>j</sup>      | E                         | 20 <sup>o</sup>     | 2                | P                            | 488                    | 0.5     | 1.0     | 2.0     | 513 <sup>al</sup>          | O                           | <i>Glycine</i> <sup>e</sup>     | FC:PI                |
| 229b                      | <i>Bituminaria bituminosa</i> (L.) C.H.Stirton <sup>h</sup>   | No              | Fabaceae <sup>j</sup>      | E                         | 20 <sup>o</sup>     | 2                | P                            | 548                    | 0.6     | 1.1     | 2.2     | 513 <sup>al</sup>          | O                           | <i>Glycine</i> <sup>e</sup>     | FC:PI                |
| 230c                      | <i>Bixa orellana</i> L.                                       | No <sup>m</sup> | Bixaceae                   | E                         | 14 <sup>o</sup>     | 2                | P                            | 203                    | 0.2     | 0.4     | 0.8     | 501 <sup>ag</sup>          | O                           | B <sup>c</sup>                  | Fe                   |
| 231a                      | <i>Boechera hoelbellii</i> Hornem.                            | Yes             | Brassicaceae <sup>j</sup>  | E                         | 14, 21 <sup>o</sup> | — <sup>p</sup>   | — <sup>q</sup>               | 235                    | 0.2     | 0.5     | 1.0     | 599                        | O                           | L                               | FC:PI                |
| 232a                      | <i>Boechera stricta</i> (Graham) Al-Shehbaz                   | Yes             | Brassicaceae <sup>j</sup>  | E                         | 14, 21 <sup>o</sup> | — <sup>p</sup>   | — <sup>q</sup>               | 235                    | 0.2     | 0.5     | 1.0     | 599                        | O                           | L                               | FC:PI                |
| 233a                      | <i>Boreava orientalis</i> Jaub. & Spach                       | Yes             | Brassicaceae <sup>j</sup>  | E                         | 14                  | 2                | — <sup>q</sup>               | 362                    | 0.4     | 0.7     | 1.5     | 599                        | O                           | L                               | FC:PI                |
| 234a                      | <i>Bornmuellera tymphaea</i> Hausskn. <sup>i</sup>            | Yes             | Brassicaceae <sup>j</sup>  | E                         | 16 <sup>o</sup>     | 2                | B                            | 1,066                  | 1.1     | 2.2     | 4.4     | 540                        | O                           | <i>Raphanus</i> <sup>e</sup>    | FC:PI                |
| 235a                      | <i>Bosea yervamora</i> L.                                     | — <sup>m</sup>  | Amaranthaceae              | E                         | 36                  | 4                | P                            | 1,609                  | 1.6     | 3.3     | 6.6     | 552                        | O                           | <i>Glycine</i> <sup>e</sup>     | FC:PI                |
| 236a                      | <i>Brachanthemum titovii</i> H.Kraschen.                      | Yes             | Asteraceae <sup>j</sup>    | E                         | 18 <sup>o</sup>     | 2                | P                            | 3,413                  | 3.5     | 7.0     | 14.0    | 521                        | O                           | G <sup>c</sup>                  | FC:PI                |
| 237b                      | <i>Brachycome dichromosomatica</i> C.R.Carter                 | No              | Asteraceae <sup>j</sup>    | E                         | — <sup>n</sup>      | — <sup>p</sup>   | A                            | 1,507                  | 1.5     | 3.1     | 6.2     | 518                        | O                           | <i>Raphanus</i> <sup>e</sup>    | FC:PI                |
| 238a                      | <i>Brachypodium arbuscula</i> Knoche                          | — <sup>m</sup>  | Poaceae <sup>j</sup>       | M                         | 18                  | 2                | P                            | 337                    | 0.3     | 0.7     | 1.4     | 552                        | O                           | <i>Raphanus</i> <sup>e</sup>    | FC:PI                |
| 239d                      | <i>Brachypodium distachyon</i> (L.) P.Beauv.                  | No              | Poaceae <sup>j</sup>       | M                         | — <sup>n</sup>      | — <sup>p</sup>   | A                            | 768                    | 0.8     | 1.6     | 3.1     | 518                        | O                           | <i>Glycine</i> <sup>e</sup>     | FC:PI                |
| 239e                      | <i>Brachypodium distachyon</i> (L.) P.Beauv. inbred line Bd21 | No              | Poaceae                    | M                         | 10                  | 2                | A                            | 271                    | 0.3     | 0.6     | 1.1     | 615                        | O                           | — <sup>ax</sup>                 | GS                   |
| 240b                      | <i>Brachypodium sylvaticum</i> (Huds.) P.Beauv.               | No              | Poaceae <sup>j</sup>       | M                         | — <sup>n</sup>      | — <sup>p</sup>   | P                            | 529                    | 0.5     | 1.1     | 2.2     | 518                        | O                           | <i>Glycine</i> <sup>e</sup>     | FC:PI                |
| 241c                      | <i>Brassia maculata</i> R.Br.                                 | Yes             | Orchidaceae                | M                         | — <sup>n</sup>      | — <sup>p</sup>   | P                            | 3,619                  | 3.7     | 7.4     | 14.8    | 504 <sup>ah</sup>          | O                           | — <sup>w</sup>                  | FC:DAPI              |
| 242b                      | <i>Brassica carinata</i> L.                                   | — <sup>m</sup>  | Brassicaceae <sup>j</sup>  | E                         | 34 <sup>o</sup>     | 4                | A                            | 1,279                  | 1.3     | 2.6     | 5.2     | 509                        | O                           | — <sup>w</sup>                  | FC:PI                |
| 243c                      | <i>Brassica juncea</i> (L.) Czern.                            | — <sup>m</sup>  | Brassicaceae <sup>j</sup>  | E                         | 36 <sup>o</sup>     | 4                | — <sup>q</sup>               | 1,068                  | 1.1     | 2.2     | 4.4     | 509                        | O                           | — <sup>w</sup>                  | FC:PI                |
| 244f                      | <i>Brassica napus</i> L.                                      | No              | Brassicaceae <sup>j</sup>  | E                         | — <sup>n</sup>      | — <sup>p</sup>   | AB                           | 1,443                  | 1.5     | 3.0     | 5.9     | 492                        | O                           | <i>Raphanus</i> <sup>e</sup>    | FC:PI                |
| 244g                      | <i>Brassica napus</i> L.                                      | — <sup>m</sup>  | Brassicaceae <sup>j</sup>  | E                         | 38 <sup>o</sup>     | 4                | — <sup>q</sup>               | 1,129                  | 1.2     | 2.3     | 4.6     | 509                        | O                           | — <sup>w</sup>                  | FC:PI                |
| 245c                      | <i>Brassica nigra</i> (L.) Koch                               | — <sup>m</sup>  | Brassicaceae <sup>j</sup>  | E                         | 16 <sup>o</sup>     | 2                | A                            | 633                    | 0.6     | 1.3     | 2.6     | 509                        | O                           | — <sup>w</sup>                  | FC:PI                |
| 246h                      | <i>Brassica oleracea</i> L.                                   | — <sup>m</sup>  | Brassicaceae <sup>j</sup>  | E                         | 18 <sup>o</sup>     | — <sup>p</sup>   | BP                           | 694                    | 0.7     | 1.4     | 2.8     | 509                        | O                           | — <sup>w</sup>                  | FC:PI                |
| 247b                      | <i>Brassica rapa</i> L.                                       | — <sup>m</sup>  | Brassicaceae <sup>j</sup>  | E                         | 20 <sup>o</sup>     | — <sup>p</sup>   | B                            | 527                    | 0.5     | 1.1     | 2.2     | 509                        | O                           | — <sup>w</sup>                  | FC:PI                |
| 248a                      | <i>Brocchinia acuminata</i> L.B.Sm.                           | Yes             | Bromeliaceae               | M                         | — <sup>n</sup>      | — <sup>p</sup>   | P                            | 372                    | 0.4     | 0.8     | 1.5     | 575                        | O                           | <i>Raphanus</i> <sup>e</sup>    | FC:PI                |
| 249a                      | <i>Brocchinia tatei</i> L.B.Sm.                               | Yes             | Bromeliaceae               | M                         | — <sup>n</sup>      | — <sup>p</sup>   | P                            | 381                    | 0.4     | 0.8     | 1.6     | 575                        | O                           | <i>Raphanus</i> <sup>e</sup>    | FC:PI                |

|      |                                                                     |                  |                             |   |                 |                |                |       |     |      |      |                   |   |                               |       |
|------|---------------------------------------------------------------------|------------------|-----------------------------|---|-----------------|----------------|----------------|-------|-----|------|------|-------------------|---|-------------------------------|-------|
| 250a | <i>Brocchinia uaipanensis</i> (Maguire) Givnish                     | Yes              | Bromeliaceae                | M | – <sup>n</sup>  | – <sup>P</sup> | P              | 421   | 0.4 | 0.9  | 1.7  | 575               | O | <i>Raphanus</i> <sup>c</sup>  | FC:PI |
| 251a | <i>Bromus arenarius</i> Labill.                                     | Yes              | Poaceae <sup>j</sup>        | M | 28              | 4              | P              | 8,044 | 8.2 | 16.5 | 32.9 | 528               | O | – <sup>w</sup>                | FC:PI |
| 252a | <i>Bromus ciliatus</i> L.                                           | No <sup>m1</sup> | Poaceae <sup>j</sup>        | M | 28              | 4              | P              | 9,355 | 9.6 | 19.1 | 38.3 | 595               | O | A <sup>c</sup>                | FC:PI |
| 253a | <i>Bromus erectus</i> Huds.                                         | No <sup>m1</sup> | Poaceae <sup>j</sup>        | M | 14              | 2              | P              | 3,027 | 3.1 | 6.2  | 12.4 | 594               | O | F <sup>c</sup>                | FC:PI |
| 254a | <i>Bromus variegatus</i> M.Bieb.                                    | No <sup>m1</sup> | Poaceae <sup>j</sup>        | M | 14              | 2              | P              | 3,306 | 3.4 | 6.8  | 13.5 | 594               | O | F <sup>c</sup>                | FC:PI |
| 255a | <i>Bryonia verrucosa</i> Dryand.                                    | – <sup>m</sup>   | Cucurbitaceae               | E | 20 <sup>o</sup> | 2              | P              | 1,022 | 1.0 | 2.1  | 4.2  | 552               | O | <i>Solan.</i> <sup>c</sup>    | FC:PI |
| 256c | <i>Bunias erucago</i> L.                                            | Yes              | Brassicaceae <sup>j</sup>   | E | 14              | 2              | A              | 2,024 | 2.1 | 4.1  | 8.3  | 599               | O | L                             | FC:PI |
| 257c | <i>Bunias orientalis</i> L.                                         | Yes              | Brassicaceae <sup>j</sup>   | E | 14              | 2              | P              | 2,377 | 2.4 | 4.9  | 9.7  | 599               | O | L                             | FC:PI |
| 258a | <i>Bupleurum salicifolium</i> R.Br in Buch subsp. <i>aciphyllum</i> | – <sup>m</sup>   | Apiaceae <sup>j</sup>       | E | 32 <sup>o</sup> | 4              | P              | 773   | 0.8 | 1.6  | 3.2  | 477               | O | <i>Solan.</i> <sup>c</sup>    | FC:PI |
| 259a | <i>Butea monosperma</i> (Lam.) Taub.                                | No               | Fabaceae <sup>j</sup>       | E | 18 <sup>o</sup> | 2              | P              | 548   | 0.6 | 1.1  | 2.2  | 501 <sup>ag</sup> | O | B <sup>c</sup>                | Fe    |
| 260a | <i>Bystropogon canariensis</i> (L.) L'Hér.                          | – <sup>m</sup>   | Lamiaceae <sup>j</sup>      | E | 42 <sup>o</sup> | 6              | P              | 538   | 0.6 | 1.1  | 2.2  | 552               | O | <i>Solan.</i> <sup>c</sup>    | FC:PI |
| 261a | <i>Caesalpinia mexicana</i> A.Gray                                  | No               | Fabaceae <sup>j</sup>       | E | – <sup>n</sup>  | – <sup>P</sup> | P              | 1,958 | 2.0 | 4.0  | 8.0  | 501 <sup>ag</sup> | O | B <sup>c</sup>                | Fe    |
| 262a | <i>Caesalpinia pulcherrima</i> (L.) Sw.                             | No               | Fabaceae <sup>j</sup>       | E | 28 <sup>o</sup> | 2              | P              | 1,760 | 1.8 | 3.6  | 7.2  | 501 <sup>ag</sup> | O | B <sup>c</sup>                | Fe    |
| 263a | <i>Cakile maritima</i> Scop.                                        | Yes              | Brassicaceae <sup>j</sup>   | E | 18              | – <sup>P</sup> | – <sup>q</sup> | 665   | 0.7 | 1.4  | 2.7  | 599               | O | L                             | FC:PI |
| 264a | <i>Calandrinia polyandra</i> (Hook.) Benth.                         | – <sup>m</sup>   | Portulacaceae               | E | – <sup>n</sup>  | – <sup>P</sup> | A              | 1,046 | 1.1 | 2.1  | 4.3  | 526               | O | A                             | FC:PI |
| 265a | <i>Calepina irregularis</i> (Asso) Thell.                           | Yes              | Brassicaceae <sup>j</sup>   | E | 14              | 2              | AB             | 205   | 0.2 | 0.4  | 0.8  | 599               | O | L                             | FC:PI |
| 266b | <i>Calibanus hookeri</i> (Lemaire) Trelease                         | No               | Asparagaceae <sup>k</sup>   | M | 38 <sup>o</sup> | – <sup>P</sup> | P              | 8,851 | 9.1 | 18.1 | 36.2 | 482               | O | <i>Agave</i> sp. <sup>c</sup> | FC:PI |
| 267c | <i>Camassia cusickii</i> S.Watson                                   | No               | Asparagaceae <sup>k</sup>   | M | 30 <sup>o</sup> | – <sup>P</sup> | P              | 2,249 | 2.3 | 4.6  | 9.2  | 482               | O | <i>Agave</i> sp. <sup>c</sup> | FC:PI |
| 268a | <i>Campanula americana</i> L. <sup>h</sup>                          | No               | Campanulaceae               | E | 58              | 4              | AB             | 2,015 | 2.1 | 4.1  | 8.2  | 486               | O | <i>Gallus</i> <sup>f</sup>    | FC:PI |
| 268b | <i>Campanula americana</i> L. <sup>h</sup>                          | No               | Campanulaceae               | E | 58              | 4              | AB             | 2,166 | 2.2 | 4.4  | 8.9  | 486               | O | <i>Gallus</i> <sup>f</sup>    | FC:PI |
| 269a | <i>Campylanthus salsoloides</i> (L. f.) Roth                        | – <sup>m</sup>   | Plantaginaceae <sup>k</sup> | E | 14 <sup>o</sup> | 2              | P              | 743   | 0.8 | 1.5  | 3.0  | 552               | O | <i>Solan.</i> <sup>c</sup>    | FC:PI |
| 270a | <i>Canarina canariensis</i> (L.) Vatke                              | – <sup>m</sup>   | Campanulaceae               | E | 34 <sup>o</sup> | 4              | P              | 2,792 | 2.9 | 5.7  | 11.4 | 477               | O | G <sup>c</sup>                | FC:PI |
| 271a | <i>Capsella bursa-pastoris</i> (L.) Medic.                          | Yes              | Brassicaceae <sup>j</sup>   | E | 32              | 4              | A              | 391   | 0.4 | 0.8  | 1.6  | 599               | O | L                             | FC:PI |
| 271b | <i>Capsella bursa-pastoris</i> (L.) Medic.                          | – <sup>m</sup>   | Brassicaceae <sup>j</sup>   | E | 32              | 4              | A              | 405   | 0.4 | 0.8  | 1.7  | 509               | O | – <sup>w</sup>                | FC:PI |
| 272a | <i>Capsella rubella</i> Reuter                                      | Yes              | Brassicaceae <sup>j</sup>   | E | 16              | 2              | – <sup>q</sup> | 215   | 0.2 | 0.4  | 0.9  | 599               | O | L                             | FC:PI |
| 272b | <i>Capsella rubella</i> Reuter                                      | – <sup>m</sup>   | Brassicaceae <sup>j</sup>   | E | 16              | 2              | – <sup>q</sup> | 251   | 0.3 | 0.5  | 1.0  | 509               | O | – <sup>w</sup>                | FC:PI |
| 273a | <i>Capsicum annuum</i> L. var. <i>annuum</i>                        | Yes              | Solanaceae                  | E | 24 <sup>o</sup> | 2              | AB             | 3,090 | 3.2 | 6.3  | 12.6 | 481               | O | F <sup>c</sup>                | Fe    |
| 273j | <i>Capsicum annuum</i> L. var. <i>annuum</i> <sup>i</sup>           | Yes              | Solanaceae                  | E | 24 <sup>o</sup> | 2              | AB             | 3,306 | 3.4 | 6.8  | 13.5 | 481               | O | F <sup>c</sup>                | FC:EB |
| 274a | <i>Capsicum baccatum</i> L. var. <i>baccatum</i>                    | Yes              | Solanaceae                  | E | 24 <sup>o</sup> | 2              | P              | 3,628 | 3.7 | 7.4  | 14.8 | 481               | O | F <sup>c</sup>                | FC:EB |
| 274f | <i>Capsicum baccatum</i> L. var. <i>pendulum</i> <sup>i</sup>       | Yes              | Solanaceae                  | E | 24 <sup>o</sup> | 2              | P              | 3,599 | 3.7 | 7.4  | 14.7 | 481               | O | F <sup>c</sup>                | FC:EB |
| 274g | <i>Capsicum baccatum</i> L. var. <i>umbilicatum</i> <sup>i</sup>    | Yes              | Solanaceae                  | E | 24 <sup>o</sup> | 2              | P              | 3,628 | 3.7 | 7.4  | 14.8 | 481               | O | F <sup>c</sup>                | FC:EB |

Continued

| Entry number <sup>g</sup> | Species                                                                   | Voucher        | Family                    | Higher group <sup>#</sup> | 2n <sup>‡</sup> | Ploidy level (x) | Life cycle type <sup>§</sup> | DNA amount             |                |         |         | Original ref. <sup>a</sup> | Present amount <sup>†</sup> | Standard species* <sup>b1</sup> | Method <sup>††</sup> |
|---------------------------|---------------------------------------------------------------------------|----------------|---------------------------|---------------------------|-----------------|------------------|------------------------------|------------------------|----------------|---------|---------|----------------------------|-----------------------------|---------------------------------|----------------------|
|                           |                                                                           |                |                           |                           |                 |                  |                              | 1C (Mbp <sup>b</sup> ) | 1C (pg)        | 2C (pg) | 4C (pg) |                            |                             |                                 |                      |
| 275a                      | <i>Capsicum campylopodium</i> Sendtn. (cytotype 2) <sup>h</sup>           | Yes            | Solanaceae                | E                         | 26 <sup>o</sup> | 2                | – <sup>q</sup>               | 4,430                  | 4.5            | 9.1     | 18.1    | 481                        | O                           | F <sup>c</sup>                  | FC:EB                |
| 275b                      | <i>Capsicum campylopodium</i> Sendtn. (cytotype 1) <sup>h</sup>           | Yes            | Solanaceae                | E                         | 26 <sup>o</sup> | 2                | – <sup>q</sup>               | 5,614                  | 5.7            | 11.5    | 23.0    | 481                        | O                           | F <sup>c</sup>                  | FC:EB                |
| 276b                      | <i>Capsicum chacoense</i> Hunz. <sup>i</sup>                              | Yes            | Solanaceae                | E                         | 24 <sup>o</sup> | 2                | – <sup>q</sup>               | 3,276                  | 3.4            | 6.7     | 13.4    | 481                        | O                           | F <sup>c</sup>                  | FC:EB                |
| 277a                      | <i>Capsicum chinense</i> Jacq. <sup>i</sup>                               | Yes            | Solanaceae                | E                         | 24 <sup>o</sup> | 2                | – <sup>q</sup>               | 3,345                  | 3.4            | 6.8     | 13.7    | 481                        | O                           | F <sup>c</sup>                  | FC:EB                |
| 278a                      | <i>Capsicum eximium</i> Hunz. <sup>i</sup>                                | Yes            | Solanaceae                | E                         | 24 <sup>o</sup> | 2                | – <sup>q</sup>               | 3,971                  | 4.1            | 8.1     | 16.2    | 481                        | O                           | F <sup>c</sup>                  | FC:EB                |
| 279a                      | <i>Capsicum frutescens</i> L.                                             | Yes            | Solanaceae                | E                         | 24 <sup>o</sup> | 2                | – <sup>q</sup>               | 3,325                  | 3.4            | 6.8     | 13.6    | 481                        | O                           | F <sup>c</sup>                  | FC:EB                |
| 279c                      | <i>Capsicum frutescens</i> L.                                             | Yes            | Solanaceae                | E                         | – <sup>n</sup>  | – <sup>p</sup>   | A                            | 3,604                  | 3.7            | 7.4     | 14.7    | 492                        | O                           | G <sup>c</sup>                  | FC:PI                |
| 280a                      | <i>Capsicum parvifolium</i> Sendtn.                                       | Yes            | Solanaceae                | E                         | 24 <sup>o</sup> | 2                | – <sup>q</sup>               | 5,643                  | 5.8            | 11.5    | 23.1    | 481                        | O                           | F <sup>c</sup>                  | FC:EB                |
| 281a                      | <i>Capsicum pubescens</i> Ruiz. & Pav. <sup>i</sup>                       | Yes            | Solanaceae                | E                         | 24 <sup>o</sup> | 2                | – <sup>q</sup>               | 4,372                  | 4.5            | 8.9     | 17.9    | 481                        | O                           | F <sup>c</sup>                  | FC:EB                |
| 281b                      | <i>Capsicum pubescens</i> Ruiz. & Pav.                                    | Yes            | Solanaceae                | E                         | 24 <sup>o</sup> | 2                | – <sup>q</sup>               | 4,460                  | 4.6            | 9.1     | 18.2    | 481                        | O                           | F <sup>c</sup>                  | Fe                   |
| 282c                      | <i>Cardamine amara</i> L.                                                 | No             | Brassicaceae <sup>j</sup> | E                         | – <sup>n</sup>  | – <sup>p</sup>   | P                            | 289                    | 0.3            | 0.6     | 1.2     | 518                        | O                           | <i>Raphanus</i> <sup>c</sup>    | FC:PI                |
| 282d                      | <i>Cardamine amara</i> L.                                                 | – <sup>m</sup> | Brassicaceae <sup>j</sup> | E                         | 16 <sup>o</sup> | – <sup>p</sup>   | – <sup>q</sup>               | 220                    | 0.2            | 0.5     | 0.9     | 509                        | O                           | – <sup>w</sup>                  | FC:PI                |
| 282e                      | <i>Cardamine amara</i> L. subsp. <i>amara</i>                             | Yes            | Brassicaceae <sup>j</sup> | E                         | 16              | 2                | P                            | 245                    | 0.3            | 0.5     | 1.0     | 537                        | O                           | <i>Solan.</i> <sup>c</sup>      | FC:PI                |
| 283a                      | <i>Cardamine asarifolia</i> L. <sup>i</sup>                               | Yes            | Brassicaceae <sup>j</sup> | E                         | 48              | 6                | P                            | 1,306                  | 1.3            | 2.7     | 5.3     | 537                        | O                           | <i>Solan.</i> <sup>c</sup>      | FC:PI                |
| 284b                      | <i>Cardamine hirsuta</i> L.                                               | – <sup>m</sup> | Brassicaceae <sup>j</sup> | E                         | 16              | – <sup>p</sup>   | – <sup>q</sup>               | 224                    | 0.2            | 0.5     | 0.9     | 509                        | O                           | – <sup>w</sup>                  | FC:PI                |
| 285a                      | <i>Cardamine impatiens</i> L.                                             | – <sup>m</sup> | Brassicaceae <sup>j</sup> | E                         | 16              | – <sup>p</sup>   | – <sup>q</sup>               | 207                    | 0.2            | 0.4     | 0.8     | 509                        | O                           | – <sup>w</sup>                  | FC:PI                |
| 286a                      | <i>Cardamine</i> × <i>ferrarii</i> Burnat                                 | Yes            | Brassicaceae <sup>j</sup> | E                         | c. 40           | 5                | P                            | – <sup>t</sup>         | – <sup>t</sup> | 2.0     | 4.0     | 537                        | O                           | <i>Glycine</i> <sup>e</sup>     | FC:PI                |
| 287a                      | <i>Cardaminopsis arenosa</i> (L.) Hayek                                   | No             | Brassicaceae <sup>j</sup> | E                         | – <sup>n</sup>  | – <sup>p</sup>   | AP                           | 489                    | 0.5            | 1.0     | 2.0     | 518                        | O                           | <i>Raphanus</i> <sup>c</sup>    | FC:PI                |
| 288a                      | <i>Cardiocrinum giganteum</i> (Wall.) Makino                              | Yes            | Liliaceae                 | M                         | 24              | 2                | P                            | 37,775                 | 38.6           | 77.3    | 154.5   | 565                        | O                           | B                               | Fe                   |
| 289c                      | <i>Carica papaya</i> L.                                                   | No             | Caricaceae                | E                         | 18 <sup>o</sup> | 2                | P                            | 403                    | 0.4            | 0.8     | 1.7     | 501 <sup>abg</sup>         | O                           | B <sup>c</sup>                  | Fe                   |
| 290a                      | <i>Carlina salicifolia</i> (L. f.) Cav.                                   | – <sup>m</sup> | Asteraceae <sup>j</sup>   | E                         | 20 <sup>o</sup> | 2                | P                            | 3,413                  | 3.5            | 7.0     | 14.0    | 552                        | O                           | H <sup>c</sup>                  | FC:PI                |
| 291a                      | <i>Carlina xeranthemoides</i> L.f.                                        | – <sup>m</sup> | Asteraceae <sup>j</sup>   | E                         | 20              | 2                | P                            | 3,477                  | 3.6            | 7.1     | 14.2    | 477                        | O                           | H <sup>c</sup>                  | FC:PI                |
| 292a                      | <i>Carrichtera annua</i> (L.) DC.                                         | Yes            | Brassicaceae <sup>j</sup> | E                         | 16              | 2                | – <sup>q</sup>               | 655                    | 0.7            | 1.3     | 2.7     | 599                        | O                           | L                               | FC:PI                |
| 293a                      | <i>Carthamus alexandrinus</i> (Boiss. & Heldr.) Asch. <sup>i</sup>        | Yes            | Asteraceae <sup>j</sup>   | E                         | 20              | 2                | A                            | 1,496                  | 1.5            | 3.1     | 6.1     | 536                        | O                           | G <sup>c</sup>                  | FC:PI                |
| 294a                      | <i>Carthamus anatolicus</i> (Boiss.) G.Samuelsson in Rech.f. <sup>i</sup> | Yes            | Asteraceae <sup>j</sup>   | E                         | 20              | 2                | A                            | 1,462                  | 1.5            | 3.0     | 6.0     | 536                        | O                           | G <sup>c</sup>                  | FC:PI                |
| 295a                      | <i>Carthamus boissieri</i> Halácsy <sup>i</sup>                           | Yes            | Asteraceae <sup>j</sup>   | E                         | 20              | 2                | A                            | 1,443                  | 1.5            | 3.0     | 5.9     | 536                        | O                           | G <sup>c</sup>                  | FC:PI                |
| 296a                      | <i>Carthamus creticus</i> L. <sup>i</sup>                                 | Yes            | Asteraceae <sup>j</sup>   | E                         | 64              | 6                | A                            | 3,452                  | 3.5            | 7.1     | 14.1    | 536                        | O                           | <i>Petunia</i> <sup>c</sup>     | FC:PI                |

|      |                                                                                         |                |                           |   |                 |                |                |       |     |      |      |                   |   |                              |       |
|------|-----------------------------------------------------------------------------------------|----------------|---------------------------|---|-----------------|----------------|----------------|-------|-----|------|------|-------------------|---|------------------------------|-------|
| 297a | <i>Carthamus dentatus</i> (Link) Hanelt subsp. <i>ruber</i>                             | Yes            | Asteraceae <sup>j</sup>   | E | 20              | 2              | A              | 1,320 | 1.4 | 2.7  | 5.4  | 536               | O | G <sup>c</sup>               | FC:PI |
| 298a | <i>Carthamus glaucus</i> M.Bieb. subsp. <i>glaucus</i>                                  | Yes            | Asteraceae <sup>j</sup>   | E | 20              | 2              | A              | 1,467 | 1.5 | 3.0  | 6.0  | 536               | O | G <sup>c</sup>               | FC:PI |
| 299a | <i>Carthamus gypsicola</i> Iljin                                                        | Yes            | Asteraceae <sup>j</sup>   | E | 24              | 2              | A              | 1,325 | 1.4 | 2.7  | 5.4  | 536               | O | G <sup>c</sup>               | FC:PI |
| 300a | <i>Carthamus lanatus</i> L.                                                             | Yes            | Asteraceae <sup>j</sup>   | E | 44              | 4              | A              | 2,347 | 2.4 | 4.8  | 9.6  | 536               | O | G <sup>c</sup>               | FC:PI |
| 300b | <i>Carthamus lanatus</i> L. subsp. <i>montanus</i>                                      | Yes            | Asteraceae <sup>j</sup>   | E | 44              | 4              | A              | 2,362 | 2.4 | 4.8  | 9.7  | 536               | O | G <sup>c</sup>               | FC:PI |
| 301a | <i>Carthamus leucocaulos</i> Sibth. & Sm.                                               | Yes            | Asteraceae <sup>j</sup>   | E | 20              | 2              | A              | 1,105 | 1.1 | 2.3  | 4.5  | 536               | O | G <sup>c</sup>               | FC:PI |
| 302a | <i>Carthamus nitidus</i> Boiss.                                                         | Yes            | Asteraceae <sup>j</sup>   | E | 24              | 2              | A              | 1,193 | 1.2 | 2.4  | 4.9  | 536               | O | G <sup>c</sup>               | FC:PI |
| 303a | <i>Carthamus oxyacantha</i> M. Bieb. <sup>i</sup>                                       | Yes            | Asteraceae <sup>j</sup>   | E | 24              | 2              | A              | 1,281 | 1.3 | 2.6  | 5.2  | 536               | O | G <sup>c</sup>               | FC:PI |
| 304a | <i>Carthamus palaestinus</i> Eig                                                        | Yes            | Asteraceae <sup>j</sup>   | E | 24              | 2              | A              | 1,379 | 1.4 | 2.8  | 5.6  | 536               | O | G <sup>c</sup>               | FC:PI |
| 305a | <i>Carthamus persicus</i> Desf. ex Willd.                                               | Yes            | Asteraceae <sup>j</sup>   | E | 24              | 2              | A              | 1,296 | 1.3 | 2.7  | 5.3  | 536               | O | G <sup>c</sup>               | FC:PI |
| 306a | <i>Carthamus tenuis</i> (Boiss. & Blanche) Bornm.                                       | Yes            | Asteraceae <sup>j</sup>   | E | 20              | 2              | A              | 1,340 | 1.4 | 2.7  | 5.5  | 536               | O | G <sup>c</sup>               | FC:PI |
| 307a | <i>Carthamus tinctorius</i> L. <sup>i</sup>                                             | Yes            | Asteraceae <sup>j</sup>   | E | 24              | 2              | A              | 1,364 | 1.4 | 2.8  | 5.6  | 536               | O | G <sup>c</sup>               | FC:PI |
| 308a | <i>Carthamus turkestanicus</i> Popov <sup>i</sup>                                       | Yes            | Asteraceae <sup>j</sup>   | E | 64              | 6              | A              | 3,648 | 3.7 | 7.5  | 14.9 | 536               | O | G <sup>c</sup>               | FC:PI |
| 309a | <i>Casearia bowrdillonii</i> Mukherjee                                                  | No             | Salicaceae <sup>k</sup>   | E | – <sup>n</sup>  | – <sup>p</sup> | P              | 614   | 0.6 | 1.3  | 2.5  | 501 <sup>ag</sup> | O | B <sup>c</sup>               | Fe    |
| 310a | <i>Castanea sativa</i> Miller                                                           | No             | Fagaceae                  | E | – <sup>n</sup>  | – <sup>p</sup> | P              | 958   | 1.0 | 2.0  | 3.9  | 492               | O | <i>Raphanus</i> <sup>c</sup> | FC:PI |
| 310b | <i>Castanea sativa</i> Miller                                                           | Yes            | Fagaceae                  | E | – <sup>n</sup>  | – <sup>p</sup> | P              | 753   | 0.8 | 1.5  | 3.1  | 489               | O | – <sup>w</sup>               | FC:EB |
| 311a | <i>Castellia tuberculosa</i> (Moris) Bor                                                | – <sup>m</sup> | Poaceae <sup>j</sup>      | M | 14 <sup>o</sup> | 2              | P              | 3,087 | 3.2 | 6.3  | 12.6 | 555               | O | G <sup>c</sup>               | FC:PI |
| 312a | <i>Caulanthus amplexicaulis</i> S.Wats var. <i>barbarae</i>                             | – <sup>m</sup> | Brassicaceae <sup>j</sup> | E | 28 <sup>o</sup> | – <sup>p</sup> | A              | 369   | 0.4 | 0.8  | 1.5  | 509               | O | – <sup>w</sup>               | FC:PI |
| 313a | <i>Caulanthus heterophyllus</i> (Nutt.) Payson var. <i>pseudosimulans</i> R.Buck        | – <sup>m</sup> | Brassicaceae <sup>j</sup> | E | 28 <sup>o</sup> | – <sup>p</sup> | – <sup>q</sup> | 672   | 0.7 | 1.4  | 2.7  | 509               | O | – <sup>w</sup>               | FC:PI |
| 313b | <i>Caulanthus heterophyllus</i> (Nutt.) Payson var. <i>heterophyllus</i>                | – <sup>m</sup> | Brassicaceae <sup>j</sup> | E | 28 <sup>o</sup> | – <sup>p</sup> | – <sup>q</sup> | 686   | 0.7 | 1.4  | 2.8  | 509               | O | – <sup>w</sup>               | FC:PI |
| 314a | <i>Ceballosia fruticosa</i> (Lam.) G. Kunkel (L. f.) G. Kunkel var. <i>angustifolia</i> | – <sup>m</sup> | Boraginaceae              | E | 16 <sup>o</sup> | 2              | P              | 1,159 | 1.2 | 2.4  | 4.7  | 552               | O | <i>Solan.</i> <sup>c</sup>   | FC:PI |
| 315a | <i>Ceiba pentandra</i> (L.) Gaertn.                                                     | No             | Malvaceae                 | E | 86 <sup>o</sup> | 2              | P              | 1,712 | 1.8 | 3.5  | 7.0  | 501 <sup>ag</sup> | O | A <sup>c</sup>               | Fe    |
| 316b | <i>Celtis australis</i> L.                                                              | No             | Cannabaceae <sup>k</sup>  | E | – <sup>n</sup>  | – <sup>p</sup> | P              | 1,203 | 1.2 | 2.5  | 4.9  | 585               | O | H <sup>c</sup>               | FC:PI |
| 317a | <i>Cenchrus caliculatus</i> Cav.                                                        | Yes            | Poaceae <sup>j</sup>      | M | 102             | 6              | A              | 5,438 | 5.6 | 11.1 | 22.2 | 528               | O | – <sup>w</sup>               | FC:PI |
| 318a | <i>Centaurea alba</i> L.                                                                | Yes            | Asteraceae <sup>j</sup>   | E | 36              | 4              | P              | 1,751 | 1.8 | 3.6  | 7.2  | 529               | O | G <sup>c</sup>               | CIA   |
| 319a | <i>Centaurea arenaria</i> Bieb. ex Willd.                                               | Yes            | Asteraceae <sup>j</sup>   | E | 32              | 4              | P              | 1,604 | 1.6 | 3.3  | 6.6  | 529               | O | G <sup>c</sup>               | CIA   |
| 320a | <i>Centaurea cuneifolia</i> Sibth. & Sm.                                                | Yes            | Asteraceae <sup>j</sup>   | E | 18              | 2              | P              | 870   | 0.9 | 1.8  | 3.6  | 529               | O | G <sup>c</sup>               | CIA   |
| 321a | <i>Centaurea cuneifolia</i> Sibth. & Sm.                                                | Yes            | Asteraceae <sup>j</sup>   | E | 36              | 4              | P              | 1,584 | 1.6 | 3.2  | 6.5  | 529               | O | G <sup>c</sup>               | CIA   |
| 322a | <i>Centaurea cuspidata</i> Vis. <sup>i</sup>                                            | Yes            | Asteraceae <sup>j</sup>   | E | 18              | 2              | P              | 1,061 | 1.1 | 2.2  | 4.3  | 598               | O | <i>Petunia</i> <sup>c</sup>  | FC:PI |

Continued

| Entry number <sup>e</sup> | Species                                                                 | Voucher | Family                  | Higher group <sup>#</sup> | 2n <sup>‡</sup> | Ploidy level (x) | Life cycle type <sup>§</sup> | DNA amount             |         |         |         | Original ref. <sup>a</sup> | Present amount <sup>†</sup> | Standard species <sup>*b1</sup> | Method <sup>††</sup> |
|---------------------------|-------------------------------------------------------------------------|---------|-------------------------|---------------------------|-----------------|------------------|------------------------------|------------------------|---------|---------|---------|----------------------------|-----------------------------|---------------------------------|----------------------|
|                           |                                                                         |         |                         |                           |                 |                  |                              | 1C (Mbp <sup>b</sup> ) | 1C (pg) | 2C (pg) | 4C (pg) |                            |                             |                                 |                      |
| 323a                      | <i>Centaurea davidovii</i> Urumov                                       | Yes     | Asteraceae <sup>j</sup> | E                         | 44              | 4                | P                            | 2,022                  | 2.1     | 4.1     | 8.3     | 529                        | O                           | G <sup>c</sup>                  | CIA                  |
| 324a                      | <i>Centaurea debeauxii</i> Gren. & Gordon                               | Yes     | Asteraceae <sup>j</sup> | E                         | 44              | 4                | P                            | 2,103                  | 2.2     | 4.3     | 8.6     | 529                        | O                           | G <sup>c</sup>                  | CIA                  |
| 325a                      | <i>Centaurea deusta</i> Ten.                                            | Yes     | Asteraceae <sup>j</sup> | E                         | 18              | 2                | P                            | 817                    | 0.8     | 1.7     | 3.3     | 598                        | O                           | <i>Petunia</i> <sup>c</sup>     | FC:PI                |
| 326a                      | <i>Centaurea diffusa</i> Lam.                                           | Yes     | Asteraceae <sup>j</sup> | E                         | 16              | 2                | P                            | 880                    | 0.9     | 1.8     | 3.6     | 529                        | O                           | G <sup>c</sup>                  | CIA                  |
| 327a                      | <i>Centaurea edith-mariae</i> Radic                                     | Yes     | Asteraceae <sup>j</sup> | E                         | 36              | 4                | P                            | 1,775                  | 1.8     | 3.6     | 7.3     | 598                        | O                           | <i>Petunia</i> <sup>c</sup>     | FC:PI                |
| 328a                      | <i>Centaurea elegantissima</i> Radic                                    | Yes     | Asteraceae <sup>j</sup> | E                         | 36              | 4                | P                            | 1,819                  | 1.9     | 3.7     | 7.4     | 598                        | O                           | <i>Petunia</i> <sup>c</sup>     | FC:PI                |
| 329a                      | <i>Centaurea glaberrima</i> Tausch <sup>h</sup>                         | Yes     | Asteraceae <sup>j</sup> | E                         | 36              | 4                | P                            | 1,560                  | 1.6     | 3.2     | 6.4     | 598                        | O                           | <i>Petunia</i> <sup>c</sup>     | FC:PI                |
| 329b                      | <i>Centaurea glaberrima</i> Tausch <sup>h</sup>                         | Yes     | Asteraceae <sup>j</sup> | E                         | 36              | 4                | P                            | 1,643                  | 1.7     | 3.4     | 6.7     | 598                        | O                           | <i>Petunia</i> <sup>c</sup>     | FC:PI                |
| 330a                      | <i>Centaurea gloriosa</i> var. <i>multiflora</i> Radic                  | Yes     | Asteraceae <sup>j</sup> | E                         | 18              | 2                | P                            | 1,061                  | 1.1     | 2.2     | 4.3     | 598                        | O                           | <i>Petunia</i> <sup>c</sup>     | FC:PI                |
| 330b                      | <i>Centaurea gloriosa</i> var. <i>gloriosa</i> Radic                    | Yes     | Asteraceae <sup>j</sup> | E                         | 18              | 2                | P                            | 1,066                  | 1.1     | 2.2     | 4.4     | 598                        | O                           | <i>Petunia</i> <sup>c</sup>     | FC:PI                |
| 331a                      | <i>Centaurea indurata</i> Janka                                         | Yes     | Asteraceae <sup>j</sup> | E                         | 44              | 4                | P                            | 1,868                  | 1.9     | 3.8     | 7.6     | 529                        | O                           | G <sup>c</sup>                  | CIA                  |
| 332a                      | <i>Centaurea jacea</i> L.                                               | Yes     | Asteraceae <sup>j</sup> | E                         | 44              | 4                | P                            | 1,956                  | 2.0     | 4.0     | 8.0     | 529                        | O                           | G <sup>c</sup>                  | CIA                  |
| 333a                      | <i>Centaurea kernerana</i> Janka                                        | Yes     | Asteraceae <sup>j</sup> | E                         | 22              | 2                | P                            | 993                    | 1.0     | 2.0     | 4.1     | 529                        | O                           | G <sup>c</sup>                  | CIA                  |
| 334a                      | <i>Centaurea kusanii</i> Radic                                          | Yes     | Asteraceae <sup>j</sup> | E                         | 36 + 1B         | 4                | P                            | 1,790                  | 1.8     | 3.7     | 7.3     | 598                        | O                           | <i>Petunia</i> <sup>c</sup>     | FC:PI                |
| 335a                      | <i>Centaurea mayeri</i> Radic                                           | Yes     | Asteraceae <sup>j</sup> | E                         | 36              | 4                | P                            | 1,731                  | 1.8     | 3.5     | 7.1     | 598                        | O                           | <i>Petunia</i> <sup>c</sup>     | FC:PI                |
| 336a                      | <i>Centaurea moesiaca</i> Urumov & H. Wagner                            | Yes     | Asteraceae <sup>j</sup> | E                         | 44              | 4                | P                            | 1,992                  | 2.0     | 4.1     | 8.1     | 529                        | O                           | G <sup>c</sup>                  | CIA                  |
| 337a                      | <i>Centaurea nervosa</i> Willd. subsp. <i>nervosa</i>                   | Yes     | Asteraceae <sup>j</sup> | E                         | 22              | 2                | P                            | 1,056                  | 1.1     | 2.2     | 4.3     | 529                        | O                           | G <sup>c</sup>                  | CIA                  |
| 338a                      | <i>Centaurea nervosa</i> (Halascy) Dostal subsp. <i>gheorghieffii</i>   | Yes     | Asteraceae <sup>j</sup> | E                         | 44              | 4                | P                            | 2,034                  | 2.1     | 4.2     | 8.3     | 529                        | O                           | G <sup>c</sup>                  | CIA                  |
| 339a                      | <i>Centaurea nigrescens</i> Willd.                                      | Yes     | Asteraceae <sup>j</sup> | E                         | 44              | 4                | P                            | 1,858                  | 1.9     | 3.8     | 7.6     | 529                        | O                           | G <sup>c</sup>                  | CIA                  |
| 340a                      | <i>Centaurea ovina</i> (DC.) Dostal subsp. <i>besserana</i>             | Yes     | Asteraceae <sup>j</sup> | E                         | 18              | 2                | P                            | 861                    | 0.9     | 1.8     | 3.5     | 529                        | O                           | G <sup>c</sup>                  | CIA                  |
| 341a                      | <i>Centaurea parilica</i> Stoj. & Stefanov                              | Yes     | Asteraceae <sup>j</sup> | E                         | 22              | 2                | P                            | 1,066                  | 1.1     | 2.2     | 4.4     | 529                        | O                           | G <sup>c</sup>                  | CIA                  |
| 342a                      | <i>Centaurea ragusina</i> L. subsp. <i>lungensis</i> (Ginzberger) Hayek | Yes     | Asteraceae <sup>j</sup> | E                         | 20              | 2                | P                            | 1,619                  | 1.7     | 3.3     | 6.6     | 598                        | O                           | <i>Petunia</i> <sup>c</sup>     | FC:PI                |
| 342b                      | <i>Centaurea ragusina</i> L. subsp. <i>ragusina</i>                     | Yes     | Asteraceae <sup>j</sup> | E                         | 20              | 2                | P                            | 1,677                  | 1.7     | 3.4     | 6.9     | 598                        | O                           | <i>Petunia</i> <sup>c</sup>     | FC:PI                |
| 343a                      | <i>Centaurea rupestris</i> L. s.l.                                      | Yes     | Asteraceae <sup>j</sup> | E                         | 20              | 2                | P                            | 1,139                  | 1.2     | 2.3     | 4.7     | 598                        | O                           | <i>Petunia</i> <sup>c</sup>     | FC:PI                |
| 344a                      | <i>Centaurea solstitialis</i> L.                                        | Yes     | Asteraceae <sup>j</sup> | E                         | 16              | 2                | A                            | 851                    | 0.9     | 1.7     | 3.5     | 529                        | O                           | G <sup>c</sup>                  | CIA                  |
| 345a                      | <i>Centaurea stenolepis</i> A. Kerner                                   | Yes     | Asteraceae <sup>j</sup> | E                         | 22              | 2                | P                            | 1,056                  | 1.1     | 2.2     | 4.3     | 529                        | O                           | G <sup>c</sup>                  | CIA                  |
| 346a                      | <i>Centaurea stenolepis</i> A. Kerner                                   | Yes     | Asteraceae <sup>j</sup> | E                         | 44              | 4                | P                            | 2,015                  | 2.1     | 4.1     | 8.2     | 529                        | O                           | G <sup>c</sup>                  | CIA                  |



|      |                                                                                                                                 |                |                           |   |                |                |                |       |     |     |      |     |   |                              |       |
|------|---------------------------------------------------------------------------------------------------------------------------------|----------------|---------------------------|---|----------------|----------------|----------------|-------|-----|-----|------|-----|---|------------------------------|-------|
| 347a | <i>Centaurea stoebe</i> L.                                                                                                      | Yes            | Asteraceae <sup>j</sup>   | E | 18             | 2              | P              | 864   | 0.9 | 1.8 | 3.5  | 529 | O | G <sup>c</sup>               | CIA   |
| 348a | <i>Centaurea stoebe</i> L.                                                                                                      | Yes            | Asteraceae <sup>j</sup>   | E | 36             | 4              | P              | 1,535 | 1.6 | 3.1 | 6.3  | 529 | O | G <sup>c</sup>               | CIA   |
| 349a | <i>Centaurea tuberosa</i> Vis.                                                                                                  | Yes            | Asteraceae <sup>j</sup>   | E | 22             | 2              | P              | 1,315 | 1.3 | 2.7 | 5.4  | 598 | O | <i>Petunia</i> <sup>c</sup>  | FC:PI |
| 350a | <i>Centaurea visiani</i> Radic<br>subsp. <i>pumilla</i>                                                                         | Yes            | Asteraceae <sup>j</sup>   | E | 18             | 2              | P              | 1,051 | 1.1 | 2.2 | 4.3  | 598 | O | <i>Petunia</i> <sup>c</sup>  | FC:PI |
| 350b | <i>Centaurea visiani</i> Radic<br>subsp. <i>visiani</i>                                                                         | Yes            | Asteraceae <sup>j</sup>   | E | 18             | 2              | P              | 1,071 | 1.1 | 2.2 | 4.4  | 598 | O | <i>Petunia</i> <sup>c</sup>  | FC:PI |
| 350c | <i>Centaurea visiani</i> Radic<br><i>s.l.</i>                                                                                   | Yes            | Asteraceae <sup>j</sup>   | E | 18             | 2              | P              | 1,051 | 1.1 | 2.2 | 4.3  | 598 | O | <i>Petunia</i> <sup>c</sup>  | FC:PI |
| 351a | <i>Ceropogia dichotoma</i><br>Haw.                                                                                              | – <sup>m</sup> | Apocynaceae               | E | 22°            | 2              | P              | 435   | 0.4 | 0.9 | 1.8  | 477 | O | <i>Raphanus</i> <sup>c</sup> | FC:PI |
| 352a | <i>Ceropogia fusca</i> Bolle                                                                                                    | – <sup>m</sup> | Apocynaceae               | E | 22°            | 2              | P              | 421   | 0.4 | 0.9 | 1.7  | 477 | O | <i>Raphanus</i> <sup>c</sup> | FC:PI |
| 353a | <i>Chamaecytisus proliferus</i><br>(L. f.) Link subsp.<br><i>proliferus</i>                                                     | – <sup>m</sup> | Fabaceae <sup>j</sup>     | E | 48°            | 4              | P              | 1,218 | 1.2 | 2.5 | 5.0  | 552 | O | <i>Solan.</i> <sup>c</sup>   | FC:PI |
| 354a | <i>Chardinia orientalis</i> (L.)<br>Kuntze                                                                                      | Yes            | Asteraceae <sup>j</sup>   | E | 22             | 2              | A              | 1,834 | 1.9 | 3.8 | 7.5  | 502 | O | G <sup>c</sup>               | FC:PI |
| 355a | <i>Cheiranthus cheiri</i> L.                                                                                                    | Yes            | Brassicaceae <sup>j</sup> | E | 14             | 2              | – <sup>q</sup> | 254   | 0.3 | 0.5 | 1.0  | 599 | O | L                            | FC:PI |
| 356a | <i>Cheirolophus canariensis</i><br>(Brouss. ex Willd.)<br>Holub. var.<br><i>subexpinnatus</i><br>(Burchard) Hansen &<br>Sunding | – <sup>m</sup> | Asteraceae <sup>j</sup>   | E | 30°            | >2             | P              | 675   | 0.7 | 1.4 | 2.8  | 552 | O | <i>Solan.</i> <sup>c</sup>   | FC:PI |
| 357a | <i>Cheirolophus teydis</i> (Chr.<br>Sm. in Buch) G.Lopez                                                                        | – <sup>m</sup> | Asteraceae <sup>j</sup>   | E | ~30            | ≥ 2            | P              | 699   | 0.7 | 1.4 | 2.9  | 477 | O | <i>Solan.</i> <sup>c</sup>   | FC:PI |
| 358a | <i>Chenopodium coronopus</i><br>Moq. in DC.                                                                                     | – <sup>m</sup> | Amaranthaceae             | E | 18             | 2              | A              | 469   | 0.5 | 1.0 | 1.9  | 552 | O | <i>Solan.</i> <sup>c</sup>   | FC:PI |
| 359a | <i>Chenopodium desertorum</i><br>J.M.Black                                                                                      | – <sup>m</sup> | Amaranthaceae             | E | – <sup>n</sup> | – <sup>p</sup> | P              | 1,076 | 1.1 | 2.2 | 4.4  | 526 | O | A                            | FC:PI |
| 360a | <i>Chionochloa antarctica</i><br>(Hook.f.) Zotov                                                                                | Yes            | Poaceae <sup>j</sup>      | M | 42             | 6              | P              | 2,597 | 2.7 | 5.3 | 10.6 | 528 | O | – <sup>w</sup>               | FC:PI |
| 361a | <i>Chionochloa australis</i><br>(Buchanan) Zotov                                                                                | Yes            | Poaceae <sup>j</sup>      | M | 42             | 6              | P              | 2,166 | 2.2 | 4.4 | 8.9  | 528 | O | – <sup>w</sup>               | FC:PI |
| 362a | <i>Chionochloa bromoides</i><br>(Hook.f.) Zotov                                                                                 | Yes            | Poaceae <sup>j</sup>      | M | 42             | 6              | P              | 2,978 | 3.0 | 6.1 | 12.2 | 528 | O | – <sup>w</sup>               | FC:PI |
| 363a | <i>Chionochloa cheesemani</i><br>(Hack.) Zotov                                                                                  | Yes            | Poaceae <sup>j</sup>      | M | 42             | 6              | P              | 2,675 | 2.7 | 5.5 | 10.9 | 528 | O | – <sup>w</sup>               | FC:PI |
| 364a | <i>Chionochloa conspicua</i><br>(Hook.f.) Zotov subsp.<br><i>cunninghamii</i>                                                   | – <sup>m</sup> | Poaceae <sup>j</sup>      | M | 42             | 6              | P              | 3,095 | 3.2 | 6.3 | 12.7 | 528 | O | – <sup>w</sup>               | FC:PI |
| 365a | <i>Chionochloa crassiuscula</i><br>(Kirk) Zotov subsp.<br><i>crassiuscula</i>                                                   | Yes            | Poaceae <sup>j</sup>      | M | 42             | 6              | P              | 2,445 | 2.5 | 5.0 | 10.0 | 528 | O | – <sup>w</sup>               | FC:PI |
| 366a | <i>Chionochloa flavescens</i><br>Connor subsp. <i>brevis</i>                                                                    | Yes            | Poaceae <sup>j</sup>      | M | 42             | 6              | P              | 2,528 | 2.6 | 5.2 | 10.3 | 528 | O | – <sup>w</sup>               | FC:PI |
| 366b | <i>Chionochloa flavescens</i><br>Connor subsp. <i>lupeola</i>                                                                   | Yes            | Poaceae <sup>j</sup>      | M | 42             | 6              | P              | 2,601 | 2.7 | 5.3 | 10.6 | 528 | O | – <sup>w</sup>               | FC:PI |
| 367a | <i>Chionochloa flavicans</i><br>Zotov f. <i>flavicans</i>                                                                       | Yes            | Poaceae <sup>j</sup>      | M | 42             | 6              | P              | 3,702 | 3.8 | 7.6 | 15.1 | 528 | O | – <sup>w</sup>               | FC:PI |
| 367b | <i>Chionochloa flavicans</i><br>Zotov f. <i>tenata</i>                                                                          | Yes            | Poaceae <sup>j</sup>      | M | 42             | 6              | P              | 3,800 | 3.9 | 7.8 | 15.5 | 528 | O | – <sup>w</sup>               | FC:PI |
| 368a | <i>Chionochloa juncea</i><br>Zotov                                                                                              | Yes            | Poaceae <sup>j</sup>      | M | 42             | 6              | P              | 2,631 | 2.7 | 5.4 | 10.8 | 528 | O | – <sup>w</sup>               | FC:PI |
| 369a | <i>Chionochloa lanca</i><br>Connor                                                                                              | Yes            | Poaceae <sup>j</sup>      | M | 42             | 6              | P              | 2,474 | 2.5 | 5.1 | 10.1 | 528 | O | – <sup>w</sup>               | FC:PI |

Continued

| Entry number <sup>g</sup> | Species                                                                | Voucher | Family                    | Higher group <sup>#</sup> | 2n <sup>‡</sup> | Ploidy level (x) | Life cycle type <sup>§</sup> | DNA amount             |                |         |         | Original ref. <sup>a</sup> | Present amount <sup>†</sup> | Standard species <sup>*b1</sup> | Method <sup>††</sup> |
|---------------------------|------------------------------------------------------------------------|---------|---------------------------|---------------------------|-----------------|------------------|------------------------------|------------------------|----------------|---------|---------|----------------------------|-----------------------------|---------------------------------|----------------------|
|                           |                                                                        |         |                           |                           |                 |                  |                              | 1C (Mbp <sup>s</sup> ) | 1C (pg)        | 2C (pg) | 4C (pg) |                            |                             |                                 |                      |
| 370a                      | <i>Chionochloa macra</i> Zotov                                         | Yes     | Poaceae <sup>i</sup>      | M                         | 42              | 6                | P                            | 2,450                  | 2.5            | 5.0     | 10.0    | 528                        | O                           | – <sup>w</sup>                  | FC:PI                |
| 371a                      | <i>Chionochloa pallens</i> Zotov subsp. <i>pallens</i>                 | Yes     | Poaceae <sup>i</sup>      | M                         | 42              | 6                | P                            | 2,509                  | 2.6            | 5.1     | 10.3    | 528                        | O                           | – <sup>w</sup>                  | FC:PI                |
| 372a                      | <i>Chionochloa rigida</i> (Raoul) Zotov subsp. <i>rigida</i>           | Yes     | Poaceae <sup>i</sup>      | M                         | 42              | 6                | P                            | 2,479                  | 2.5            | 5.1     | 10.1    | 528                        | O                           | – <sup>w</sup>                  | FC:PI                |
| 373a                      | <i>Chionochloa rubra</i> Zotov subsp. <i>rubra</i> var. <i>rubra</i>   | Yes     | Poaceae <sup>i</sup>      | M                         | 42              | 6                | P                            | 2,513                  | 2.6            | 5.1     | 10.3    | 528                        | O                           | – <sup>w</sup>                  | FC:PI                |
| 373b                      | <i>Chionochloa rubra</i> Zotov subsp. <i>rubra</i> var. <i>inermis</i> | Yes     | Poaceae <sup>i</sup>      | M                         | 42              | 6                | P                            | 2,621                  | 2.7            | 5.4     | 10.7    | 528                        | O                           | – <sup>w</sup>                  | FC:PI                |
| 374a                      | <i>Chionochloa spiralis</i> Zotov                                      | Yes     | Poaceae <sup>i</sup>      | M                         | 42              | 6                | P                            | 2,499                  | 2.6            | 5.1     | 10.2    | 528                        | O                           | – <sup>w</sup>                  | FC:PI                |
| 375a                      | <i>Chionochloa vireta</i> Connor                                       | Yes     | Poaceae <sup>i</sup>      | M                         | 42              | 6                | P                            | 2,430                  | 2.5            | 5.0     | 9.9     | 528                        | O                           | – <sup>w</sup>                  | FC:PI                |
| 376a                      | <i>Chorisporea tenella</i> (Pall.) DC.                                 | Yes     | Brassicaceae <sup>j</sup> | E                         | 14              | 2                | – <sup>q</sup>               | 342                    | 0.4            | 0.7     | 1.4     | 599                        | O                           | L                               | FC:PI                |
| 377a                      | <i>Christolea crassifolia</i> Cambess.                                 | Yes     | Brassicaceae <sup>j</sup> | E                         | 14              | 2                | – <sup>q</sup>               | 1,379                  | 1.4            | 2.8     | 5.6     | 599                        | O                           | L                               | FC:PI                |
| 378b                      | <i>Chrysanthemum multicolor</i> Hyl.                                   | Yes     | Asteraceae <sup>j</sup>   | E                         | – <sup>n</sup>  | – <sup>p</sup>   | A                            | 15,917                 | 16.3           | 32.6    | 65.1    | 492                        | O                           | C <sup>c</sup>                  | FC:PI                |
| 379a                      | <i>Chrysochamela velutina</i> (DC.) Boiss.                             | Yes     | Brassicaceae <sup>j</sup> | E                         | 22 <sup>o</sup> | – <sup>p</sup>   | – <sup>q</sup>               | 342                    | 0.4            | 0.7     | 1.4     | 599                        | O                           | L                               | FC:PI                |
| 380a                      | <i>Cirsium acaule</i> (L.) Scop.                                       | Yes     | Asteraceae <sup>j</sup>   | E                         | 34 <sup>o</sup> | 2                | P                            | 1,281                  | 1.3            | 2.6     | 5.2     | 472 <sup>ab</sup>          | O                           | <i>Solan.</i> <sup>e</sup>      | FC:PI                |
| 381a                      | <i>Cirsium arvense</i> (L.) Scop.                                      | Yes     | Asteraceae <sup>j</sup>   | E                         | 34 <sup>o</sup> | 2                | P                            | 1,389                  | 1.4            | 2.8     | 5.7     | 472 <sup>ab</sup>          | O                           | <i>Solan.</i> <sup>e</sup>      | FC:PI                |
| 382a                      | <i>Cirsium brachycephalum</i> Juratzka                                 | Yes     | Asteraceae <sup>j</sup>   | E                         | 34              | 2                | B                            | 1,457                  | 1.5            | 3.0     | 6.0     | 472 <sup>ab</sup>          | O                           | <i>Solan.</i> <sup>e</sup>      | FC:PI                |
| 383a                      | <i>Cirsium canum</i> (L.) All.                                         | Yes     | Asteraceae <sup>j</sup>   | E                         | 34 <sup>o</sup> | 2                | P                            | 1,095                  | 1.1            | 2.2     | 4.5     | 472 <sup>ab</sup>          | O                           | <i>Solan.</i> <sup>e</sup>      | FC:PI                |
| 384a                      | <i>Cirsium eriophorum</i> (L.) Scop.                                   | Yes     | Asteraceae <sup>j</sup>   | E                         | 34 <sup>o</sup> | 2                | B                            | 1,760                  | 1.8            | 3.6     | 7.2     | 472 <sup>ab</sup>          | O                           | <i>Solan.</i> <sup>e</sup>      | FC:PI                |
| 385a                      | <i>Cirsium erisithales</i> (Jacq.) Scop.                               | Yes     | Asteraceae <sup>j</sup>   | E                         | 34 <sup>o</sup> | 2                | P                            | 1,139                  | 1.2            | 2.3     | 4.7     | 472 <sup>ab</sup>          | O                           | <i>Solan.</i> <sup>e</sup>      | FC:PI                |
| 386a                      | <i>Cirsium heterophyllum</i> (L.) Hill                                 | Yes     | Asteraceae <sup>j</sup>   | E                         | 34 <sup>o</sup> | 2                | P                            | 1,046                  | 1.1            | 2.1     | 4.3     | 472 <sup>ab</sup>          | O                           | <i>Solan.</i> <sup>e</sup>      | FC:PI                |
| 387a                      | <i>Cirsium oleraceum</i> (L.) Scop.                                    | Yes     | Asteraceae <sup>j</sup>   | E                         | 34 <sup>o</sup> | 2                | P                            | 1,134                  | 1.2            | 2.3     | 4.6     | 472 <sup>ab</sup>          | O                           | <i>Solan.</i> <sup>e</sup>      | FC:PI                |
| 388a                      | <i>Cirsium palustre</i> (L.) Scop.                                     | Yes     | Asteraceae <sup>j</sup>   | E                         | 34 <sup>o</sup> | 2                | B                            | 1,262                  | 1.3            | 2.6     | 5.2     | 472 <sup>ab</sup>          | O                           | <i>Solan.</i> <sup>e</sup>      | FC:PI                |
| 389a                      | <i>Cirsium pannonicum</i> Link                                         | Yes     | Asteraceae <sup>j</sup>   | E                         | 34 <sup>o</sup> | 2                | P                            | 1,193                  | 1.2            | 2.4     | 4.9     | 472 <sup>ab</sup>          | O                           | <i>Solan.</i> <sup>e</sup>      | FC:PI                |
| 390a                      | <i>Cirsium rivulare</i> (Jacq.) All.                                   | Yes     | Asteraceae <sup>j</sup>   | E                         | 34 <sup>o</sup> | 2                | P                            | 1,174                  | 1.2            | 2.4     | 4.8     | 472 <sup>ab</sup>          | O                           | <i>Solan.</i> <sup>e</sup>      | FC:PI                |
| 391a                      | <i>Cirsium rivulare</i> (Jacq.) All.                                   | Yes     | Asteraceae <sup>j</sup>   | E                         | c. 51           | 3                | P                            | – <sup>t</sup>         | – <sup>t</sup> | 3.4     | 6.9     | 472 <sup>ab</sup>          | O                           | <i>Solan.</i> <sup>e</sup>      | FC:PI                |
| 392a                      | <i>Cirsium spinosissimum</i> (L.) Scop.                                | Yes     | Asteraceae <sup>j</sup>   | E                         | 34 <sup>o</sup> | 2                | P                            | 1,237                  | 1.3            | 2.5     | 5.1     | 472 <sup>ab</sup>          | O                           | <i>Solan.</i> <sup>e</sup>      | FC:DAPI              |

|      |                                                                               |                |                           |   |                       |                |                |       |     |      |      |                   |   |                              |       |
|------|-------------------------------------------------------------------------------|----------------|---------------------------|---|-----------------------|----------------|----------------|-------|-----|------|------|-------------------|---|------------------------------|-------|
| 393a | <i>Cirsium vulgare</i> (Savi) Ten.                                            | Yes            | Asteraceae <sup>j</sup>   | E | 68 <sup>o</sup>       | 4              | B              | 2,709 | 2.8 | 5.5  | 11.1 | 472 <sup>ab</sup> | O | <i>Solan.</i> <sup>e</sup>   | FC:PI |
| 394a | <i>Cistanche phelypaea</i> (L.) Coutinho subsp. <i>phelypaea</i> <sup>i</sup> | Yes            | Orobanchaceae             | E | 40                    | 2              | P              | 8,729 | 8.9 | 17.9 | 35.7 | 531               | O | G <sup>c</sup>               | CIA   |
| 394b | <i>Cistanche phelypaea</i> (L.) Coutinho subsp. <i>lutea</i> <sup>i</sup>     | Yes            | Orobanchaceae             | E | 40                    | 2              | AP             | 9,716 | 9.9 | 19.9 | 39.7 | 531               | O | G <sup>c</sup>               | CIA   |
| 395a | <i>Cistus ladaniferus</i> L.                                                  | Yes            | Cistaceae                 | E | – <sup>n</sup>        | – <sup>P</sup> | P              | 856   | 0.9 | 1.8  | 3.5  | 489               | O | – <sup>w</sup>               | FC:EB |
| 396c | <i>Citrus aurantium</i> L.                                                    | Yes            | Rutaceae                  | E | – <sup>n</sup>        | – <sup>P</sup> | P              | 435   | 0.4 | 0.9  | 1.8  | 489               | O | – <sup>w</sup>               | FC:EB |
| 397c | <i>Citrus limon</i> (L.) Burm. f.                                             | Yes            | Rutaceae                  | E | – <sup>n</sup>        | – <sup>P</sup> | P              | 435   | 0.4 | 0.9  | 1.8  | 489               | O | – <sup>w</sup>               | FC:EB |
| 397d | <i>Citrus limon</i> (L.) Burm.f.                                              | No             | Rutaceae                  | E | – <sup>n</sup>        | – <sup>P</sup> | P              | 411   | 0.4 | 0.8  | 1.7  | 563               | O | <i>Solan.</i> <sup>e</sup>   | FC:PI |
| 398h | <i>Citrus sinensis</i> <sup>i</sup>                                           | No             | Rutaceae                  | E | – <sup>n</sup>        | – <sup>P</sup> | P              | 425   | 0.4 | 0.9  | 1.7  | 563               | O | <i>Solan.</i> <sup>e</sup>   | FC:PI |
| 399a | <i>Cleome hassleriana</i> Chodat                                              | – <sup>m</sup> | Cleomaceae                | E | 20                    | – <sup>P</sup> | – <sup>q</sup> | 300   | 0.3 | 0.6  | 1.2  | 509               | O | – <sup>w</sup>               | FC:PI |
| 400a | <i>Coccoloba uvifera</i> (L.) L.                                              | No             | Polygonaceae              | E | – <sup>n</sup>        | – <sup>P</sup> | P              | 1,890 | 1.9 | 3.9  | 7.7  | 501 <sup>ag</sup> | O | B <sup>c</sup>               | Fe    |
| 401a | <i>Cochlearia aucheri</i> Boiss.                                              | Yes            | Brassicaceae <sup>j</sup> | E | – <sup>n</sup>        | – <sup>P</sup> | B              | 293   | 0.3 | 0.6  | 1.2  | 522               | O | <i>Raphanus</i> <sup>e</sup> | FC:PI |
| 402a | <i>Cochlearia borzaeana</i> (Coman & Nyár.) Pobed. <sup>i</sup>               | Yes            | Brassicaceae <sup>j</sup> | E | 48                    | 8              | P              | 1,382 | 1.4 | 2.8  | 5.7  | 546               | O | <i>Solan.</i> <sup>e</sup>   | FC:PI |
| 403a | <i>Cochlearia danica</i> L.                                                   | Yes            | Brassicaceae <sup>j</sup> | E | (33), 42 <sup>o</sup> | – <sup>P</sup> | – <sup>q</sup> | 685   | 0.7 | 1.4  | 2.8  | 599               | O | L                            | FC:PI |
| 404a | <i>Cochlearia officinalis</i> L.                                              | Yes            | Brassicaceae <sup>j</sup> | E | 32                    | 4              | – <sup>q</sup> | 734   | 0.8 | 1.5  | 3.0  | 599               | O | L                            | FC:PI |
| 405b | <i>Cochlearia pyrenaica</i> DC. <sup>i, aq</sup>                              | Yes            | Brassicaceae <sup>j</sup> | E | 12                    | 2              | P              | 383   | 0.4 | 0.8  | 1.6  | 546 <sup>aq</sup> | O | <i>Raphanus</i> <sup>e</sup> | FC:PI |
| 405c | <i>Cochlearia pyrenaica</i> s.l. <sup>aq</sup>                                | Yes            | Brassicaceae <sup>j</sup> | E | 12                    | 2              | P              | 445   | 0.5 | 0.9  | 1.8  | 546 <sup>aq</sup> | O | <i>Solan.</i> <sup>e</sup>   | FC:PI |
| 406a | <i>Cochlearia sempervivum</i> Boiss. & Bal.                                   | Yes            | Brassicaceae <sup>j</sup> | E | – <sup>n</sup>        | – <sup>P</sup> | A              | 318   | 0.3 | 0.7  | 1.3  | 522               | O | <i>Raphanus</i> <sup>e</sup> | FC:PI |
| 407a | <i>Cochlearia tatrae</i> Borbás                                               | Yes            | Brassicaceae <sup>j</sup> | E | 42                    | 6              | P              | 1,022 | 1.0 | 2.1  | 4.2  | 546               | O | <i>Cirsium</i> <sup>e</sup>  | FC:PI |
| 408d | <i>Cocos nucifera</i> L. cv. Malayan Yellow Dwarf                             | No             | Arecaceae <sup>j</sup>    | M | 32                    | 2              | P              | 2,738 | 2.8 | 5.6  | 11.2 | 547               | O | <i>Petunia</i> <sup>e</sup>  | FC:PI |
| 409a | <i>Coffea anthonyi</i> Stoff. & F.Anthony                                     | Yes            | Rubiaceae                 | E | 22                    | 2              | P              | 706   | 0.7 | 1.4  | 2.9  | 560 <sup>ar</sup> | O | <i>Petunia</i> <sup>e</sup>  | FC:PI |
| 410j | <i>Coffea arabica</i> L.                                                      | No             | Rubiaceae                 | E | 44 <sup>o</sup>       | 4              | P              | 1,120 | 1.1 | 2.3  | 4.6  | 501 <sup>ag</sup> | O | B <sup>c</sup>               | Fe    |
| 411d | <i>Coffea brevipes</i> Hiern                                                  | Yes            | Rubiaceae                 | E | 22                    | 2              | P              | 745   | 0.8 | 1.5  | 3.0  | 560               | O | <i>Petunia</i> <sup>e</sup>  | FC:PI |
| 412e | <i>Coffea canephora</i> Pierre ex A.Froehner                                  | Yes            | Rubiaceae                 | E | 22                    | 2              | P              | 704   | 0.7 | 1.4  | 2.9  | 560               | O | <i>Petunia</i> <sup>e</sup>  | FC:PI |
| 413d | <i>Coffea congensis</i> Froehn.                                               | Yes            | Rubiaceae                 | E | 22                    | 2              | P              | 723   | 0.7 | 1.5  | 3.0  | 560               | O | <i>Petunia</i> <sup>e</sup>  | FC:PI |
| 414a | <i>Coffea costatifructa</i> Bridson                                           | Yes            | Rubiaceae                 | E | 22                    | 2              | P              | 562   | 0.6 | 1.2  | 2.3  | 560               | O | <i>Petunia</i> <sup>e</sup>  | FC:PI |
| 415e | <i>Coffea eugenioides</i> S.Moore                                             | Yes            | Rubiaceae                 | E | 22                    | 2              | P              | 667   | 0.7 | 1.4  | 2.7  | 560               | O | <i>Petunia</i> <sup>e</sup>  | FC:PI |
| 416a | <i>Coffea heterocalyx</i> Stoff.                                              | Yes            | Rubiaceae                 | E | 22                    | 2              | P              | 849   | 0.9 | 1.7  | 3.5  | 560               | O | <i>Petunia</i> <sup>e</sup>  | FC:PI |
| 417d | <i>Coffea humilis</i> A.Chev.                                                 | Yes            | Rubiaceae                 | E | 22                    | 2              | P              | 863   | 0.9 | 1.8  | 3.5  | 560               | O | <i>Petunia</i> <sup>e</sup>  | FC:PI |
| 418a | <i>Coffea kapakata</i> (A.Chev.) Bridson                                      | Yes            | Rubiaceae                 | E | 22                    | 2              | P              | 647   | 0.7 | 1.3  | 2.6  | 560               | O | <i>Petunia</i> <sup>e</sup>  | FC:PI |
| 419f | <i>Coffea liberica</i> Hiern                                                  | Yes            | Rubiaceae                 | E | 22                    | 2              | P              | 739   | 0.8 | 1.5  | 3.0  | 560               | O | <i>Petunia</i> <sup>e</sup>  | FC:PI |
| 419g | <i>Coffea liberica</i> Hiern subsp. <i>dewevrei</i>                           | Yes            | Rubiaceae                 | E | 22                    | 2              | P              | 688   | 0.7 | 1.4  | 2.8  | 560               | O | <i>Petunia</i> <sup>e</sup>  | FC:PI |
| 420a | <i>Coffea pocsii</i> Bridson                                                  | Yes            | Rubiaceae                 | E | 22                    | 2              | P              | 530   | 0.5 | 1.1  | 2.2  | 560               | O | <i>Petunia</i> <sup>e</sup>  | FC:PI |
| 421e | <i>Coffea pseudozanguebariae</i> D.M.Bridson                                  | Yes            | Rubiaceae                 | E | 22                    | 2              | P              | 553   | 0.6 | 1.1  | 2.3  | 560               | O | <i>Petunia</i> <sup>e</sup>  | FC:PI |
| 422d | <i>Coffea racemosa</i> <sup>i</sup>                                           | Yes            | Rubiaceae                 | E | 22                    | 2              | P              | 506   | 0.5 | 1.0  | 2.1  | 560               | O | <i>Petunia</i> <sup>e</sup>  | FC:PI |
| 423b | <i>Coffea salvatrix</i> Swynn. & Philipson                                    | Yes            | Rubiaceae                 | E | 22                    | 2              | P              | 597   | 0.6 | 1.2  | 2.4  | 560               | O | <i>Petunia</i> <sup>e</sup>  | FC:PI |

Continued

| Entry number <sup>e</sup> | Species                                                           | Voucher | Family                    | Higher group <sup>#</sup> | 2n <sup>‡</sup> | Ploidy level (x) | Life cycle type <sup>§</sup> | DNA amount             |         |         |         | Original ref. <sup>a</sup> | Present amount <sup>†</sup> | Standard species <sup>*b1</sup> | Method <sup>††</sup> |
|---------------------------|-------------------------------------------------------------------|---------|---------------------------|---------------------------|-----------------|------------------|------------------------------|------------------------|---------|---------|---------|----------------------------|-----------------------------|---------------------------------|----------------------|
|                           |                                                                   |         |                           |                           |                 |                  |                              | 1C (Mbp <sup>b</sup> ) | 1C (pg) | 2C (pg) | 4C (pg) |                            |                             |                                 |                      |
| 424d                      | <i>Coffea sessiliflora</i> Bridson                                | Yes     | Rubiaceae                 | E                         | 22              | 2                | P                            | 542                    | 0.6     | 1.1     | 2.2     | 560                        | O                           | <i>Petunia</i> <sup>c</sup>     | FC:PI                |
| 425d                      | <i>Coffea stenophylla</i> G.Don                                   | Yes     | Rubiaceae                 | E                         | 22              | 2                | P                            | 629                    | 0.6     | 1.3     | 2.6     | 560                        | O                           | <i>Petunia</i> <sup>c</sup>     | FC:PI                |
| 426a                      | <i>Colchicum alpinum</i> DC. <sup>i</sup>                         | No      | Colchicaceae              | M                         | 56              | 6                | P                            | 3,941                  | 4.0     | 8.1     | 16.1    | 468                        | O                           | <i>Petunia</i> <sup>c</sup>     | FC:EB                |
| 427b                      | <i>Colchicum autumnale</i> L. <sup>i</sup>                        | No      | Colchicaceae              | M                         | 36              | 4                | P                            | 2,880                  | 2.9     | 5.9     | 11.8    | 468                        | O                           | G <sup>c</sup>                  | FC:EB                |
| 428a                      | <i>Colchicum corsicum</i> Baker <sup>i</sup>                      | No      | Colchicaceae              | M                         | c. 200          | c. 22            | P                            | 10,416                 | 10.7    | 21.3    | 42.6    | 468                        | O                           | G <sup>c</sup>                  | FC:EB                |
| 429a                      | <i>Colchicum lusitanum</i> Brot. <sup>i</sup>                     | No      | Colchicaceae              | M                         | c. 96           | c. 10            | P                            | 5,232                  | 5.4     | 10.7    | 21.4    | 468                        | O                           | G <sup>c</sup>                  | FC:EB                |
| 430a                      | <i>Colchicum multiflorum</i> Brot. <sup>i</sup>                   | No      | Colchicaceae              | M                         | c. 144          | 16               | P                            | 8,069                  | 8.3     | 16.5    | 33.0    | 468                        | O                           | G <sup>c</sup>                  | FC:EB                |
| 431a                      | <i>Colpodium versicolor</i> (Stev.) Schmalh.                      | Yes     | Poaceae <sup>j</sup>      | M                         | 4               | 2                | P                            | 1,174                  | 1.2     | 2.4     | 4.8     | 574                        | O                           | G <sup>d</sup>                  | FC:PI                |
| 432a                      | <i>Colubrina asiatica</i> (L.) Brogn.                             | No      | Rhamnaceae                | E                         | – <sup>n</sup>  | – <sup>p</sup>   | P                            | 907                    | 0.9     | 1.9     | 3.7     | 501 <sup>ag</sup>          | O                           | B <sup>c</sup>                  | Fe                   |
| 433a                      | <i>Colymbada apiculata</i> (Ledeb.) Holub                         | Yes     | Asteraceae <sup>j</sup>   | E                         | 20              | 2                | P                            | 1,731                  | 1.8     | 3.5     | 7.1     | 529                        | O                           | G <sup>c</sup>                  | CIA                  |
| 434a                      | <i>Colymbada badensis</i> (Tratt.) Holub                          | Yes     | Asteraceae <sup>j</sup>   | E                         | 20              | 2                | P                            | 1,692                  | 1.7     | 3.5     | 6.9     | 529                        | O                           | G <sup>c</sup>                  | CIA                  |
| 435a                      | <i>Colymbada chrysolepis</i> (Vis.) Holub                         | Yes     | Asteraceae <sup>j</sup>   | E                         | 20              | 2                | P                            | 1,663                  | 1.7     | 3.4     | 6.8     | 529                        | O                           | G <sup>c</sup>                  | CIA                  |
| 436a                      | <i>Colymbada immanuelis-loewii</i> (Degen) Holub                  | Yes     | Asteraceae <sup>j</sup>   | E                         | 20              | 2                | P                            | 1,614                  | 1.7     | 3.3     | 6.6     | 529                        | O                           | G <sup>c</sup>                  | CIA                  |
| 437a                      | <i>Colymbada kotschyana</i> (Heuffel ex Koch) Holub               | Yes     | Asteraceae <sup>j</sup>   | E                         | 20              | 2                | P                            | 1,702                  | 1.7     | 3.5     | 7.0     | 529                        | O                           | G <sup>c</sup>                  | CIA                  |
| 438a                      | <i>Colymbada mannagettae</i> Podp.                                | Yes     | Asteraceae <sup>j</sup>   | E                         | 20              | 2                | P                            | 1,623                  | 1.7     | 3.3     | 6.6     | 529                        | O                           | G <sup>c</sup>                  | CIA                  |
| 439a                      | <i>Colymbada orientalis</i> (L.) Holub                            | Yes     | Asteraceae <sup>j</sup>   | E                         | 20              | 2                | P                            | 1,614                  | 1.7     | 3.3     | 6.6     | 529                        | O                           | G <sup>c</sup>                  | CIA                  |
| 440a                      | <i>Colymbada orientalis</i> (L.) Holub                            | Yes     | Asteraceae <sup>j</sup>   | E                         | 40              | 4                | P                            | 3,384                  | 3.5     | 6.9     | 13.8    | 529                        | O                           | G <sup>c</sup>                  | CIA                  |
| 441a                      | <i>Colymbada salonitana</i> (Vis.) Holub. var. <i>macracantha</i> | Yes     | Asteraceae <sup>j</sup>   | E                         | 20              | 2                | P                            | 1,800                  | 1.8     | 3.7     | 7.4     | 529                        | O                           | G <sup>c</sup>                  | CIA                  |
| 441b                      | <i>Colymbada salonitana</i> (Vis.) Holub. var. <i>salonitana</i>  | Yes     | Asteraceae <sup>j</sup>   | E                         | 20              | 2                | P                            | 1,888                  | 1.9     | 3.9     | 7.7     | 529                        | O                           | G <sup>c</sup>                  | CIA                  |
| 442a                      | <i>Colymbada scabiosa</i> (L.) Holub                              | Yes     | Asteraceae <sup>j</sup>   | E                         | 20              | 2                | P                            | 1,731                  | 1.8     | 3.5     | 7.1     | 529                        | O                           | G <sup>c</sup>                  | CIA                  |
| 443a                      | <i>Colymbada stereophylla</i> (Besser) Holub                      | Yes     | Asteraceae <sup>j</sup>   | E                         | 20              | 2                | P                            | 1,643                  | 1.7     | 3.4     | 6.7     | 529                        | O                           | G <sup>c</sup>                  | CIA                  |
| 444a                      | <i>Conostylis candicans</i> Endl.                                 | No      | Haemodoraceae             | M                         | 16 <sup>o</sup> | – <sup>p</sup>   | P                            | 1,276                  | 1.3     | 2.6     | 5.2     | 612                        | O                           | <i>Solan.</i> <sup>c</sup>      | FC:PI                |
| 445a                      | <i>Conringia planisiliqua</i> Fisch. & C.A.Mey.                   | Yes     | Brassicaceae <sup>j</sup> | E                         | 16              | 2 <sup>p</sup>   | – <sup>q</sup>               | 225                    | 0.2     | 0.5     | 0.9     | 599                        | O                           | L                               | FC:PI                |
| 446a                      | <i>Consoulea corallicola</i> Small (male)                         | Yes     | Cactaceae                 | E                         | 66              | 6                | P                            | 2,523                  | 2.6     | 5.2     | 10.3    | 557                        | O                           | G <sup>c</sup>                  | FC:PI                |

|      |                                                                         |                |                           |   |                     |                |   |       |     |     |      |     |   |                               |       |
|------|-------------------------------------------------------------------------|----------------|---------------------------|---|---------------------|----------------|---|-------|-----|-----|------|-----|---|-------------------------------|-------|
| 447a | <i>Consolea falcata</i> (Ekman & Werderm.) F.M. Knuth                   | Yes            | Cactaceae                 | E | 88                  | 8              | P | 3,756 | 3.8 | 7.7 | 15.4 | 557 | O | G <sup>c</sup>                | FC:PI |
| 448a | <i>Consolea macracantha</i> A.Berger                                    | Yes            | Cactaceae                 | E | 66                  | 6              | P | 2,386 | 2.4 | 4.9 | 9.8  | 557 | O | G <sup>c</sup>                | FC:PI |
| 449a | <i>Consolea millspaughii</i> (Britton) A.Berger (male)                  | Yes            | Cactaceae                 | E | 66                  | 6              | P | 2,406 | 2.5 | 4.9 | 9.8  | 557 | O | G <sup>c</sup>                | FC:PI |
| 450a | <i>Consolea millspaughii</i> (Linn.) A.Berger subsp. <i>caymanensis</i> | Yes            | Cactaceae                 | E | – <sup>n</sup>      | 8              | P | 3,751 | 3.8 | 7.7 | 15.3 | 557 | O | G <sup>c</sup>                | FC:PI |
| 451a | <i>Consolea moniliformis</i> A.Berger (male)                            | Yes            | Cactaceae                 | E | 66                  | 6              | P | 2,479 | 2.5 | 5.1 | 10.1 | 557 | O | G <sup>c</sup>                | FC:PI |
| 452a | <i>Consolea nashii</i> A.Berger                                         | Yes            | Cactaceae                 | E | 66                  | 6              | P | 2,489 | 2.5 | 5.1 | 10.2 | 557 | O | G <sup>c</sup>                | FC:PI |
| 453a | <i>Consolea picardea</i> (Urb.) Areces (male)                           | Yes            | Cactaceae                 | E | 66                  | 6              | P | 2,406 | 2.5 | 4.9 | 9.8  | 557 | O | G <sup>c</sup>                | FC:PI |
| 454a | <i>Consolea rubescens</i> (Salm-Dyck ex A.P. de Candolle) Lem. (male)   | Yes            | Cactaceae                 | E | 88                  | 8              | P | 3,765 | 3.9 | 7.7 | 15.4 | 557 | O | <i>Solan.</i> <sup>c</sup>    | FC:PI |
| 454b | <i>Consolea rubescens</i> (Salm-Dyck ex A.P. de Candolle) Lem. (female) | Yes            | Cactaceae                 | E | 88                  | 8              | P | 3,878 | 4.0 | 7.9 | 15.9 | 557 | O | <i>Solan.</i> <sup>c</sup>    | FC:PI |
| 455a | <i>Consolea spinosissima</i> Lem.                                       | Yes            | Cactaceae                 | E | 66                  | 6              | P | 2,465 | 2.5 | 5.0 | 10.1 | 557 | O | G <sup>c</sup>                | FC:PI |
| 456a | <i>Convolvulus canariensis</i> L.                                       | – <sup>m</sup> | Convolvulaceae            | E | 22, 24 <sup>o</sup> | 4              | P | 1,007 | 1.0 | 2.1 | 4.1  | 552 | O | <i>Solan.</i> <sup>c</sup>    | FC:PI |
| 457a | <i>Convolvulus floridus</i> L.f.                                        | – <sup>m</sup> | Convolvulaceae            | E | 30 <sup>o</sup>     | 6              | P | 1,037 | 1.1 | 2.1 | 4.2  | 477 | O | <i>Glycine</i> <sup>e</sup>   | FC:PI |
| 458a | <i>Convolvulus perraudieri</i> Coss.                                    | – <sup>m</sup> | Convolvulaceae            | E | 30                  | 6              | P | 1,042 | 1.1 | 2.1 | 4.3  | 477 | O | <i>Glycine</i> <sup>e</sup>   | FC:PI |
| 459a | <i>Convolvulus scoparius</i> L.f.                                       | – <sup>m</sup> | Convolvulaceae            | E | 30 <sup>o</sup>     | 6              | P | 1,042 | 1.1 | 2.1 | 4.3  | 552 | O | <i>Solan.</i> <sup>c</sup>    | FC:PI |
| 460a | <i>Coriandrum sativum</i> L.                                            | No             | Apiaceae <sup>j</sup>     | E | – <sup>n</sup>      | – <sup>p</sup> | A | 2,484 | 2.5 | 5.1 | 10.2 | 563 | O | G <sup>c</sup>                | FC:PI |
| 462a | <i>Cortaderia richardii</i> (Endl.) Zotov                               | Yes            | Poaceae <sup>j</sup>      | M | 90                  | 10             | P | 3,839 | 3.9 | 7.9 | 15.7 | 528 | O | – <sup>w</sup>                | FC:PI |
| 462b | <i>Cortaderia richardii</i> (Endl.) Zotov                               | Yes            | Poaceae <sup>j</sup>      | M | 90                  | 10             | P | 2,298 | 2.4 | 4.7 | 9.4  | 476 | O | <i>Actinidia</i> <sup>c</sup> | FC:PI |
| 463a | <i>Cortaderia splendens</i> Connor <sup>3</sup>                         | Yes            | Poaceae <sup>j</sup>      | M | 90                  | 10             | P | 3,770 | 3.9 | 7.7 | 15.4 | 528 | O | – <sup>w</sup>                | FC:PI |
| 463b | <i>Cortaderia splendens</i> Connor <sup>3</sup>                         | Yes            | Poaceae <sup>j</sup>      | M | 90                  | 10             | P | 4,152 | 4.2 | 8.5 | 17.0 | 528 | O | – <sup>w</sup>                | FC:PI |
| 464a | <i>Cortaderia toetoe</i> Zotov                                          | Yes            | Poaceae <sup>j</sup>      | M | 90                  | 10             | P | 3,883 | 4.0 | 7.9 | 15.9 | 528 | O | – <sup>w</sup>                | FC:PI |
| 464a | <i>Cortaderia fulvida</i> (Buchanan) Zotov <sup>1</sup>                 | Yes            | Poaceae <sup>j</sup>      | M | 90                  | 10             | P | 4,088 | 4.2 | 8.4 | 16.7 | 528 | O | – <sup>w</sup>                | FC:PI |
| 465a | <i>Cortaderia turbaria</i> Connor                                       | Yes            | Poaceae <sup>j</sup>      | M | 90                  | 10             | P | 4,685 | 4.8 | 9.6 | 19.2 | 528 | O | – <sup>w</sup>                | FC:PI |
| 466b | <i>Corylus avellana</i> L. <sup>1</sup>                                 | Yes            | Betulaceae                | E | – <sup>n</sup>      | – <sup>p</sup> | P | 391   | 0.4 | 0.8 | 1.6  | 489 | O | – <sup>w</sup>                | FC:EB |
| 466c | <i>Corylus avellana</i> L. <sup>1</sup>                                 | Yes            | Betulaceae                | E | – <sup>n</sup>      | – <sup>p</sup> | P | 460   | 0.5 | 0.9 | 1.9  | 489 | O | – <sup>w</sup>                | FC:EB |
| 467a | <i>Corynocarpus laevigatus</i> J.R.Forst. & G.Forst.                    | No             | Corynocarpaceae           | E | 44 <sup>o</sup>     | – <sup>p</sup> | P | 753   | 0.8 | 1.5 | 3.1  | 612 | O | <i>Solan.</i> <sup>c</sup>    | FC:PI |
| 468a | <i>Crambe arborea</i> Webb ex Christ var. <i>indivisa</i>               | – <sup>m</sup> | Brassicaceae <sup>j</sup> | E | 30 <sup>o</sup>     | 6              | P | 910   | 0.9 | 1.9 | 3.7  | 477 | O | <i>Glycine</i> <sup>e</sup>   | FC:PI |
| 469a | <i>Crambe cordifolia</i> Stev.                                          | No             | Brassicaceae <sup>j</sup> | E | c. 120              | 8              | P | 4,630 | 4.7 | 9.5 | 18.9 | 602 | O | <i>Solan.</i> <sup>c</sup>    | FC:PI |
| 470a | <i>Crambe laevigata</i> DC. ex Christ                                   | – <sup>m</sup> | Brassicaceae <sup>j</sup> | E | ~30                 | 6              | P | 929   | 1.0 | 1.9 | 3.8  | 477 | O | <i>Glycine</i> <sup>e</sup>   | FC:PI |
| 471a | <i>Crambe maritima</i> L.                                               | No             | Brassicaceae <sup>j</sup> | E | 60                  | 4              | P | 2,365 | 2.4 | 4.8 | 9.7  | 602 | O | <i>Solan.</i> <sup>c</sup>    | FC:PI |

Continued

| Entry number <sup>e</sup> | Species                                                                                   | Voucher        | Family                    | Higher group <sup>#</sup> | 2n <sup>‡</sup> | Ploidy level (x) | Life cycle type <sup>§</sup> | DNA amount             |                |         |         | Original ref. <sup>a</sup> | Present amount <sup>†</sup> | Standard species* <sup>b1</sup> | Method <sup>††</sup> |
|---------------------------|-------------------------------------------------------------------------------------------|----------------|---------------------------|---------------------------|-----------------|------------------|------------------------------|------------------------|----------------|---------|---------|----------------------------|-----------------------------|---------------------------------|----------------------|
|                           |                                                                                           |                |                           |                           |                 |                  |                              | 1C (Mbp <sup>b</sup> ) | 1C (pg)        | 2C (pg) | 4C (pg) |                            |                             |                                 |                      |
| 472a                      | <i>Crambe scaberrima</i><br>Webb ex Bramw.                                                | – <sup>m</sup> | Brassicaceae <sup>j</sup> | E                         | ~30             | 6                | P                            | 905                    | 0.9            | 1.9     | 3.7     | 477                        | O                           | <i>Glycine</i> <sup>e</sup>     | FC:PI                |
| 473a                      | <i>Crambe strigosa</i> L'Hér.                                                             | – <sup>m</sup> | Brassicaceae <sup>j</sup> | E                         | 30 <sup>o</sup> | 6                | P                            | 968                    | 1.0            | 2.0     | 4.0     | 477                        | O                           | <i>Glycine</i> <sup>e</sup>     | FC:PI                |
| 474a                      | <i>Crataegus aemula</i><br>Beadle <sup>i</sup>                                            | Yes            | Rosaceae                  | E                         | – <sup>n</sup>  | 3 <sup>z</sup>   | P                            | – <sup>t</sup>         | – <sup>t</sup> | 2.6     | 5.1     | 527                        | O                           | G <sup>c</sup>                  | FC:PI                |
| 474b                      | <i>Crataegus aemula</i><br>Beadle <sup>i</sup>                                            | Yes            | Rosaceae                  | E                         | – <sup>n</sup>  | 4 <sup>z</sup>   | P                            | 1,545                  | 1.6            | 3.2     | 6.3     | 527                        | O                           | G <sup>c</sup>                  | FC:PI                |
| 475a                      | <i>Crataegus aestivalis</i><br>(Walter) Torr. &<br>A.Gray                                 | Yes            | Rosaceae                  | E                         | – <sup>n</sup>  | – <sup>p</sup>   | P                            | 616                    | 0.6            | 1.3     | 2.5     | 527                        | O                           | G <sup>c</sup>                  | FC:PI                |
| 476a                      | <i>Crataegus agrestina</i><br>Beadle                                                      | Yes            | Rosaceae                  | E                         | – <sup>n</sup>  | 4 <sup>z</sup>   | P                            | 1,594                  | 1.6            | 3.3     | 6.5     | 527                        | O                           | G <sup>c</sup>                  | FC:PI                |
| 477a                      | <i>Crataegus aprica</i> Beadle                                                            | Yes            | Rosaceae                  | E                         | – <sup>n</sup>  | 3 <sup>z</sup>   | P                            | – <sup>t</sup>         | – <sup>t</sup> | 2.0     | 4.0     | 527                        | O                           | G <sup>c</sup>                  | FC:PI                |
| 478a                      | <i>Crataegus arnoldiana</i><br>Sarg.                                                      | Yes            | Rosaceae                  | E                         | – <sup>n</sup>  | 4 <sup>z</sup>   | P                            | 1,403                  | 1.4            | 2.9     | 5.7     | 527                        | O                           | G <sup>c</sup>                  | FC:PI                |
| 479a                      | <i>Crataegus ashei</i> Beadle <sup>i</sup>                                                | Yes            | Rosaceae                  | E                         | – <sup>n</sup>  | 4 <sup>z</sup>   | P                            | 1,413                  | 1.4            | 2.9     | 5.8     | 527                        | O                           | G <sup>c</sup>                  | FC:PI                |
| 479b                      | <i>Crataegus ashei</i> Beadle <sup>i</sup>                                                | Yes            | Rosaceae                  | E                         | – <sup>n</sup>  | – <sup>p</sup>   | P                            | 1,707                  | 1.7            | 3.5     | 7.0     | 527                        | O                           | G <sup>c</sup>                  | FC:PI                |
| 480a                      | <i>Crataegus brachyacantha</i><br>Sarg. & Engelm. <sup>i</sup>                            | Yes            | Rosaceae                  | E                         | – <sup>n</sup>  | 2-3 <sup>z</sup> | P                            | 919                    | 0.9            | 1.9     | 3.8     | 527                        | O                           | G <sup>c</sup>                  | FC:PI                |
| 481a                      | <i>Crataegus calpodendron</i><br>(Ehrh.) Medik. <sup>i</sup>                              | Yes            | Rosaceae                  | E                         | – <sup>n</sup>  | 2 <sup>z</sup>   | P                            | 773                    | 0.8            | 1.6     | 3.2     | 527                        | O                           | G <sup>c</sup>                  | FC:PI                |
| 481b                      | <i>Crataegus calpodendron</i><br>(Ehrh.) Medik. <sup>i</sup>                              | Yes            | Rosaceae                  | E                         | – <sup>n</sup>  | 2-3 <sup>z</sup> | P                            | 890                    | 0.9            | 1.8     | 3.6     | 527                        | O                           | G <sup>c</sup>                  | FC:PI                |
| 482a                      | <i>Crataegus castlegarensis</i><br>J.B.Phipps <sup>i</sup>                                | Yes            | Rosaceae                  | E                         | – <sup>n</sup>  | 4 <sup>z</sup>   | P                            | 1,330                  | 1.4            | 2.7     | 5.4     | 527                        | O                           | G <sup>c</sup>                  | FC:PI                |
| 482b                      | <i>Crataegus castlegarensis</i><br>J.B.Phipps <sup>i</sup>                                | Yes            | Rosaceae                  | E                         | – <sup>n</sup>  | >4 <sup>z</sup>  | P                            | 1,785                  | 1.8            | 3.7     | 7.3     | 527                        | O                           | G <sup>c</sup>                  | FC:PI                |
| 483a                      | <i>Crataegus chlorosarca</i><br>Maxim.                                                    | Yes            | Rosaceae                  | E                         | – <sup>n</sup>  | 2 <sup>z</sup>   | P                            | 797                    | 0.8            | 1.6     | 3.3     | 527                        | O                           | G <sup>c</sup>                  | FC:PI                |
| 484a                      | <i>Crataegus chrysocarpa</i><br>Ashe var. <i>aboriginum</i><br>(Sarg.) Kuschke            | Yes            | Rosaceae                  | E                         | – <sup>n</sup>  | 3 <sup>z</sup>   | P                            | – <sup>t</sup>         | – <sup>t</sup> | 2.5     | 5.1     | 527                        | O                           | G <sup>c</sup>                  | FC:PI                |
| 484b                      | <i>Crataegus chrysocarpa</i><br>Ashe var. <i>phoenicea</i><br>Palmer                      | Yes            | Rosaceae                  | E                         | – <sup>n</sup>  | 3-4 <sup>z</sup> | P                            | 1,276                  | 1.3            | 2.6     | 5.2     | 527                        | O                           | G <sup>c</sup>                  | FC:PI                |
| 484c                      | <i>Crataegus chrysocarpa</i><br>Ashe var. <i>piperi</i><br>(Britton) Kuschke <sup>i</sup> | Yes            | Rosaceae                  | E                         | – <sup>n</sup>  | 4 <sup>z</sup>   | P                            | 1,477                  | 1.5            | 3.0     | 6.0     | 527                        | O                           | G <sup>c</sup>                  | FC:PI                |
| 484d                      | <i>Crataegus chrysocarpa</i><br>Ashe                                                      | Yes            | Rosaceae                  | E                         | – <sup>n</sup>  | 4 <sup>z</sup>   | P                            | 1,413                  | 1.4            | 2.9     | 5.8     | 527                        | O                           | G <sup>c</sup>                  | FC:PI                |
| 485a                      | <i>Crataegus collina</i><br>Chapm. <sup>i</sup>                                           | Yes            | Rosaceae                  | E                         | – <sup>n</sup>  | 2-3 <sup>z</sup> | P                            | 978                    | 1.0            | 2.0     | 4.0     | 527                        | O                           | G <sup>c</sup>                  | FC:PI                |
| 485b                      | <i>Crataegus collina</i><br>Chapm. <sup>i</sup>                                           | Yes            | Rosaceae                  | E                         | – <sup>n</sup>  | 3-4 <sup>z</sup> | P                            | 1,257                  | 1.3            | 2.6     | 5.1     | 527                        | O                           | G <sup>c</sup>                  | FC:PI                |
| 486a                      | <i>Crataegus compacta</i><br>Sarg.                                                        | Yes            | Rosaceae                  | E                         | – <sup>n</sup>  | 3 <sup>z</sup>   | P                            | – <sup>t</sup>         | – <sup>t</sup> | 2.4     | 4.7     | 527                        | O                           | G <sup>c</sup>                  | FC:PI                |
| 487b                      | <i>Crataegus crus-galli</i><br>L. s.l. <sup>i</sup>                                       | Yes            | Rosaceae                  | E                         | – <sup>n</sup>  | – <sup>p</sup>   | P                            | 587                    | 0.6            | 1.2     | 2.4     | 527                        | O                           | G <sup>c</sup>                  | FC:PI                |
| 487c                      | <i>Crataegus crus-galli</i><br>L. s.l. <sup>i</sup>                                       | Yes            | Rosaceae                  | E                         | – <sup>n</sup>  | – <sup>p</sup>   | P                            | 1,682                  | 1.7            | 3.4     | 6.9     | 527                        | O                           | G <sup>c</sup>                  | FC:PI                |

|      |                                                                  |     |          |   |                |                  |   |                |                |     |     |     |   |                |       |
|------|------------------------------------------------------------------|-----|----------|---|----------------|------------------|---|----------------|----------------|-----|-----|-----|---|----------------|-------|
| 488a | <i>Crataegus dahurica</i> Koehne                                 | Yes | Rosaceae | E | – <sup>n</sup> | 2 <sup>z</sup>   | P | 807            | 0.8            | 1.7 | 3.3 | 527 | O | G <sup>c</sup> | FC:PI |
| 489a | <i>Crataegus dodgei</i> Ashe <sup>i</sup>                        | Yes | Rosaceae | E | – <sup>n</sup> | 4 <sup>z</sup>   | P | 1,555          | 1.6            | 3.2 | 6.4 | 527 | O | G <sup>c</sup> | FC:PI |
| 490a | <i>Crataegus douglasii</i> Lindl. <sup>1</sup>                   | Yes | Rosaceae | E | – <sup>n</sup> | 3-4 <sup>z</sup> | P | 1,296          | 1.3            | 2.7 | 5.3 | 527 | O | G <sup>c</sup> | FC:PI |
| 490b | <i>Crataegus douglasii</i> Lindl. <sup>1</sup>                   | Yes | Rosaceae | E | – <sup>n</sup> | 4 <sup>z</sup>   | P | 1,609          | 1.6            | 3.3 | 6.6 | 527 | O | G <sup>c</sup> | FC:PI |
| 491a | <i>Crataegus enderbyensis</i> J.B.Phipps & O'Kennon <sup>i</sup> | Yes | Rosaceae | E | – <sup>n</sup> | 4 <sup>z</sup>   | P | 1,526          | 1.6            | 3.1 | 6.2 | 527 | O | G <sup>c</sup> | FC:PI |
| 492a | <i>Crataegus finitima</i> Sarg.                                  | Yes | Rosaceae | E | – <sup>n</sup> | 3 <sup>z</sup>   | P | – <sup>t</sup> | – <sup>t</sup> | 2.3 | 4.6 | 527 | O | G <sup>c</sup> | FC:PI |
| 493a | <i>Crataegus flavida</i> Sarg.                                   | Yes | Rosaceae | E | – <sup>n</sup> | – <sup>p</sup>   | P | 1,726          | 1.8            | 3.5 | 7.1 | 527 | O | G <sup>c</sup> | FC:PI |
| 494a | <i>Crataegus greggiana</i> Eggl.                                 | Yes | Rosaceae | E | – <sup>n</sup> | 4 <sup>z</sup>   | P | 1,340          | 1.4            | 2.7 | 5.5 | 527 | O | G <sup>c</sup> | FC:PI |
| 495a | <i>Crataegus harbisonii</i> Beadle <sup>i</sup>                  | Yes | Rosaceae | E | – <sup>n</sup> | 4 <sup>z</sup>   | P | 1,555          | 1.6            | 3.2 | 6.4 | 527 | O | G <sup>c</sup> | FC:PI |
| 496a | <i>Crataegus heldreichii</i> Boiss.                              | Yes | Rosaceae | E | – <sup>n</sup> | 2 <sup>z</sup>   | P | 778            | 0.8            | 1.6 | 3.2 | 527 | O | G <sup>c</sup> | FC:PI |
| 497a | <i>Crataegus hupehensis</i> Sarg. <sup>i</sup>                   | Yes | Rosaceae | E | – <sup>n</sup> | 2-3 <sup>z</sup> | P | 880            | 0.9            | 1.8 | 3.6 | 527 | O | G <sup>c</sup> | FC:PI |
| 497b | <i>Crataegus hupehensis</i> Sarg. <sup>i</sup>                   | Yes | Rosaceae | E | – <sup>n</sup> | 3 <sup>z</sup>   | P | – <sup>t</sup> | – <sup>t</sup> | 2.3 | 4.6 | 527 | O | G <sup>c</sup> | FC:PI |
| 498a | <i>Crataegus irrasa</i> Sarg. <sup>i</sup>                       | Yes | Rosaceae | E | – <sup>n</sup> | 4 <sup>z</sup>   | P | 1,496          | 1.5            | 3.1 | 6.1 | 527 | O | G <sup>c</sup> | FC:PI |
| 499a | <i>Crataegus laevigata</i> (Poir.) DC. <sup>1</sup>              | Yes | Rosaceae | E | – <sup>n</sup> | 2 <sup>z</sup>   | P | 685            | 0.7            | 1.4 | 2.8 | 527 | O | G <sup>c</sup> | FC:PI |
| 500a | <i>Crataegus laevigata</i> (Poir.) DC. <sup>1</sup>              | Yes | Rosaceae | E | – <sup>n</sup> | 4 <sup>z</sup>   | P | 1,526          | 1.6            | 3.1 | 6.2 | 527 | O | G <sup>c</sup> | FC:PI |
| 501a | <i>Crataegus lepida</i> Beadle                                   | Yes | Rosaceae | E | – <sup>n</sup> | 3-4 <sup>z</sup> | P | 1,271          | 1.3            | 2.6 | 5.2 | 527 | O | G <sup>c</sup> | FC:PI |
| 502a | <i>Crataegus macracantha</i> Lodd. ex Loudon <sup>i</sup>        | Yes | Rosaceae | E | – <sup>n</sup> | 4 <sup>z</sup>   | P | 1,457          | 1.5            | 3.0 | 6.0 | 527 | O | G <sup>c</sup> | FC:PI |
| 502b | <i>Crataegus macracantha</i> Lodd. ex Loudon <sup>i</sup>        | Yes | Rosaceae | E | – <sup>n</sup> | 4 <sup>z</sup>   | P | 1,638          | 1.7            | 3.4 | 6.7 | 527 | O | G <sup>c</sup> | FC:PI |
| 503a | <i>Crataegus macrosperma</i> Ashe                                | Yes | Rosaceae | E | – <sup>n</sup> | 4 <sup>z</sup>   | P | 1,521          | 1.6            | 3.1 | 6.2 | 527 | O | G <sup>c</sup> | FC:PI |
| 504a | <i>Crataegus marshallii</i> Eggl. <sup>1</sup>                   | Yes | Rosaceae | E | – <sup>n</sup> | 2-3 <sup>z</sup> | P | 856            | 0.9            | 1.8 | 3.5 | 527 | O | G <sup>c</sup> | FC:PI |
| 505a | <i>Crataegus mollis</i> Scheele <sup>i</sup>                     | Yes | Rosaceae | E | – <sup>n</sup> | 2 <sup>z</sup>   | P | 714            | 0.7            | 1.5 | 2.9 | 527 | O | G <sup>c</sup> | FC:PI |
| 505b | <i>Crataegus mollis</i> Scheele <sup>i</sup>                     | Yes | Rosaceae | E | – <sup>n</sup> | 3 <sup>z</sup>   | P | – <sup>t</sup> | – <sup>t</sup> | 2.4 | 4.8 | 527 | O | G <sup>c</sup> | FC:PI |
| 506a | <i>Crataegus monogyna</i> Jacq. <sup>1</sup>                     | Yes | Rosaceae | E | – <sup>n</sup> | 2 <sup>z</sup>   | P | 660            | 0.7            | 1.4 | 2.7 | 527 | O | G <sup>c</sup> | FC:PI |
| 506b | <i>Crataegus monogyna</i> Jacq. <sup>1</sup>                     | Yes | Rosaceae | E | – <sup>n</sup> | 3 <sup>z</sup>   | P | – <sup>t</sup> | – <sup>t</sup> | 2.3 | 4.5 | 527 | O | G <sup>c</sup> | FC:PI |
| 507a | <i>Crataegus munda</i> Beadle <sup>i</sup>                       | Yes | Rosaceae | E | – <sup>n</sup> | 3 <sup>z</sup>   | P | – <sup>t</sup> | – <sup>t</sup> | 2.5 | 5.0 | 527 | O | G <sup>c</sup> | FC:PI |
| 508a | <i>Crataegus nigra</i> Waldst. & Kit.                            | Yes | Rosaceae | E | – <sup>n</sup> | 2 <sup>z</sup>   | P | 822            | 0.8            | 1.7 | 3.4 | 527 | O | G <sup>c</sup> | FC:PI |
| 509a | <i>Crataegus nitida</i> (Engelm.) Sarg.                          | Yes | Rosaceae | E | – <sup>n</sup> | 3 <sup>z</sup>   | P | – <sup>t</sup> | – <sup>t</sup> | 2.0 | 4.1 | 527 | O | G <sup>c</sup> | FC:PI |
| 510a | <i>Crataegus okennonii</i> J.B.Phipps                            | Yes | Rosaceae | E | – <sup>n</sup> | 4 <sup>z</sup>   | P | 1,633          | 1.7            | 3.3 | 6.7 | 527 | O | G <sup>c</sup> | FC:PI |
| 511a | <i>Crataegus opaca</i> Hook. & Arn. ex Hook. <sup>1</sup>        | Yes | Rosaceae | E | – <sup>n</sup> | – <sup>p</sup>   | P | 611            | 0.6            | 1.3 | 2.5 | 527 | O | G <sup>c</sup> | FC:PI |
| 511b | <i>Crataegus opaca</i> Hook. & Arn. ex Hook. <sup>1</sup>        | Yes | Rosaceae | E | – <sup>n</sup> | 2 <sup>z</sup>   | P | 778            | 0.8            | 1.6 | 3.2 | 527 | O | G <sup>c</sup> | FC:PI |
| 512a | <i>Crataegus phaenopyrum</i> (L.f.) Medik. <sup>1</sup>          | Yes | Rosaceae | E | – <sup>n</sup> | 3 <sup>z</sup>   | P | – <sup>t</sup> | – <sup>t</sup> | 2.4 | 4.7 | 527 | O | G <sup>c</sup> | FC:PI |
| 512b | <i>Crataegus phaenopyrum</i> (L.f.) Medik. <sup>1</sup>          | Yes | Rosaceae | E | – <sup>n</sup> | – <sup>p</sup>   | P | 1,800          | 1.8            | 3.7 | 7.4 | 527 | O | G <sup>c</sup> | FC:PI |

Continued

| Entry number <sup>e</sup> | Species                                                    | Voucher | Family   | Higher group <sup>#</sup> | 2n <sup>‡</sup> | Ploidy level (x) | Life cycle type <sup>§</sup> | DNA amount             |                |         |         | Original ref. <sup>a</sup> | Present amount <sup>†</sup> | Standard species <sup>*b1</sup> | Method <sup>††</sup> |
|---------------------------|------------------------------------------------------------|---------|----------|---------------------------|-----------------|------------------|------------------------------|------------------------|----------------|---------|---------|----------------------------|-----------------------------|---------------------------------|----------------------|
|                           |                                                            |         |          |                           |                 |                  |                              | 1C (Mbp <sup>b</sup> ) | 1C (pg)        | 2C (pg) | 4C (pg) |                            |                             |                                 |                      |
| 513a                      | <i>Crataegus phippsii</i> O'Kennon <sup>i</sup>            | Yes     | Rosaceae | E                         | — <sup>n</sup>  | 4 <sup>z</sup>   | P                            | 1,550                  | 1.6            | 3.2     | 6.3     | 527                        | O                           | G <sup>c</sup>                  | FC:PI                |
| 514a                      | <i>Crataegus pinnatifida</i> Bunge <sup>i</sup>            | Yes     | Rosaceae | E                         | — <sup>n</sup>  | 2 <sup>z</sup>   | P                            | 763                    | 0.8            | 1.6     | 3.1     | 527                        | O                           | G <sup>c</sup>                  | FC:PI                |
| 515a                      | <i>Crataegus pinnatifida</i> Bunge <sup>i</sup>            | Yes     | Rosaceae | E                         | — <sup>n</sup>  | 4 <sup>z</sup>   | P                            | 1,565                  | 1.6            | 3.2     | 6.4     | 527                        | O                           | G <sup>c</sup>                  | FC:PI                |
| 516a                      | <i>Crataegus placiva</i> Sarg.                             | Yes     | Rosaceae | E                         | — <sup>n</sup>  | 4 <sup>z</sup>   | P                            | 1,447                  | 1.5            | 3.0     | 5.9     | 527                        | O                           | G <sup>c</sup>                  | FC:PI                |
| 517a                      | <i>Crataegus pruinosa</i> (H.L.Wendl.) K.Koch <sup>i</sup> | Yes     | Rosaceae | E                         | — <sup>n</sup>  | 3 <sup>z</sup>   | P                            | — <sup>t</sup>         | — <sup>t</sup> | 2.4     | 4.8     | 527                        | O                           | G <sup>c</sup>                  | FC:PI                |
| 517b                      | <i>Crataegus pruinosa</i> (H.L.Wendl.) K.Koch <sup>i</sup> | Yes     | Rosaceae | E                         | — <sup>n</sup>  | 4 <sup>z</sup>   | P                            | 1,633                  | 1.7            | 3.3     | 6.7     | 527                        | O                           | G <sup>c</sup>                  | FC:PI                |
| 518a                      | <i>Crataegus punctata</i> Jacq. <sup>i</sup>               | Yes     | Rosaceae | E                         | — <sup>n</sup>  | 2 <sup>z</sup>   | P                            | 655                    | 0.7            | 1.3     | 2.7     | 527                        | O                           | G <sup>c</sup>                  | FC:PI                |
| 518b                      | <i>Crataegus punctata</i> Jacq. <sup>i</sup>               | Yes     | Rosaceae | E                         | — <sup>n</sup>  | 2 <sup>z</sup>   | P                            | 748                    | 0.8            | 1.5     | 3.1     | 527                        | O                           | G <sup>c</sup>                  | FC:PI                |
| 519a                      | <i>Crataegus rivularis</i> Nutt. <sup>i</sup>              | Yes     | Rosaceae | E                         | — <sup>n</sup>  | 4 <sup>z</sup>   | P                            | 1,325                  | 1.4            | 2.7     | 5.4     | 527                        | O                           | G <sup>c</sup>                  | FC:PI                |
| 519b                      | <i>Crataegus rivularis</i> Nutt. <sup>i</sup>              | Yes     | Rosaceae | E                         | — <sup>n</sup>  | > 4 <sup>z</sup> | P                            | 1,677                  | 1.7            | 3.4     | 6.9     | 527                        | O                           | G <sup>c</sup>                  | FC:PI                |
| 520a                      | <i>Crataegus rufula</i> Sarg. <sup>i</sup>                 | Yes     | Rosaceae | E                         | — <sup>n</sup>  | 3 <sup>z</sup>   | P                            | — <sup>t</sup>         | — <sup>t</sup> | 2.0     | 4.1     | 527                        | O                           | G <sup>c</sup>                  | FC:PI                |
| 521a                      | <i>Crataegus saligna</i> Greene <sup>i</sup>               | Yes     | Rosaceae | E                         | — <sup>n</sup>  | 2 <sup>z</sup>   | P                            | 817                    | 0.8            | 1.7     | 3.3     | 527                        | O                           | G <sup>c</sup>                  | FC:PI                |
| 522a                      | <i>Crataegus sargentii</i> Beadle                          | Yes     | Rosaceae | E                         | — <sup>n</sup>  | 2-3 <sup>z</sup> | P                            | 968                    | 1.0            | 2.0     | 4.0     | 527                        | O                           | G <sup>c</sup>                  | FC:PI                |
| 523a                      | <i>Crataegus shuswapensis</i> J.B.Phipps & O'Kennon        | Yes     | Rosaceae | E                         | — <sup>n</sup>  | 2 <sup>z</sup>   | P                            | 709                    | 0.7            | 1.5     | 2.9     | 527                        | O                           | G <sup>c</sup>                  | FC:PI                |
| 524a                      | <i>Crataegus songarica</i> K.Koch                          | Yes     | Rosaceae | E                         | — <sup>n</sup>  | 4 <sup>z</sup>   | P                            | 1,443                  | 1.5            | 3.0     | 5.9     | 527                        | O                           | G <sup>c</sup>                  | FC:PI                |
| 525a                      | <i>Crataegus spathulata</i> Michx. <sup>i</sup>            | Yes     | Rosaceae | E                         | — <sup>n</sup>  | 2 <sup>z</sup>   | P                            | 665                    | 0.7            | 1.4     | 2.7     | 527                        | O                           | G <sup>c</sup>                  | FC:PI                |
| 525b                      | <i>Crataegus spathulata</i> Michx. <sup>i</sup>            | Yes     | Rosaceae | E                         | — <sup>n</sup>  | 2-3 <sup>z</sup> | P                            | 910                    | 0.9            | 1.9     | 3.7     | 527                        | O                           | G <sup>c</sup>                  | FC:PI                |
| 526a                      | <i>Crataegus submollis</i> Sarg. <sup>i</sup>              | Yes     | Rosaceae | E                         | — <sup>n</sup>  | 4 <sup>z</sup>   | P                            | 1,628                  | 1.7            | 3.3     | 6.7     | 527                        | O                           | G <sup>c</sup>                  | FC:PI                |
| 527a                      | <i>Crataegus succulenta</i> Ashe <sup>i</sup>              | Yes     | Rosaceae | E                         | — <sup>n</sup>  | 3 <sup>z</sup>   | P                            | — <sup>t</sup>         | — <sup>t</sup> | 2.4     | 4.8     | 527                        | O                           | G <sup>c</sup>                  | FC:PI                |
| 528a                      | <i>Crataegus suksdorfii</i> (Sarg.) Kruschke <sup>i</sup>  | Yes     | Rosaceae | E                         | — <sup>n</sup>  | 2 <sup>z</sup>   | P                            | 694                    | 0.7            | 1.4     | 2.8     | 527                        | O                           | G <sup>c</sup>                  | FC:PI                |
| 529a                      | <i>Crataegus suksdorfii</i> (Sarg.) Kruschke <sup>i</sup>  | Yes     | Rosaceae | E                         | — <sup>n</sup>  | 4 <sup>z</sup>   | P                            | 1,443                  | 1.5            | 3.0     | 5.9     | 527                        | O                           | G <sup>c</sup>                  | FC:PI                |
| 530a                      | <i>Crataegus triflora</i> Chapm. <sup>i</sup>              | Yes     | Rosaceae | E                         | — <sup>n</sup>  | 2 <sup>z</sup>   | P                            | 660                    | 0.7            | 1.4     | 2.7     | 527                        | O                           | G <sup>c</sup>                  | FC:PI                |
| 531a                      | <i>Crataegus triflora</i> Chapm. <sup>i</sup>              | Yes     | Rosaceae | E                         | — <sup>n</sup>  | 4 <sup>z</sup>   | P                            | 1,311                  | 1.3            | 2.7     | 5.4     | 527                        | O                           | G <sup>c</sup>                  | FC:PI                |
| 532a                      | <i>Crataegus uniflora</i> Muench. <sup>i</sup>             | Yes     | Rosaceae | E                         | — <sup>n</sup>  | 4 <sup>z</sup>   | P                            | 1,340                  | 1.4            | 2.7     | 5.5     | 527                        | O                           | G <sup>c</sup>                  | FC:PI                |
| 533a                      | <i>Crataegus viburnifolia</i> Sarg. <sup>i</sup>           | Yes     | Rosaceae | E                         | — <sup>n</sup>  | 2-3 <sup>z</sup> | P                            | 949                    | 1.0            | 1.9     | 3.9     | 527                        | O                           | G <sup>c</sup>                  | FC:PI                |
| 533b                      | <i>Crataegus viburnifolia</i> Sarg. <sup>i</sup>           | Yes     | Rosaceae | E                         | — <sup>n</sup>  | 3 <sup>z</sup>   | P                            | — <sup>t</sup>         | — <sup>t</sup> | 2.5     | 5.0     | 527                        | O                           | G <sup>c</sup>                  | FC:PI                |
| 534a                      | <i>Crataegus viridis</i> L. <sup>i</sup>                   | Yes     | Rosaceae | E                         | — <sup>n</sup>  | 2 <sup>z</sup>   | P                            | 826                    | 0.8            | 1.7     | 3.4     | 527                        | O                           | G <sup>c</sup>                  | FC:PI                |
| 534b                      | <i>Crataegus viridis</i> L. <sup>i</sup>                   | Yes     | Rosaceae | E                         | — <sup>n</sup>  | 3 <sup>z</sup>   | P                            | — <sup>t</sup>         | — <sup>t</sup> | 2.5     | 5.0     | 527                        | O                           | G <sup>c</sup>                  | FC:PI                |



|      |                                                                                                   |                |                           |   |                 |                |                |                |                |     |     |     |   |                        |       |
|------|---------------------------------------------------------------------------------------------------|----------------|---------------------------|---|-----------------|----------------|----------------|----------------|----------------|-----|-----|-----|---|------------------------|-------|
| 535a | <i>Crataegus wattiana</i><br>Hemsl. & Lace <sup>i</sup>                                           | Yes            | Rosaceae                  | E | – <sup>n</sup>  | 3 <sup>z</sup> | P              | – <sup>t</sup> | – <sup>t</sup> | 2.4 | 4.7 | 527 | O | G <sup>c</sup>         | FC:PI |
| 535b | <i>Crataegus wattiana</i><br>Hemsl. & Lace <sup>i</sup>                                           | Yes            | Rosaceae                  | E | – <sup>n</sup>  | 4 <sup>z</sup> | P              | 1,594          | 1.6            | 3.3 | 6.5 | 527 | O | G <sup>c</sup>         | FC:PI |
| 536a | <i>Crataegus wilsonii</i> Sarg. <sup>1</sup>                                                      | Yes            | Rosaceae                  | E | – <sup>n</sup>  | 2 <sup>z</sup> | P              | 787            | 0.8            | 1.6 | 3.2 | 527 | O | G <sup>c</sup>         | FC:PI |
| 537i | <i>Crepis capillaris</i> (L.)<br>Wallr.                                                           | No             | Asteraceae <sup>j</sup>   | E | – <sup>n</sup>  | – <sup>p</sup> | A              | 2,196          | 2.2            | 4.5 | 9.0 | 518 | O | Raphanus <sup>c</sup>  | FC:PI |
| 538a | <i>Crinodendron patagua</i><br>Molina                                                             | No             | Elaeocarpaceae            | E | 16              | – <sup>p</sup> | P              | 293            | 0.3            | 0.6 | 1.2 | 612 | O | J                      | Fe    |
| 539a | <i>Crithmum maritimum</i> L.                                                                      | Yes            | Apiaceae <sup>j</sup>     | E | 20 <sup>o</sup> | 2              | P              | 2,142          | 2.2            | 4.4 | 8.8 | 580 | O | G <sup>c</sup>         | CIA   |
| 540a | <i>Crucihimalaya himalaica</i><br>(Edgeworth)                                                     | – <sup>m</sup> | Brassicaceae <sup>j</sup> | E | 16              | – <sup>p</sup> | – <sup>q</sup> | 316            | 0.3            | 0.6 | 1.3 | 509 | O | – <sup>w</sup>         | FC:PI |
| 541a | <i>Crucihimalaya</i><br><i>mollissima</i> (C.A.Mey.)<br>Al-Shehbaz, O’Kane &<br>R.A.Price         | Yes            | Brassicaceae <sup>j</sup> | E | 32              | 4              | – <sup>q</sup> | 528            | 0.5            | 1.1 | 2.2 | 599 | O | L                      | FC:PI |
| 542a | <i>Crucihimalaya wallichii</i><br>(Hook.f. & Thomson)<br>Al-Shehbaz, O’Kane &<br>R.A.Price        | Yes            | Brassicaceae <sup>j</sup> | E | 16              | 2              | – <sup>q</sup> | 293            | 0.3            | 0.6 | 1.2 | 599 | O | L                      | FC:PI |
| 542b | <i>Crucihimalaya wallichii</i><br>(J.D.Hooker &<br>Thompson)<br>Al-Shehbaz, O’Kane &<br>R.A.Price | – <sup>m</sup> | Brassicaceae <sup>j</sup> | E | 16              | – <sup>p</sup> | – <sup>q</sup> | 323            | 0.3            | 0.7 | 1.3 | 509 | O | – <sup>w</sup>         | FC:PI |
| 543a | <i>Cryptanthus acaulis</i><br>(Lindl.) Beer                                                       | Yes            | Bromeliaceae              | M | 34              | 2              | P              | 675            | 0.7            | 1.4 | 2.8 | 571 | O | Glycine <sup>c</sup>   | FC:PI |
| 544a | <i>Cryptanthus bahianus</i><br>L.B.Sm.                                                            | Yes            | Bromeliaceae              | M | 34 <sup>o</sup> | 2              | P              | 367            | 0.4            | 0.8 | 1.5 | 571 | O | Glycine <sup>c</sup>   | FC:PI |
| 545a | <i>Cryptanthus beuckeri</i><br>E.Morren                                                           | Yes            | Bromeliaceae              | M | – <sup>n</sup>  | 2              | P              | 713            | 0.7            | 1.5 | 2.9 | 571 | O | Glycine <sup>c</sup>   | FC:PI |
| 546a | <i>Cryptanthus</i><br><i>schwackeanus</i> Mez                                                     | Yes            | Bromeliaceae              | M | 34              | 2              | P              | 347            | 0.4            | 0.7 | 1.4 | 571 | O | Glycine <sup>c</sup>   | FC:PI |
| 547a | <i>Cryptotaenia elegans</i><br>Webb ex Bolle                                                      | – <sup>m</sup> | Apiaceae <sup>j</sup>     | E | 16              | 2              | B              | 460            | 0.5            | 0.9 | 1.9 | 552 | O | Solan. <sup>c</sup>    | FC:PI |
| 548g | <i>Cucumis sativus</i> L.                                                                         | Yes            | Cucurbitaceae             | E | – <sup>n</sup>  | – <sup>p</sup> | A              | 504            | 0.5            | 1.0 | 2.1 | 492 | O | Raphanus <sup>c</sup>  | FC:PI |
| 549a | <i>Cucurbita argyrosperma</i><br>Huber var.<br><i>argyrosperma</i>                                | No             | Cucurbitaceae             | E | 40 <sup>o</sup> | 2              | A              | 366            | 0.4            | 0.7 | 1.5 | 500 | O | Trifolium <sup>c</sup> | FC:PI |
| 549b | <i>Cucurbita argyrosperma</i><br>Huber var. <i>callicarpa</i>                                     | No             | Cucurbitaceae             | E | 40 <sup>o</sup> | 2              | A              | 372            | 0.4            | 0.8 | 1.5 | 500 | O | Trifolium <sup>c</sup> | FC:PI |
| 549c | <i>Cucurbita argyrosperma</i><br>Huber var. <i>palmeri</i>                                        | No             | Cucurbitaceae             | E | 40 <sup>o</sup> | 2              | A              | 374            | 0.4            | 0.8 | 1.5 | 500 | O | Trifolium <sup>c</sup> | FC:PI |
| 549d | <i>Cucurbita argyrosperma</i><br>Huber var.<br><i>stenosperma</i>                                 | No             | Cucurbitaceae             | E | 40 <sup>o</sup> | 2              | A              | 379            | 0.4            | 0.8 | 1.6 | 500 | O | Trifolium <sup>c</sup> | FC:PI |
| 550a | <i>Cucurbita cylindrata</i><br>L.H.Bailey                                                         | No             | Cucurbitaceae             | E | 40 <sup>o</sup> | 2              | A              | 410            | 0.4            | 0.8 | 1.7 | 500 | O | Trifolium <sup>c</sup> | FC:PI |
| 551a | <i>Cucurbita ecuadorensis</i><br>H.C.Cutler & Whitaker                                            | No             | Cucurbitaceae             | E | 40 <sup>o</sup> | 2              | A              | 354            | 0.4            | 0.7 | 1.4 | 500 | O | Trifolium <sup>c</sup> | FC:PI |
| 552a | <i>Cucurbita ficifolia</i><br>Bouché                                                              | No             | Cucurbitaceae             | E | 40 <sup>o</sup> | 2              | A              | 456            | 0.5            | 0.9 | 1.9 | 500 | O | Trifolium <sup>c</sup> | FC:PI |
| 553a | <i>Cucurbita foetidissima</i><br>Kunth                                                            | No             | Cucurbitaceae             | E | 40 <sup>o</sup> | 2              | P              | 335            | 0.3            | 0.7 | 1.4 | 500 | O | Trifolium <sup>c</sup> | FC:PI |

Continued

| Entry number <sup>g</sup> | Species                                                             | Voucher | Family        | Higher group <sup>#</sup> | 2n <sup>‡</sup> | Ploidy level (x) | Life cycle type <sup>§</sup> | DNA amount             |                |         |         | Original ref. <sup>a</sup> | Present amount <sup>†</sup> | Standard species* <sup>b1</sup> | Method <sup>††</sup> |
|---------------------------|---------------------------------------------------------------------|---------|---------------|---------------------------|-----------------|------------------|------------------------------|------------------------|----------------|---------|---------|----------------------------|-----------------------------|---------------------------------|----------------------|
|                           |                                                                     |         |               |                           |                 |                  |                              | 1C (Mbp <sup>b</sup> ) | 1C (pg)        | 2C (pg) | 4C (pg) |                            |                             |                                 |                      |
| 554a                      | <i>Cucurbita lundelliana</i> L.H.Bailey                             | No      | Cucurbitaceae | E                         | 40 <sup>o</sup> | 2                | A                            | 350                    | 0.4            | 0.7     | 1.4     | 500                        | O                           | <i>Trifolium</i> <sup>c</sup>   | FC:PI                |
| 555a                      | <i>Cucurbita maxima</i> Duch. ex Lam. cv. Prizewinner               | No      | Cucurbitaceae | E                         | 40              | — <sup>p</sup>   | A                            | 450                    | 0.5            | 0.9     | 1.8     | 564                        | O                           | H <sup>c</sup>                  | FC:PI                |
| 555b                      | <i>Cucurbita maxima</i> <sup>1</sup>                                | No      | Cucurbitaceae | E                         | 40 <sup>o</sup> | 2                | A                            | 434                    | 0.4            | 0.9     | 1.8     | 500                        | O                           | <i>Trifolium</i> <sup>c</sup>   | FC:PI                |
| 556b                      | <i>Cucurbita moschata</i> (Duch. ex Lam.) Duch. ex Poir.            | Yes     | Cucurbitaceae | E                         | — <sup>n</sup>  | — <sup>p</sup>   | A                            | 474                    | 0.5            | 1.0     | 1.9     | 492                        | O                           | <i>Raphanus</i> <sup>c</sup>    | FC:PI                |
| 556c                      | <i>Cucurbita moschata</i> <sup>1</sup>                              | No      | Cucurbitaceae | E                         | 40 <sup>o</sup> | 2                | A                            | 346                    | 0.4            | 0.7     | 1.4     | 500                        | O                           | <i>Trifolium</i> <sup>c</sup>   | FC:PI                |
| 557a                      | <i>Cucurbita okeechobeensis</i> L.H.Bailey subsp. <i>martinezii</i> | No      | Cucurbitaceae | E                         | 40 <sup>o</sup> | 2                | A                            | 360                    | 0.4            | 0.7     | 1.5     | 500                        | O                           | <i>Trifolium</i> <sup>c</sup>   | FC:PI                |
| 558a                      | <i>Cucurbita pedatifolia</i> L.H.Bailey                             | No      | Cucurbitaceae | E                         | 40 <sup>o</sup> | 2                | A                            | 378                    | 0.4            | 0.8     | 1.5     | 500                        | O                           | <i>Trifolium</i> <sup>c</sup>   | FC:PI                |
| 559e                      | <i>Cucurbita pepo</i> L.                                            | Yes     | Cucurbitaceae | E                         | — <sup>n</sup>  | — <sup>p</sup>   | A                            | 577                    | 0.6            | 1.2     | 2.4     | 492                        | O                           | <i>Glycine</i> <sup>e</sup>     | FC:PI                |
| 559f                      | <i>Cucurbita pepo</i> var. <i>fratema</i> <sup>1</sup>              | No      | Cucurbitaceae | E                         | 40 <sup>o</sup> | 2                | A                            | 423                    | 0.4            | 0.9     | 1.7     | 500                        | O                           | <i>Trifolium</i> <sup>c</sup>   | FC:PI                |
| 559g                      | <i>Cucurbita pepo</i> var. <i>ovifera</i> <sup>1</sup>              | No      | Cucurbitaceae | E                         | 40 <sup>o</sup> | 2                | A                            | 422                    | 0.4            | 0.9     | 1.7     | 500                        | O                           | <i>Trifolium</i> <sup>c</sup>   | FC:PI                |
| 559h                      | <i>Cucurbita pepo</i> L. cv. Jack-B-Little                          | No      | Cucurbitaceae | E                         | 40              | — <sup>p</sup>   | A                            | 474                    | 0.5            | 1.0     | 1.9     | 564                        | O                           | H <sup>c</sup>                  | FC:PI                |
| 560a                      | <i>Curcuma aeruginosa</i> Roxb.                                     | Yes     | Zingiberaceae | M                         | 63              | 9                | P                            | — <sup>t</sup>         | — <sup>t</sup> | 2.9     | 5.7     | 562                        | O                           | <i>Solan.</i> <sup>e</sup>      | FC:PI                |
| 561a                      | <i>Curcuma amada</i> Roxb.                                          | Yes     | Zingiberaceae | M                         | 42              | 6                | P                            | 910                    | 0.9            | 1.9     | 3.7     | 562                        | O                           | <i>Solan.</i> <sup>e</sup>      | FC:PI                |
| 562a                      | <i>Curcuma angustifolia</i> Roxb.                                   | Yes     | Zingiberaceae | M                         | 42              | 6                | P                            | 1,051                  | 1.1            | 2.2     | 4.3     | 562                        | O                           | <i>Glycine</i> <sup>e</sup>     | FC:PI                |
| 563a                      | <i>Curcuma aromatica</i> Salisb. s.l.                               | Yes     | Zingiberaceae | M                         | 42              | 6                | P                            | 910                    | 0.9            | 1.9     | 3.7     | 562                        | O                           | <i>Solan.</i> <sup>e</sup>      | FC:PI                |
| 564a                      | <i>Curcuma aromatica</i> Salisb. s.l. <sup>h</sup>                  | Yes     | Zingiberaceae | M                         | 63              | 9                | P                            | — <sup>t</sup>         | — <sup>t</sup> | 2.8     | 5.7     | 562                        | O                           | <i>Solan.</i> <sup>e</sup>      | FC:PI                |
| 565a                      | <i>Curcuma aurantiaca</i> Zijp                                      | Yes     | Zingiberaceae | M                         | 42              | 6                | P                            | 1,076                  | 1.1            | 2.2     | 4.4     | 562                        | O                           | <i>Glycine</i> <sup>e</sup>     | FC:PI                |
| 566a                      | <i>Curcuma caesia</i> Roxb.                                         | Yes     | Zingiberaceae | M                         | c. 63           | 9                | P                            | — <sup>t</sup>         | — <sup>t</sup> | 2.8     | 5.6     | 562                        | O                           | <i>Glycine</i> <sup>e</sup>     | FC:PI                |
| 567a                      | <i>Curcuma cannanorensis</i> R. Ansari, V. J. Nair & N. C. Nair     | Yes     | Zingiberaceae | M                         | 42              | 6                | P                            | 1,139                  | 1.2            | 2.3     | 4.7     | 562                        | O                           | <i>Glycine</i> <sup>e</sup>     | FC:PI                |
| 568a                      | <i>Curcuma codonantha</i> Skorničk., M. Sabu & Prasanthk.           | Yes     | Zingiberaceae | M                         | 63              | 9                | P                            | — <sup>t</sup>         | — <sup>t</sup> | 2.8     | 5.7     | 562                        | O                           | <i>Glycine</i> <sup>e</sup>     | FC:PI                |
| 569a                      | <i>Curcuma coriacea</i> Mangaly & M. Sabu                           | Yes     | Zingiberaceae | M                         | 42              | 6                | P                            | 1,271                  | 1.3            | 2.6     | 5.2     | 562                        | O                           | <i>Bellis</i> <sup>e</sup>      | FC:PI                |
| 570a                      | <i>Curcuma decipiens</i> Dalzell                                    | Yes     | Zingiberaceae | M                         | 42              | 6                | P                            | 1,149                  | 1.2            | 2.4     | 4.7     | 562                        | O                           | <i>Glycine</i> <sup>e</sup>     | FC:PI                |
| 571a                      | <i>Curcuma elata</i> Roxb.                                          | Yes     | Zingiberaceae | M                         | 63 <sup>o</sup> | 9                | P                            | — <sup>t</sup>         | — <sup>t</sup> | 2.9     | 5.7     | 562                        | O                           | <i>Solan.</i> <sup>e</sup>      | FC:PI                |
| 572a                      | <i>Curcuma ferruginea</i> Roxb.                                     | Yes     | Zingiberaceae | M                         | 63 <sup>o</sup> | 9                | P                            | — <sup>t</sup>         | — <sup>t</sup> | 2.8     | 5.6     | 562                        | O                           | <i>Glycine</i> <sup>e</sup>     | FC:PI                |
| 573a                      | <i>Curcuma inodora</i> Blatt.                                       | Yes     | Zingiberaceae | M                         | 42              | 6                | P                            | 1,120                  | 1.1            | 2.3     | 4.6     | 562                        | O                           | <i>Glycine</i> <sup>e</sup>     | FC:PI                |

|      |                                                                    |     |                |   |                 |                |                |                |                |      |       |     |   |                             |       |
|------|--------------------------------------------------------------------|-----|----------------|---|-----------------|----------------|----------------|----------------|----------------|------|-------|-----|---|-----------------------------|-------|
| 574a | <i>Curcuma karnatakensis</i><br>Amalraj, Velay. &<br>Mural         | Yes | Zingiberaceae  | M | 42              | 6              | P              | 1,144          | 1.2            | 2.3  | 4.7   | 562 | O | <i>Bellis</i> <sup>e</sup>  | FC:PI |
| 575a | <i>Curcuma kudagensis</i><br>Velay., V.S. Pillai &<br>Amalraj      | Yes | Zingiberaceae  | M | 42              | 6              | P              | 1,120          | 1.1            | 2.3  | 4.6   | 562 | O | <i>Glycine</i> <sup>e</sup> | FC:PI |
| 576a | <i>Curcuma latifolia</i> Roscoe                                    | Yes | Zingiberaceae  | M | 63 <sup>o</sup> | 9              | P              | – <sup>t</sup> | – <sup>t</sup> | 2.8  | 5.6   | 562 | O | <i>Solan.</i> <sup>e</sup>  | FC:PI |
| 577a | <i>Curcuma leucorhiza</i><br>Roxb.                                 | Yes | Zingiberaceae  | M | 63              | 9              | P              | – <sup>t</sup> | – <sup>t</sup> | 2.7  | 5.4   | 562 | O | <i>Solan.</i> <sup>e</sup>  | FC:PI |
| 578a | <i>Curcuma longa</i> L.                                            | Yes | Zingiberaceae  | M | 63              | 9              | P              | – <sup>t</sup> | – <sup>t</sup> | 2.7  | 5.4   | 562 | O | <i>Solan.</i> <sup>e</sup>  | FC:PI |
| 579a | <i>Curcuma mangga</i><br>Valeton & Zijp                            | Yes | Zingiberaceae  | M | 42              | 6              | P              | 895            | 0.9            | 1.8  | 3.7   | 562 | O | <i>Solan.</i> <sup>e</sup>  | FC:PI |
| 580a | <i>Curcuma montana</i> Roxb.                                       | Yes | Zingiberaceae  | M | 42              | 6              | P              | 875            | 0.9            | 1.8  | 3.6   | 562 | O | <i>Solan.</i> <sup>e</sup>  | FC:PI |
| 581a | <i>Curcuma mutabilis</i><br>Škorničk., M.Sabu &<br>Prasanthk.      | Yes | Zingiberaceae  | M | 42              | 6              | P              | 1,218          | 1.2            | 2.5  | 5.0   | 562 | O | <i>Bellis</i> <sup>e</sup>  | FC:PI |
| 582a | <i>Curcuma neilgherrensis</i><br>Wt.                               | Yes | Zingiberaceae  | M | 42              | 6              | P              | 1,120          | 1.1            | 2.3  | 4.6   | 562 | O | <i>Glycine</i> <sup>e</sup> | FC:PI |
| 583a | <i>Curcuma oligantha</i><br>Trimen                                 | Yes | Zingiberaceae  | M | 77              | 11             | P              | – <sup>t</sup> | – <sup>t</sup> | 4.8  | 9.5   | 562 | O | <i>Bellis</i> <sup>e</sup>  | FC:PI |
| 584a | <i>Curcuma prakasha</i><br>S.Tripathi                              | Yes | Zingiberaceae  | M | 42              | 6              | P              | 914            | 0.9            | 1.9  | 3.7   | 562 | O | <i>Solan.</i> <sup>e</sup>  | FC:PI |
| 585a | <i>Curcuma pseudomontana</i><br>J.Graham                           | Yes | Zingiberaceae  | M | 42              | 6              | P              | 1,100          | 1.1            | 2.3  | 4.5   | 562 | O | <i>Glycine</i> <sup>e</sup> | FC:PI |
| 586a | <i>Curcuma raktakanta</i><br>Mangaly & M. Sabu                     | Yes | Zingiberaceae  | M | 105             | 15             | P              | – <sup>t</sup> | – <sup>t</sup> | 4.6  | 9.1   | 562 | O | <i>Solan.</i> <sup>e</sup>  | FC:PI |
| 587a | <i>Curcuma reclinata</i> Roxb.                                     | Yes | Zingiberaceae  | M | 42              | 6              | P              | 1,120          | 1.1            | 2.3  | 4.6   | 562 | O | <i>Glycine</i> <sup>e</sup> | FC:PI |
| 588a | <i>Curcuma roscoeana</i><br>Wall.                                  | Yes | Zingiberaceae  | M | 42              | 6              | P              | 958            | 1.0            | 2.0  | 3.9   | 562 | O | <i>Glycine</i> <sup>e</sup> | FC:PI |
| 589a | <i>Curcuma rubescens</i><br>Roxb.                                  | Yes | Zingiberaceae  | M | c. 42           | 6              | P              | 914            | 0.9            | 1.9  | 3.7   | 562 | O | <i>Solan.</i> <sup>e</sup>  | FC:PI |
| 590a | <i>Curcuma rubrobracteata</i><br>Škorničk., M.Sabu &<br>Prasanthk. | Yes | Zingiberaceae  | M | 42              | 6              | P              | 900            | 0.9            | 1.8  | 3.7   | 562 | O | <i>Solan.</i> <sup>e</sup>  | FC:PI |
| 591a | <i>Curcuma vamana</i><br>M.Sabu & Mangaly                          | Yes | Zingiberaceae  | M | 22              | 2              | P              | 812            | 0.8            | 1.7  | 3.3   | 562 | O | <i>Solan.</i> <sup>e</sup>  | FC:PI |
| 593a | <i>Cuscuta campestris</i><br>Yuncker                               | No  | Convolvulaceae | E | 56 <sup>o</sup> | – <sup>p</sup> | – <sup>q</sup> | 5,296          | 5.4            | 10.8 | 21.7  | 568 | O | – <sup>w</sup>              | FC:PI |
| 594a | <i>Cuscuta cephalanthi</i><br>Engelm.                              | No  | Convolvulaceae | E | 60 <sup>o</sup> | – <sup>p</sup> | – <sup>q</sup> | 3,839          | 3.9            | 7.9  | 15.7  | 568 | O | – <sup>w</sup>              | FC:PI |
| 595a | <i>Cuscuta chilensis</i> <sup>1</sup>                              | No  | Convolvulaceae | E | – <sup>n</sup>  | – <sup>p</sup> | – <sup>q</sup> | 2,802          | 2.9            | 5.7  | 11.5  | 568 | O | – <sup>w</sup>              | FC:PI |
| 595b | <i>Curcuma zanthorrhiza</i><br>Roxb.                               | Yes | Zingiberaceae  | M | 63              | 9              | P              | – <sup>t</sup> | – <sup>t</sup> | 2.9  | 5.8   | 562 | O | <i>Solan.</i> <sup>e</sup>  | FC:PI |
| 596a | <i>Cuscuta compacta</i> Juss.                                      | No  | Convolvulaceae | E | 30 <sup>o</sup> | – <sup>p</sup> | – <sup>q</sup> | 7,672          | 7.8            | 15.7 | 31.4  | 568 | O | – <sup>w</sup>              | FC:PI |
| 597a | <i>Cuscuta epilinum</i> Weihe                                      | No  | Convolvulaceae | E | 42 <sup>o</sup> | – <sup>p</sup> | – <sup>q</sup> | 3,785          | 3.9            | 7.7  | 15.5  | 568 | O | – <sup>w</sup>              | FC:PI |
| 598a | <i>Cuscuta europaea</i> L.                                         | No  | Convolvulaceae | E | 14 <sup>o</sup> | – <sup>p</sup> | – <sup>q</sup> | 1,051          | 1.1            | 2.2  | 4.3   | 568 | O | – <sup>w</sup>              | FC:PI |
| 599a | <i>Cuscuta exaltata</i> Engelm.                                    | No  | Convolvulaceae | E | – <sup>n</sup>  | – <sup>p</sup> | – <sup>q</sup> | 20,470         | 20.9           | 41.9 | 83.7  | 568 | O | – <sup>w</sup>              | FC:PI |
| 600a | <i>Cuscuta gronovii</i><br>Willdenow <sup>h</sup>                  | No  | Convolvulaceae | E | 60 <sup>o</sup> | – <sup>p</sup> | – <sup>q</sup> | 2,137          | 2.2            | 4.4  | 8.7   | 568 | O | – <sup>w</sup>              | FC:PI |
| 600b | <i>Cuscuta gronovii</i><br>Willdenow <sup>h</sup>                  | No  | Convolvulaceae | E | 60 <sup>o</sup> | – <sup>p</sup> | – <sup>q</sup> | 6,753          | 6.9            | 13.8 | 27.6  | 568 | O | – <sup>w</sup>              | FC:PI |
| 600c | <i>Cuscuta gronovii</i><br>Willdenow var.<br><i>calyprata</i>      | No  | Convolvulaceae | E | 60 <sup>o</sup> | – <sup>p</sup> | – <sup>q</sup> | 5,609          | 5.7            | 11.5 | 22.9  | 568 | O | – <sup>w</sup>              | FC:PI |
| 601a | <i>Cuscuta indecora</i> Choisy                                     | No  | Convolvulaceae | E | 30 <sup>o</sup> | – <sup>p</sup> | – <sup>q</sup> | 32,049         | 32.8           | 65.5 | 131.1 | 568 | O | – <sup>w</sup>              | FC:PI |
| 602a | <i>Cuscuta lupuliformis</i><br>Weihe                               | No  | Convolvulaceae | E | 28 <sup>o</sup> | – <sup>p</sup> | – <sup>q</sup> | 21,971         | 22.5           | 44.9 | 89.9  | 568 | O | – <sup>w</sup>              | FC:PI |

Continued

| Entry number <sup>e</sup> | Species                                                                          | Voucher        | Family                  | Higher group <sup>#</sup> | 2n <sup>‡</sup>                   | Ploidy level (x) | Life cycle type <sup>§</sup> | DNA amount             |         |         |         | Original ref. <sup>a</sup> | Present amount <sup>†</sup> | Standard species <sup>*b1</sup> | Method <sup>††</sup> |
|---------------------------|----------------------------------------------------------------------------------|----------------|-------------------------|---------------------------|-----------------------------------|------------------|------------------------------|------------------------|---------|---------|---------|----------------------------|-----------------------------|---------------------------------|----------------------|
|                           |                                                                                  |                |                         |                           |                                   |                  |                              | 1C (Mbp <sup>b</sup> ) | 1C (pg) | 2C (pg) | 4C (pg) |                            |                             |                                 |                      |
| 603a                      | <i>Cuscuta obtusiflora</i> Kunth                                                 | No             | Convolvulaceae          | E                         | – <sup>n</sup>                    | – <sup>p</sup>   | – <sup>q</sup>               | 773                    | 0.8     | 1.6     | 3.2     | 568                        | O                           | – <sup>w</sup>                  | FC:PI                |
| 604a                      | <i>Cuscuta pentagona</i> Engel.                                                  | No             | Convolvulaceae          | E                         | 44 <sup>o</sup> r 56 <sup>o</sup> | – <sup>p</sup>   | – <sup>q</sup>               | 567                    | 0.6     | 1.2     | 2.3     | 568                        | O                           | – <sup>w</sup>                  | FC:PI                |
| 605a                      | <i>Cuscuta polygonorum</i> Engel.                                                | No             | Convolvulaceae          | E                         | – <sup>n</sup>                    | – <sup>p</sup>   | – <sup>q</sup>               | 792                    | 0.8     | 1.6     | 3.2     | 568                        | O                           | – <sup>w</sup>                  | FC:PI                |
| 606a                      | <i>Cuscuta rostrata</i> Shuttlw. ex Engelm. & A.Gray                             | No             | Convolvulaceae          | E                         | – <sup>n</sup>                    | – <sup>p</sup>   | – <sup>q</sup>               | 3,971                  | 4.1     | 8.1     | 16.2    | 568                        | O                           | – <sup>w</sup>                  | FC:PI                |
| 607a                      | <i>Cuscuta veitchii</i> Brandegee                                                | No             | Convolvulaceae          | E                         | – <sup>n</sup>                    | – <sup>p</sup>   | – <sup>q</sup>               | 2,851                  | 2.9     | 5.8     | 11.7    | 568                        | O                           | – <sup>w</sup>                  | FC:PI                |
| 608a                      | <i>Cyanus achtarovii</i> (Urumov) Holub                                          | Yes            | Asteraceae <sup>j</sup> | E                         | 22                                | 2                | P                            | 1,526                  | 1.6     | 3.1     | 6.2     | 529                        | O                           | G <sup>c</sup>                  | CIA                  |
| 609a                      | <i>Cyanus napuliferus</i> (Rochel) Sojak                                         | Yes            | Asteraceae <sup>j</sup> | E                         | 20                                | 2                | P                            | 1,213                  | 1.2     | 2.5     | 5.0     | 529                        | O                           | G <sup>c</sup>                  | CIA                  |
| 610a                      | <i>Cyanus pichleri</i> (Boiss.) Holub                                            | Yes            | Asteraceae <sup>j</sup> | E                         | 44                                | 4                | P                            | 1,927                  | 2.0     | 3.9     | 7.9     | 529                        | O                           | G <sup>c</sup>                  | CIA                  |
| 611a                      | <i>Cyanus segetum</i> Hill                                                       | Yes            | Asteraceae <sup>j</sup> | E                         | 24                                | 2                | A                            | 719                    | 0.7     | 1.5     | 2.9     | 529                        | O                           | G <sup>c</sup>                  | CIA                  |
| 612a                      | <i>Cyanus thirkei</i> (Schultz Bip.) Holub                                       | Yes            | Asteraceae <sup>j</sup> | E                         | 20 + 1B                           | 2                | P                            | 1,066                  | 1.1     | 2.2     | 4.4     | 529                        | O                           | G <sup>c</sup>                  | CIA                  |
| 613a                      | <i>Cyanus triumfettii</i> (Bartl.) Dostal subsp. <i>adscendens</i>               | Yes            | Asteraceae <sup>j</sup> | E                         | 22                                | 2                | P                            | 1,369                  | 1.4     | 2.8     | 5.6     | 529                        | O                           | G <sup>c</sup>                  | CIA                  |
| 613b                      | <i>Cyanus triumfettii</i> (All.) Dostal ex Love & Love subsp. <i>triumfettii</i> | Yes            | Asteraceae <sup>j</sup> | E                         | 22                                | 2                | P                            | 1,477                  | 1.5     | 3.0     | 6.0     | 529                        | O                           | G <sup>c</sup>                  | CIA                  |
| 614a                      | <i>Cyanus tuberosus</i> (Vis.) Sojak                                             | Yes            | Asteraceae <sup>j</sup> | E                         | 20                                | 2                | P                            | 1,232                  | 1.3     | 2.5     | 5.0     | 529                        | O                           | G <sup>c</sup>                  | CIA                  |
| 615a                      | <i>Cyclamen persicum</i> Mill var. Purple Flamed                                 | – <sup>m</sup> | Primulaceae             | E                         | 48                                | 2                | P                            | 1,550                  | 1.6     | 3.2     | 6.3     | 498                        | O                           | <i>Solan.</i>                   | FC:PI                |
| 616b                      | <i>Cydonia oblonga</i> Mill.                                                     | Yes            | Rosaceae                | E                         | – <sup>n</sup>                    | 2 <sup>z</sup>   | P                            | 753                    | 0.8     | 1.5     | 3.1     | 527                        | O                           | G <sup>c</sup>                  | FC:PI                |
| 616c                      | <i>Cydonia oblonga</i> Mill.                                                     | No             | Rosaceae                | E                         | – <sup>n</sup>                    | – <sup>p</sup>   | P                            | 968                    | 1.0     | 2.0     | 4.0     | 492                        | O                           | <i>Glycine</i> <sup>e</sup>     | FC:PI                |
| 617a                      | <i>Cymodocea nodosa</i> (Ucria) Asch.                                            | Yes            | Cymodoceaceae           | M                         | 28                                | 4                | P                            | 528                    | 0.5     | 1.1     | 2.2     | 479                        | O                           | G <sup>c</sup>                  | CIA                  |
| 617b                      | <i>Cymodocea nodosa</i> (Ucria) Asch.                                            | Yes            | Cymodoceaceae           | M                         | 28                                | 4                | P                            | 313                    | 0.3     | 0.6     | 1.3     | 479                        | O                           | <i>Trifolium</i> <sup>e</sup>   | FC:PI                |
| 618a                      | <i>Cynosurus cristatus</i> L.                                                    | –              | Poaceae <sup>j</sup>    | M                         | 14 <sup>o</sup>                   | 2                | P                            | 2,980                  | 3.0     | 6.1     | 12.2    | 555                        | O                           | G <sup>c</sup>                  | FC:PI                |
| 619a                      | <i>Cyrtochiloides cardiochila</i> (Lindl.) N.H.Williams & M.W.Chase              | Yes            | Orchidaceae             | M                         | – <sup>n</sup>                    | – <sup>p</sup>   | P                            | 3,032                  | 3.1     | 6.2     | 12.4    | 504 <sup>ah</sup>          | O                           | F                               | Fe                   |
| 620a                      | <i>Cyrtochilum serratum</i> (Lindl.) Kränzl.                                     | Yes            | Orchidaceae             | M                         | – <sup>n</sup>                    | – <sup>p</sup>   | P                            | 2,641                  | 2.7     | 5.4     | 10.8    | 504 <sup>ah</sup>          | O                           | – <sup>w</sup>                  | FC:DAPI              |
| 621a                      | <i>Cytisus commutatus</i> (Willk.) Briq.                                         | Yes            | Fabaceae <sup>j</sup>   | E                         | – <sup>n</sup>                    | – <sup>p</sup>   | P                            | 1,897                  | 1.9     | 3.9     | 7.8     | 489                        | O                           | – <sup>w</sup>                  | FC:EB                |
| 622c                      | <i>Cytisus scoparius</i> subsp. <i>scoparius</i> (L.) Link                       | Yes            | Fabaceae <sup>j</sup>   | E                         | – <sup>n</sup>                    | – <sup>p</sup>   | P                            | 963                    | 1.0     | 2.0     | 3.9     | 489                        | O                           | – <sup>w</sup>                  | FC:EB                |
| 623a                      | <i>Cytisus striatus</i> (Hill) Rothm.                                            | Yes            | Fabaceae <sup>j</sup>   | E                         | – <sup>n</sup>                    | – <sup>p</sup>   | P                            | 944                    | 1.0     | 1.9     | 3.9     | 489                        | O                           | – <sup>w</sup>                  | FC:EB                |
| 624h                      | <i>Dactylis glomerata</i> L. subsp. <i>glomerata</i>                             | Yes            | Poaceae <sup>j</sup>    | M                         | 28                                | 4                | P                            | 4,196                  | 4.3     | 8.6     | 17.2    | 497 <sup>af</sup>          | O                           | F <sup>c</sup>                  | CIA                  |

|      |                                                                                                    |                  |                           |   |                |                 |                |       |      |      |      |                   |   |                             |       |
|------|----------------------------------------------------------------------------------------------------|------------------|---------------------------|---|----------------|-----------------|----------------|-------|------|------|------|-------------------|---|-----------------------------|-------|
| 624i | <i>Dactylis glomerata</i> L.                                                                       | –                | Poaceae <sup>j</sup>      | M | 28°            | 4               | P              | 4,422 | 4.5  | 9.0  | 18.1 | 555               | O | G <sup>c</sup>              | FC:PI |
| 625a | <i>Dactylis polygama</i> Horv.                                                                     | –                | Poaceae <sup>j</sup>      | M | 14°            | 2               | P              | 2,213 | 2.3  | 4.5  | 9.1  | 555               | O | G <sup>c</sup>              | FC:PI |
| 626a | <i>Dactylis smithii</i><br>Linksubsp. <i>smithii</i>                                               | – <sup>m</sup>   | Poaceae <sup>j</sup>      | M | 14°            | 2               | P              | 2,127 | 2.2  | 4.4  | 8.7  | 477               | O | H <sup>c</sup>              | FC:PI |
| 627a | <i>Dactylorhiza fuchsii</i><br>(Druce) Soó                                                         | No               | Orchidaceae               | M | 40             | 2               | P              | 2,826 | 2.9  | 5.8  | 11.6 | 517               | O | G <sup>c</sup>              | CIA   |
| 628a | <i>Dactylorhiza incarnata</i><br>(L.) Soó subsp.<br><i>cruenta</i>                                 | No               | Orchidaceae               | M | 40             | 2               | P              | 3,467 | 3.5  | 7.1  | 14.2 | 517               | O | G <sup>c</sup>              | CIA   |
| 629a | <i>Dactylorhiza lapponica</i><br>(Læst. ex Hartman)<br>Soó                                         | No               | Orchidaceae               | M | 80             | 4               | P              | 6,538 | 6.7  | 13.4 | 26.7 | 517               | O | G <sup>c</sup>              | CIA   |
| 630a | <i>Dactylorhiza maculata</i><br>(L.) Soó                                                           | No               | Orchidaceae               | M | 80             | 4               | P              | 5,535 | 5.7  | 11.3 | 22.6 | 517               | O | G <sup>c</sup>              | CIA   |
| 631a | <i>Dahlia apiculata</i> (Sherff)<br>P.D.Sørensen                                                   | Yes              | Asteraceae <sup>j</sup>   | E | 32             | 4 <sup>at</sup> | P              | 2,020 | 2.1  | 4.1  | 8.3  | 597               | O | G <sup>c</sup>              | CIA   |
| 632a | <i>Dahlia australis</i><br>P.D.Sørensen                                                            | Yes              | Asteraceae <sup>j</sup>   | E | 32             | 4 <sup>at</sup> | P              | 1,946 | 2.0  | 4.0  | 8.0  | 597               | O | G <sup>c</sup>              | CIA   |
| 633a | <i>Dahlia coccinea</i> Cav. <sup>i</sup>                                                           | Yes              | Asteraceae <sup>j</sup>   | E | 32             | 4 <sup>at</sup> | P              | 2,117 | 2.2  | 4.3  | 8.7  | 597               | O | G <sup>c</sup>              | CIA   |
| 633b | <i>Dahlia coccinea</i> Cav. <sup>i</sup>                                                           | Yes              | Asteraceae <sup>j</sup>   | E | 32             | 4 <sup>at</sup> | P              | 2,416 | 2.5  | 4.9  | 9.9  | 597               | O | G <sup>c</sup>              | CIA   |
| 634a | <i>Dahlia coccinea</i> Cav. <sup>i</sup>                                                           | Yes              | Asteraceae <sup>j</sup>   | E | 64             | 8 <sup>at</sup> | P              | 3,946 | 4.0  | 8.1  | 16.1 | 597               | O | G <sup>c</sup>              | CIA   |
| 634b | <i>Dahlia coccinea</i> Cav. <sup>i</sup>                                                           | Yes              | Asteraceae <sup>j</sup>   | E | 64             | 8 <sup>at</sup> | P              | 4,401 | 4.5  | 9.0  | 18.0 | 597               | O | G <sup>c</sup>              | CIA   |
| 635a | <i>Dahlia dissecta</i><br>S.Watson <sup>i</sup>                                                    | Yes              | Asteraceae <sup>j</sup>   | E | 34             | 4 <sup>at</sup> | P              | 1,619 | 1.7  | 3.3  | 6.6  | 597               | O | G <sup>c</sup>              | CIA   |
| 636a | <i>Dahlia imperialis</i> Rozel <sup>i</sup>                                                        | Yes              | Asteraceae <sup>j</sup>   | E | 32             | 4 <sup>at</sup> | P              | 2,347 | 2.4  | 4.8  | 9.6  | 597               | O | G <sup>c</sup>              | CIA   |
| 637a | <i>Dahlia merckii</i> Lehman                                                                       | Yes              | Asteraceae <sup>j</sup>   | E | 36             | 4 <sup>at</sup> | P              | 1,966 | 2.0  | 4.0  | 8.0  | 597               | O | G <sup>c</sup>              | CIA   |
| 638a | <i>Dahlia rudis</i><br>P.D.Sørensen                                                                | Yes              | Asteraceae <sup>j</sup>   | E | 32             | 4 <sup>at</sup> | P              | 1,712 | 1.8  | 3.5  | 7.0  | 597               | O | G <sup>c</sup>              | CIA   |
| 639a | <i>Dahlia scapigeroides</i><br>Sherff <sup>i</sup>                                                 | Yes              | Asteraceae <sup>j</sup>   | E | 34             | 4 <sup>at</sup> | P              | 2,054 | 2.1  | 4.2  | 8.4  | 597               | O | G <sup>c</sup>              | CIA   |
| 640a | <i>Dahlia sorensenii</i> Hanson<br>& Hjerting <sup>i</sup>                                         | Yes              | Asteraceae <sup>j</sup>   | E | 64             | 8 <sup>at</sup> | P              | 4,303 | 4.4  | 8.8  | 17.6 | 597               | O | G <sup>c</sup>              | CIA   |
| 641a | <i>Dahlia tenuicaulis</i><br>P.D.Sørensen                                                          | Yes              | Asteraceae <sup>j</sup>   | E | 32             | 4 <sup>at</sup> | P              | 2,064 | 2.1  | 4.2  | 8.4  | 597               | O | G <sup>c</sup>              | CIA   |
| 642a | <i>Dahlia variabilis</i> cv.<br>Roquencourt <sup>i</sup>                                           | Yes              | Asteraceae <sup>j</sup>   | E | 64             | 8 <sup>at</sup> | P              | 2,020 | 2.1  | 4.1  | 8.3  | 597               | O | E <sup>c</sup>              | FC:PI |
| 642b | <i>Dahlia variabilis</i> cv.<br>Helena <sup>i</sup>                                                | Yes              | Asteraceae <sup>j</sup>   | E | 64             | 8 <sup>at</sup> | P              | 2,029 | 2.1  | 4.2  | 8.3  | 597               | O | E <sup>c</sup>              | FC:PI |
| 643c | <i>Dalbergia sissoo</i> Roxb.<br>ex DC.                                                            | No               | Fabaceae <sup>j</sup>     | E | 20°            | 2               | P              | 689   | 0.7  | 1.4  | 2.8  | 501 <sup>ag</sup> | O | B <sup>c</sup>              | Fe    |
| 644a | <i>Daphniphyllum</i><br><i>pentandrum</i> Hayata<br>var. <i>oldhamii</i>                           | Yes              | Daphniphyllaceae          | E | – <sup>n</sup> | – <sup>p</sup>  | P              | 1,225 | 1.3  | 2.5  | 5.0  | 612               | O | <i>Solan.</i> <sup>c</sup>  | FC:PI |
| 645a | <i>Dasyllirion cedrosanum</i><br>Trel.                                                             | Yes              | Asparagaceae              | M | – <sup>n</sup> | – <sup>p</sup>  | P              | 5,681 | 5.8  | 11.6 | 23.2 | 592               | O | G                           | FC:PI |
| 646f | <i>Dasypyrum villosum</i><br>(= <i>Haynaldia villosa</i> )<br>(L.) Coss. & Durie<br>ex P. Candargy | No <sup>m1</sup> | Poaceae <sup>j</sup>      | M | 14             | 2               | P              | 5,399 | 5.5  | 11.0 | 22.1 | 605               | O | F-2118p                     | FC:PI |
| 647a | <i>Datisca cannabina</i> L.                                                                        | Yes              | Datisceae                 | E | 22°            | – <sup>p</sup>  | P              | 1,122 | 1.1  | 2.3  | 4.6  | 612               | O | <i>Solan.</i> <sup>c</sup>  | FC:PI |
| 648a | <i>Degenia velebitica</i><br>(Degen) Hayek                                                         | Yes              | Brassicaceae <sup>j</sup> | E | 16             | 2               | – <sup>q</sup> | 1,242 | 1.3  | 2.5  | 5.1  | 599               | O | L                           | FC:PI |
| 649a | <i>Dendranthema arcticum</i><br>Tzvelev subsp.<br><i>maekawanum</i> (Kitam.)<br>H.Koyama           | Yes              | Asteraceae <sup>j</sup>   | E | 72             | 8               | P              | 9,795 | 10.0 | 20.0 | 40.1 | 521               | O | <i>Petunia</i> <sup>c</sup> | FC:PI |

| Entry number <sup>g</sup> | Species                                                                | Voucher        | Family                    | Higher group <sup>#</sup> | 2n <sup>‡</sup> | Ploidy level (x) | Life cycle type <sup>§</sup> | DNA amount             |         |         |         | Original ref. <sup>a</sup> | Present amount <sup>†</sup> | Standard species <sup>*b1</sup> | Method <sup>††</sup> |
|---------------------------|------------------------------------------------------------------------|----------------|---------------------------|---------------------------|-----------------|------------------|------------------------------|------------------------|---------|---------|---------|----------------------------|-----------------------------|---------------------------------|----------------------|
|                           |                                                                        |                |                           |                           |                 |                  |                              | 1C (Mbp <sup>s</sup> ) | 1C (pg) | 2C (pg) | 4C (pg) |                            |                             |                                 |                      |
| 650a                      | <i>Dendranthema indica</i> Des Moul. var. <i>coreanum</i> Levl. & Van. | Yes            | Asteraceae <sup>j</sup>   | E                         | 36              | 4                | P                            | 5,936                  | 6.1     | 12.1    | 24.3    | 521                        | O                           | G <sup>c</sup>                  | FC:PI                |
| 651a                      | <i>Dendranthema maximowiczii</i> (Komarov) Tzvelev                     | Yes            | Asteraceae <sup>j</sup>   | E                         | 54              | 6                | P                            | 7,716                  | 7.9     | 15.8    | 31.6    | 521                        | O                           | G <sup>c</sup>                  | FC:PI                |
| 652a                      | <i>Dendranthema zawadskii</i> (Herbich) Tzvelev                        | Yes            | Asteraceae <sup>j</sup>   | E                         | 72              | 8                | P                            | 10,377                 | 10.6    | 21.2    | 42.4    | 521                        | O                           | G <sup>c</sup>                  | FC:PI                |
| 653a                      | <i>Deschampsia caespitosa</i> (L.) P.Beauv.                            | Yes            | Poaceae <sup>j</sup>      | M                         | 26 <sup>o</sup> | 2                | P                            | 5,100                  | 5.2     | 10.4    | 20.9    | 528                        | O                           | – <sup>w</sup>                  | FC:PI                |
| 654a                      | <i>Deschampsia chapmanii</i> Petrie                                    | Yes            | Poaceae <sup>j</sup>      | M                         | 26              | 2                | P                            | 5,403                  | 5.5     | 11.1    | 22.1    | 528                        | O                           | – <sup>w</sup>                  | FC:PI                |
| 655a                      | <i>Deschampsia tenella</i> Petrie                                      | Yes            | Poaceae <sup>j</sup>      | M                         | 26              | 2                | P                            | 4,924                  | 5.0     | 10.1    | 20.1    | 528                        | O                           | – <sup>w</sup>                  | FC:PI                |
| 656a                      | <i>Descurainia bourgeauana</i> (Fourn.) O.E.Schulz                     | Yes            | Brassicaceae <sup>j</sup> | E                         | 14              | 2                | P                            | 196                    | 0.2     | 0.4     | 0.8     | 599                        | O                           | L                               | FC:PI                |
| 656b                      | <i>Descurainia bourgeauana</i> (Fourn.) O.E.Schulz                     | – <sup>m</sup> | Brassicaceae <sup>j</sup> | E                         | 14              | 2                | P                            | 186                    | 0.2     | 0.4     | 0.8     | 477                        | O                           | <i>Raphanus</i> <sup>c</sup>    | FC:PI                |
| 657a                      | <i>Descurainia gilva</i> Svent.                                        | Yes            | Brassicaceae <sup>j</sup> | E                         | 14              | 2                | P                            | 215                    | 0.2     | 0.4     | 0.9     | 599                        | O                           | L                               | FC:PI                |
| 657b                      | <i>Descurainia gilva</i> Svent.                                        | – <sup>m</sup> | Brassicaceae <sup>j</sup> | E                         | 14              | 2                | P                            | 220                    | 0.2     | 0.5     | 0.9     | 477                        | O                           | <i>Raphanus</i> <sup>c</sup>    | FC:PI                |
| 658a                      | <i>Descurainia gonzalesii</i> Svent.                                   | – <sup>m</sup> | Brassicaceae <sup>j</sup> | E                         | 14              | 2                | P                            | 225                    | 0.2     | 0.5     | 0.9     | 477                        | O                           | <i>Raphanus</i> <sup>c</sup>    | FC:PI                |
| 659a                      | <i>Descurainia lemsii</i> Bramw.                                       | – <sup>m</sup> | Brassicaceae <sup>j</sup> | E                         | 14 <sup>o</sup> | 2                | P                            | 220                    | 0.2     | 0.5     | 0.9     | 477                        | O                           | <i>Raphanus</i> <sup>c</sup>    | FC:PI                |
| 660a                      | <i>Descurainia millefolia</i> (Jacq.) Webb & Berth.                    | – <sup>m</sup> | Brassicaceae <sup>j</sup> | E                         | 14              | 2                | P                            | 215                    | 0.2     | 0.4     | 0.9     | 477                        | O                           | <i>Raphanus</i> <sup>c</sup>    | FC:PI                |
| 661a                      | <i>Desideria linearis</i> (N.Busch) Al-Shehbaz                         | Yes            | Brassicaceae <sup>j</sup> | E                         | 14              | 2                | – <sup>q</sup>               | 1,350                  | 1.4     | 2.8     | 5.5     | 599                        | O                           | L                               | FC:PI                |
| 662a                      | <i>Deuterocohnia longipetala</i> (Baker) Mez                           | Yes            | Bromeliaceae              | M                         | – <sup>n</sup>  | – <sup>p</sup>   | P                            | 362                    | 0.4     | 0.7     | 1.5     | 575                        | O                           | <i>Raphanus</i> <sup>c</sup>    | FC:PI                |
| 663a                      | <i>Deuterocohnia schreiteri</i> A.Cast.                                | Yes            | Bromeliaceae              | M                         | – <sup>n</sup>  | – <sup>p</sup>   | P                            | 391                    | 0.4     | 0.8     | 1.6     | 575                        | O                           | <i>Raphanus</i> <sup>c</sup>    | FC:PI                |
| 664a                      | <i>Deyeuxia</i> aff. <i>quadriseta</i> <sup>1</sup>                    | Yes            | Poaceae <sup>j</sup>      | M                         | 56              | 8                | P                            | 6,455                  | 6.6     | 13.2    | 26.4    | 528                        | O                           | – <sup>w</sup>                  | FC:PI                |
| 665a                      | <i>Deyeuxia aucklandica</i> (Hook.f.) Zotov                            | Yes            | Poaceae <sup>j</sup>      | M                         | 42              | 6                | P                            | 5,428                  | 5.6     | 11.1    | 22.2    | 476                        | O                           | <i>Actinidia</i> <sup>c</sup>   | FC:PI                |
| 666a                      | <i>Deyeuxia aucklandica</i> (Hook.f.) Zotov <sup>1</sup>               | Yes            | Poaceae <sup>j</sup>      | M                         | 56              | 8                | P                            | 6,875                  | 7.0     | 14.1    | 28.1    | 528                        | O                           | – <sup>w</sup>                  | FC:PI                |
| 667a                      | <i>Deyeuxia avenoides</i> (Hook.f.) Buchanan <sup>i</sup>              | Yes            | Poaceae <sup>j</sup>      | M                         | 70              | 10               | P                            | 6,616                  | 6.8     | 13.5    | 27.1    | 528                        | O                           | – <sup>w</sup>                  | FC:PI                |
| 667b                      | <i>Deyeuxia avenoides</i> (Hook.f.) Buchanan <sup>i</sup>              | Yes            | Poaceae <sup>j</sup>      | M                         | 70              | 10               | P                            | 7,589                  | 7.8     | 15.5    | 31.0    | 528                        | O                           | – <sup>w</sup>                  | FC:PI                |
| 667c                      | <i>Deyeuxia avenoides</i> (Hook.f.) Buchanan                           | Yes            | Poaceae <sup>j</sup>      | M                         | 70              | 10               | P                            | 5,281                  | 5.4     | 10.8    | 21.6    | 476                        | O                           | <i>Actinidia</i> <sup>c</sup>   | FC:PI                |
| 668a                      | <i>Deyeuxia lacustris</i> Edgar & Connor                               | Yes            | Poaceae <sup>j</sup>      | M                         | 28              | 4                | P                            | 7,888                  | 8.1     | 16.1    | 32.3    | 528                        | O                           | – <sup>w</sup>                  | FC:PI                |

|      |                                                                 |                |                           |   |                 |                |                |       |     |      |      |                   |   |                               |       |
|------|-----------------------------------------------------------------|----------------|---------------------------|---|-----------------|----------------|----------------|-------|-----|------|------|-------------------|---|-------------------------------|-------|
| 669a | <i>Deyeuxia quadriseta</i> (Labill.) Benth                      | Yes            | Poaceae <sup>j</sup>      | M | 56              | 8              | P              | 7,511 | 7.7 | 15.4 | 30.7 | 528               | O | – <sup>w</sup>                | FC:PI |
| 669b | <i>Deyeuxia quadriseta</i> (Labill.) Benth. <sup>i</sup>        | Yes            | Poaceae <sup>j</sup>      | M | 56              | 8              | P              | 4,499 | 4.6 | 9.2  | 18.4 | 476               | O | <i>Actinidia</i> <sup>c</sup> | FC:PI |
| 670a | <i>Deyeuxia youngii</i> (Hook.f.) Buchanan                      | Yes            | Poaceae <sup>j</sup>      | M | 28              | 4              | P              | 4,826 | 4.9 | 9.9  | 19.7 | 528               | O | – <sup>w</sup>                | FC:PI |
| 671a | <i>Dichelachne crinita</i> (L.f.) Hook.f.                       | Yes            | Poaceae <sup>j</sup>      | M | 70              | 10             | P              | 8,000 | 8.2 | 16.4 | 32.7 | 528               | O | – <sup>w</sup>                | FC:PI |
| 672a | <i>Dichelachne inaequiglumis</i> (Hack.) Edgar & Connor         | Yes            | Poaceae <sup>j</sup>      | M | 70              | 10             | P              | 8,020 | 8.2 | 16.4 | 32.8 | 528               | O | – <sup>w</sup>                | FC:PI |
| 673a | <i>Dichelachne lautumia</i> Edgar & Connor                      | Yes            | Poaceae <sup>j</sup>      | M | 70              | 10             | P              | 8,641 | 8.8 | 17.7 | 35.3 | 528               | O | – <sup>w</sup>                | FC:PI |
| 674a | <i>Dichelachne micrantha</i> (Cav.) Domin.                      | Yes            | Poaceae <sup>j</sup>      | M | 70              | 10             | P              | 8,240 | 8.4 | 16.9 | 33.7 | 528               | O | – <sup>w</sup>                | FC:PI |
| 675a | <i>Dicheranthus plocamoides</i> Webb                            | – <sup>m</sup> | Caryophyllaceae           | E | 16 <sup>o</sup> | 2              | P              | 729   | 0.7 | 1.5  | 3.0  | 477               | O | <i>Solan.</i> <sup>c</sup>    | FC:PI |
| 676a | <i>Digitaria ciliaris</i> (Retz.) Koeler                        | Yes            | Poaceae <sup>j</sup>      | M | – <sup>n</sup>  | – <sup>p</sup> | A              | 1,260 | 1.3 | 2.6  | 5.2  | 556               | O | <i>Raphanus</i> <sup>c</sup>  | FC:PI |
| 677a | <i>Digitaria coenicola</i> (F.Muell.) Hughes                    | – <sup>m</sup> | Poaceae <sup>j</sup>      | M | – <sup>n</sup>  | – <sup>p</sup> | P              | 601   | 0.6 | 1.2  | 2.5  | 526               | O | A                             | FC:PI |
| 678a | <i>Digitaria exilis</i> (Kipp.) Stapf                           | Yes            | Poaceae <sup>j</sup>      | M | 36              | 4              | A              | 956   | 1.0 | 2.0  | 3.9  | 556               | O | <i>Glycine</i> <sup>e</sup>   | FC:PI |
| 679a | <i>Digitaria iburua</i> Stapf                                   | Yes            | Poaceae <sup>j</sup>      | M | – <sup>n</sup>  | – <sup>p</sup> | A              | 904   | 0.9 | 1.8  | 3.7  | 556               | O | <i>Glycine</i> <sup>e</sup>   | FC:PI |
| 680a | <i>Digitaria lecardii</i> (Pilg.) Stapf <sup>f</sup>            | Yes            | Poaceae <sup>j</sup>      | M | – <sup>n</sup>  | – <sup>p</sup> | A              | 1,301 | 1.3 | 2.7  | 5.3  | 556               | O | <i>Raphanus</i> <sup>c</sup>  | FC:PI |
| 681a | <i>Digitaria longiflora</i> (Retz.) Persoon                     | Yes            | Poaceae <sup>j</sup>      | M | – <sup>n</sup>  | – <sup>p</sup> | AP             | 914   | 0.9 | 1.9  | 3.7  | 556               | O | <i>Glycine</i> <sup>e</sup>   | FC:PI |
| 682a | <i>Digitaria ternata</i> (A. Rich) Stapf                        | Yes            | Poaceae <sup>j</sup>      | M | – <sup>n</sup>  | – <sup>p</sup> | A              | 868   | 0.9 | 1.8  | 3.6  | 556               | O | <i>Glycine</i> <sup>e</sup>   | FC:PI |
| 683a | <i>Dillenia indica</i> L.                                       | No             | Dilleniaceae              | E | c. 52           | – <sup>p</sup> | P              | 501   | 0.5 | 1.0  | 2.1  | 612               | O | J                             | Fe    |
| 684e | <i>Dioscorea alata</i> L. <sup>i</sup>                          | Yes            | Dioscoreaceae             | M | 40              | 4              | P              | 489   | 0.5 | 1.0  | 2.0  | 538               | O | G <sup>c</sup>                | FC:EB |
| 684f | <i>Dioscorea alata</i> L. <sup>i</sup>                          | Yes            | Dioscoreaceae             | M | 40              | 4              | P              | 616   | 0.6 | 1.3  | 2.5  | 538               | O | G <sup>c</sup>                | FC:EB |
| 685a | <i>Dioscorea alata</i> L.                                       | Yes            | Dioscoreaceae             | M | 80              | 8              | P              | 1,037 | 1.1 | 2.1  | 4.2  | 538               | O | G <sup>c</sup>                | FC:EB |
| 686a | <i>Diospyros exculpatata</i> Buch.-Ham.                         | No             | Ebenaceae                 | E | – <sup>n</sup>  | – <sup>p</sup> | P              | 2,814 | 2.9 | 5.8  | 11.5 | 501 <sup>ag</sup> | O | B <sup>c</sup>                | Fe    |
| 687a | <i>Diospyros kaki</i> <sup>1</sup>                              | No             | Ebenaceae                 | E | – <sup>n</sup>  | – <sup>p</sup> | P              | 2,484 | 2.5 | 5.1  | 10.2 | 563               | O | G <sup>c</sup>                | FC:PI |
| 688a | <i>Diplotaxis catholica</i> (L.) DC.                            | No             | Brassicaceae <sup>j</sup> | E | 18              | 2              | A              | 590   | 0.6 | 1.2  | 2.4  | 602               | O | <i>Solan.</i> <sup>c</sup>    | FC:PI |
| 689a | <i>Diplotaxis erucoides</i> (L.) DC.                            | Yes            | Brassicaceae <sup>j</sup> | E | 14              | 2              | A              | 499   | 0.5 | 1.0  | 2.0  | 599               | O | L                             | FC:PI |
| 690a | <i>Diplotaxis sifolia</i> Kunze                                 | Yes            | Brassicaceae <sup>j</sup> | E | 20              | – <sup>p</sup> | – <sup>q</sup> | 548   | 0.6 | 1.1  | 2.2  | 599               | O | L                             | FC:PI |
| 691a | <i>Dodonaea triquetra</i> <sup>1</sup>                          | – <sup>m</sup> | Sapindaceae               | E | – <sup>n</sup>  | – <sup>p</sup> | P              | 680   | 0.7 | 1.4  | 2.8  | 526               | O | A                             | FC:PI |
| 692a | <i>Dodonaea viscosa</i> subsp. <i>angustissima</i> <sup>1</sup> | – <sup>m</sup> | Sapindaceae               | E | – <sup>n</sup>  | – <sup>p</sup> | P              | 616   | 0.6 | 1.3  | 2.5  | 526               | O | A                             | FC:PI |
| 692b | <i>Dodonaea viscosa</i> subsp. <i>spatulata</i> <sup>1</sup>    | – <sup>m</sup> | Sapindaceae               | E | – <sup>n</sup>  | – <sup>p</sup> | P              | 645   | 0.7 | 1.3  | 2.6  | 526               | O | A                             | FC:PI |
| 692c | <i>Dodonaea viscosa</i> subsp. <i>cuneata</i> <sup>1</sup>      | – <sup>m</sup> | Sapindaceae               | E | – <sup>n</sup>  | – <sup>p</sup> | P              | 655   | 0.7 | 1.3  | 2.7  | 526               | O | A                             | FC:PI |
| 693a | <i>Dorycnium eriophthalmum</i> Webb & Berth.                    | – <sup>m</sup> | Fabaceae <sup>j</sup>     | E | 14 <sup>o</sup> | 2              | P              | 1,095 | 1.1 | 2.2  | 4.5  | 477               | O | <i>Glycine</i> <sup>e</sup>   | FC:PI |
| 694a | <i>Draba altaica</i> (C.A.Mey.) Bunge                           | Yes            | Brassicaceae <sup>j</sup> | E | 18              | – <sup>p</sup> | – <sup>q</sup> | 303   | 0.3 | 0.6  | 1.2  | 599               | O | L                             | FC:PI |
| 694b | <i>Draba altaica</i> (C.A.Mey.) Bunge <sup>ai</sup>             | Yes            | Brassicaceae <sup>j</sup> | E | 16              | 2 <sup>z</sup> | P              | 274   | 0.3 | 0.6  | 1.1  | 505 <sup>ai</sup> | O | G <sup>c</sup>                | CIA   |
| 695a | <i>Draba doerfleri</i> Wettst.                                  | Yes            | Brassicaceae <sup>j</sup> | E | 16              | – <sup>p</sup> | – <sup>q</sup> | 509   | 0.5 | 1.0  | 2.1  | 599               | O | L                             | FC:PI |

Continued

| Entry number <sup>e</sup> | Species                                            | Voucher        | Family                    | Higher group <sup>#</sup> | 2n <sup>‡</sup>         | Ploidy level (x) | Life cycle type <sup>§</sup> | DNA amount             |         |         |         | Original ref. <sup>a</sup> | Present amount <sup>†</sup> | Standard species <sup>*b1</sup> | Method <sup>††</sup> |
|---------------------------|----------------------------------------------------|----------------|---------------------------|---------------------------|-------------------------|------------------|------------------------------|------------------------|---------|---------|---------|----------------------------|-----------------------------|---------------------------------|----------------------|
|                           |                                                    |                |                           |                           |                         |                  |                              | 1C (Mbp <sup>b</sup> ) | 1C (pg) | 2C (pg) | 4C (pg) |                            |                             |                                 |                      |
| 696a                      | <i>Draba fladnizensis</i> Wulfen <sup>i, ai</sup>  | Yes            | Brassicaceae <sup>j</sup> | E                         | 16                      | 2 <sup>z</sup>   | P                            | 269                    | 0.3     | 0.6     | 1.1     | 505 <sup>ai</sup>          | O                           | G <sup>c</sup>                  | CIA                  |
| 696b                      | <i>Draba fladnizensis</i> Wulfen <sup>i, ai</sup>  | Yes            | Brassicaceae <sup>j</sup> | E                         | 16                      | 2 <sup>z</sup>   | P                            | 303                    | 0.3     | 0.6     | 1.2     | 505 <sup>ai</sup>          | O                           | G <sup>c</sup>                  | CIA                  |
| 697a                      | <i>Draba glomerata</i> Royle                       | Yes            | Brassicaceae <sup>j</sup> | E                         | — <sup>n</sup>          | — <sup>p</sup>   | — <sup>q</sup>               | 391                    | 0.4     | 0.8     | 1.6     | 599                        | O                           | L                               | FC:PI                |
| 698a                      | <i>Draba lactea</i> Adams <sup>ai</sup>            | Yes            | Brassicaceae <sup>j</sup> | E                         | 32                      | 4 <sup>z</sup>   | P                            | 567                    | 0.6     | 1.2     | 2.3     | 505 <sup>ai</sup>          | O                           | G <sup>c</sup>                  | CIA                  |
| 699a                      | <i>Draba lactea</i> Adams <sup>ai</sup>            | Yes            | Brassicaceae <sup>j</sup> | E                         | 48                      | 6 <sup>z</sup>   | P                            | 954                    | 1.0     | 2.0     | 3.9     | 505 <sup>ai</sup>          | O                           | G <sup>c</sup>                  | CIA                  |
| 700a                      | <i>Draba lanceolata</i> Royle                      | Yes            | Brassicaceae <sup>j</sup> | E                         | 32 <sup>o</sup>         | — <sup>p</sup>   | — <sup>q</sup>               | 636                    | 0.7     | 1.3     | 2.6     | 599                        | O                           | L                               | FC:PI                |
| 701a                      | <i>Draba lonchocarpa</i> Rydb. <sup>ai</sup>       | Yes            | Brassicaceae <sup>j</sup> | E                         | 16                      | 2 <sup>z</sup>   | P                            | 298                    | 0.3     | 0.6     | 1.2     | 505 <sup>ai</sup>          | O                           | G <sup>c</sup>                  | CIA                  |
| 702a                      | <i>Draba nemorosa</i> L.                           | — <sup>m</sup> | Brassicaceae <sup>j</sup> | E                         | 16                      | — <sup>p</sup>   | — <sup>q</sup>               | 237                    | 0.2     | 0.5     | 1.0     | 509                        | O                           | — <sup>w</sup>                  | FC:PI                |
| 703a                      | <i>Draba nivalis</i> Lilj. <sup>i, ai</sup>        | Yes            | Brassicaceae <sup>j</sup> | E                         | 16                      | 2 <sup>z</sup>   | P                            | 308                    | 0.3     | 0.6     | 1.3     | 505 <sup>ai</sup>          | O                           | G <sup>c</sup>                  | CIA                  |
| 703b                      | <i>Draba nivalis</i> Lilj. <sup>i, ai</sup>        | Yes            | Brassicaceae <sup>j</sup> | E                         | 16                      | 2 <sup>z</sup>   | P                            | 254                    | 0.3     | 0.5     | 1.0     | 505 <sup>ai</sup>          | O                           | G <sup>c</sup>                  | CIA                  |
| 704a                      | <i>Draba palanderiana</i> Kjellm. <sup>i, ai</sup> | Yes            | Brassicaceae <sup>j</sup> | E                         | 16                      | 2 <sup>z</sup>   | P                            | 274                    | 0.3     | 0.6     | 1.1     | 505 <sup>ai</sup>          | O                           | G <sup>c</sup>                  | CIA                  |
| 705a                      | <i>Draba subcapitata</i> Simmons <sup>ai</sup>     | Yes            | Brassicaceae <sup>j</sup> | E                         | 16                      | 2 <sup>z</sup>   | P                            | 245                    | 0.3     | 0.5     | 1.0     | 505 <sup>ai</sup>          | O                           | G <sup>c</sup>                  | CIA                  |
| 706a                      | <i>Draba verna</i> Besser                          | Yes            | Brassicaceae <sup>j</sup> | E                         | 34, 36, 52 <sup>o</sup> | — <sup>p</sup>   | — <sup>q</sup>               | 391                    | 0.4     | 0.8     | 1.6     | 599                        | O                           | L                               | FC:PI                |
| 707a                      | <i>Dracaena draco</i> L. subsp. <i>draco</i>       | — <sup>m</sup> | Asparagaceae <sup>k</sup> | M                         | 40 <sup>o</sup>         | 4                | P                            | 905                    | 0.9     | 1.9     | 3.7     | 552                        | O                           | <i>Glycine</i> <sup>e</sup>     | FC:PI                |
| 708b                      | <i>Dracunculus canariensis</i> Kunth               | — <sup>m</sup> | Araceae                   | M                         | 28 <sup>o</sup>         | 4                | P                            | 3,863                  | 4.0     | 7.9     | 15.8    | 477                        | O                           | G <sup>c</sup>                  | FC:PI                |
| 709b                      | <i>Duchesnea indica</i> Focke                      | No             | Rosaceae                  | E                         | — <sup>n</sup>          | — <sup>p</sup>   | P                            | 2,049                  | 2.1     | 4.2     | 8.4     | 492                        | O                           | <i>Glycine</i> <sup>e</sup>     | FC:PI                |
| 710a                      | <i>Dyckia estevessii</i> Rauh                      | Yes            | Bromeliaceae              | M                         | — <sup>n</sup>          | — <sup>p</sup>   | P                            | 782                    | 0.8     | 1.6     | 3.2     | 575                        | O                           | <i>Raphanus</i> <sup>e</sup>    | FC:PI                |
| 711a                      | <i>Dyckia floribunda</i> Griseb.                   | Yes            | Bromeliaceae              | M                         | — <sup>n</sup>          | — <sup>p</sup>   | P                            | 773                    | 0.8     | 1.6     | 3.2     | 575                        | O                           | <i>Raphanus</i> <sup>e</sup>    | FC:PI                |
| 712a                      | <i>Ecdiocola monostachya</i> F.Muell.              | Yes            | Ecdiocolaceae             | M                         | c. 38                   | — <sup>p</sup>   | P                            | 966                    | 1.0     | 2.0     | 4.0     | 612                        | O                           | K                               | FC:PI                |
| 713a                      | <i>Echinopogon ovatus</i> (G.Forst.) P.Beauv.      | Yes            | Poaceae <sup>j</sup>      | M                         | 42 <sup>o</sup>         | 6                | P                            | 5,306                  | 5.4     | 10.9    | 21.7    | 528                        | O                           | — <sup>w</sup>                  | FC:PI                |
| 714a                      | <i>Echinops bannaticus</i> Rochel ex Schrad.       | No             | Asteraceae <sup>j</sup>   | E                         | 30                      | 2                | P                            | 3,462                  | 3.5     | 7.1     | 14.2    | 502                        | O                           | F <sup>b2</sup>                 | FC:PI                |
| 715a                      | <i>Echinops bithynicus</i> Boiss.                  | No             | Asteraceae <sup>j</sup>   | E                         | 28                      | 2                | P                            | 3,237                  | 3.3     | 6.6     | 13.2    | 502                        | O                           | F <sup>b2</sup>                 | FC:PI                |
| 716a                      | <i>Echinops cornigerus</i> DC.                     | No             | Asteraceae <sup>j</sup>   | E                         | 28                      | 2                | P                            | 2,988                  | 3.1     | 6.1     | 12.2    | 502                        | O                           | F <sup>b2</sup>                 | FC:PI                |
| 717a                      | <i>Echinops ecbatanus</i> Bormm. ex Rech.          | Yes            | Asteraceae <sup>j</sup>   | E                         | 30                      | 2                | P                            | 2,626                  | 2.7     | 5.4     | 10.7    | 502                        | O                           | F <sup>b2</sup>                 | FC:PI                |
| 718a                      | <i>Echinops exaltatus</i> Schrad.                  | No             | Asteraceae <sup>j</sup>   | E                         | 30                      | 2                | P                            | 3,663                  | 3.7     | 7.5     | 15.0    | 502                        | O                           | F <sup>b2</sup>                 | FC:PI                |
| 719a                      | <i>Echinops hedgeri</i> Kit Tan                    | No             | Asteraceae <sup>j</sup>   | E                         | 30                      | 2                | P                            | 4,489                  | 4.6     | 9.2     | 18.4    | 502                        | O                           | F <sup>b2</sup>                 | FC:PI                |
| 720a                      | <i>Echinops humilis</i> Bieb.                      | No             | Asteraceae <sup>j</sup>   | E                         | 30                      | 2                | P                            | 4,210                  | 4.3     | 8.6     | 17.2    | 502                        | O                           | F <sup>b2</sup>                 | FC:PI                |
| 721a                      | <i>Echinops nanus</i> Bunge                        | Yes            | Asteraceae <sup>j</sup>   | E                         | 28                      | 2                | A                            | 1,888                  | 1.9     | 3.9     | 7.7     | 502                        | O                           | F <sup>b2</sup>                 | FC:PI                |
| 722a                      | <i>Echinops niveus</i> Wall.                       | No             | Asteraceae <sup>j</sup>   | E                         | 28                      | 2                | P                            | 3,511                  | 3.6     | 7.2     | 14.4    | 502                        | O                           | F <sup>b2</sup>                 | FC:PI                |
| 723a                      | <i>Echinops orientalis</i> Trautv.                 | No             | Asteraceae <sup>j</sup>   | E                         | c. 30                   | 2                | P                            | 3,756                  | 3.8     | 7.7     | 15.4    | 502                        | O                           | F <sup>b2</sup>                 | FC:PI                |
| 724a                      | <i>Echinops persicus</i> Stev. & Fisch. ex Fisch.  | No             | Asteraceae <sup>j</sup>   | E                         | c. 30                   | 2                | P                            | 3,496                  | 3.6     | 7.2     | 14.3    | 502                        | O                           | F <sup>b2</sup>                 | FC:PI                |
| 725a                      | <i>Echinops ruthenicus</i> (Fisch.) M.B.           | No             | Asteraceae <sup>j</sup>   | E                         | 30                      | 2                | P                            | 3,687                  | 3.8     | 7.5     | 15.1    | 502                        | O                           | F <sup>b2</sup>                 | FC:PI                |
| 726a                      | <i>Echinops saissanicus</i> (B.Keller) Bobrov      | Yes            | Asteraceae <sup>j</sup>   | E                         | 32                      | 2                | P                            | 4,597                  | 4.7     | 9.4     | 18.8    | 502                        | O                           | F <sup>b2</sup>                 | FC:PI                |



|      |                                                                         |                  |                         |   |                          |                |   |        |      |      |      |     |   |                              |       |
|------|-------------------------------------------------------------------------|------------------|-------------------------|---|--------------------------|----------------|---|--------|------|------|------|-----|---|------------------------------|-------|
| 727a | <i>Echinops siculus</i> Strobl                                          | No               | Asteraceae <sup>j</sup> | E | 30                       | 2              | P | 4,054  | 4.1  | 8.3  | 16.6 | 502 | O | F <sup>b2</sup>              | FC:PI |
| 728a | <i>Echinops sphaerocephalus</i> L.                                      | No               | Asteraceae <sup>j</sup> | E | 30                       | 2              | P | 3,775  | 3.9  | 7.7  | 15.4 | 502 | O | F <sup>b2</sup>              | FC:PI |
| 729a | <i>Echinops spinosissimus</i> Turra subsp. <i>spinosissimus</i>         | No               | Asteraceae <sup>j</sup> | E | 28                       | 2              | P | 3,623  | 3.7  | 7.4  | 14.8 | 502 | O | F <sup>b2</sup>              | FC:PI |
| 730a | <i>Echinops strigosus</i> L.                                            | Yes              | Asteraceae <sup>j</sup> | E | 32                       | 2              | A | 1,223  | 1.3  | 2.5  | 5.0  | 502 | O | F <sup>b2</sup>              | FC:PI |
| 731a | <i>Echinops szowitzii</i> Fisch. & C.A.Mey. ex DC.                      | No               | Asteraceae <sup>j</sup> | E | 30                       | 2              | P | 3,609  | 3.7  | 7.4  | 14.8 | 502 | O | F <sup>b2</sup>              | FC:PI |
| 732a | <i>Echinops talassicus</i> Golosk.                                      | Yes              | Asteraceae <sup>j</sup> | E | 28                       | 2              | P | 5,037  | 5.2  | 10.3 | 20.6 | 502 | O | F <sup>b2</sup>              | FC:PI |
| 733a | <i>Echinops tournefortii</i> Ledeb.                                     | No               | Asteraceae <sup>j</sup> | E | 30                       | 2              | P | 3,599  | 3.7  | 7.4  | 14.7 | 502 | O | F <sup>b2</sup>              | FC:PI |
| 734a | <i>Echinops tschimganicus</i> B.Fedtsch.                                | Yes              | Asteraceae <sup>j</sup> | E | 32                       | 2              | P | 2,518  | 2.6  | 5.2  | 10.3 | 502 | O | F <sup>b2</sup>              | FC:PI |
| 735a | <i>Echinops viscosus</i> subsp. <i>viscosus</i> DC.                     | No               | Asteraceae <sup>j</sup> | E | 28                       | 2              | P | 3,399  | 3.5  | 7.0  | 13.9 | 502 | O | F <sup>b2</sup>              | FC:PI |
| 736a | <i>Echium aculeatum</i> Poir.                                           | – <sup>m</sup>   | Boraginaceae            | E | 16 (32) <sup>o</sup>     | 2              | P | 494    | 0.5  | 1.0  | 2.0  | 552 | O | <i>Raphanus</i> <sup>c</sup> | FC:PI |
| 737a | <i>Echium bethencourtii</i> A.Santos                                    | – <sup>m</sup>   | Boraginaceae            | E | 16                       | 2              | P | 484    | 0.5  | 1.0  | 2.0  | 552 | O | <i>Raphanus</i> <sup>c</sup> | FC:PI |
| 738a | <i>Echium bonnetii</i> Coincy                                           | – <sup>m</sup>   | Boraginaceae            | E | 16                       | 2              | A | 313    | 0.3  | 0.6  | 1.3  | 552 | O | <i>Raphanus</i> <sup>c</sup> | FC:PI |
| 739a | <i>Echium brevirame</i> Sprague & Hutch.                                | – <sup>m</sup>   | Boraginaceae            | E | 16 (32) <sup>o</sup>     | 2              | P | 474    | 0.5  | 1.0  | 1.9  | 552 | O | <i>Raphanus</i> <sup>c</sup> | FC:PI |
| 740a | <i>Echium decaisnei</i> subsp. <i>decaisnei</i> Webb                    | – <sup>m</sup>   | Boraginaceae            | E | 16 <sup>o</sup>          | 2              | P | 440    | 0.5  | 0.9  | 1.8  | 552 | O | <i>Raphanus</i> <sup>c</sup> | FC:PI |
| 741a | <i>Echium gentianoides</i> Webb ex Coincy                               | – <sup>m</sup>   | Boraginaceae            | E | 16 <sup>o</sup>          | 2              | P | 460    | 0.5  | 0.9  | 1.9  | 552 | O | <i>Raphanus</i> <sup>c</sup> | FC:PI |
| 742a | <i>Echium hierrense</i> Webb ex Bolle                                   | – <sup>m</sup>   | Boraginaceae            | E | 16 <sup>o</sup>          | 2              | P | 494    | 0.5  | 1.0  | 2.0  | 552 | O | <i>Raphanus</i> <sup>c</sup> | FC:PI |
| 743a | <i>Echium leucophaeum</i> Webb ex. Sprague & Hutch.                     | – <sup>m</sup>   | Boraginaceae            | E | 16 <sup>o</sup>          | 2              | P | 474    | 0.5  | 1.0  | 1.9  | 552 | O | <i>Raphanus</i> <sup>c</sup> | FC:PI |
| 744a | <i>Echium simplex</i> DC.                                               | – <sup>m</sup>   | Boraginaceae            | E | 16 <sup>o</sup>          | 2              | P | 460    | 0.5  | 0.9  | 1.9  | 552 | O | <i>Raphanus</i> <sup>c</sup> | FC:PI |
| 745a | <i>Echium strictum</i> L.f. subsp. <i>strictum</i>                      | – <sup>m</sup>   | Boraginaceae            | E | 16 (32) <sup>o</sup>     | 2              | P | 411    | 0.4  | 0.8  | 1.7  | 552 | O | <i>Raphanus</i> <sup>c</sup> | FC:PI |
| 746a | <i>Echium triste</i> Svent. subsp. <i>triste</i>                        | – <sup>m</sup>   | Boraginaceae            | E | 16 (32) <sup>o</sup>     | 2              | P | 474    | 0.5  | 1.0  | 1.9  | 552 | O | <i>Raphanus</i> <sup>c</sup> | FC:PI |
| 747a | <i>Echium virescens</i> DC.                                             | – <sup>m</sup>   | Boraginaceae            | E | 16 (24, 32) <sup>o</sup> | 2              | P | 450    | 0.5  | 0.9  | 1.8  | 552 | O | <i>Raphanus</i> <sup>c</sup> | FC:PI |
| 748a | <i>Echium webbii</i> Coincy                                             | – <sup>m</sup>   | Boraginaceae            | E | 16 <sup>o</sup>          | 2              | P | 479    | 0.5  | 1.0  | 2.0  | 552 | O | <i>Raphanus</i> <sup>c</sup> | FC:PI |
| 749a | <i>Einadia nutans</i> (R.Br.) A.J.Scott                                 | – <sup>m</sup>   | Amaranthaceae           | E | – <sup>n</sup>           | – <sup>p</sup> | P | 983    | 1.0  | 2.0  | 4.0  | 526 | O | A                            | FC:PI |
| 750a | <i>Elaeis guineensis</i> Jacq.                                          | No               | Arecaceae <sup>j</sup>  | M | 32 <sup>o</sup>          | 2              | P | 1,839  | 1.9  | 3.8  | 7.5  | 548 | O | <i>Petunia</i> <sup>c</sup>  | FC:PI |
| 751a | <i>Elymus apricus</i> Á.Lðve & Connor                                   | Yes              | Poaceae <sup>j</sup>    | M | 42 <sup>o</sup>          | 6              | P | 13,790 | 14.1 | 28.2 | 56.4 | 528 | O | – <sup>w</sup>               | FC:PI |
| 752b | <i>Elymus elongatus</i> (= <i>Agropyron elongatum</i> ) (Host) Runemark | No <sup>m1</sup> | Poaceae <sup>j</sup>    | M | 14                       | 2              | P | 5,712  | 5.8  | 11.7 | 23.4 | 605 | O | F-2118p                      | FC:PI |
| 753a | <i>Elymus ensyisii</i> (Kirk) Á.Lðve & Connor                           | Yes              | Poaceae <sup>j</sup>    | M | 28 <sup>o</sup>          | 4              | P | 10,044 | 10.3 | 20.5 | 41.1 | 528 | O | – <sup>w</sup>               | FC:PI |
| 754a | <i>Elymus falcis</i> Connor                                             | Yes              | Poaceae <sup>j</sup>    | M | 42                       | 6              | P | 13,482 | 13.8 | 27.6 | 55.1 | 528 | O | – <sup>w</sup>               | FC:PI |
| 755a | <i>Elymus multiflorus</i> (Hook.f.) Á.Lðve & Connor                     | Yes              | Poaceae <sup>j</sup>    | M | 42 <sup>o</sup>          | 6              | P | 12,303 | 12.6 | 25.2 | 50.3 | 528 | O | – <sup>w</sup>               | FC:PI |
| 756a | <i>Elymus sacandros</i> Connor                                          | Yes              | Poaceae <sup>j</sup>    | M | 42                       | 6              | P | 13,565 | 13.9 | 27.7 | 55.5 | 528 | O | – <sup>w</sup>               | FC:PI |

Continued

| Entry number <sup>g</sup> | Species                                              | Voucher        | Family                    | Higher group <sup>#</sup> | 2n <sup>‡</sup> | Ploidy level (x) | Life cycle type <sup>§</sup> | DNA amount             |                |         |         | Original ref. <sup>a</sup> | Present amount <sup>†</sup> | Standard species <sup>*b1</sup> | Method <sup>††</sup> |
|---------------------------|------------------------------------------------------|----------------|---------------------------|---------------------------|-----------------|------------------|------------------------------|------------------------|----------------|---------|---------|----------------------------|-----------------------------|---------------------------------|----------------------|
|                           |                                                      |                |                           |                           |                 |                  |                              | 1C (Mbp <sup>s</sup> ) | 1C (pg)        | 2C (pg) | 4C (pg) |                            |                             |                                 |                      |
| 757a                      | <i>Elymus solandri</i> (Steud.) Connor <sup>j</sup>  | Yes            | Poaceae <sup>j</sup>      | M                         | 42              | 6                | P                            | 13,966                 | 14.3           | 28.6    | 57.1    | 528                        | O                           | – <sup>w</sup>                  | FC:PI                |
| 758a                      | <i>Elymus tenuis</i> (Buchanan) Á.Löve & Connor      | Yes            | Poaceae <sup>j</sup>      | M                         | 56              | 8                | P                            | 15,692                 | 16.0           | 32.1    | 64.2    | 528                        | O                           | – <sup>w</sup>                  | FC:PI                |
| 759a                      | <i>Elytrigia intermedia</i> (Host) Nevaki            | Yes            | Poaceae <sup>j</sup>      | M                         | 42              | 6                | P                            | 13,223                 | 13.5           | 27.0    | 54.1    | 593                        | O                           | A <sup>c</sup>                  | FC:PI                |
| 760a                      | <i>Elytrigia intermedia</i> (Host) Nevaki            | Yes            | Poaceae <sup>j</sup>      | M                         | 63              | 9                | P                            | – <sup>t</sup>         | – <sup>t</sup> | 40.6    | 81.1    | 593                        | O                           | A <sup>c</sup>                  | FC:PI                |
| 761a                      | <i>Elytrigia repens</i> (L.) Nevski                  | Yes            | Poaceae <sup>j</sup>      | M                         | 42              | 6                | P                            | 11,379                 | 11.6           | 23.3    | 46.5    | 593                        | O                           | A <sup>c</sup>                  | FC:PI                |
| 762a                      | <i>Elytrigia repens</i> (L.) Nevski                  | Yes            | Poaceae <sup>j</sup>      | M                         | 63              | 9                | P                            | – <sup>t</sup>         | – <sup>t</sup> | 34.9    | 69.8    | 593                        | O                           | A <sup>c</sup>                  | FC:PI                |
| 763a                      | <i>Empetrum hermaphroditum</i> Hagerup               | Yes            | Ericaceae <sup>k</sup>    | E                         | 52 <sup>o</sup> | 4                | P                            | 1,252                  | 1.3            | 2.6     | 5.1     | 496                        | O                           | <i>Raphanus</i> <sup>c</sup>    | FC:PI                |
| 764a                      | <i>Empetrum nigrum</i> L.                            | Yes            | Ericaceae <sup>k</sup>    | E                         | 26 <sup>o</sup> | 2                | P                            | 631                    | 0.6            | 1.3     | 2.6     | 496                        | O                           | <i>Raphanus</i> <sup>c</sup>    | FC:PI                |
| 765a                      | <i>Encholirium irwinii</i> L.B.Sm                    | Yes            | Bromeliaceae              | M                         | – <sup>n</sup>  | – <sup>p</sup>   | P                            | 851                    | 0.9            | 1.7     | 3.5     | 575                        | O                           | <i>Raphanus</i> <sup>c</sup>    | FC:PI                |
| 766a                      | <i>Ensete gillettii</i> (De Wild.) Cheesman          | No             | Musaceae                  | M                         | 18              | 2                | P                            | 592                    | 0.6            | 1.2     | 2.4     | 503                        | O                           | <i>Glycine</i> <sup>e</sup>     | FC:PI                |
| 767a                      | <i>Enteropogon acicularis</i> (Lindl.) Laxarides     | – <sup>m</sup> | Poaceae <sup>j</sup>      | M                         | – <sup>n</sup>  | – <sup>p</sup>   | P                            | 523                    | 0.5            | 1.1     | 2.1     | 526                        | O                           | A                               | FC:PI                |
| 768b                      | <i>Epilobium hirsutum</i> L.                         | No             | Onagraceae                | E                         | 36 <sup>o</sup> | 2                | P                            | 406                    | 0.4            | 0.8     | 1.7     | 577                        | O                           | <i>Sorghum</i> <sup>c</sup>     | FC:PI                |
| 769a                      | <i>Erigeron calderae</i> Hans.                       | – <sup>m</sup> | Asteraceae <sup>j</sup>   | E                         | 18              | 2                | P                            | 1,516                  | 1.6            | 3.1     | 6.2     | 477                        | O                           | <i>Glycine</i> <sup>c</sup>     | FC:PI                |
| 770b                      | <i>Eruca sativa</i> Mill.                            | Yes            | Brassicaceae <sup>j</sup> | E                         | 22              | – <sup>p</sup>   | A                            | 655                    | 0.7            | 1.3     | 2.7     | 599                        | O                           | L                               | FC:PI                |
| 771b                      | <i>Erycina diaphana</i> Schltr.                      | Yes            | Orchidaceae               | M                         | – <sup>n</sup>  | – <sup>p</sup>   | P                            | 1,888                  | 1.9            | 3.9     | 7.7     | 504 <sup>ah</sup>          | O                           | F                               | Fe                   |
| 772a                      | <i>Erycina pusilla</i> (L.) N.H.Williams & M.W.Chase | Yes            | Orchidaceae               | M                         | – <sup>n</sup>  | – <sup>p</sup>   | P                            | 1,467                  | 1.5            | 3.0     | 6.0     | 504 <sup>ah</sup>          | O                           | – <sup>w</sup>                  | FC:DAPI              |
| 773a                      | <i>Erysimum bicolor</i> (Hornem.) DC.                | – <sup>m</sup> | Brassicaceae <sup>j</sup> | E                         | 28 <sup>o</sup> | 4                | P                            | 567                    | 0.6            | 1.2     | 2.3     | 477                        | O                           | <i>Solan.</i> <sup>c</sup>      | FC:PI                |
| 774a                      | <i>Erysimum bicolor</i> (Hornem.) DC.                | Yes            | Brassicaceae <sup>j</sup> | E                         | 42              | 6                | P                            | 743                    | 0.8            | 1.5     | 3.0     | 599                        | O                           | L                               | FC:PI                |
| 775a                      | <i>Erysimum cheiranthoides</i> L.                    | Yes            | Brassicaceae <sup>j</sup> | E                         | 46-48           | – <sup>p</sup>   | – <sup>q</sup>               | 812                    | 0.8            | 1.7     | 3.3     | 599                        | O                           | L                               | FC:PI                |
| 776a                      | <i>Erysimum scoparium</i> (Bross. ex Willd.) Wettst. | – <sup>m</sup> | Brassicaceae <sup>j</sup> | E                         | 28              | 4                | P                            | 528                    | 0.5            | 1.1     | 2.2     | 477                        | O                           | <i>Solan.</i> <sup>c</sup>      | FC:PI                |
| 777a                      | <i>Erythrina blake</i> (Hort.) Parker                | No             | Fabaceae <sup>j</sup>     | E                         | 42 <sup>o</sup> | 2                | P                            | 1,308                  | 1.3            | 2.7     | 5.4     | 501 <sup>ag</sup>          | O                           | B <sup>c</sup>                  | Fe                   |
| 778a                      | <i>Erythrina caffra</i> Blanco                       | No             | Fabaceae <sup>j</sup>     | E                         | 42 <sup>o</sup> | 2                | P                            | 1,724                  | 1.8            | 3.5     | 7.1     | 501 <sup>ag</sup>          | O                           | B <sup>c</sup>                  | Fe                   |
| 779a                      | <i>Erythrina corallodendron</i> L.                   | No             | Fabaceae <sup>j</sup>     | E                         | 42 <sup>o</sup> | 2                | P                            | 1,281                  | 1.3            | 2.6     | 5.2     | 501 <sup>ag</sup>          | O                           | B <sup>c</sup>                  | Fe                   |
| 780a                      | <i>Erythrina fusca</i> Lour.                         | No             | Fabaceae <sup>j</sup>     | E                         | 42 <sup>o</sup> | 2 <sup>p</sup>   | P                            | 1,100                  | 1.1            | 2.3     | 4.5     | 501 <sup>ag</sup>          | O                           | B <sup>c</sup>                  | Fe                   |
| 781a                      | <i>Erythrina humeana</i> Spreng                      | No             | Fabaceae <sup>j</sup>     | E                         | – <sup>n</sup>  | – <sup>p</sup>   | P                            | 1,377                  | 1.4            | 2.8     | 5.6     | 501 <sup>ag</sup>          | O                           | B <sup>c</sup>                  | Fe                   |
| 782a                      | <i>Erythrina lithosperma</i> Blume ex Miq.           | No             | Fabaceae <sup>j</sup>     | E                         | 42 <sup>o</sup> | 2                | P                            | 1,450                  | 1.5            | 3.0     | 5.9     | 501 <sup>ag</sup>          | O                           | B <sup>c</sup>                  | Fe                   |

|      |                                                         |                |                           |   |                |                |                |       |     |      |      |                   |   |                             |         |
|------|---------------------------------------------------------|----------------|---------------------------|---|----------------|----------------|----------------|-------|-----|------|------|-------------------|---|-----------------------------|---------|
| 783a | <i>Erythrina lysistemon</i> Hutch.                      | No             | Fabaceae <sup>j</sup>     | E | 42°            | 2              | P              | 1,391 | 1.4 | 2.8  | 5.7  | 501 <sup>ag</sup> | O | B <sup>c</sup>              | Fe      |
| 784a | <i>Erythrina resupinata</i> Moritz                      | No             | Fabaceae <sup>j</sup>     | E | 42°            | 2              | P              | 1,731 | 1.8 | 3.5  | 7.1  | 501 <sup>ag</sup> | O | B <sup>c</sup>              | Fe      |
| 785a | <i>Erythrina stricta</i> Roxb.                          | No             | Fabaceae <sup>j</sup>     | E | 42°            | 2              | P              | 990   | 1.0 | 2.0  | 4.1  | 501 <sup>ag</sup> | O | B <sup>c</sup>              | Fe      |
| 786b | <i>Erythrina suberosa</i> Roxb.                         | No             | Fabaceae <sup>j</sup>     | E | 42°            | 2              | P              | 1,606 | 1.6 | 3.3  | 6.6  | 501 <sup>ag</sup> | O | B <sup>c</sup>              | Fe      |
| 787a | <i>Erythrina variegata</i> L.                           | No             | Fabaceae <sup>j</sup>     | E | 42°            | 2              | P              | 1,667 | 1.7 | 3.4  | 6.8  | 501 <sup>ag</sup> | O | B <sup>c</sup>              | Fe      |
| 788a | <i>Erythrina velutina</i> Willd.                        | No             | Fabaceae <sup>j</sup>     | E | 42°            | 2              | P              | 1,203 | 1.2 | 2.5  | 4.9  | 501 <sup>ag</sup> | O | B <sup>c</sup>              | Fe      |
| 789a | <i>Erythrina vespertilio</i> Benth.                     | No             | Fabaceae <sup>j</sup>     | E | 42°            | 2              | P              | 1,095 | 1.1 | 2.2  | 4.5  | 501 <sup>ag</sup> | O | B <sup>c</sup>              | Fe      |
| 790a | <i>Eucalyptus camaldulensis</i> Dehnh.                  | No             | Myrtaceae                 | E | 22°            | 2              | P              | 601   | 0.6 | 1.2  | 2.5  | 516               | O | <i>Gallus</i> <sup>f</sup>  | FC:DAPI |
| 791a | <i>Eucalyptus citriodora</i> Hook.                      | No             | Myrtaceae                 | E | 22°            | 2              | P              | 377   | 0.4 | 0.8  | 1.5  | 516               | O | <i>Gallus</i> <sup>f</sup>  | FC:DAPI |
| 792a | <i>Eucalyptus dunnii</i> Maiden                         | No             | Myrtaceae                 | E | 22°            | 2              | P              | 538   | 0.6 | 1.1  | 2.2  | 516               | O | <i>Gallus</i> <sup>f</sup>  | FC:DAPI |
| 793a | <i>Eucalyptus elata</i> Dehnh.                          | – <sup>m</sup> | Myrtaceae                 | E | – <sup>n</sup> | – <sup>p</sup> | P              | 597   | 0.6 | 1.2  | 2.4  | 526               | O | A                           | FC:PI   |
| 794b | <i>Eucalyptus globulus</i> Labill.                      | No             | Myrtaceae                 | E | 22°            | 2              | P              | 533   | 0.5 | 1.1  | 2.2  | 516               | O | <i>Gallus</i> <sup>f</sup>  | FC:DAPI |
| 794c | <i>Eucalyptus globulus</i> Labill. <sup>aj</sup>        | No             | Myrtaceae                 | E | 22°            | 2              | P              | 685   | 0.7 | 1.4  | 2.8  | 506 <sup>aj</sup> | O | <i>Solan.</i> <sup>c</sup>  | FC:PI   |
| 795a | <i>Eucalyptus grandis</i> Hill ex Maiden                | No             | Myrtaceae                 | E | 22°            | 2              | P              | 650   | 0.7 | 1.3  | 2.7  | 516               | O | <i>Gallus</i> <sup>f</sup>  | FC:DAPI |
| 796a | <i>Eucalyptus pellita</i> F.Muell.                      | No             | Myrtaceae                 | E | 22°            | 2              | P              | 670   | 0.7 | 1.4  | 2.7  | 516               | O | <i>Gallus</i> <sup>f</sup>  | FC:DAPI |
| 797a | <i>Eucalyptus resinifera</i> Smith                      | No             | Myrtaceae                 | E | 22°            | 2              | P              | 626   | 0.6 | 1.3  | 2.6  | 516               | O | <i>Gallus</i> <sup>f</sup>  | FC:DAPI |
| 798a | <i>Eucalyptus robusta</i> Smith                         | No             | Myrtaceae                 | E | 22°            | 2              | P              | 660   | 0.7 | 1.4  | 2.7  | 516               | O | <i>Gallus</i> <sup>f</sup>  | FC:DAPI |
| 799a | <i>Eucalyptus saligna</i> Smith                         | No             | Myrtaceae                 | E | 22°            | 2              | P              | 719   | 0.7 | 1.5  | 2.9  | 516               | O | <i>Gallus</i> <sup>f</sup>  | FC:DAPI |
| 800a | <i>Eucalyptus tereticornis</i> Smith                    | No             | Myrtaceae                 | E | 22°            | 2              | P              | 587   | 0.6 | 1.2  | 2.4  | 516               | O | <i>Gallus</i> <sup>f</sup>  | FC:DAPI |
| 801a | <i>Eucalyptus torelliana</i> F.Muell.                   | No             | Myrtaceae                 | E | 22°            | 2              | P              | 391   | 0.4 | 0.8  | 1.6  | 516               | O | <i>Gallus</i> <sup>f</sup>  | FC:DAPI |
| 802a | <i>Eucalyptus urophylla</i> S.T.Blake                   | No             | Myrtaceae                 | E | 22°            | 2              | P              | 655   | 0.7 | 1.3  | 2.7  | 516               | O | <i>Gallus</i> <sup>f</sup>  | FC:DAPI |
| 803a | <i>Euclidium syriacum</i> (L.) R.Br.                    | Yes            | Brassicaceae <sup>j</sup> | E | 14             | 2              | – <sup>q</sup> | 264   | 0.3 | 0.5  | 1.1  | 599               | O | L                           | FC:PI   |
| 804a | <i>Euphorbia aphylla</i> Brouss. ex Willd.              | – <sup>m</sup> | Euphorbiaceae             | E | 20°            | 2              | P              | 2,161 | 2.2 | 4.4  | 8.8  | 552               | O | H <sup>c</sup>              | FC:PI   |
| 805a | <i>Euphorbia atropurpurea</i> (Brouss.) Webb & Berthel. | – <sup>m</sup> | Euphorbiaceae             | E | 20°            | 2              | P              | 2,029 | 2.1 | 4.2  | 8.3  | 552               | O | H <sup>c</sup>              | FC:PI   |
| 806a | <i>Euphorbia obtusifolia</i> Poir. in Lam.              | –              | Euphorbiaceae             | E | 20             | 2              | P              | 2,098 | 2.1 | 4.3  | 8.6  | 552               | O | H <sup>c</sup>              | FC:PI   |
| 807a | <i>Euphorbia peplus</i> L.                              | No             | Euphorbiaceae             | E | 22°            | 2              | P              | 337   | 0.3 | 0.7  | 1.4  | 563               | O | <i>Solan.</i> <sup>c</sup>  | FC:PI   |
| 808a | <i>Euptelea pleiosperma</i> Hook.f. & Thomson           | No             | Eupteleaceae              | E | 28             | – <sup>p</sup> | P              | 653   | 0.7 | 1.3  | 2.7  | 612               | O | <i>Solan.</i> <sup>c</sup>  | FC:PI   |
| 809a | <i>Eutaxia microphylla</i> (R.Br.) C.H.Wright & Dewar   | – <sup>m</sup> | Fabaceae <sup>j</sup>     | E | – <sup>n</sup> | – <sup>p</sup> | – <sup>q</sup> | 1,584 | 1.6 | 3.2  | 6.5  | 526               | O | A                           | FC:PI   |
| 810e | <i>Fagus sylvatica</i> L.                               | No             | Fagaceae                  | E | – <sup>n</sup> | – <sup>p</sup> | P              | 636   | 0.7 | 1.3  | 2.6  | 492               | O | <i>Glycine</i> <sup>e</sup> | FC:PI   |
| 810f | <i>Fagus sylvatica</i> L.                               | Yes            | Fagaceae                  | E | – <sup>n</sup> | – <sup>p</sup> | P              | 709   | 0.7 | 1.5  | 2.9  | 489               | O | – <sup>w</sup>              | FC:EB   |
| 811a | <i>Festuca actae</i> Connor                             | Yes            | Poaceae <sup>j</sup>      | M | 42             | 6              | P              | 8,078 | 8.3 | 16.5 | 33.0 | 528               | O | – <sup>w</sup>              | FC:PI   |
| 812a | <i>Festuca acuminata</i> Gaudin                         | – <sup>m</sup> | Poaceae <sup>j</sup>      | M | 14°            | 2              | P              | 3,216 | 3.3 | 6.6  | 13.2 | 555               | O | G <sup>c</sup>              | FC:PI   |
| 813a | <i>Festuca airoides</i> Lam. <sup>i</sup>               | – <sup>m</sup> | Poaceae <sup>j</sup>      | M | 14°            | 2              | P              | 2,387 | 2.4 | 4.9  | 9.8  | 555               | O | G <sup>c</sup>              | FC:PI   |

Continued

| Entry number <sup>g</sup> | Species                                                                                                          | Voucher        | Family               | Higher group <sup>#</sup> | 2n <sup>‡</sup> | Ploidy level (x) | Life cycle type <sup>§</sup> | DNA amount             |         |         |         | Original ref. <sup>a</sup> | Present amount <sup>†</sup> | Standard species <sup>*b1</sup> | Method <sup>††</sup> |
|---------------------------|------------------------------------------------------------------------------------------------------------------|----------------|----------------------|---------------------------|-----------------|------------------|------------------------------|------------------------|---------|---------|---------|----------------------------|-----------------------------|---------------------------------|----------------------|
|                           |                                                                                                                  |                |                      |                           |                 |                  |                              | 1C (Mbp <sup>§</sup> ) | 1C (pg) | 2C (pg) | 4C (pg) |                            |                             |                                 |                      |
| 814a                      | <i>Festuca alpestris</i> Roem. & Schult.                                                                         | – <sup>m</sup> | Poaceae <sup>i</sup> | M                         | 14              | 2                | P                            | 4,348                  | 4.4     | 8.9     | 17.8    | 555                        | O                           | G <sup>c</sup>                  | FC:PI                |
| 815a                      | <i>Festuca alpina</i> subsp. <i>alpina</i> Suter <sup>i</sup>                                                    | – <sup>m</sup> | Poaceae <sup>i</sup> | M                         | 14 <sup>o</sup> | 2                | P                            | 2,146                  | 2.2     | 4.4     | 8.8     | 555                        | O                           | G <sup>c</sup>                  | FC:PI                |
| 815b                      | <i>Festuca alpina</i> s.l. (alfrediana) Foggi & Signorini)                                                       | – <sup>m</sup> | Poaceae <sup>i</sup> | M                         | 14 <sup>o</sup> | 2                | P                            | 2,243                  | 2.3     | 4.6     | 9.2     | 555                        | O                           | G <sup>c</sup>                  | FC:PI                |
| 816a                      | <i>Festuca altaica</i> Trin.                                                                                     | – <sup>m</sup> | Poaceae <sup>i</sup> | M                         | 28 <sup>o</sup> | 4                | P                            | 7,335                  | 7.5     | 15.0    | 30.0    | 555                        | O                           | G <sup>c</sup>                  | FC:PI                |
| 817a                      | <i>Festuca altissima</i> All.                                                                                    | –              | Poaceae <sup>i</sup> | M                         | 14 <sup>o</sup> | 2                | P                            | 4,371                  | 4.5     | 8.9     | 17.9    | 555                        | O                           | G <sup>c</sup>                  | FC:PI                |
| 818a                      | <i>Festuca amethystina</i> L. subsp. <i>amethystina</i>                                                          | – <sup>m</sup> | Poaceae <sup>i</sup> | M                         | 28              | 4                | P                            | 6,342                  | 6.5     | 13.0    | 25.9    | 555                        | O                           | G <sup>c</sup>                  | FC:PI                |
| 819a                      | <i>Festuca ampla</i> Hack. subsp. <i>ampla</i>                                                                   | Yes            | Poaceae <sup>i</sup> | M                         | 28 <sup>z</sup> | 4 <sup>z</sup>   | P                            | 4,274                  | 4.4     | 8.7     | 17.5    | 582                        | O                           | H <sup>c</sup>                  | FC:PI                |
| 819b                      | <i>Festuca ampla</i> Hack. subsp. <i>transtagana</i> Hack.                                                       | Yes            | Poaceae <sup>i</sup> | M                         | 28 <sup>z</sup> | 4 <sup>z</sup>   | P                            | 4,479                  | 4.6     | 9.2     | 18.3    | 582                        | O                           | H <sup>c</sup>                  | FC:PI                |
| 820a                      | <i>Festuca arundinacea</i> Schreb. subsp. <i>uechtritziana</i>                                                   | – <sup>m</sup> | Poaceae <sup>i</sup> | M                         | 42 <sup>o</sup> | 6                | P                            | 8,303                  | 8.5     | 17.0    | 34.0    | 555                        | O                           | G <sup>c</sup>                  | FC:PI                |
| 820b                      | <i>Festuca arundinacea</i> Schreb. subsp. <i>arundinacea</i>                                                     | – <sup>m</sup> | Poaceae <sup>i</sup> | M                         | 42 <sup>o</sup> | 6                | P                            | 8,421                  | 8.6     | 17.2    | 34.4    | 555                        | O                           | G <sup>c</sup>                  | FC:PI                |
| 820c                      | <i>Festuca arundinacea</i> Schreb. subsp. <i>mediterranea</i> (Hack.) K.Richt.                                   | Yes            | Poaceae <sup>i</sup> | M                         | 42 <sup>o</sup> | 6                | P                            | 7,795                  | 8.0     | 15.9    | 31.9    | 582                        | O                           | G <sup>c</sup>                  | FC:PI                |
| 821a                      | <i>Festuca arvernensis</i> Auquier, Kerguélen & Markgr.-Dann. subsp. <i>arvernensis</i>                          | – <sup>m</sup> | Poaceae <sup>i</sup> | M                         | 14 <sup>o</sup> | 2                | P                            | 1,901                  | 1.9     | 3.9     | 7.8     | 555                        | O                           | G <sup>c</sup>                  | FC:PI                |
| 822a                      | <i>Festuca arvernensis</i> Auquier, Kerguélen & Markgr.-Dann. subsp. <i>costei</i> (St Yves) Auquier & Kerguélen | – <sup>m</sup> | Poaceae <sup>i</sup> | M                         | 28              | 4                | P                            | 4,449                  | 4.5     | 9.1     | 18.2    | 555                        | O                           | G <sup>c</sup>                  | FC:PI                |
| 823a                      | <i>Festuca auquieri</i> Kerguélen                                                                                | – <sup>m</sup> | Poaceae <sup>i</sup> | M                         | 28 <sup>o</sup> | 4                | P                            | 4,626                  | 4.7     | 9.5     | 18.9    | 555                        | O                           | G <sup>c</sup>                  | FC:PI                |
| 824a                      | <i>Festuca balcanica</i> (Acht.) Markgr.-Dann. subsp. <i>balcanica</i>                                           | – <sup>m</sup> | Poaceae <sup>i</sup> | M                         | 14 <sup>o</sup> | 2                | P                            | 3,624                  | 3.7     | 7.4     | 14.8    | 555                        | O                           | G <sup>c</sup>                  | FC:PI                |
| 825a                      | <i>Festuca billyi</i> Kerguélen & Plonka                                                                         | – <sup>m</sup> | Poaceae <sup>i</sup> | M                         | 42 <sup>o</sup> | 6                | P                            | 6,533                  | 6.7     | 13.4    | 26.7    | 555                        | O                           | G <sup>c</sup>                  | FC:PI                |
| 826a                      | <i>Festuca bosniaca</i> Kumm. & Sendtn. subsp. <i>pirinica</i> (Acht.) Markgr.-Dann.                             | – <sup>m</sup> | Poaceae <sup>i</sup> | M                         | 14 <sup>o</sup> | 2                | P                            | 3,414                  | 3.5     | 7.0     | 14.0    | 555                        | O                           | G <sup>c</sup>                  | FC:PI                |
| 826b                      | <i>Festuca bosniaca</i> Kumm. & Sendtn. subsp. <i>bosniaca</i>                                                   | – <sup>m</sup> | Poaceae <sup>i</sup> | M                         | 14 <sup>o</sup> | 2                | P                            | 3,617                  | 3.7     | 7.4     | 14.8    | 555                        | O                           | G <sup>c</sup>                  | FC:PI                |

|      |                                                                                  |                |                      |   |     |    |   |        |      |      |      |     |   |                            |       |
|------|----------------------------------------------------------------------------------|----------------|----------------------|---|-----|----|---|--------|------|------|------|-----|---|----------------------------|-------|
| 827a | <i>Festuca brachyphylla</i><br>Schultes                                          | No             | Poaceae <sup>j</sup> | M | 42° | 6  | P | 5,746  | 5-9  | 11-8 | 23-5 | 609 | O | <i>Gallus</i> <sup>f</sup> | FC:PI |
| 828a | <i>Festuca brevipila</i><br>R.Tracey                                             | No             | Poaceae <sup>j</sup> | M | 42  | 6  | P | 6,137  | 6-3  | 12-6 | 25-1 | 609 | O | <i>Gallus</i> <sup>f</sup> | FC:PI |
| 828b | <i>Festuca brevipila</i><br>R.Tracey                                             | – <sup>m</sup> | Poaceae <sup>j</sup> | M | 42° | 6  | P | 6,890  | 7-0  | 14-1 | 28-2 | 555 | O | G <sup>c</sup>             | FC:PI |
| 829a | <i>Festuca brigantina</i><br>(Markgr.-Dann.)<br>Markgr.-Dann.                    | – <sup>m</sup> | Poaceae <sup>j</sup> | M | 56  | 8  | P | 9,839  | 10-1 | 20-1 | 40-2 | 555 | O | G <sup>c</sup>             | FC:PI |
| 829b | <i>Festuca brigantina</i><br>Markgr.-Dann. subsp.<br><i>brigantina</i>           | Yes            | Poaceae <sup>j</sup> | M | 56  | 8  | P | 8,352  | 8-5  | 17-1 | 34-2 | 582 | O | G <sup>c</sup>             | FC:PI |
| 830a | <i>Festuca callieri</i> (Hack.)<br>Markgr.                                       | –              | Poaceae <sup>j</sup> | M | 28° | 4  | P | 4,778  | 4-9  | 9-8  | 19-5 | 555 | O | G <sup>c</sup>             | FC:PI |
| 831a | <i>Festuca calva</i> (Hack.)<br>K.Richt.                                         | –              | Poaceae <sup>j</sup> | M | 14° | 2  | P | 3,570  | 3-7  | 7-3  | 14-6 | 555 | O | G <sup>c</sup>             | FC:PI |
| 832a | <i>Festuca carumtina</i><br>R.Tracey                                             | – <sup>m</sup> | Poaceae <sup>j</sup> | M | 42° | 6  | P | 6,817  | 7-0  | 13-9 | 27-9 | 555 | O | G <sup>c</sup>             | FC:PI |
| 833a | <i>Festuca cf. taurica</i><br>(Hack.) Troutv.                                    | – <sup>m</sup> | Poaceae <sup>j</sup> | M | 14° | 2  | P | 2,292  | 2-3  | 4-7  | 9-4  | 555 | O | G <sup>c</sup>             | FC:PI |
| 834a | <i>Festuca cinerea</i> Vill.                                                     | –              | Poaceae <sup>j</sup> | M | 28° | 4  | P | 4,871  | 5-0  | 10-0 | 19-9 | 555 | O | G <sup>c</sup>             | FC:PI |
| 835a | <i>Festuca</i><br><i>circummediterranea</i><br>Patzke                            | –              | Poaceae <sup>j</sup> | M | 14  | 2  | P | 2,657  | 2-7  | 5-4  | 10-9 | 555 | O | G <sup>c</sup>             | FC:PI |
| 836a | <i>Festuca</i><br><i>circummediterranea</i><br>Patzke s.l.                       | –              | Poaceae <sup>j</sup> | M | 28° | 4  | P | 4,880  | 5-0  | 10-0 | 20-0 | 555 | O | G <sup>c</sup>             | FC:PI |
| 837a | <i>Festuca coxii</i> (Petrie)<br>Hack.                                           | Yes            | Poaceae <sup>j</sup> | M | 56  | 8  | P | 10,514 | 10-8 | 21-5 | 43-0 | 528 | O | – <sup>w</sup>             | FC:PI |
| 838a | <i>Festuca csikhegyensis</i><br>Simonk.                                          | –              | Poaceae <sup>j</sup> | M | 28  | 4  | P | 4,621  | 4-7  | 9-5  | 18-9 | 555 | O | G <sup>c</sup>             | FC:PI |
| 839a | <i>Festuca dalmatica</i><br>(Hack.) K.Richt.                                     | –              | Poaceae <sup>j</sup> | M | 28° | 4  | P | 4,848  | 5-0  | 9-9  | 19-8 | 555 | O | G <sup>c</sup>             | FC:PI |
| 840a | <i>Festuca deflexa</i> Connor                                                    | Yes            | Poaceae <sup>j</sup> | M | 42  | 6  | P | 7,834  | 8-0  | 16-0 | 32-0 | 528 | O | – <sup>w</sup>             | FC:PI |
| 841a | <i>Festuca degenii</i><br>(St-Yves)<br>Markgr.-Dann.                             | –              | Poaceae <sup>j</sup> | M | 28° | 4  | P | 4,924  | 5-0  | 10-1 | 20-1 | 555 | O | G <sup>c</sup>             | FC:PI |
| 842a | <i>Festuca drymeia</i> Mert. &<br>Koch                                           | –              | Poaceae <sup>j</sup> | M | 14° | 2  | P | 4,783  | 4-9  | 9-8  | 19-6 | 555 | O | G <sup>c</sup>             | FC:PI |
| 843a | <i>Festuca durandoi</i> (Hack.)<br>Rivas Ponce & Cebolla<br>var. <i>livida</i>   | –              | Poaceae <sup>j</sup> | M | 28° | 4  | P | 7,169  | 7-3  | 14-7 | 29-3 | 555 | O | G <sup>c</sup>             | FC:PI |
| 844a | <i>Festuca duriotagana</i><br>Franco & Rocha<br>Afonso                           | –              | Poaceae <sup>j</sup> | M | 70  | 10 | P | 9,917  | 10-1 | 20-3 | 40-6 | 555 | O | G <sup>c</sup>             | FC:PI |
| 844b | <i>Festuca duriotagana</i><br>Franco & Rocha<br>Afonso var. <i>barbata</i>       | Yes            | Poaceae <sup>j</sup> | M | 70  | 10 | P | 10,103 | 10-3 | 20-7 | 41-3 | 582 | O | G <sup>c</sup>             | FC:PI |
| 845a | <i>Festuca duvalii</i> (St-Yves)<br>Stohr                                        | –              | Poaceae <sup>j</sup> | M | 28° | 4  | P | 4,958  | 5-1  | 10-1 | 20-3 | 555 | O | G <sup>c</sup>             | FC:PI |
| 846a | <i>Festuca eglei</i> R.Tracey                                                    | –              | Poaceae <sup>j</sup> | M | 14° | 2  | P | 2,375  | 2-4  | 4-9  | 9-7  | 555 | O | G <sup>c</sup>             | FC:PI |
| 847a | <i>Festuca elegans</i> Boiss.<br>subsp. <i>merinoi</i> (Pau)<br>Fuente & Ortúñez | Yes            | Poaceae <sup>j</sup> | M | 28° | 4  | P | 6,020  | 6-2  | 12-3 | 24-6 | 582 | O | G <sup>c</sup>             | FC:PI |
| 848a | <i>Festuca exaltata</i> C.Presl                                                  | –              | Poaceae <sup>j</sup> | M | 14° | 2  | P | 4,756  | 4-9  | 9-7  | 19-5 | 555 | O | G <sup>c</sup>             | FC:PI |

Continued

| Entry number <sup>g</sup> | Species                                                                              | Voucher        | Family               | Higher group <sup>h</sup> | 2n <sup>z</sup> | Ploidy level (x) | Life cycle type <sup>s</sup> | DNA amount             |         |         |         | Original ref. <sup>a</sup> | Present amount <sup>†</sup> | Standard species <sup>*b1</sup> | Method <sup>††</sup> |
|---------------------------|--------------------------------------------------------------------------------------|----------------|----------------------|---------------------------|-----------------|------------------|------------------------------|------------------------|---------|---------|---------|----------------------------|-----------------------------|---------------------------------|----------------------|
|                           |                                                                                      |                |                      |                           |                 |                  |                              | 1C (Mbp <sup>o</sup> ) | 1C (pg) | 2C (pg) | 4C (pg) |                            |                             |                                 |                      |
| 849a                      | <i>Festuca extremiorientalis</i> Ohwi                                                | –              | Poaceae <sup>j</sup> | M                         | 28 <sup>o</sup> | 4                | P                            | 6,587                  | 6.7     | 13.5    | 26.9    | 555                        | O                           | G <sup>c</sup>                  | FC:PI                |
| 850a                      | <i>Festuca filiformis</i> Pourr.                                                     | –              | Poaceae <sup>j</sup> | M                         | 14 <sup>o</sup> | 2                | P                            | 2,451                  | 2.5     | 5.0     | 10.0    | 555                        | O                           | G <sup>c</sup>                  | FC:PI                |
| 850b                      | <i>Festuca filiformis</i> Pourr.                                                     | No             | Poaceae <sup>j</sup> | M                         | 14              | 2                | P                            | 2,367                  | 2.4     | 4.8     | 9.7     | 609                        | O                           | G <sup>c</sup>                  | FC:PI                |
| 851a                      | <i>Festuca gamisansii</i> Kerguelén subsp. <i>aethaliae</i> Signorini & Foggi        | –              | Poaceae <sup>j</sup> | M                         | 70              | 10               | P                            | 11,775                 | 12.0    | 24.1    | 48.2    | 555                        | O                           | G <sup>c</sup>                  | FC:PI                |
| 852a                      | <i>Festuca gautieri</i> Kerguelén subsp. <i>scoparia</i> (A.Kern. & Hack.) Kerguelén | –              | Poaceae <sup>j</sup> | M                         | 14 <sup>o</sup> | 2                | P                            | 2,991                  | 3.1     | 6.1     | 12.2    | 555                        | O                           | G <sup>c</sup>                  | FC:PI                |
| 853a                      | <i>Festuca gigantea</i> (L.) Vill.                                                   | –              | Poaceae <sup>j</sup> | M                         | 42 <sup>o</sup> | 6                | P                            | 10,147                 | 10.4    | 20.8    | 41.5    | 555                        | O                           | G <sup>c</sup>                  | FC:PI                |
| 854a                      | <i>Festuca glauca</i> Vill.                                                          | –              | Poaceae <sup>j</sup> | M                         | 42 <sup>o</sup> | 6                | P                            | 6,954                  | 7.1     | 14.2    | 28.4    | 555                        | O                           | G <sup>c</sup>                  | FC:PI                |
| 855a                      | <i>Festuca guestfalica</i> Reichenb.                                                 | –              | Poaceae <sup>j</sup> | M                         | 28 <sup>o</sup> | 4                | P                            | 4,782                  | 4.9     | 9.8     | 19.6    | 555                        | O                           | G <sup>c</sup>                  | FC:PI                |
| 856a                      | <i>Festuca guinochetii</i> (Bidault) S.Arndt.                                        | –              | Poaceae <sup>j</sup> | M                         | 70 <sup>o</sup> | 10               | P                            | 11,208                 | 11.5    | 22.9    | 45.8    | 555                        | O                           | G <sup>c</sup>                  | FC:PI                |
| 857a                      | <i>Festuca hallerii</i> All. <sup>1</sup>                                            | –              | Poaceae <sup>j</sup> | M                         | 14 <sup>o</sup> | 2                | P                            | 2,643                  | 2.7     | 5.4     | 10.8    | 555                        | O                           | G <sup>c</sup>                  | FC:PI                |
| 858a                      | <i>Festuca henriquesii</i> Hack.                                                     | Yes            | Poaceae <sup>j</sup> | M                         | 14              | 2                | P                            | 2,866                  | 2.9     | 5.9     | 11.7    | 582                        | O                           | G <sup>c</sup>                  | FC:PI                |
| 859a                      | <i>Festuca heteromalla</i> Pourr.                                                    | –              | Poaceae <sup>j</sup> | M                         | 56 <sup>o</sup> | 8                | P                            | 8,015                  | 8.2     | 16.4    | 32.8    | 555                        | O                           | G <sup>c</sup>                  | FC:PI                |
| 860a                      | <i>Festuca heteropachys</i> (St-Yves) Auquier                                        | –              | Poaceae <sup>j</sup> | M                         | 28 <sup>o</sup> | 4                | P                            | 4,810                  | 4.9     | 9.8     | 19.7    | 555                        | O                           | G <sup>c</sup>                  | FC:PI                |
| 861a                      | <i>Festuca heterophylla</i> Lam.                                                     | –              | Poaceae <sup>j</sup> | M                         | 28 <sup>o</sup> | 4                | P                            | 5,535                  | 5.7     | 11.3    | 22.6    | 555                        | O                           | G <sup>c</sup>                  | FC:PI                |
| 862a                      | <i>Festuca hirtovaginata</i> (Acht.) Markgr.-Dann.                                   | –              | Poaceae <sup>j</sup> | M                         | 42 <sup>o</sup> | 6                | P                            | 6,836                  | 7.0     | 14.0    | 28.0    | 555                        | O                           | G <sup>c</sup>                  | FC:PI                |
| 863a                      | <i>Festuca humifusa</i> Brullo & R.Guarino                                           | –              | Poaceae <sup>j</sup> | M                         | 14              | 2                | P                            | 2,559                  | 2.6     | 5.2     | 10.5    | 555                        | O                           | G <sup>c</sup>                  | FC:PI                |
| 864a                      | <i>Festuca idahoensis</i> Elmer                                                      | No             | Poaceae <sup>j</sup> | M                         | 28 <sup>o</sup> | 4                | P                            | 5,027                  | 5.1     | 10.3    | 20.6    | 609                        | O                           | G <sup>c</sup>                  | FC:PI                |
| 865a                      | <i>Festuca inops</i> De Not. <sup>1</sup>                                            | – <sup>m</sup> | Poaceae <sup>j</sup> | M                         | 14 <sup>o</sup> | 2                | P                            | 2,381                  | 2.4     | 4.9     | 9.7     | 555                        | O                           | G <sup>c</sup>                  | FC:PI                |
| 866a                      | <i>Festuca laevigata</i> Gaudin <sup>1</sup>                                         | –              | Poaceae <sup>j</sup> | M                         | 56              | 8                | P                            | 9,149                  | 9.4     | 18.7    | 37.4    | 555                        | O                           | G <sup>c</sup>                  | FC:PI                |
| 867a                      | <i>Festuca laxa</i> Host                                                             | – <sup>m</sup> | Poaceae <sup>j</sup> | M                         | 28 <sup>o</sup> | 4                | P                            | 6,323                  | 6.5     | 12.9    | 25.9    | 555                        | O                           | G <sup>c</sup>                  | FC:PI                |
| 868a                      | <i>Festuca lemanii</i> Bast.                                                         | – <sup>m</sup> | Poaceae <sup>j</sup> | M                         | 42 <sup>o</sup> | 6                | P                            | 6,826                  | 7.0     | 14.0    | 27.9    | 555                        | O                           | G <sup>c</sup>                  | FC:PI                |
| 869a                      | <i>Festuca lenensis</i> Drobov <sup>au</sup>                                         | No             | Poaceae <sup>j</sup> | M                         | 14 <sup>o</sup> | 2                | P                            | 2,616                  | 2.7     | 5.4     | 10.7    | 609 <sup>au</sup>          | O                           | G <sup>c</sup>                  | FC:PI                |
| 870a                      | <i>Festuca luciarum</i> Connor                                                       | Yes            | Poaceae <sup>j</sup> | M                         | 56              | 8                | P                            | 9,707                  | 9.9     | 19.9    | 39.7    | 528                        | O                           | – <sup>w</sup>                  | FC:PI                |
| 871a                      | <i>Festuca madida</i> Connor                                                         | Yes            | Poaceae <sup>j</sup> | M                         | 28              | 4                | P                            | 4,743                  | 4.9     | 9.7     | 19.4    | 476                        | O                           | Actinidia <sup>c</sup>          | FC:PI                |
| 872a                      | <i>Festuca malyshevii</i> E.B.Alexeev                                                | – <sup>m</sup> | Poaceae <sup>j</sup> | M                         | 14 <sup>o</sup> | 2                | P                            | 3,416                  | 3.5     | 7.0     | 14.0    | 555                        | O                           | G <sup>c</sup>                  | FC:PI                |
| 873a                      | <i>Festuca matthewsii</i> (Hack.) Cheeseman subsp. <i>matthewsii</i>                 | Yes            | Poaceae <sup>j</sup> | M                         | 42              | 6                | P                            | 7,951                  | 8.1     | 16.3    | 32.5    | 528                        | O                           | – <sup>w</sup>                  | FC:PI                |
| 874a                      | <i>Festuca nigrescens</i> Lam. subsp. <i>microphylla</i> (St-Yves) Markgr.-Dann.     | – <sup>m</sup> | Poaceae <sup>j</sup> | M                         | 42 <sup>o</sup> | 6                | P                            | 6,469                  | 6.6     | 13.2    | 26.5    | 555                        | O                           | G <sup>c</sup>                  | FC:PI                |

|      |                                                                                                            |                |                      |   |                 |                |   |        |      |      |      |     |   |                        |       |
|------|------------------------------------------------------------------------------------------------------------|----------------|----------------------|---|-----------------|----------------|---|--------|------|------|------|-----|---|------------------------|-------|
| 874b | <i>Festuca nigrescens</i> Lam.<br>subsp. <i>nigrescens</i>                                                 | – <sup>m</sup> | Poaceae <sup>j</sup> | M | 42°             | 6              | P | 6,509  | 6-7  | 13-3 | 26-6 | 555 | O | G <sup>c</sup>         | FC:PI |
| 874c | <i>Festuca nigrescens</i> Lam.<br>subsp. <i>microphylla</i><br>(St.-Yves)<br>Markgr.-Dann.                 | Yes            | Poaceae <sup>j</sup> | M | 42 <sup>z</sup> | 6 <sup>z</sup> | P | 6,748  | 6-9  | 13-8 | 27-6 | 582 | O | G <sup>c</sup>         | FC:PI |
| 875a | <i>Festuca norica</i> (Hack.)<br>K.Richt.                                                                  | – <sup>m</sup> | Poaceae <sup>j</sup> | M | 14°             | 2              | P | 3,018  | 3-1  | 6-2  | 12-3 | 555 | O | G <sup>c</sup>         | FC:PI |
| 876a | <i>Festuca novae-zelandiae</i><br>(Hack.) Cockayne                                                         | Yes            | Poaceae <sup>j</sup> | M | 42              | 6              | P | 8,230  | 8-4  | 16-8 | 33-7 | 528 | O | – <sup>w</sup>         | FC:PI |
| 876b | <i>Festuca novae-zelandiae</i><br>(Hack.) Cockayne <sup>i</sup>                                            | Yes            | Poaceae <sup>j</sup> | M | 42              | 6              | P | 4,792  | 4-9  | 9-8  | 19-6 | 476 | O | Actinidia <sup>c</sup> | FC:PI |
| 877a | <i>Festuca ovina</i> L.                                                                                    | – <sup>m</sup> | Poaceae <sup>j</sup> | M | 14°             | 2              | P | 2,359  | 2-4  | 4-8  | 9-7  | 555 | O | G <sup>c</sup>         | FC:PI |
| 878c | <i>Festuca ovina</i> L. subsp.<br><i>hirtula</i> (Hackel ex<br>Travis) Wilkinson                           | No             | Poaceae <sup>j</sup> | M | 28              | 4              | P | 4,455  | 4-6  | 9-1  | 18-2 | 609 | O | Gallus <sup>f</sup>    | FC:PI |
| 879a | <i>Festuca pallens</i> Host                                                                                | – <sup>m</sup> | Poaceae <sup>j</sup> | M | 14              | 2              | P | 2,474  | 2-5  | 5-1  | 10-1 | 555 | O | G <sup>c</sup>         | FC:PI |
| 880a | <i>Festuca paniculata</i> (L.)<br>Schinz & Thell. subsp.<br><i>paniculata</i>                              | – <sup>m</sup> | Poaceae <sup>j</sup> | M | 14°             | 2              | P | 3,739  | 3-8  | 7-6  | 15-3 | 555 | O | G <sup>c</sup>         | FC:PI |
| 881a | <i>Festuca paniculata</i> (L.)<br>Schinz & Thell. subsp.<br><i>multispiculata</i> Rivas<br>Ponce & Cebolla | Yes            | Poaceae <sup>j</sup> | M | 28              | 4              | P | 7,345  | 7-5  | 15-0 | 30-0 | 582 | O | G <sup>c</sup>         | FC:PI |
| 882a | <i>Festuca picturata</i> Pils                                                                              | – <sup>m</sup> | Poaceae <sup>j</sup> | M | 14°             | 2              | P | 2,841  | 2-9  | 5-8  | 11-6 | 555 | O | G <sup>c</sup>         | FC:PI |
| 883a | <i>Festuca pirinica</i><br>Markgr.-Dann.                                                                   | – <sup>m</sup> | Poaceae <sup>j</sup> | M | 14°             | 2              | P | 2,569  | 2-6  | 5-3  | 10-5 | 555 | O | G <sup>c</sup>         | FC:PI |
| 884a | <i>Festuca polesica</i> Zapal.                                                                             | – <sup>m</sup> | Poaceae <sup>j</sup> | M | 14°             | 2              | P | 2,541  | 2-6  | 5-2  | 10-4 | 555 | O | G <sup>c</sup>         | FC:PI |
| 884d | <i>Festuca pratensis</i> Huds.<br>subsp. <i>pratensis</i>                                                  | – <sup>m</sup> | Poaceae <sup>j</sup> | M | 14°             | 2              | P | 3,165  | 3-2  | 6-5  | 12-9 | 555 | O | G <sup>c</sup>         | FC:PI |
| 885a | <i>Festuca psammophila</i><br>(Čelak.) Fritsch subsp.<br><i>dominii</i> (Krajina)<br>P.Šmarda              | – <sup>m</sup> | Poaceae <sup>j</sup> | M | 14              | 2              | P | 2,405  | 2-5  | 4-9  | 9-8  | 555 | O | G <sup>c</sup>         | FC:PI |
| 885b | <i>Festuca psammophila</i><br>(Čelak.) Fritsch subsp.<br><i>psammophila</i>                                | – <sup>m</sup> | Poaceae <sup>j</sup> | M | 14°             | 2              | P | 2,536  | 2-6  | 5-2  | 10-4 | 555 | O | G <sup>c</sup>         | FC:PI |
| 886a | <i>Festuca pseudodalmatica</i><br>Domin                                                                    | – <sup>m</sup> | Poaceae <sup>j</sup> | M | 28°             | 4              | P | 4,720  | 4-8  | 9-7  | 19-3 | 555 | O | G <sup>c</sup>         | FC:PI |
| 887a | <i>Festuca pseudovaginata</i><br>Penksza                                                                   | – <sup>m</sup> | Poaceae <sup>j</sup> | M | 28°             | 4              | P | 4,812  | 4-9  | 9-8  | 19-7 | 555 | O | G <sup>c</sup>         | FC:PI |
| 888a | <i>Festuca pseudovaria</i><br>Hackel ex Wiesb<br>subsp. <i>winnebachensis</i><br>(Wallosek) J.Müller       | – <sup>m</sup> | Poaceae <sup>j</sup> | M | 42°             | 6              | P | 9,271  | 9-5  | 19-0 | 37-9 | 555 | O | G <sup>c</sup>         | FC:PI |
| 889a | <i>Festuca pseudovina</i><br>Wiesb.                                                                        | – <sup>m</sup> | Poaceae <sup>j</sup> | M | 14°             | 2              | P | 2,157  | 2-2  | 4-4  | 8-8  | 555 | O | G <sup>c</sup>         | FC:PI |
| 889b | <i>Festuca pseudovina</i><br>Hackel ex Wiesb                                                               | No             | Poaceae <sup>j</sup> | M | 14              | 2              | P | 2,147  | 2-2  | 4-4  | 8-8  | 609 | O | Gallus <sup>f</sup>    | FC:PI |
| 890a | <i>Festuca pumila</i> Vill. <sup>i</sup>                                                                   | – <sup>m</sup> | Poaceae <sup>j</sup> | M | 14°             | 2              | P | 3,379  | 3-5  | 6-9  | 13-8 | 555 | O | G <sup>c</sup>         | FC:PI |
| 891a | <i>Festuca riccerii</i> Foggì &<br>Gr.Rossi                                                                | – <sup>m</sup> | Poaceae <sup>j</sup> | M | 42°             | 6              | P | 6,870  | 7-0  | 14-1 | 28-1 | 555 | O | G <sup>c</sup>         | FC:PI |
| 892a | <i>Festuca riloensis</i> (Hayek)<br>Markgr.-Dann.                                                          | –              | Poaceae <sup>j</sup> | M | 14°             | 2              | P | 2,773  | 2-8  | 5-7  | 11-3 | 555 | O | G <sup>c</sup>         | FC:PI |
| 893a | <i>Festuca robustifolia</i><br>Markgr.-Dann.                                                               | – <sup>m</sup> | Poaceae <sup>j</sup> | M | 70              | 10             | P | 10,900 | 11-1 | 22-3 | 44-6 | 555 | O | G <sup>c</sup>         | FC:PI |

Continued

| Entry number <sup>e</sup> | Species                                                                                       | Voucher        | Family               | Higher group <sup>#</sup> | 2n <sup>‡</sup> | Ploidy level (x) | Life cycle type <sup>§</sup> | DNA amount             |         |         |         | Original ref. <sup>a</sup> | Present amount <sup>†</sup> | Standard species <sup>*b1</sup> | Method <sup>††</sup> |
|---------------------------|-----------------------------------------------------------------------------------------------|----------------|----------------------|---------------------------|-----------------|------------------|------------------------------|------------------------|---------|---------|---------|----------------------------|-----------------------------|---------------------------------|----------------------|
|                           |                                                                                               |                |                      |                           |                 |                  |                              | 1C (Mbp <sup>b</sup> ) | 1C (pg) | 2C (pg) | 4C (pg) |                            |                             |                                 |                      |
| 894a                      | <i>Festuca rothmaleri</i> (Litard.) Markgr.-Dann                                              | Yes            | Poaceae <sup>i</sup> | M                         | 42 <sup>z</sup> | 6 <sup>z</sup>   | P                            | 6,680                  | 6.8     | 13.7    | 27.3    | 582                        | O                           | G <sup>c</sup>                  | FC:PI                |
| 895c                      | <i>Festuca rubra</i> L. subsp. <i>rubra</i>                                                   | – <sup>m</sup> | Poaceae <sup>i</sup> | M                         | 42 <sup>o</sup> | 6                | P                            | 6,690                  | 6.8     | 13.7    | 27.4    | 555                        | O                           | G <sup>c</sup>                  | FC:PI                |
| 895e                      | <i>Festuca rubra</i> L. subsp. <i>pruinosa</i> (Hack.) Piper                                  | Yes            | Poaceae <sup>i</sup> | M                         | 42              | 6                | P                            | 6,205                  | 6.3     | 12.7    | 25.4    | 582                        | O                           | G <sup>c</sup>                  | FC:PI                |
| 895f                      | <i>Festuca rubra</i> L. subsp. <i>litoralis</i> (G.F.W. Meyer) Auquier                        | Yes            | Poaceae <sup>i</sup> | M                         | 42              | 6                | P                            | 6,450                  | 6.6     | 13.2    | 26.4    | 582                        | O                           | G <sup>c</sup>                  | FC:PI                |
| 895g                      | <i>Festuca rubra</i> L. var. <i>littoralis</i> Vasey                                          | No             | Poaceae <sup>i</sup> | M                         | 42              | 6                | P                            | 5,325                  | 5.4     | 10.9    | 21.8    | 609                        | O                           | <i>Gallus</i> <sup>f</sup>      | FC:PI                |
| 895h                      | <i>Festuca rubra</i> L. subsp. <i>fallax</i> (Thuill.) Nyman                                  | No             | Poaceae <sup>i</sup> | M                         | 42              | 6                | P                            | 5,824                  | 6.0     | 11.9    | 23.8    | 609                        | O                           | <i>Gallus</i> <sup>f</sup>      | FC:PI                |
| 895s                      | <i>Festuca rubra</i> L. subsp. <i>pruinosa</i> (Hack.) Piper                                  | – <sup>m</sup> | Poaceae <sup>i</sup> | M                         | 42              | 6                | P                            | 6,303                  | 6.4     | 12.9    | 25.8    | 555                        | O                           | G <sup>c</sup>                  | FC:PI                |
| 896a                      | <i>Festuca rubra</i> L. subsp. <i>juncea</i> (Hack.) K.Richt                                  | – <sup>m</sup> | Poaceae <sup>i</sup> | M                         | 56 <sup>o</sup> | 8                | P                            | 8,298                  | 8.5     | 17.0    | 33.9    | 555                        | O                           | G <sup>c</sup>                  | FC:PI                |
| 896b                      | <i>Festuca rubra</i> L. subsp. <i>rubra</i>                                                   | Yes            | Poaceae <sup>i</sup> | M                         | 56 <sup>z</sup> | 8 <sup>z</sup>   | P                            | 8,636                  | 8.8     | 17.7    | 35.3    | 582                        | O                           | G <sup>c</sup>                  | FC:PI                |
| 896c                      | <i>Festuca rubra</i> L. subsp. <i>rubra</i>                                                   | No             | Poaceae <sup>i</sup> | M                         | 56              | 8                | P                            | 6,978                  | 7.1     | 14.3    | 28.5    | 609                        | O                           | <i>Gallus</i> <sup>f</sup>      | FC:PI                |
| 897a                      | <i>Festuca rupicaprina</i> (Hack.) A.Kern. <sup>i</sup>                                       | – <sup>m</sup> | Poaceae <sup>i</sup> | M                         | 14 <sup>o</sup> | 2                | P                            | 2,428                  | 2.5     | 5.0     | 9.9     | 555                        | O                           | G <sup>c</sup>                  | FC:PI                |
| 898a                      | <i>Festuca rupicola</i> Heuff.                                                                | – <sup>m</sup> | Poaceae <sup>i</sup> | M                         | 42 <sup>o</sup> | 6                | P                            | 7,110                  | 7.3     | 14.5    | 29.1    | 555                        | O                           | G <sup>c</sup>                  | FC:PI                |
| 899a                      | <i>Festuca saxatilis</i> Schur                                                                | – <sup>m</sup> | Poaceae <sup>i</sup> | M                         | 42 <sup>o</sup> | 6                | P                            | 7,022                  | 7.2     | 14.4    | 28.7    | 555                        | O                           | G <sup>c</sup>                  | FC:PI                |
| 900a                      | <i>Festuca staroplaninica</i> Velčev <sup>i</sup>                                             | – <sup>m</sup> | Poaceae <sup>i</sup> | M                         | 42 <sup>o</sup> | 6                | P                            | 6,763                  | 6.9     | 13.8    | 27.7    | 555                        | O                           | G <sup>c</sup>                  | FC:PI                |
| 901a                      | <i>Festuca stenantha</i> (Hack.) K.Richt.                                                     | – <sup>m</sup> | Poaceae <sup>i</sup> | M                         | 14 <sup>o</sup> | 2                | P                            | 2,634                  | 2.7     | 5.4     | 10.8    | 555                        | O                           | G <sup>c</sup>                  | FC:PI                |
| 902a                      | <i>Festuca stricta</i> Host subsp. <i>stricta</i>                                             | – <sup>m</sup> | Poaceae <sup>i</sup> | M                         | 42 <sup>o</sup> | 6                | P                            | 6,870                  | 7.0     | 14.1    | 28.1    | 555                        | O                           | G <sup>c</sup>                  | FC:PI                |
| 903a                      | <i>Festuca stricta</i> Host subsp. <i>bauzanina</i> Pils                                      | – <sup>m</sup> | Poaceae <sup>i</sup> | M                         | 56 <sup>o</sup> | 8                | P                            | 9,037                  | 9.2     | 18.5    | 37.0    | 555                        | O                           | G <sup>c</sup>                  | FC:PI                |
| 904a                      | <i>Festuca summilusitana</i> Franco & Rocha Afonso                                            | – <sup>m</sup> | Poaceae <sup>i</sup> | M                         | 70              | 10               | P                            | 10,675                 | 10.9    | 21.8    | 43.7    | 555                        | O                           | G <sup>c</sup>                  | FC:PI                |
| 904b                      | <i>Festuca summilusitana</i> Franco & Rocha Afonso                                            | Yes            | Poaceae <sup>i</sup> | M                         | 70              | 10               | P                            | 11,095                 | 11.3    | 22.7    | 45.4    | 582                        | O                           | G <sup>c</sup>                  | FC:PI                |
| 905a                      | <i>Festuca summilusitana</i> Franco & Rocha Afonso                                            | Yes            | Poaceae <sup>i</sup> | M                         | 84              | 12               | P                            | 12,553                 | 12.8    | 25.7    | 51.3    | 582                        | O                           | G <sup>c</sup>                  | FC:PI                |
| 906a                      | <i>Festuca supina</i> Schur                                                                   | – <sup>m</sup> | Poaceae <sup>i</sup> | M                         | 28 <sup>o</sup> | 4                | P                            | 4,849                  | 5.0     | 9.9     | 19.8    | 555                        | O                           | G <sup>c</sup>                  | FC:PI                |
| 907a                      | <i>Festuca tatrae</i> (Csakó) Degen                                                           | –              | Poaceae <sup>i</sup> | M                         | 14 <sup>o</sup> | 2                | P                            | 3,422                  | 3.5     | 7.0     | 14.0    | 555                        | O                           | G <sup>c</sup>                  | FC:PI                |
| 908a                      | <i>Festuca trichophylla</i> (Gaudin) K.Richt. subsp. <i>asperifolia</i> (St.-Yves) Al-Bermani | – <sup>m</sup> | Poaceae <sup>i</sup> | M                         | 42 <sup>o</sup> | 6                | P                            | 6,411                  | 6.6     | 13.1    | 26.2    | 555                        | O                           | G <sup>c</sup>                  | FC:PI                |



|      |                                                                                  |                |                           |   |                |                |                |        |      |       |       |     |   |                              |       |
|------|----------------------------------------------------------------------------------|----------------|---------------------------|---|----------------|----------------|----------------|--------|------|-------|-------|-----|---|------------------------------|-------|
| 908b | <i>Festuca trichophylla</i> (Gaudin) K.Richt. subsp. <i>trichophylla</i>         | – <sup>m</sup> | Poaceae <sup>j</sup>      | M | 42°            | 6              | P              | 6,460  | 6-6  | 13-2  | 26-4  | 555 | O | G <sup>c</sup>               | FC:PI |
| 909a | <i>Festuca tristis</i> Krylov & Ivanitzky                                        | – <sup>m</sup> | Poaceae <sup>j</sup>      | M | 28°            | 4              | P              | 6,318  | 6-5  | 12-9  | 25-8  | 555 | O | G <sup>c</sup>               | FC:PI |
| 910a | <i>Festuca ultramafica</i> Connor                                                | Yes            | Poaceae <sup>j</sup>      | M | 56             | 8              | P              | 10,083 | 10-3 | 20-6  | 41-2  | 528 | O | – <sup>w</sup>               | FC:PI |
| 911a | <i>Festuca vaginata</i> Willd.                                                   | – <sup>m</sup> | Poaceae <sup>j</sup>      | M | 14°            | 2              | P              | 2,397  | 2-5  | 4-9   | 9-8   | 555 | O | G <sup>c</sup>               | FC:PI |
| 912a | <i>Festuca valesiaca</i> Gaudin                                                  | – <sup>m</sup> | Poaceae <sup>j</sup>      | M | 14°            | 2              | P              | 2,226  | 2-3  | 4-6   | 9-1   | 555 | O | G <sup>c</sup>               | FC:PI |
| 913a | <i>Festuca valida</i> (Uechtr.) Penzès subsp. <i>valida</i> <sup>i</sup>         | – <sup>m</sup> | Poaceae <sup>j</sup>      | M | 28°            | 4              | P              | 8,817  | 9-0  | 18-0  | 36-1  | 555 | O | G <sup>c</sup>               | FC:PI |
| 914a | <i>Festuca versicolor</i> Tausch subsp. <i>pallidula</i> (Hack.) Markgr.-Dann.   | – <sup>m</sup> | Poaceae <sup>j</sup>      | M | 14°            | 2              | P              | 3,477  | 3-6  | 7-1   | 14-2  | 555 | O | G <sup>c</sup>               | FC:PI |
| 914b | <i>Festuca versicolor</i> Tausch subsp. <i>versicolor</i>                        | – <sup>m</sup> | Poaceae <sup>j</sup>      | M | 14°            | 2              | P              | 3,591  | 3-7  | 7-3   | 14-7  | 555 | O | G <sup>c</sup>               | FC:PI |
| 914c | <i>Festuca versicolor</i> Tausch subsp. <i>brachystachys</i> (Hack.) Markg.-Dann | – <sup>m</sup> | Poaceae <sup>j</sup>      | M | 14°            | 2              | P              | 3,779  | 3-9  | 7-7   | 15-5  | 555 | O | G <sup>c</sup>               | FC:PI |
| 915a | <i>Festuca violacea</i> subsp. <i>italica</i> Foggi, Gr.Rossi & Signorini        | – <sup>m</sup> | Poaceae <sup>j</sup>      | M | 14°            | 2              | P              | 2,511  | 2-6  | 5-1   | 10-3  | 555 | O | G <sup>c</sup>               | FC:PI |
| 916a | <i>Festuca vivipara</i> (L.) Sm.                                                 | – <sup>m</sup> | Poaceae <sup>j</sup>      | M | 28°            | 4              | P              | 4,852  | 5-0  | 9-9   | 19-8  | 555 | O | G <sup>c</sup>               | FC:PI |
| 917a | <i>Festuca wagneri</i> (Degen, Thaisz & Flatt) Degen, Thaisz & Flatt             | – <sup>m</sup> | Poaceae <sup>j</sup>      | M | 28°            | 4              | P              | 4,643  | 4-7  | 9-5   | 19-0  | 555 | O | G <sup>c</sup>               | FC:PI |
| 918a | <i>Festuca xanthina</i> Roem. & Schult.                                          | – <sup>m</sup> | Poaceae <sup>j</sup>      | M | 14°            | 2              | P              | 3,902  | 4-0  | 8-0   | 16-0  | 555 | O | G <sup>c</sup>               | FC:PI |
| 919a | <i>Fibigia clypeata</i> Medik.                                                   | Yes            | Brassicaceae <sup>j</sup> | E | 16             | 2              | – <sup>q</sup> | 1,223  | 1-3  | 2-5   | 5-0   | 599 | O | L                            | FC:PI |
| 920a | <i>Fibigia eriocarpa</i> Boiss.                                                  | Yes            | Brassicaceae <sup>j</sup> | E | 16             | 2              | – <sup>q</sup> | 1,262  | 1-3  | 2-6   | 5-2   | 599 | O | L                            | FC:PI |
| 921a | <i>Ficus carica</i> L.                                                           | No             | Moraceae                  | E | – <sup>n</sup> | – <sup>p</sup> | P              | 357    | 0-4  | 0-7   | 1-5   | 563 | O | <i>Solan.</i> <sup>c</sup>   | FC:PI |
| 922a | <i>Filifolium sibiricum</i> (L.) Kitam.                                          | Yes            | Asteraceae <sup>j</sup>   | E | 18             | 2              | P              | 4,616  | 4-7  | 9-4   | 18-9  | 521 | O | <i>Petunia</i> <sup>e</sup>  | FC:PI |
| 923a | <i>Forsskaolea angustifolia</i> Retz.                                            | – <sup>m</sup> | Urticaceae                | E | 22°            | 2              | P              | 313    | 0-3  | 0-6   | 1-3   | 477 | O | <i>Raphanus</i> <sup>e</sup> | FC:PI |
| 924a | <i>Fosterella penduliflora</i> (C.H.Wright) L.B.Sm.                              | Yes            | Bromeliaceae              | M | – <sup>n</sup> | – <sup>p</sup> | P              | 910    | 0-9  | 1-9   | 3-7   | 575 | O | <i>Raphanus</i> <sup>e</sup> | FC:PI |
| 925a | <i>Fosterella villosula</i> (Harms) L.B.Sm.                                      | Yes            | Bromeliaceae              | M | – <sup>n</sup> | – <sup>p</sup> | P              | 910    | 0-9  | 1-9   | 3-7   | 575 | O | <i>Raphanus</i> <sup>e</sup> | FC:PI |
| 926a | <i>Frangula alnus</i> Miller                                                     | Yes            | Rhamnaceae                | E | – <sup>n</sup> | – <sup>p</sup> | P              | 528    | 0-5  | 1-1   | 2-2   | 489 | O | – <sup>w</sup>               | FC:EB |
| 927a | <i>Frankenia</i> sp.                                                             | Yes            | Frankeniaceae             | E | c. 28          | – <sup>p</sup> | – <sup>q</sup> | 313    | 0-3  | 0-6   | 1-3   | 612 | O | J                            | Fe    |
| 928a | <i>Fraxinus angustifolia</i> Vahl <sup>i</sup>                                   | Yes            | Oleaceae                  | E | – <sup>n</sup> | – <sup>p</sup> | P              | 870    | 0-9  | 1-8   | 3-6   | 489 | O | – <sup>w</sup>               | FC:EB |
| 929a | <i>Fritillaria acmopetala</i> Boiss.                                             | No             | Liliaceae                 | M | 24°            | 2              | P              | 64,793 | 66-3 | 132-5 | 265-0 | 616 | O | <i>Haem.</i> <sup>c</sup>    | FC:PI |
| 930a | <i>Fritillaria affinis</i> (Schult.) Sealy                                       | Yes            | Liliaceae                 | M | c. 24          | 2              | P              | 44,621 | 45-6 | 91-3  | 182-5 | 565 | O | B                            | Fe    |
| 931a | <i>Fritillaria alfredae</i> Post subsp. <i>glaucoviridis</i>                     | Yes            | Liliaceae                 | M | c. 24          | 2              | P              | 55,844 | 57-1 | 114-2 | 228-4 | 565 | O | B                            | Fe    |
| 932a | <i>Fritillaria assyriaca</i> Baker subsp. <i>melanantha</i>                      | Yes            | Liliaceae                 | M | c. 24          | 2              | P              | 52,225 | 53-4 | 106-8 | 213-6 | 565 | O | B                            | Fe    |
| 932b | <i>Fritillaria assyriaca</i> <sup>1</sup>                                        | No             | Liliaceae                 | M | 24°            | 2              | P              | 65,526 | 67-0 | 134-0 | 268-0 | 616 | O | <i>Haem.</i> <sup>c</sup>    | FC:PI |

Continued

| Entry number <sup>g</sup> | Species                                           | Voucher | Family    | Higher group <sup>#</sup> | 2n <sup>‡</sup> | Ploidy level (x) | Life cycle type <sup>§</sup> | DNA amount             |                |         |         | Original ref. <sup>a</sup> | Present amount <sup>†</sup> | Standard species <sup>*b1</sup> | Method <sup>††</sup> |
|---------------------------|---------------------------------------------------|---------|-----------|---------------------------|-----------------|------------------|------------------------------|------------------------|----------------|---------|---------|----------------------------|-----------------------------|---------------------------------|----------------------|
|                           |                                                   |         |           |                           |                 |                  |                              | 1C (Mbp <sup>b</sup> ) | 1C (pg)        | 2C (pg) | 4C (pg) |                            |                             |                                 |                      |
| 933a                      | <i>Fritillaria assyriaca</i> Baker                | Yes     | Liliaceae | M                         | c. 36           | 3                | P                            | – <sup>t</sup>         | – <sup>t</sup> | 155.1   | 310.2   | 565                        | O                           | B                               | Fe                   |
| 934a                      | <i>Fritillaria camschatcensis</i> (L.) Ker Gawl.  | Yes     | Liliaceae | M                         | c. 36           | 3                | P                            | – <sup>t</sup>         | – <sup>t</sup> | 112.3   | 224.5   | 565                        | O                           | B                               | Fe                   |
| 934b                      | <i>Fritillaria camschatcensis</i> (L.) Ker Gawl.  | No      | Liliaceae | M                         | 36              | 3                | P                            | – <sup>t</sup>         | – <sup>t</sup> | 101.6   | 203.3   | 570                        | O                           | A <sup>c</sup>                  | FC:PI                |
| 935a                      | <i>Fritillaria crassifolia</i> Boiss. & Huet      | No      | Liliaceae | M                         | 24 <sup>o</sup> | 2                | P                            | 65,086                 | 66.6           | 133.1   | 266.2   | 616                        | O                           | Haem. <sup>c</sup>              | FC:PI                |
| 936a                      | <i>Fritillaria davidii</i> Franch.                | Yes     | Liliaceae | M                         | c. 24           | 2                | P                            | 30,440                 | 31.1           | 62.3    | 124.5   | 565                        | O                           | B                               | Fe                   |
| 937a                      | <i>Fritillaria davisii</i> Turrill                | No      | Liliaceae | M                         | 24 <sup>o</sup> | 2                | P                            | 67,922                 | 69.5           | 138.9   | 277.8   | 616                        | O                           | Haem. <sup>c</sup>              | FC:PI                |
| 938a                      | <i>Fritillaria eastwoodiae</i> Macfarl.           | Yes     | Liliaceae | M                         | 20-24           | 2                | P                            | 47,555                 | 48.6           | 97.3    | 194.5   | 565                        | O                           | B                               | Fe                   |
| 939a                      | <i>Fritillaria elwesii</i> Bossi.                 | No      | Liliaceae | M                         | – <sup>n</sup>  | – <sup>p</sup>   | P                            | 101,370                | 103.7          | 207.3   | 414.6   | 616                        | O                           | Haem. <sup>c</sup>              | FC:PI                |
| 940a                      | <i>Fritillaria gibbosa</i> Boiss.                 | Yes     | Liliaceae | M                         | c. 24           | 2                | P                            | 41,516                 | 42.5           | 84.9    | 169.8   | 565                        | O                           | B                               | Fe                   |
| 941a                      | <i>Fritillaria glauca</i> Greene                  | Yes     | Liliaceae | M                         | c. 26           | 2                | P                            | 47,800                 | 48.9           | 97.8    | 195.5   | 565                        | O                           | B                               | Fe                   |
| 941c                      | <i>Fritillaria glauca</i> Greene                  | No      | Liliaceae | M                         | 24 <sup>o</sup> | 2                | P                            | 54,621                 | 55.9           | 111.7   | 223.4   | 616                        | O                           | Haem. <sup>c</sup>              | FC:PI                |
| 942a                      | <i>Fritillaria gussichae</i> (Degen & Dorfl.) Rix | Yes     | Liliaceae | M                         | 24              | 2                | P                            | 48,362                 | 49.5           | 98.9    | 197.8   | 565                        | O                           | B                               | Fe                   |
| 943a                      | <i>Fritillaria imperialis</i> L.                  | Yes     | Liliaceae | M                         | 24              | 2                | P                            | 42,005                 | 43.0           | 85.9    | 171.8   | 565                        | O                           | B                               | Fe                   |
| 943b                      | <i>Fritillaria imperialis</i> L. cv. Maxima Lutea | Yes     | Liliaceae | M                         | 24 + 4B         | 2                | P                            | 46,333                 | 47.4           | 94.8    | 189.5   | 565                        | O                           | B                               | Fe                   |
| 943c                      | <i>Fritillaria imperialis</i> L.                  | No      | Liliaceae | M                         | 24 <sup>o</sup> | 2                | P                            | 50,123                 | 51.3           | 102.5   | 205.0   | 616                        | O                           | Haem. <sup>c</sup>              | FC:PI                |
| 943d                      | <i>Fritillaria imperialis</i> L. cv. Maxima       | No      | Liliaceae | M                         | – <sup>n</sup>  | – <sup>p</sup>   | P                            | 97,898                 | 100.1          | 200.2   | 400.4   | 616                        | O                           | Haem. <sup>c</sup>              | FC:PI                |
| 944a                      | <i>Fritillaria koidzumiana</i> Ohwi               | Yes     | Liliaceae | M                         | 24              | 2                | P                            | 75,673                 | 77.4           | 154.8   | 309.5   | 565                        | O                           | B                               | Fe                   |
| 945a                      | <i>Fritillaria liliacea</i> Lindl.                | No      | Liliaceae | M                         | 24 <sup>o</sup> | 2                | P                            | 43,814                 | 44.8           | 89.6    | 179.2   | 616                        | O                           | Haem. <sup>c</sup>              | FC:PI                |
| 946a                      | <i>Fritillaria maximowiczii</i> Freyn             | Yes     | Liliaceae | M                         | c. 20-24        | 2                | P                            | 30,074                 | 30.8           | 61.5    | 123.0   | 565                        | O                           | B                               | Fe                   |
| 947a                      | <i>Fritillaria meleagris</i> L.                   | Yes     | Liliaceae | M                         | 24              | 2                | P                            | 46,259                 | 47.3           | 94.6    | 189.2   | 565                        | O                           | B                               | Fe                   |
| 947c                      | <i>Fritillaria meleagris</i> L.                   | No      | Liliaceae | M                         | 24 <sup>o</sup> | 2                | P                            | 54,964                 | 56.2           | 112.4   | 224.8   | 616                        | O                           | Haem. <sup>c</sup>              | FC:PI                |
| 948a                      | <i>Fritillaria olivieri</i> Baker                 | No      | Liliaceae | M                         | 24 <sup>o</sup> | 2                | P                            | 57,262                 | 58.6           | 117.1   | 234.2   | 616                        | O                           | Haem. <sup>c</sup>              | FC:PI                |
| 949a                      | <i>Fritillaria pallidiflora</i> Schrenk           | No      | Liliaceae | M                         | 24 <sup>o</sup> | 2                | P                            | 42,739                 | 43.7           | 87.4    | 174.8   | 616                        | O                           | Haem. <sup>c</sup>              | FC:PI                |
| 950a                      | <i>Fritillaria persica</i> cv. Adiyaman L.        | Yes     | Liliaceae | M                         | 24              | 2                | P                            | 38,998                 | 39.9           | 79.8    | 159.5   | 565                        | O                           | B                               | Fe                   |
| 951a                      | <i>Fritillaria pinardii</i> Boiss.                | No      | Liliaceae | M                         | 24 <sup>o</sup> | 2                | P                            | 64,108                 | 65.6           | 131.1   | 262.2   | 616                        | O                           | Haem. <sup>c</sup>              | FC:PI                |
| 952a                      | <i>Fritillaria pudica</i> (Pursch) Spreng.        | Yes     | Liliaceae | M                         | c. 36           | 3                | P                            | – <sup>t</sup>         | – <sup>t</sup> | 132.8   | 265.5   | 565                        | O                           | B                               | Fe                   |
| 953a                      | <i>Fritillaria pyrenaica</i> L.                   | Yes     | Liliaceae | M                         | c. 24           | 2                | P                            | 39,267                 | 40.2           | 80.3    | 160.6   | 565                        | O                           | B                               | Fe                   |
| 953c                      | <i>Fritillaria pyrenaica</i> L.                   | No      | Liliaceae | M                         | 24 <sup>o</sup> | 2                | P                            | 51,296                 | 52.5           | 104.9   | 209.8   | 616                        | O                           | Haem. <sup>c</sup>              | FC:PI                |
| 954a                      | <i>Fritillaria raddeana</i> Regel                 | No      | Liliaceae | M                         | 24 <sup>o</sup> | 2                | P                            | 44,548                 | 45.6           | 91.1    | 182.2   | 616                        | O                           | Haem. <sup>c</sup>              | FC:PI                |
| 955a                      | <i>Fritillaria rhodocanakis</i> Orph.             | No      | Liliaceae | M                         | 24 <sup>o</sup> | 2                | P                            | 65,966                 | 67.5           | 134.9   | 269.8   | 616                        | O                           | Haem. <sup>c</sup>              | FC:PI                |
| 956a                      | <i>Fritillaria ruthenica</i> Wikst.               | Yes     | Liliaceae | M                         | c. 24           | 2                | P                            | 49,976                 | 51.1           | 102.2   | 204.4   | 565                        | O                           | B                               | Fe                   |

|      |                                                                                 |     |                             |   |                |                |   |                |                |       |       |     |   |                        |       |
|------|---------------------------------------------------------------------------------|-----|-----------------------------|---|----------------|----------------|---|----------------|----------------|-------|-------|-----|---|------------------------|-------|
| 957a | <i>Fritillaria sewerzowii</i> (Regel) Regel                                     | Yes | Liliaceae                   | M | c. 24          | 2              | P | 41,394         | 42.3           | 84.7  | 169.3 | 565 | O | B                      | Fe    |
| 958a | <i>Fritillaria thunbergii</i> Miq.                                              | Yes | Liliaceae                   | M | 24             | 2              | P | 38,020         | 38.9           | 77.8  | 155.5 | 565 | O | B                      | Fe    |
| 959a | <i>Fritillaria tubiformis</i> Gren. & Godr.                                     | Yes | Liliaceae                   | M | c. 24          | 2              | P | 41,321         | 42.3           | 84.5  | 169.0 | 565 | O | B                      | Fe    |
| 960a | <i>Fritillaria tuntasia</i> Heldr. ex Halácsy                                   | Yes | Liliaceae                   | M | c. 24          | 2              | P | 51,321         | 52.5           | 105.0 | 209.9 | 565 | O | B                      | Fe    |
| 960c | <i>Fritillaria tuntasia</i> Heldr. ex Halácsy                                   | No  | Liliaceae                   | M | 24°            | 2              | P | 63,766         | 65.2           | 130.4 | 260.8 | 616 | O | Haem. <sup>c</sup>     | FC:PI |
| 961a | <i>Fritillaria uva-vulpis</i> Rix                                               | Yes | Liliaceae                   | M | 36             | 3              | P | – <sup>t</sup> | – <sup>t</sup> | 178.4 | 356.8 | 565 | O | B                      | Fe    |
| 961b | <i>Fritillaria uva-vulpis</i> Rix                                               | No  | Liliaceae                   | M | – <sup>n</sup> | – <sup>p</sup> | P | 81,076         | 82.9           | 165.8 | 331.6 | 492 | O | B <sup>c</sup>         | FC:PI |
| 961c | <i>Fritillaria uva-vulpis</i> Rix                                               | No  | Liliaceae                   | M | 48°            | 4              | P | 99,707         | 102.0          | 203.9 | 407.8 | 616 | O | Haem. <sup>c</sup>     | FC:PI |
| 962a | <i>Fritillaria verticillata</i> Willd. var. <i>thunbergii</i>                   | No  | Liliaceae                   | M | 24             | 2              | P | 35,827         | 36.6           | 73.3  | 146.5 | 570 | O | A <sup>c</sup>         | FC:PI |
| 962b | <i>Fritillaria verticillata</i> Willd.                                          | No  | Liliaceae                   | M | 24°            | 2              | P | 41,516         | 42.5           | 84.9  | 169.8 | 616 | O | Haem. <sup>c</sup>     | FC:PI |
| 963b | <i>Furcraea selloa</i> K.Koch                                                   | No  | Asparagaceae <sup>k</sup>   | M | 60°            | – <sup>p</sup> | P | 3,716          | 3.8            | 7.6   | 15.2  | 482 | O | Agave sp. <sup>c</sup> | FC:PI |
| 964a | <i>Gagea wilczekii</i> Braun-Blanquet & Maire                                   | Yes | Liliaceae                   | M | – <sup>n</sup> | – <sup>p</sup> | P | 8,484          | 8.7            | 17.4  | 34.7  | 565 | O | G                      | FC:PI |
| 965a | <i>Galanthus alpinus</i> Sosnowsky subsp. <i>alpinus</i> <sup>i</sup>           | Yes | Amaryllidaceae <sup>k</sup> | M | 24°            | 2 <sup>z</sup> | P | 30,416         | 31.1           | 62.2  | 124.4 | 484 | O | Clivia <sup>c</sup>    | FC:PI |
| 966a | <i>Galanthus alpinus</i> Sosnowsky subsp. <i>bortkewitschianus</i> <sup>i</sup> | Yes | Amaryllidaceae <sup>k</sup> | M | 36°            | 3 <sup>z</sup> | P | – <sup>t</sup> | – <sup>t</sup> | 92.6  | 185.2 | 484 | O | Clivia <sup>c</sup>    | FC:PI |
| 967a | <i>Galanthus cilicicus</i> Baker <sup>i</sup>                                   | Yes | Amaryllidaceae <sup>k</sup> | M | 24°            | 2 <sup>z</sup> | P | 32,127         | 32.9           | 65.7  | 131.4 | 484 | O | Clivia <sup>c</sup>    | FC:PI |
| 968a | <i>Galanthus elwesii</i> Hook.f. <sup>i</sup>                                   | Yes | Amaryllidaceae <sup>k</sup> | M | 24°            | 2 <sup>z</sup> | P | 27,042         | 27.7           | 55.3  | 110.6 | 484 | O | Clivia <sup>c</sup>    | FC:PI |
| 968b | <i>Galanthus elwesii</i> Hook.f. var. <i>monostictus</i> <sup>i</sup>           | Yes | Amaryllidaceae <sup>k</sup> | M | 24°            | 2 <sup>z</sup> | P | 28,900         | 29.6           | 59.1  | 118.2 | 484 | O | Clivia <sup>c</sup>    | FC:PI |
| 969a | <i>Galanthus elwesii</i> Hook.f. <sup>i</sup>                                   | Yes | Amaryllidaceae <sup>k</sup> | M | 48°            | 4 <sup>z</sup> | P | 52,127         | 53.3           | 106.6 | 213.2 | 484 | O | Clivia <sup>c</sup>    | FC:PI |
| 969b | <i>Galanthus elwesii</i> Hook.f. var. <i>monostictus</i> ? <sup>i</sup>         | Yes | Amaryllidaceae <sup>k</sup> | M | 48°            | 4 <sup>z</sup> | P | 60,098         | 61.5           | 122.9 | 245.8 | 484 | O | Clivia <sup>c</sup>    | FC:PI |
| 970a | <i>Galanthus elwesii</i> Hook.f.                                                | Yes | Amaryllidaceae <sup>k</sup> | M | 72°            | 6 <sup>z</sup> | P | 76,969         | 78.7           | 157.4 | 314.8 | 484 | O | Clivia <sup>c</sup>    | FC:PI |
| 971a | <i>Galanthus fosteri</i> Baker <sup>i</sup>                                     | Yes | Amaryllidaceae <sup>k</sup> | M | 24°            | 2 <sup>z</sup> | P | 26,895         | 27.5           | 55.0  | 110.0 | 484 | O | Clivia <sup>c</sup>    | FC:PI |
| 972a | <i>Galanthus gracilis</i> Čelak <sup>i</sup>                                    | Yes | Amaryllidaceae <sup>k</sup> | M | 24°            | 2 <sup>z</sup> | P | 26,748         | 27.4           | 54.7  | 109.4 | 484 | O | Clivia <sup>c</sup>    | FC:PI |
| 973a | <i>Galanthus ikariae</i> Baker <sup>i</sup>                                     | Yes | Amaryllidaceae <sup>k</sup> | M | 24°            | 2 <sup>z</sup> | P | 33,594         | 34.4           | 68.7  | 137.4 | 484 | O | Clivia <sup>c</sup>    | FC:PI |
| 974a | <i>Galanthus koenianus</i> Lobin, Brickell & A.P.Davis <sup>i</sup>             | Yes | Amaryllidaceae <sup>k</sup> | M | 24°            | 2 <sup>z</sup> | P | 27,971         | 28.6           | 57.2  | 114.4 | 484 | O | Clivia <sup>c</sup>    | FC:PI |
| 975a | <i>Galanthus krasnovii</i> A.P.Khokhr. <sup>i</sup>                             | Yes | Amaryllidaceae <sup>k</sup> | M | 24°            | 2 <sup>z</sup> | P | 44,157         | 45.2           | 90.3  | 180.6 | 484 | O | Clivia <sup>c</sup>    | FC:PI |
| 976a | <i>Galanthus lagodechianus</i> Kem.-Nath. <sup>i</sup>                          | Yes | Amaryllidaceae <sup>k</sup> | M | 72°            | 6 <sup>z</sup> | P | 80,343         | 82.2           | 164.3 | 328.6 | 484 | O | Clivia <sup>c</sup>    | FC:PI |
| 977a | <i>Galanthus nivalis</i> L. <sup>i</sup>                                        | Yes | Amaryllidaceae <sup>k</sup> | M | 24°            | 2 <sup>z</sup> | P | 35,306         | 36.1           | 72.2  | 144.4 | 484 | O | Clivia <sup>c</sup>    | FC:PI |
| 978a | <i>Galanthus nivalis</i> L.                                                     | Yes | Amaryllidaceae <sup>k</sup> | M | 36°            | 3 <sup>z</sup> | P | – <sup>t</sup> | – <sup>t</sup> | 105.3 | 210.6 | 484 | O | Clivia <sup>c</sup>    | FC:PI |
| 979a | <i>Galanthus peshmenii</i> A.P.Davis & Brickell                                 | Yes | Amaryllidaceae <sup>k</sup> | M | 24°            | 2 <sup>z</sup> | P | 27,580         | 28.2           | 56.4  | 112.8 | 484 | O | Clivia <sup>c</sup>    | FC:PI |

Continued

| Entry number <sup>e</sup> | Species                                                                  | Voucher | Family                        | Higher group <sup>#</sup> | 2n <sup>‡</sup> | Ploidy level (x) | Life cycle type <sup>§</sup> | DNA amount             |                |         |         | Original ref. <sup>a</sup> | Present amount <sup>†</sup> | Standard species* <sup>b1</sup> | Method <sup>††</sup> |
|---------------------------|--------------------------------------------------------------------------|---------|-------------------------------|---------------------------|-----------------|------------------|------------------------------|------------------------|----------------|---------|---------|----------------------------|-----------------------------|---------------------------------|----------------------|
|                           |                                                                          |         |                               |                           |                 |                  |                              | 1C (Mbp <sup>b</sup> ) | 1C (pg)        | 2C (pg) | 4C (pg) |                            |                             |                                 |                      |
| 980a                      | <i>Galanthus platyphyllus</i> Traub & Moldenke <sup>i</sup>              | Yes     | Amaryllidaceae <sup>k</sup>   | M                         | 24 <sup>o</sup> | 2 <sup>z</sup>   | P                            | 44,206                 | 45.2           | 90.4    | 180.8   | 484                        | O                           | <i>Clivia</i> <sup>e</sup>      | FC:PI                |
| 981a                      | <i>Galanthus plicatus</i> M.Bieb. <sup>i</sup>                           | Yes     | Amaryllidaceae <sup>k</sup>   | M                         | 24 <sup>o</sup> | 2 <sup>z</sup>   | P                            | 27,091                 | 27.7           | 55.4    | 110.8   | 484                        | O                           | <i>Clivia</i> <sup>e</sup>      | FC:PI                |
| 981b                      | <i>Galanthus plicatus</i> M.Bieb. subsp. <i>byzantinus</i> <sup>i</sup>  | Yes     | Amaryllidaceae <sup>k</sup>   | M                         | 24 <sup>o</sup> | 2 <sup>z</sup>   | P                            | 28,313                 | 29.0           | 57.9    | 115.8   | 484                        | O                           | <i>Clivia</i> <sup>e</sup>      | FC:PI                |
| 982a                      | <i>Galanthus reginae-olgae</i> Orph. subsp. <i>vernalis</i> <sup>i</sup> | Yes     | Amaryllidaceae <sup>k</sup>   | M                         | 24 <sup>o</sup> | 2 <sup>z</sup>   | P                            | 34,279                 | 35.1           | 70.1    | 140.2   | 484                        | O                           | <i>Clivia</i> <sup>e</sup>      | FC:PI                |
| 982b                      | <i>Galanthus reginae-olgae</i> Orph. <sup>i</sup>                        | Yes     | Amaryllidaceae <sup>k</sup>   | M                         | 24 <sup>o</sup> | 2 <sup>z</sup>   | P                            | 37,457                 | 38.3           | 76.6    | 153.2   | 484                        | O                           | <i>Clivia</i> <sup>e</sup>      | FC:PI                |
| 982c                      | <i>Galanthus reginae-olgae</i> Orph. subsp. <i>reginae-olgae</i>         | Yes     | Amaryllidaceae <sup>k</sup>   | M                         | 24 <sup>o</sup> | 2 <sup>z</sup>   | P                            | 37,457                 | 38.3           | 76.6    | 153.2   | 484                        | O                           | <i>Clivia</i> <sup>e</sup>      | FC:PI                |
| 982d                      | <i>Galanthus reginae-olgae</i> Orph. subsp. <i>vernalis</i> <sup>i</sup> | Yes     | Amaryllidaceae <sup>k</sup>   | M                         | 24 <sup>o</sup> | 2 <sup>z</sup>   | P                            | 39,218                 | 40.1           | 80.2    | 160.4   | 484                        | O                           | <i>Clivia</i> <sup>e</sup>      | FC:PI                |
| 983a                      | <i>Galanthus rizehensis</i> Stern                                        | Yes     | Amaryllidaceae <sup>k</sup>   | M                         | 24 <sup>o</sup> | 2 <sup>z</sup>   | P                            | 23,717                 | 24.3           | 48.5    | 97.0    | 484                        | O                           | <i>Clivia</i> <sup>e</sup>      | FC:PI                |
| 984a                      | <i>Galanthus rizehensis</i> Stern <sup>i</sup>                           | Yes     | Amaryllidaceae <sup>k</sup>   | M                         | 36 <sup>o</sup> | 3 <sup>z</sup>   | P                            | – <sup>i</sup>         | – <sup>i</sup> | 72.9    | 145.8   | 484                        | O                           | <i>Clivia</i> <sup>e</sup>      | FC:PI                |
| 985a                      | <i>Galanthus transcaucasicus</i> Fomin <sup>i</sup>                      | Yes     | Amaryllidaceae <sup>k</sup>   | M                         | 24 <sup>o</sup> | 2 <sup>z</sup>   | P                            | 40,049                 | 41.0           | 81.9    | 163.8   | 484                        | O                           | <i>Clivia</i> <sup>e</sup>      | FC:PI                |
| 986a                      | <i>Galanthus transcaucasicus</i> Fomin                                   | Yes     | Amaryllidaceae <sup>k</sup>   | M                         | 48 <sup>o</sup> | 4 <sup>z</sup>   | P                            | 78,827                 | 80.6           | 161.2   | 322.4   | 484                        | O                           | <i>Clivia</i> <sup>e</sup>      | FC:PI                |
| 987a                      | <i>Galanthus trojanus</i> A.P.Davis & Özhatay                            | Yes     | Amaryllidaceae <sup>k</sup>   | M                         | 24 <sup>o</sup> | 2 <sup>z</sup>   | P                            | 27,824                 | 28.5           | 56.9    | 113.8   | 484                        | O                           | <i>Clivia</i> <sup>e</sup>      | FC:PI                |
| 988a                      | <i>Galanthus woronowii</i> Losinsk. <sup>i</sup>                         | Yes     | Amaryllidaceae <sup>k</sup>   | M                         | 24 <sup>o</sup> | 2 <sup>z</sup>   | P                            | 27,531                 | 28.2           | 56.3    | 112.6   | 484                        | O                           | <i>Clivia</i> <sup>e</sup>      | FC:PI                |
| 989a                      | <i>Gasteria acinacifolia</i> (Jacq.) Haw. <sup>i</sup>                   | Yes     | Xanthorrhoeaceae <sup>k</sup> | M                         | 14 <sup>o</sup> | 2                | P                            | 18,924                 | 19.4           | 38.7    | 77.4    | 473                        | O                           | <i>Agave</i> sp. <sup>e</sup>   | FC:PI                |
| 990a                      | <i>Gasteria acinacifolia</i> (Jacq.) Haw. cv. <i>Grandiflora</i>         | Yes     | Xanthorrhoeaceae <sup>k</sup> | M                         | 28 <sup>z</sup> | 4 <sup>z</sup>   | P                            | 37,457                 | 38.3           | 76.6    | 153.2   | 473                        | O                           | <i>Agave</i> sp. <sup>e</sup>   | FC:PI                |
| 991a                      | <i>Gasteria batesiana</i> Rowley var. <i>dolomitica</i>                  | Yes     | Xanthorrhoeaceae <sup>k</sup> | M                         | 14 <sup>o</sup> | 2                | P                            | 21,076                 | 21.6           | 43.1    | 86.2    | 473                        | O                           | <i>Agave</i> sp. <sup>e</sup>   | FC:PI                |
| 991b                      | <i>Gasteria batesiana</i> Rowley <sup>i</sup>                            | Yes     | Xanthorrhoeaceae <sup>k</sup> | M                         | 14 <sup>o</sup> | 2                | P                            | 21,516                 | 22.0           | 44.0    | 88.0    | 473                        | O                           | <i>Agave</i> sp. <sup>e</sup>   | FC:PI                |
| 992a                      | <i>Gasteria baylissiana</i> Rauh <sup>i</sup>                            | Yes     | Xanthorrhoeaceae <sup>k</sup> | M                         | 14 <sup>o</sup> | 2                | P                            | 17,653                 | 18.1           | 36.1    | 72.2    | 473                        | O                           | <i>Agave</i> sp. <sup>e</sup>   | FC:PI                |
| 993a                      | <i>Gasteria bicolor</i> Haw. var. <i>bicolor</i> <sup>i</sup>            | Yes     | Xanthorrhoeaceae <sup>k</sup> | M                         | 14 <sup>o</sup> | 2                | P                            | 17,604                 | 18.0           | 36.0    | 72.0    | 473                        | O                           | <i>Agave</i> sp. <sup>e</sup>   | FC:PI                |
| 993b                      | <i>Gasteria bicolor</i> Haw. var. <i>liliputana</i> <sup>i</sup>         | Yes     | Xanthorrhoeaceae <sup>k</sup> | M                         | 14 <sup>o</sup> | 2                | P                            | 17,653                 | 18.1           | 36.1    | 72.2    | 473                        | O                           | <i>Agave</i> sp. <sup>e</sup>   | FC:PI                |
| 994a                      | <i>Gasteria brachyphylla</i> (Salm-Dyck) van Jaarsv. var. <i>bayeri</i>  | Yes     | Xanthorrhoeaceae <sup>k</sup> | M                         | 14 <sup>o</sup> | 2                | P                            | 17,213                 | 17.6           | 35.2    | 70.4    | 473                        | O                           | <i>Agave</i> sp. <sup>e</sup>   | FC:PI                |
| 994b                      | <i>Gasteria brachyphylla</i> (Salm-Dyck) van Jaarsv. <sup>i</sup>        | Yes     | Xanthorrhoeaceae <sup>k</sup> | M                         | 14 <sup>o</sup> | 2                | P                            | 17,653                 | 18.1           | 36.1    | 72.2    | 473                        | O                           | <i>Agave</i> sp. <sup>e</sup>   | FC:PI                |

|       |                                                                                    |                |                               |   |                |                |   |        |      |      |       |     |   |                               |       |
|-------|------------------------------------------------------------------------------------|----------------|-------------------------------|---|----------------|----------------|---|--------|------|------|-------|-----|---|-------------------------------|-------|
| 995a  | <i>Gasteria carinata</i> Duval<br>var. <i>glabra</i> <sup>i</sup>                  | Yes            | Xanthorrhoeaceae <sup>k</sup> | M | 14°            | 2              | P | 18,680 | 19-1 | 38-2 | 76-4  | 473 | O | <i>Agave</i> sp. <sup>e</sup> | FC:PI |
| 995b  | <i>Gasteria carinata</i> Duval<br>var. <i>thunbergii</i> <sup>i</sup>              | Yes            | Xanthorrhoeaceae <sup>k</sup> | M | 14°            | 2              | P | 19,120 | 19-6 | 39-1 | 78-2  | 473 | O | <i>Agave</i> sp. <sup>e</sup> | FC:PI |
| 995c  | <i>Gasteria carinata</i> Duval<br>var. <i>verrucosa</i> <sup>i</sup>               | Yes            | Xanthorrhoeaceae <sup>k</sup> | M | 14°            | 2              | P | 19,511 | 20-0 | 39-9 | 79-8  | 473 | O | <i>Agave</i> sp. <sup>e</sup> | FC:PI |
| 995d  | <i>Gasteria carinata</i> Duval<br>var. <i>retusa</i> <sup>i</sup>                  | Yes            | Xanthorrhoeaceae <sup>k</sup> | M | 14°            | 2              | P | 19,511 | 20-0 | 39-9 | 79-8  | 473 | O | <i>Agave</i> sp. <sup>e</sup> | FC:PI |
| 995e  | <i>Gasteria carinata</i> Duval<br>var. <i>carinata</i>                             | Yes            | Xanthorrhoeaceae <sup>k</sup> | M | 14°            | 2              | P | 19,756 | 20-2 | 40-4 | 80-8  | 473 | O | <i>Agave</i> sp. <sup>e</sup> | FC:PI |
| 996a  | <i>Gasteria croucheri</i><br>(Hook.f.) Bak. <sup>i</sup>                           | Yes            | Xanthorrhoeaceae <sup>k</sup> | M | 14°            | 2              | P | 18,924 | 19-4 | 38-7 | 77-4  | 473 | O | <i>Agave</i> sp. <sup>e</sup> | FC:PI |
| 997a  | <i>Gasteria disticha</i> (L.)<br>Haw. <sup>i</sup>                                 | Yes            | Xanthorrhoeaceae <sup>k</sup> | M | 14°            | 2              | P | 17,457 | 17-9 | 35-7 | 71-4  | 473 | O | <i>Agave</i> sp. <sup>e</sup> | FC:PI |
| 998a  | <i>Gasteria ellaphieae</i> van<br>Jaarsv. <sup>i</sup>                             | Yes            | Xanthorrhoeaceae <sup>k</sup> | M | 14°            | 2              | P | 17,164 | 17-6 | 35-1 | 70-2  | 473 | O | <i>Agave</i> sp. <sup>e</sup> | FC:PI |
| 999a  | <i>Gasteria excelsa</i> Bak. <sup>i</sup>                                          | Yes            | Xanthorrhoeaceae <sup>k</sup> | M | 14°            | 2              | P | 18,289 | 18-7 | 37-4 | 74-8  | 473 | O | <i>Agave</i> sp. <sup>e</sup> | FC:PI |
| 1000a | <i>Gasteria excelsa</i> Bak.                                                       | Yes            | Xanthorrhoeaceae <sup>k</sup> | M | 28°            | 4              | P | 35,208 | 36-0 | 72-0 | 144-0 | 473 | O | <i>Agave</i> sp. <sup>e</sup> | FC:PI |
| 1001a | <i>Gasteria glauca</i> van<br>Jaarsv. <sup>i</sup>                                 | Yes            | Xanthorrhoeaceae <sup>k</sup> | M | 14°            | 2              | P | 17,360 | 17-8 | 35-5 | 71-0  | 473 | O | <i>Agave</i> sp. <sup>e</sup> | FC:PI |
| 1002a | <i>Gasteria glomerata</i> van<br>Jaarsv. <sup>i</sup>                              | Yes            | Xanthorrhoeaceae <sup>k</sup> | M | 14°            | 2              | P | 17,360 | 17-8 | 35-5 | 71-0  | 473 | O | <i>Agave</i> sp. <sup>e</sup> | FC:PI |
| 1003a | <i>Gasteria nitida</i><br>(Salm-Dyck) Haw. var.<br><i>armstrongii</i> <sup>i</sup> | Yes            | Xanthorrhoeaceae <sup>k</sup> | M | 14°            | 2              | P | 17,213 | 17-6 | 35-2 | 70-4  | 473 | O | <i>Agave</i> sp. <sup>e</sup> | FC:PI |
| 1003b | <i>Gasteria nitida</i><br>(Salm-Dyck) Haw. <sup>i</sup>                            | Yes            | Xanthorrhoeaceae <sup>k</sup> | M | 14°            | 2              | P | 17,408 | 17-8 | 35-6 | 71-2  | 473 | O | <i>Agave</i> sp. <sup>e</sup> | FC:PI |
| 1004a | <i>Gasteria pendulifolia</i> van<br>Jaarsv. <sup>i</sup>                           | Yes            | Xanthorrhoeaceae <sup>k</sup> | M | 14°            | 2              | P | 18,875 | 19-3 | 38-6 | 77-2  | 473 | O | <i>Agave</i> sp. <sup>e</sup> | FC:PI |
| 1005a | <i>Gasteria pillansii</i> Kensit<br>var. <i>pillansii</i> <sup>i</sup>             | Yes            | Xanthorrhoeaceae <sup>k</sup> | M | 14°            | 2              | P | 17,897 | 18-3 | 36-6 | 73-2  | 473 | O | <i>Agave</i> sp. <sup>e</sup> | FC:PI |
| 1005b | <i>Gasteria pillansii</i> Kensit<br>var. <i>ernesti-ruschii</i> <sup>i</sup>       | Yes            | Xanthorrhoeaceae <sup>k</sup> | M | 14°            | 2              | P | 18,093 | 18-5 | 37-0 | 74-0  | 473 | O | <i>Agave</i> sp. <sup>e</sup> | FC:PI |
| 1006a | <i>Gasteria polita</i> van<br>Jaarsv. <sup>i</sup>                                 | Yes            | Xanthorrhoeaceae <sup>k</sup> | M | 14°            | 2              | P | 17,311 | 17-7 | 35-4 | 70-8  | 473 | O | <i>Agave</i> sp. <sup>e</sup> | FC:PI |
| 1007b | <i>Gasteria pulchra</i> (Ait.)<br>Haw. <sup>i</sup>                                | Yes            | Xanthorrhoeaceae <sup>k</sup> | M | 14°            | 2              | P | 17,115 | 17-5 | 35-0 | 70-0  | 473 | O | <i>Agave</i> sp. <sup>e</sup> | FC:PI |
| 1008a | <i>Gasteria rawlinsonii</i><br>Oberm. <sup>i</sup>                                 | Yes            | Xanthorrhoeaceae <sup>k</sup> | M | 14°            | 2              | P | 16,430 | 16-8 | 33-6 | 67-2  | 473 | O | <i>Agave</i> sp. <sup>e</sup> | FC:PI |
| 1009a | <i>Gasteria vlokii</i> van<br>Jaarsv. <sup>i</sup>                                 | Yes            | Xanthorrhoeaceae <sup>k</sup> | M | 14°            | 2              | P | 17,311 | 17-7 | 35-4 | 70-8  | 473 | O | <i>Agave</i> sp. <sup>e</sup> | FC:PI |
| 1010a | <i>Genista benehoavensis</i><br>(Bolle ex Svent.) del<br>Arco                      | – <sup>m</sup> | Fabaceae <sup>j</sup>         | E | c. 48°         | 4              | P | 2,249  | 2-3  | 4-6  | 9-2   | 552 | O | H <sup>c</sup>                | FC:PI |
| 1011a | <i>Genlisea aurea</i> A.St.-Hil.                                                   | Yes            | Lentibulariaceae              | E | c. 52          | – <sup>p</sup> | P | 63     | 0-1  | 0-1  | 0-3   | 535 | O | G <sup>c</sup>                | CIA   |
| 1012a | <i>Genlisea hispidula</i> Stapf                                                    | Yes            | Lentibulariaceae              | E | – <sup>n</sup> | – <sup>p</sup> | P | 1,510  | 1-5  | 3-1  | 6-2   | 535 | O | G <sup>c</sup>                | CIA   |
| 1013a | <i>Genlisea lobata</i> Fromm                                                       | Yes            | Lentibulariaceae              | E | 16             | – <sup>p</sup> | P | 1,277  | 1-3  | 2-6  | 5-2   | 535 | O | G <sup>c</sup>                | CIA   |
| 1014a | <i>Genlisea margaretae</i><br>Hutch.                                               | Yes            | Lentibulariaceae              | E | c. 40          | – <sup>p</sup> | P | 63     | 0-1  | 0-1  | 0-3   | 535 | O | G <sup>c</sup>                | CIA   |
| 1015a | <i>Genlisea uncinata</i><br>P.Taylor &<br>E.Fromm-Trinta                           | Yes            | Lentibulariaceae              | E | – <sup>n</sup> | – <sup>p</sup> | P | 995    | 1-0  | 2-0  | 4-1   | 535 | O | G <sup>c</sup>                | CIA   |
| 1016a | <i>Genlisea violacea</i><br>A.St.-Hil.                                             | Yes            | Lentibulariaceae              | E | – <sup>n</sup> | – <sup>p</sup> | P | 1,005  | 1-0  | 2-1  | 4-1   | 535 | O | G <sup>c</sup>                | CIA   |

Continued

| Entry number <sup>g</sup> | Species                                          | Voucher        | Family                  | Higher group <sup>#</sup> | 2n <sup>‡</sup> | Ploidy level (x) | Life cycle type <sup>§</sup> | DNA amount             |         |         |         | Original ref. <sup>a</sup> | Present amount <sup>†</sup> | Standard species <sup>*b1</sup> | Method <sup>††</sup> |
|---------------------------|--------------------------------------------------|----------------|-------------------------|---------------------------|-----------------|------------------|------------------------------|------------------------|---------|---------|---------|----------------------------|-----------------------------|---------------------------------|----------------------|
|                           |                                                  |                |                         |                           |                 |                  |                              | 1C (Mbp <sup>s</sup> ) | 1C (pg) | 2C (pg) | 4C (pg) |                            |                             |                                 |                      |
| 1017a                     | <i>Gentiana cruciata</i> L.                      | – <sup>m</sup> | Gentianaceae            | E                         | – <sup>n</sup>  | – <sup>p</sup>   | – <sup>q</sup>               | 4,328                  | 4.4     | 8.9     | 17.7    | 488                        | O                           | <i>Petunia</i> <sup>e</sup>     | FC:PI                |
| 1018a                     | <i>Gentiana tibetica</i> King ex Hook.f.         | – <sup>m</sup> | Gentianaceae            | E                         | – <sup>n</sup>  | – <sup>p</sup>   | P                            | 3,643                  | 3.7     | 7.5     | 14.9    | 488                        | O                           | <i>Petunia</i> <sup>e</sup>     | FC:PI                |
| 1019a                     | <i>Gesnouinia arborea</i> (L.f.) Gaud.           | – <sup>m</sup> | Urticaceae              | E                         | 20 <sup>o</sup> | 2                | P                            | 499                    | 0.5     | 1.0     | 2.0     | 477                        | O                           | <i>Solan.</i> <sup>c</sup>      | FC:PI                |
| 1020a                     | <i>Gillenia stipulata</i> (Willd.) Nutt.         | Yes            | Rosaceae                | E                         | – <sup>n</sup>  | – <sup>p</sup>   | P                            | 494                    | 0.5     | 1.0     | 2.0     | 527                        | O                           | G <sup>c</sup>                  | FC:PI                |
| 1021a                     | <i>Gillenia trifoliata</i> (L.) Moench           | Yes            | Rosaceae                | E                         | – <sup>n</sup>  | 2 <sup>z</sup>   | P                            | 406                    | 0.4     | 0.8     | 1.7     | 527                        | O                           | G <sup>c</sup>                  | FC:PI                |
| 1022a                     | <i>Globularia salicina</i> Lam.                  | – <sup>m</sup> | Plantaginaceae          | E                         | 16              | 2                | P                            | 411                    | 0.4     | 0.8     | 1.7     | 552                        | O                           | <i>Raphanus</i> <sup>e</sup>    | FC:PI                |
| 1023n                     | <i>Glycine max</i> (L.) Merr.                    | Yes            | Fabaceae <sup>j</sup>   | E                         | – <sup>n</sup>  | – <sup>p</sup>   | A                            | 1,335                  | 1.4     | 2.7     | 5.5     | 492                        | O                           | G <sup>c</sup>                  | FC:PI                |
| 1024a                     | <i>Gnidia polystachya</i> P.J.Bergius            | No             | Thymelaeaceae           | E                         | 18              | – <sup>p</sup>   | P                            | 824                    | 0.8     | 1.7     | 3.4     | 612                        | O                           | J                               | Fe                   |
| 1025a                     | <i>Gomesa flexuosa</i> <sup>l</sup>              | Yes            | Orchidaceae             | M                         | – <sup>n</sup>  | – <sup>p</sup>   | P                            | 1,076                  | 1.1     | 2.2     | 4.4     | 504 <sup>ah</sup>          | O                           | – <sup>w</sup>                  | FC:DAPI              |
| 1026a                     | <i>Gonospermum canariense</i> Less.              | – <sup>m</sup> | Asteraceae <sup>j</sup> | E                         | 18 <sup>o</sup> | 2                | P                            | 5,980                  | 6.1     | 12.2    | 24.5    | 552                        | O                           | G <sup>c</sup>                  | FC:PI                |
| 1027a                     | <i>Gonospermum fruticosum</i> (Buch) Less.       | – <sup>m</sup> | Asteraceae <sup>j</sup> | E                         | 18 <sup>o</sup> | 2                | P                            | 6,015                  | 6.2     | 12.3    | 24.6    | 552                        | O                           | G <sup>c</sup>                  | FC:PI                |
| 1028a                     | <i>Gossypium anomalum</i> Wawra                  | No             | Malvaceae               | E                         | 26 <sup>o</sup> | 2                | P                            | 1,359                  | 1.4     | 2.8     | 5.6     | 471                        | O                           | – <sup>v</sup>                  | FC:PI                |
| 1029a                     | <i>Gossypium arboreum</i> L. <sup>h</sup>        | No             | Malvaceae               | E                         | 26 <sup>o</sup> | 2                | P                            | 1,677                  | 1.7     | 3.4     | 6.9     | 471                        | O                           | – <sup>v</sup>                  | FC:PI                |
| 1029b                     | <i>Gossypium arboreum</i> L. <sup>h</sup>        | No             | Malvaceae               | E                         | 26 <sup>o</sup> | 2                | P                            | 1,746                  | 1.8     | 3.6     | 7.1     | 471                        | O                           | – <sup>v</sup>                  | FC:PI                |
| 1030a                     | <i>Gossypium areysianum</i> Deflers.             | No             | Malvaceae               | E                         | 26 <sup>o</sup> | 2                | P                            | 1,663                  | 1.7     | 3.4     | 6.8     | 471                        | O                           | – <sup>v</sup>                  | FC:PI                |
| 1031a                     | <i>Gossypium aridum</i> (Rose & Standl.) Skovst. | No             | Malvaceae               | E                         | 26 <sup>o</sup> | 2                | P                            | 919                    | 0.9     | 1.9     | 3.8     | 471                        | O                           | – <sup>v</sup>                  | FC:PI                |
| 1032a                     | <i>Gossypium armourianum</i> Kearney             | No             | Malvaceae               | E                         | 26 <sup>o</sup> | 2                | P                            | 856                    | 0.9     | 1.8     | 3.5     | 471                        | O                           | – <sup>v</sup>                  | FC:PI                |
| 1033a                     | <i>Gossypium australe</i> F.Muell.               | No             | Malvaceae               | E                         | 26 <sup>o</sup> | 2                | P                            | 1,834                  | 1.9     | 3.8     | 7.5     | 471                        | O                           | – <sup>v</sup>                  | FC:PI                |
| 1034a                     | <i>Gossypium barbadense</i> L.                   | No             | Malvaceae               | E                         | 26 <sup>o</sup> | 2                | P                            | 2,450                  | 2.5     | 5.0     | 10.0    | 471                        | O                           | – <sup>v</sup>                  | FC:PI                |
| 1035a                     | <i>Gossypium bickii</i> Prokh.                   | No             | Malvaceae               | E                         | 26 <sup>o</sup> | 2                | P                            | 1,756                  | 1.8     | 3.6     | 7.2     | 471                        | O                           | – <sup>v</sup>                  | FC:PI                |
| 1036a                     | <i>Gossypium capits-virdis</i> Mauer             | No             | Malvaceae               | E                         | 26 <sup>o</sup> | 2                | P                            | 1,345                  | 1.4     | 2.8     | 5.5     | 471                        | O                           | – <sup>v</sup>                  | FC:PI                |
| 1037a                     | <i>Gossypium cunninghamii</i> Tod.               | No             | Malvaceae               | E                         | 26 <sup>o</sup> | 2                | P                            | 2,499                  | 2.6     | 5.1     | 10.2    | 471                        | O                           | – <sup>v</sup>                  | FC:PI                |
| 1038a                     | <i>Gossypium darwinii</i> G.Watt                 | No             | Malvaceae               | E                         | 26 <sup>o</sup> | 2                | P                            | 2,362                  | 2.4     | 4.8     | 9.7     | 471                        | O                           | – <sup>v</sup>                  | FC:PI                |
| 1039a                     | <i>Gossypium davidsonii</i> Kellogg.             | No             | Malvaceae               | E                         | 26 <sup>o</sup> | 2                | P                            | 910                    | 0.9     | 1.9     | 3.7     | 471                        | O                           | – <sup>v</sup>                  | FC:PI                |
| 1040a                     | <i>Gossypium enthyale</i> Fryxell et al.         | No             | Malvaceae               | E                         | 26 <sup>o</sup> | 2                | P                            | 2,572                  | 2.6     | 5.3     | 10.5    | 471                        | O                           | – <sup>v</sup>                  | FC:PI                |
| 1041a                     | <i>Gossypium exiguum</i> Fryxell et al.          | No             | Malvaceae               | E                         | 26 <sup>o</sup> | 2                | P                            | 2,460                  | 2.5     | 5.0     | 10.1    | 471                        | O                           | – <sup>v</sup>                  | FC:PI                |
| 1042a                     | <i>Gossypium gossypioides</i> (Ulbr.) Standl.    | No             | Malvaceae               | E                         | 26 <sup>o</sup> | 2                | P                            | 841                    | 0.9     | 1.7     | 3.4     | 471                        | O                           | – <sup>v</sup>                  | FC:PI                |
| 1043a                     | <i>Gossypium harknessii</i> Brandegeee           | No             | Malvaceae               | E                         | 26 <sup>o</sup> | 2                | P                            | 910                    | 0.9     | 1.9     | 3.7     | 471                        | O                           | – <sup>v</sup>                  | FC:PI                |

|       |                                                                                     |                |                           |   |                |                |   |        |      |      |       |                   |   |                               |               |
|-------|-------------------------------------------------------------------------------------|----------------|---------------------------|---|----------------|----------------|---|--------|------|------|-------|-------------------|---|-------------------------------|---------------|
| 1044a | <i>Gossypium herbaceum</i><br>J.Hutch ex<br>S.C.Harland. subsp.<br><i>africanum</i> | No             | Malvaceae                 | E | 26°            | 2              | P | 1,667  | 1.7  | 3.4  | 6.8   | 471               | O | – <sup>v</sup>                | FC:PI         |
| 1045a | <i>Gossypium hirsutum</i> L. <sup>h</sup>                                           | No             | Malvaceae                 | E | 52°            | 4              | P | 2,347  | 2.4  | 4.8  | 9.6   | 471               | O | – <sup>v</sup>                | FC:PI         |
| 1045b | <i>Gossypium hirsutum</i> L. <sup>h</sup>                                           | No             | Malvaceae                 | E | 52°            | 4              | P | 2,489  | 2.5  | 5.1  | 10.2  | 471               | O | – <sup>v</sup>                | FC:PI         |
| 1046a | <i>Gossypium klotzschianum</i><br>Andersson                                         | No             | Malvaceae                 | E | 26°            | 2              | P | 880    | 0.9  | 1.8  | 3.6   | 471               | O | – <sup>v</sup>                | FC:PI         |
| 1047a | <i>Gossypium laxum</i><br>L.L.Phillips                                              | No             | Malvaceae                 | E | 26°            | 2              | P | 934    | 1.0  | 1.9  | 3.8   | 471               | O | – <sup>v</sup>                | FC:PI         |
| 1048a | <i>Gossypium lobatum</i><br>Gentry                                                  | No             | Malvaceae                 | E | 26°            | 2              | P | 934    | 1.0  | 1.9  | 3.8   | 471               | O | – <sup>v</sup>                | FC:PI         |
| 1049a | <i>Gossypium longicalyx</i><br>J.B.Hutch & B.J.S.Lee                                | No             | Malvaceae                 | E | 26°            | 2              | P | 1,311  | 1.3  | 2.7  | 5.4   | 471               | O | – <sup>v</sup>                | FC:PI         |
| 1050a | <i>Gossypium marchantii</i><br>Fryxell <i>et al.</i>                                | No             | Malvaceae                 | E | 26°            | 2              | P | 2,616  | 2.7  | 5.4  | 10.7  | 471               | O | – <sup>v</sup>                | FC:PI         |
| 1051a | <i>Gossypium mustelinum</i><br>Miers ex G.Watt                                      | No             | Malvaceae                 | E | 26°            | 2              | P | 2,372  | 2.4  | 4.9  | 9.7   | 471               | O | – <sup>v</sup>                | FC:PI         |
| 1052a | <i>Gossypium nelsonii</i><br>Fryxell.                                               | No             | Malvaceae                 | E | 26°            | 2              | P | 1,756  | 1.8  | 3.6  | 7.2   | 471               | O | – <sup>v</sup>                | FC:PI         |
| 1053a | <i>Gossypium nobile</i> Fryxell<br><i>et al.</i>                                    | No             | Malvaceae                 | E | 26°            | 2              | P | 2,778  | 2.8  | 5.7  | 11.4  | 471               | O | – <sup>v</sup>                | FC:PI         |
| 1054a | <i>Gossypium pilosum</i><br>Fryxell                                                 | No             | Malvaceae                 | E | 26°            | 2              | P | 2,494  | 2.6  | 5.1  | 10.2  | 471               | O | – <sup>v</sup>                | FC:PI         |
| 1055a | <i>Gossypium raimondii</i><br>Ulbr.                                                 | No             | Malvaceae                 | E | 26°            | 2              | P | 880    | 0.9  | 1.8  | 3.6   | 471               | O | – <sup>v</sup>                | Fe &<br>FC:PI |
| 1056a | <i>Gossypium robinsonii</i><br>F.Muell.                                             | No             | Malvaceae                 | E | 26°            | 2              | P | 1,951  | 2.0  | 4.0  | 8.0   | 471               | O | – <sup>v</sup>                | FC:PI         |
| 1057a | <i>Gossypium rotundifolium</i><br>Fryxell <i>et al.</i> <sup>h</sup>                | No             | Malvaceae                 | E | 26°            | 2              | P | 2,450  | 2.5  | 5.0  | 10.0  | 471               | O | – <sup>v</sup>                | FC:PI         |
| 1057b | <i>Gossypium rotundifolium</i><br>Fryxell <i>et al.</i> <sup>h</sup>                | No             | Malvaceae                 | E | 26°            | 2              | P | 2,479  | 2.5  | 5.1  | 10.1  | 471               | O | – <sup>v</sup>                | FC:PI         |
| 1058a | <i>Gossypium somalense</i><br>(Gürke) J.B.Hutch.                                    | No             | Malvaceae                 | E | 26°            | 2              | P | 1,496  | 1.5  | 3.1  | 6.1   | 471               | O | – <sup>v</sup>                | FC:PI         |
| 1059a | <i>Gossypium stocksii</i><br>M.Mast.                                                | No             | Malvaceae                 | E | 26°            | 2              | P | 1,531  | 1.6  | 3.1  | 6.3   | 471               | O | – <sup>v</sup>                | FC:PI         |
| 1060a | <i>Gossypium sturtianum</i><br>J.H.Willis.                                          | No             | Malvaceae                 | E | 26°            | 2              | P | 2,015  | 2.1  | 4.1  | 8.2   | 471               | O | – <sup>v</sup>                | FC:PI         |
| 1061a | <i>Gossypium thurberi</i> Tod.                                                      | No             | Malvaceae                 | E | 26°            | 2              | P | 841    | 0.9  | 1.7  | 3.4   | 471               | O | – <sup>v</sup>                | FC:PI         |
| 1062a | <i>Gossypium tomentosum</i><br>Nutt. ex Seem.                                       | No             | Malvaceae                 | E | 26°            | 2              | P | 2,381  | 2.4  | 4.9  | 9.7   | 471               | O | – <sup>v</sup>                | FC:PI         |
| 1063a | <i>Gossypium trilobum</i><br>(DC.) Skovst.                                          | No             | Malvaceae                 | E | 26°            | 2              | P | 851    | 0.9  | 1.7  | 3.5   | 471               | O | – <sup>v</sup>                | FC:PI         |
| 1064a | <i>Gossypium turneri</i><br>Fryxell                                                 | No             | Malvaceae                 | E | 26°            | 2              | P | 910    | 0.9  | 1.9  | 3.7   | 471               | O | – <sup>v</sup>                | FC:PI         |
| 1065a | <i>Greenovia aizoon</i> Bolle                                                       | – <sup>m</sup> | Crassulaceae              | E | 36°            | 4              | P | 479    | 0.5  | 1.0  | 2.0   | 552               | O | <i>Solan.</i> <sup>c</sup>    | FC:PI         |
| 1066a | <i>Greenovia dodrendalis</i><br>(Willd.) Webb &<br>Berthel.                         | – <sup>m</sup> | Crassulaceae              | E | 36°            | 4              | P | 455    | 0.5  | 0.9  | 1.9   | 552               | O | <i>Solan.</i> <sup>c</sup>    | FC:PI         |
| 1067a | <i>Guaiaacum officinale</i> L.                                                      | No             | Zygophyllaceae            | E | – <sup>n</sup> | – <sup>p</sup> | P | 460    | 0.5  | 0.9  | 1.9   | 501 <sup>ab</sup> | O | B <sup>c</sup>                | Fe            |
| 1068a | <i>Guillenia lasiophyllum</i><br>(Hook. & Arn.) Greene                              | – <sup>m</sup> | Brassicaceae <sup>j</sup> | E | 28°            | – <sup>p</sup> | A | 376    | 0.4  | 0.8  | 1.5   | 509               | O | – <sup>w</sup>                | FC:PI         |
| 1069a | <i>Haemanthus albiflos</i><br>Jacq.                                                 | No             | Amaryllidaceae            | M | 32°            | – <sup>p</sup> | P | 37,164 | 38.0 | 76.0 | 152.0 | 616               | O | <i>Agave</i> sp. <sup>c</sup> | FC:PI         |
| 1070a | <i>Hakea dactyloides</i> Car.                                                       | – <sup>m</sup> | Proteaceae                | E | – <sup>n</sup> | – <sup>p</sup> | P | 944    | 1.0  | 1.9  | 3.9   | 526               | O | A                             | FC:PI         |

Continued

| Entry number <sup>g</sup> | Species                                                                                    | Voucher        | Family                    | Higher group <sup>#</sup> | 2n <sup>‡</sup> | Ploidy level (x) | Life cycle type <sup>§</sup> | DNA amount             |         |         |         | Original ref. <sup>a</sup> | Present amount <sup>†</sup> | Standard species <sup>*b1</sup> | Method <sup>††</sup> |
|---------------------------|--------------------------------------------------------------------------------------------|----------------|---------------------------|---------------------------|-----------------|------------------|------------------------------|------------------------|---------|---------|---------|----------------------------|-----------------------------|---------------------------------|----------------------|
|                           |                                                                                            |                |                           |                           |                 |                  |                              | 1C (Mbp <sup>b</sup> ) | 1C (pg) | 2C (pg) | 4C (pg) |                            |                             |                                 |                      |
| 1071a                     | <i>Hakea tephrosperma</i> R.Br.                                                            | — <sup>m</sup> | Proteaceae                | E                         | — <sup>n</sup>  | — <sup>p</sup>   | — <sup>q</sup>               | 924                    | 0.9     | 1.9     | 3.8     | 526                        | O                           | A                               | FC:PI                |
| 1072a                     | <i>Hakea teretifolia</i> Britten                                                           | — <sup>m</sup> | Proteaceae                | E                         | — <sup>n</sup>  | — <sup>p</sup>   | — <sup>q</sup>               | 910                    | 0.9     | 1.9     | 3.7     | 526                        | O                           | A                               | FC:PI                |
| 1073a                     | <i>Halimium atriplicifolium</i> (Lam.) Spach                                               | Yes            | Cistaceae                 | E                         | 18              | 2                | P                            | 1,790                  | 1.8     | 3.7     | 7.3     | 567                        | O                           | <i>Solan.</i> <sup>c</sup>      | FC:PI                |
| 1074a                     | <i>Halimium calycinum</i> (L.) K. Koch                                                     | Yes            | Cistaceae                 | E                         | 18              | 2                | P                            | 3,721                  | 3.8     | 7.6     | 15.2    | 567                        | O                           | <i>Solan.</i> <sup>c</sup>      | FC:PI                |
| 1075a                     | <i>Halimium halimifolium</i> (L.) Willk. subsp. <i>multiflorum</i> (Salzm. Ex Dunal) Maire | Yes            | Cistaceae                 | E                         | 18              | 2                | P                            | 2,303                  | 2.4     | 4.7     | 9.4     | 567                        | O                           | <i>Solan.</i> <sup>c</sup>      | FC:PI                |
| 1076a                     | <i>Halimium lasianthum</i> (Lam.) Spach subsp. <i>alyssoides</i> (Lam.) Greuter            | Yes            | Cistaceae                 | E                         | 18              | 2                | P                            | 3,051                  | 3.1     | 6.2     | 12.5    | 567                        | O                           | <i>Solan.</i> <sup>c</sup>      | FC:PI                |
| 1077a                     | <i>Halimium ocymoides</i> (Lam.) Willk.                                                    | Yes            | Cistaceae                 | E                         | 18              | 2                | P                            | 2,699                  | 2.8     | 5.5     | 11.0    | 567                        | O                           | <i>Solan.</i> <sup>c</sup>      | FC:PI                |
| 1078a                     | <i>Halimium umbellatum</i> (L.) Spach subsp. <i>viscosum</i>                               | Yes            | Cistaceae                 | E                         | 18              | 2                | P                            | 1,868                  | 1.9     | 3.8     | 7.6     | 567                        | O                           | <i>Solan.</i> <sup>c</sup>      | FC:PI                |
| 1078b                     | <i>Halimium umbellatum</i> (L.) Spach subsp. <i>umbellatum</i>                             | Yes            | Cistaceae                 | E                         | 18              | 2                | P                            | 1,897                  | 1.9     | 3.9     | 7.8     | 567                        | O                           | <i>Solan.</i> <sup>c</sup>      | FC:PI                |
| 1079a                     | <i>Hamamelis virginiana</i> L.                                                             | No             | Hamamelidaceae            | E                         | 24              | — <sup>p</sup>   | P                            | 572                    | 0.6     | 1.2     | 2.3     | 612                        | O                           | J                               | Fe                   |
| 1080e                     | <i>Haplopappus gracilis</i> (Nutt.) A.Gray                                                 | Yes            | Asteraceae <sup>j</sup>   | E                         | — <sup>n</sup>  | — <sup>p</sup>   | A                            | 1,169                  | 1.2     | 2.4     | 4.8     | 492                        | O                           | <i>Glycine</i> <sup>e</sup>     | FC:PI                |
| 1081a                     | <i>Hechtia epigyna</i> Harms                                                               | Yes            | Bromeliaceae              | M                         | 50              | 2                | P                            | 469                    | 0.5     | 1.0     | 1.9     | 575                        | O                           | <i>Raphanus</i> <sup>e</sup>    | FC:PI                |
| 1082a                     | <i>Hechtia matudae</i> L.B.Sm.                                                             | Yes            | Bromeliaceae              | M                         | — <sup>n</sup>  | — <sup>p</sup>   | P                            | 460                    | 0.5     | 0.9     | 1.9     | 575                        | O                           | <i>Raphanus</i> <sup>e</sup>    | FC:PI                |
| 1083a                     | <i>Hedinia tibetica</i> (Thomson) Ostenf.                                                  | Yes            | Brassicaceae <sup>j</sup> | E                         | 24              | — <sup>p</sup>   | — <sup>q</sup>               | 450                    | 0.5     | 0.9     | 1.8     | 599                        | O                           | L                               | FC:PI                |
| 1084s                     | <i>Helianthus annuus</i> L. <sup>i</sup>                                                   | No             | Asteraceae <sup>j</sup>   | E                         | 34 <sup>o</sup> | 2                | A                            | 3,619                  | 3.7     | 7.4     | 14.8    | 485                        | O                           | F                               | FC:PI                |
| 1085b                     | <i>Helianthus anomalus</i> Blake <sup>i</sup>                                              | No             | Asteraceae <sup>j</sup>   | E                         | 34 <sup>o</sup> | 2                | A                            | 5,633                  | 5.8     | 11.5    | 23.0    | 485                        | O                           | F                               | FC:PI                |
| 1086b                     | <i>Helianthus deserticola</i> Heiser <sup>h</sup>                                          | No             | Asteraceae <sup>j</sup>   | E                         | 34 <sup>o</sup> | 2                | A                            | 4,856                  | 5.0     | 9.9     | 19.9    | 485                        | O                           | F                               | FC:PI                |
| 1086c                     | <i>Helianthus deserticola</i> Heiser <sup>h</sup>                                          | No             | Asteraceae <sup>j</sup>   | E                         | 34 <sup>o</sup> | 2                | A                            | 5,516                  | 5.6     | 11.3    | 22.6    | 485                        | O                           | F                               | FC:PI                |
| 1087b                     | <i>Helianthus paradoxus</i> Heiser <sup>i</sup>                                            | No             | Asteraceae <sup>j</sup>   | E                         | 34 <sup>o</sup> | 2                | A                            | 5,355                  | 5.5     | 11.0    | 21.9    | 485                        | O                           | F                               | FC:PI                |
| 1088c                     | <i>Helianthus petiolaris</i> Nutt. subsp. <i>fallax</i> <sup>i</sup>                       | No             | Asteraceae <sup>j</sup>   | E                         | 34 <sup>o</sup> | 2                | A                            | 3,330                  | 3.4     | 6.8     | 13.6    | 485                        | O                           | F                               | FC:PI                |
| 1088d                     | <i>Helianthus petiolaris</i> Nutt. subsp. <i>petiolaris</i> <sup>i</sup>                   | No             | Asteraceae <sup>j</sup>   | E                         | 34 <sup>o</sup> | 2                | A                            | 3,364                  | 3.4     | 6.9     | 13.8    | 485                        | O                           | F                               | FC:PI                |
| 1089a                     | <i>Heliophila amplexicaulis</i> L.f.                                                       | Yes            | Brassicaceae <sup>j</sup> | E                         | 20-22           | — <sup>p</sup>   | — <sup>q</sup>               | 372                    | 0.4     | 0.8     | 1.5     | 599                        | O                           | L                               | FC:PI                |
| 1090a                     | <i>Heliophila coronopifolia</i> L.                                                         | Yes            | Brassicaceae <sup>j</sup> | E                         | 20              | — <sup>p</sup>   | — <sup>q</sup>               | 421                    | 0.4     | 0.9     | 1.7     | 599                        | O                           | L                               | FC:PI                |
| 1091a                     | <i>Hepatica acutiloba</i> DC.                                                              | No             | Ranunculaceae             | E                         | 14 <sup>o</sup> | 2                | P                            | 19,707                 | 20.2    | 40.3    | 80.6    | 495                        | O                           | F                               | FC:PI                |



|       |                                                                                         |                  |                           |   |     |                |   |                |                |      |       |     |   |                        |       |
|-------|-----------------------------------------------------------------------------------------|------------------|---------------------------|---|-----|----------------|---|----------------|----------------|------|-------|-----|---|------------------------|-------|
| 1092a | <i>Hepatica americana</i> (DC.) Ker Gawl.                                               | No               | Ranunculaceae             | E | 14° | 2              | P | 19,658         | 20.1           | 40.2 | 80.4  | 495 | O | F                      | FC:PI |
| 1093a | <i>Hepatica asiatica</i> Nakai                                                          | No               | Ranunculaceae             | E | 14° | 2              | P | 20,636         | 21.1           | 42.2 | 84.4  | 495 | O | F                      | FC:PI |
| 1094a | <i>Hepatica falconeri</i> (Thomson) Juz.                                                | No               | Ranunculaceae             | E | 14  | 2              | P | 14,768         | 15.1           | 30.2 | 60.4  | 495 | O | F                      | FC:PI |
| 1095a | <i>Hepatica henryi</i> Steward                                                          | No               | Ranunculaceae             | E | 28  | 4              | P | 32,176         | 32.9           | 65.8 | 131.6 | 495 | O | F                      | FC:PI |
| 1096a | <i>Hepatica insularis</i> Nakai                                                         | No               | Ranunculaceae             | E | 14° | 2              | P | 20,391         | 20.9           | 41.7 | 83.4  | 495 | O | F                      | FC:PI |
| 1097a | <i>Hepatica maxima</i> (Nakai) Nakai                                                    | No               | Ranunculaceae             | E | 14° | 2              | P | 20,391         | 20.9           | 41.7 | 83.4  | 495 | O | F                      | FC:PI |
| 1098a | <i>Hepatica nobilis</i> Schreb var. <i>nobilis</i> .                                    | No               | Ranunculaceae             | E | 14° | 2              | P | 18,729         | 19.2           | 38.3 | 76.6  | 495 | O | F                      | FC:PI |
| 1098b | <i>Hepatica nobilis</i> Schreb var. <i>japonica</i> f. <i>japonica</i> (M.Hiroe) Kitam. | No               | Ranunculaceae             | E | 14° | 2              | P | 20,391         | 20.9           | 41.7 | 83.4  | 495 | O | F                      | FC:PI |
| 1098c | <i>Hepatica nobilis</i> Schreb var. <i>japonica</i> f. <i>variegata</i> (Makino) Kitam. | No               | Ranunculaceae             | E | 14° | 2              | P | 20,440         | 20.9           | 41.8 | 83.6  | 495 | O | F                      | FC:PI |
| 1098d | <i>Hepatica nobilis</i> Schreb var. <i>japonica</i> f. <i>magna</i> (M.Hiroe) Kitam.    | No               | Ranunculaceae             | E | 14° | 2              | P | 20,391         | 20.9           | 41.7 | 83.4  | 495 | O | F                      | FC:PI |
| 1099a | <i>Hepatica nobilis</i> Schreb var. <i>pubescens</i> (M.Hiroe) Kitam.                   | No               | Ranunculaceae             | E | 28° | 4              | P | 43,619         | 44.6           | 89.2 | 178.4 | 495 | O | F                      | FC:PI |
| 1100a | <i>Hepatica transsilvanica</i> Fuss                                                     | No               | Ranunculaceae             | E | 28° | 4              | P | 32,519         | 33.3           | 66.5 | 133.0 | 495 | O | F                      | FC:PI |
| 1101a | <i>Hepatica yamatutai</i> Nakai                                                         | No               | Ranunculaceae             | E | 28° | 4              | P | 34,719         | 35.5           | 71.0 | 142.0 | 495 | O | F                      | FC:PI |
| 1102b | <i>Hesperaloe parviflora</i> (Torrey) (Torr.) J.M.Coult.                                | No               | Asparagaceae <sup>k</sup> | M | 60° | – <sup>P</sup> | P | 3,912          | 4.0            | 8.0  | 16.0  | 482 | O | Agave sp. <sup>e</sup> | FC:PI |
| 1103a | <i>Hesperoyucca whipplei</i> (Torrey) Baker                                             | No               | Asparagaceae <sup>k</sup> | M | 60° | – <sup>P</sup> | P | 3,814          | 3.9            | 7.8  | 15.6  | 482 | O | Agave sp. <sup>e</sup> | FC:PI |
| 1104b | <i>Heterantherium piliferum</i> (Banks & Sol.) Hochst.                                  | No <sup>m1</sup> | Poaceae <sup>j</sup>      | M | 14  | 2              | A | 4,088          | 4.2            | 8.4  | 16.7  | 605 | O | F-2118p                | FC:PI |
| 1105c | <i>Hieracium aurantiacum</i> L.                                                         | Yes              | Asteraceae <sup>j</sup>   | E | 36  | 4              | P | 3,809          | 3.9            | 7.8  | 15.6  | 569 | O | H <sup>c</sup>         | FC:PI |
| 1106a | <i>Hieracium aurantiacum</i> L.                                                         | Yes              | Asteraceae <sup>j</sup>   | E | 45  | 5              | P | – <sup>t</sup> | – <sup>t</sup> | 9.5  | 19.0  | 569 | O | H <sup>c</sup>         | FC:PI |
| 1107a | <i>Hieracium bauhini</i> Besser                                                         | Yes              | Asteraceae <sup>j</sup>   | E | 36  | 4              | P | 4,044          | 4.1            | 8.3  | 16.5  | 569 | O | H <sup>c</sup>         | FC:PI |
| 1108b | <i>Hieracium bauhini</i> Besser                                                         | Yes              | Asteraceae <sup>j</sup>   | E | 45  | 5              | P | – <sup>t</sup> | – <sup>t</sup> | 10.1 | 20.1  | 569 | O | G <sup>c</sup>         | FC:PI |
| 1109a | <i>Hieracium bauhini</i> Besser                                                         | Yes              | Asteraceae <sup>j</sup>   | E | 54  | 6              | P | 5,575          | 5.7            | 11.4 | 22.8  | 569 | O | G <sup>c</sup>         | FC:PI |
| 1110a | <i>Hieracium bauhini</i> Besser                                                         | Yes              | Asteraceae <sup>j</sup>   | E | 63  | 7              | P | – <sup>t</sup> | – <sup>t</sup> | 13.9 | 27.7  | 569 | O | G <sup>c</sup>         | FC:PI |
| 1111a | <i>Hieracium bifurcum</i> M.Bieb.                                                       | Yes              | Asteraceae <sup>j</sup>   | E | 45° | 5              | P | – <sup>t</sup> | – <sup>t</sup> | 9.2  | 18.5  | 569 | O | H <sup>c</sup>         | FC:PI |
| 1112a | <i>Hieracium blyttianum</i> Fries                                                       | Yes              | Asteraceae <sup>j</sup>   | E | 36° | 4              | P | 3,531          | 3.6            | 7.2  | 14.4  | 569 | O | H <sup>c</sup>         | FC:PI |
| 1113b | <i>Hieracium brachiatum</i> Bert. ex DC.                                                | Yes              | Asteraceae <sup>j</sup>   | E | 36  | 4              | P | 3,677          | 3.8            | 7.5  | 15.0  | 569 | O | H <sup>c</sup>         | FC:PI |
| 1114a | <i>Hieracium brachiatum</i> Bert. ex DC.                                                | Yes              | Asteraceae <sup>j</sup>   | E | 45  | 5              | P | – <sup>t</sup> | – <sup>t</sup> | 9.3  | 18.5  | 569 | O | H <sup>c</sup>         | FC:PI |

Continued

| Entry number <sup>e</sup> | Species                                                       | Voucher | Family                  | Higher group <sup>#</sup> | 2n <sup>‡</sup> | Ploidy level (x) | Life cycle type <sup>§</sup> | DNA amount             |                |         |         | Original ref. <sup>a</sup> | Present amount <sup>†</sup> | Standard species <sup>*b1</sup> | Method <sup>††</sup> |
|---------------------------|---------------------------------------------------------------|---------|-------------------------|---------------------------|-----------------|------------------|------------------------------|------------------------|----------------|---------|---------|----------------------------|-----------------------------|---------------------------------|----------------------|
|                           |                                                               |         |                         |                           |                 |                  |                              | 1C (Mbp <sup>b</sup> ) | 1C (pg)        | 2C (pg) | 4C (pg) |                            |                             |                                 |                      |
| 1115a                     | <i>Hieracium brachiatum</i> Bert. ex DC.                      | Yes     | Asteraceae <sup>j</sup> | E                         | 63              | 7                | P                            | – <sup>t</sup>         | – <sup>t</sup> | 13.2    | 26.4    | 569                        | O                           | G <sup>c</sup>                  | FC:PI                |
| 1116a                     | <i>Hieracium brachiatum</i> Bert. ex DC.                      | Yes     | Asteraceae <sup>j</sup> | E                         | 72 <sup>o</sup> | 8                | P                            | 7,482                  | 7.7            | 15.3    | 30.6    | 569                        | O                           | G <sup>c</sup>                  | FC:PI                |
| 1117a                     | <i>Hieracium caespitosum</i> Dumort.                          | Yes     | Asteraceae <sup>j</sup> | E                         | 36              | 4                | P                            | 4,020                  | 4.1            | 8.2     | 16.4    | 569                        | O                           | H <sup>c</sup>                  | FC:PI                |
| 1118b                     | <i>Hieracium caespitosum</i> Dumort.                          | Yes     | Asteraceae <sup>j</sup> | E                         | – <sup>n</sup>  | 5                | P                            | – <sup>t</sup>         | – <sup>t</sup> | 10.1    | 20.2    | 569                        | O                           | G <sup>c</sup>                  | FC:PI                |
| 1119a                     | <i>Hieracium cymosum</i> L. subsp. <i>cymosum</i>             | Yes     | Asteraceae <sup>j</sup> | E                         | 18              | 2                | P                            | 2,029                  | 2.1            | 4.2     | 8.3     | 569                        | O                           | H <sup>c</sup>                  | FC:PI                |
| 1120a                     | <i>Hieracium cymosum</i> L. subsp. <i>cymosum</i>             | Yes     | Asteraceae <sup>j</sup> | E                         | 36              | 4                | P                            | 3,873                  | 4.0            | 7.9     | 15.8    | 569                        | O                           | H <sup>c</sup>                  | FC:PI                |
| 1121a                     | <i>Hieracium cymosum</i> L. subsp. <i>cymigerum</i> Reichenb. | Yes     | Asteraceae <sup>j</sup> | E                         | 45              | 5                | P                            | – <sup>t</sup>         | – <sup>t</sup> | 10.1    | 20.1    | 569                        | O                           | G <sup>c</sup>                  | FC:PI                |
| 1122a                     | <i>Hieracium echioides</i> L.                                 | Yes     | Asteraceae <sup>j</sup> | E                         | 18              | 2                | P                            | 2,108                  | 2.2            | 4.3     | 8.6     | 569                        | O                           | H <sup>c</sup>                  | FC:PI                |
| 1123a                     | <i>Hieracium echioides</i> L.                                 | Yes     | Asteraceae <sup>j</sup> | E                         | 27              | 3                | P                            | – <sup>t</sup>         | – <sup>t</sup> | 6.5     | 13.0    | 569                        | O                           | H <sup>c</sup>                  | FC:PI                |
| 1124a                     | <i>Hieracium echioides</i> L.                                 | Yes     | Asteraceae <sup>j</sup> | E                         | 36              | 4                | P                            | 4,186                  | 4.3            | 8.6     | 17.1    | 569                        | O                           | H <sup>c</sup>                  | FC:PI                |
| 1125a                     | <i>Hieracium echioides</i> L.                                 | Yes     | Asteraceae <sup>j</sup> | E                         | 45              | 5                | P                            | – <sup>t</sup>         | – <sup>t</sup> | 10.6    | 21.1    | 569                        | O                           | H <sup>c</sup>                  | FC:PI                |
| 1126a                     | <i>Hieracium floribundum</i> Wimm. & Grab.                    | Yes     | Asteraceae <sup>j</sup> | E                         | 36 <sup>o</sup> | 4                | P                            | 4,010                  | 4.1            | 8.2     | 16.4    | 569                        | O                           | H <sup>c</sup>                  | FC:PI                |
| 1127a                     | <i>Hieracium floribundum</i> Wimm. & Grab.                    | Yes     | Asteraceae <sup>j</sup> | E                         | – <sup>n</sup>  | 5                | P                            | – <sup>t</sup>         | – <sup>t</sup> | 10.4    | 20.8    | 569                        | O                           | G <sup>c</sup>                  | FC:PI                |
| 1128a                     | <i>Hieracium glomeratum</i> Froel.                            | Yes     | Asteraceae <sup>j</sup> | E                         | 36 <sup>o</sup> | 4                | P                            | 4,039                  | 4.1            | 8.3     | 16.5    | 569                        | O                           | H <sup>c</sup>                  | FC:PI                |
| 1129a                     | <i>Hieracium glomeratum</i> Froel.                            | Yes     | Asteraceae <sup>j</sup> | E                         | 45 <sup>o</sup> | 5                | P                            | – <sup>t</sup>         | – <sup>t</sup> | 10.2    | 20.4    | 569                        | O                           | G <sup>c</sup>                  | FC:PI                |
| 1130a                     | <i>Hieracium hoppeanum</i> Schultes                           | Yes     | Asteraceae <sup>j</sup> | E                         | 18              | 2                | P                            | 1,726                  | 1.8            | 3.5     | 7.1     | 569                        | O                           | H <sup>c</sup>                  | FC:PI                |
| 1131a                     | <i>Hieracium iseranum</i> Uechtr.                             | Yes     | Asteraceae <sup>j</sup> | E                         | 36              | 4                | P                            | 3,848                  | 3.9            | 7.9     | 15.7    | 569                        | O                           | H <sup>c</sup>                  | FC:PI                |
| 1132b                     | <i>Hieracium lactucella</i> Wallr.                            | Yes     | Asteraceae <sup>j</sup> | E                         | 18              | 2                | P                            | 1,990                  | 2.0            | 4.1     | 8.1     | 569                        | O                           | H <sup>c</sup>                  | FC:PI                |
| 1133b                     | <i>Hieracium leptophyton</i> Nägeli & Peter                   | Yes     | Asteraceae <sup>j</sup> | E                         | 63              | 7                | P                            | – <sup>t</sup>         | – <sup>t</sup> | 13.7    | 27.3    | 569                        | O                           | G <sup>c</sup>                  | FC:PI                |
| 1134a                     | <i>Hieracium macrostolonum</i> G.Schneider                    | Yes     | Asteraceae <sup>j</sup> | E                         | – <sup>n</sup>  | 6                | P                            | 5,369                  | 5.5            | 11.0    | 22.0    | 569                        | O                           | G <sup>c</sup>                  | FC:PI                |
| 1135a                     | <i>Hieracium onegense</i> (Norrl.) Norrl.                     | Yes     | Asteraceae <sup>j</sup> | E                         | 18              | 2                | P                            | 2,068                  | 2.1            | 4.2     | 8.5     | 569                        | O                           | H <sup>c</sup>                  | FC:PI                |
| 1136a                     | <i>Hieracium pavichii</i> Heuffel                             | Yes     | Asteraceae <sup>j</sup> | E                         | – <sup>n</sup>  | 2                | P                            | 1,922                  | 2.0            | 3.9     | 7.9     | 569                        | O                           | H                               | FC:PI                |
| 1137a                     | <i>Hieracium pilosella</i> L.                                 | Yes     | Asteraceae <sup>j</sup> | E                         | 36              | 4                | P                            | 3,369                  | 3.4            | 6.9     | 13.8    | 569                        | O                           | H <sup>c</sup>                  | FC:PI                |
| 1138a                     | <i>Hieracium pilosella</i> L.                                 | Yes     | Asteraceae <sup>j</sup> | E                         | 45              | 5                | P                            | – <sup>t</sup>         | – <sup>t</sup> | 8.6     | 17.2    | 569                        | O                           | H <sup>c</sup>                  | FC:PI                |
| 1138a                     | <i>Hieracium pilosella</i> L.                                 | Yes     | Asteraceae <sup>j</sup> | E                         | 54              | 6                | P                            | 5,100                  | 5.2            | 10.4    | 20.9    | 569                        | O                           | G <sup>c</sup>                  | FC:PI                |
| 1140a                     | <i>Hieracium piloselliflorum</i> Nägeli & Peter               | Yes     | Asteraceae <sup>j</sup> | E                         | 36              | 4                | P                            | 3,682                  | 3.8            | 7.5     | 15.1    | 569                        | O                           | H <sup>c</sup>                  | FC:PI                |
| 1140a                     | <i>Hieracium pilosella</i> L.                                 | Yes     | Asteraceae <sup>j</sup> | E                         | 63              | 7                | P                            | – <sup>t</sup>         | – <sup>t</sup> | 12.1    | 24.2    | 569                        | O                           | G <sup>c</sup>                  | FC:PI                |
| 1141a                     | <i>Hieracium piloselliflorum</i> Nägeli & Peter               | Yes     | Asteraceae <sup>j</sup> | E                         | 45              | 5                | P                            | – <sup>t</sup>         | – <sup>t</sup> | 9.0     | 18.0    | 569                        | O                           | H <sup>c</sup>                  | FC:PI                |

|       |                                                                                                                           |     |                           |   |                |                |                |                |                |      |      |                   |   |                            |       |
|-------|---------------------------------------------------------------------------------------------------------------------------|-----|---------------------------|---|----------------|----------------|----------------|----------------|----------------|------|------|-------------------|---|----------------------------|-------|
| 1142a | <i>Hieracium piloselliflorum</i><br>Nägeli & Peter                                                                        | Yes | Asteraceae <sup>j</sup>   | E | 54°            | 6              | P              | 5,227          | 5.3            | 10.7 | 21.4 | 569               | O | G <sup>c</sup>             | FC:PI |
| 1143a | <i>Hieracium rothianum</i><br>Wallr.                                                                                      | Yes | Asteraceae <sup>j</sup>   | E | 36°            | 4              | P              | 3,980          | 4.1            | 8.1  | 16.3 | 569               | O | H <sup>c</sup>             | FC:PI |
| 1144a | <i>Hieracium rubrum</i> Peter                                                                                             | Yes | Asteraceae <sup>j</sup>   | E | 54             | 6              | P              | 5,403          | 5.5            | 11.1 | 22.1 | 569               | O | G <sup>c</sup>             | FC:PI |
| 1145a | <i>Hieracium scandinavicum</i><br>Dahlst.                                                                                 | Yes | Asteraceae <sup>j</sup>   | E | – <sup>n</sup> | 4              | P              | 3,985          | 4.1            | 8.2  | 16.3 | 569               | O | H <sup>c</sup>             | FC:PI |
| 1146a | <i>Hieracium schultesii</i><br>F.W.Schultz                                                                                | Yes | Asteraceae <sup>j</sup>   | E | – <sup>n</sup> | 3              | P              | – <sup>t</sup> | – <sup>t</sup> | 5.5  | 11.1 | 569               | O | H <sup>c</sup>             | FC:PI |
| 1147a | <i>Hieracium schultesii</i><br>F.W.Schultz                                                                                | Yes | Asteraceae <sup>j</sup>   | E | 36             | 4              | P              | 3,648          | 3.7            | 7.5  | 14.9 | 569               | O | H <sup>c</sup>             | FC:PI |
| 1148a | <i>Hieracium schultesii</i><br>F.W.Schultz                                                                                | Yes | Asteraceae <sup>j</sup>   | E | 45°            | 5              | P              | – <sup>t</sup> | – <sup>t</sup> | 9.2  | 18.4 | 569               | O | H <sup>c</sup>             | FC:PI |
| 1149a | <i>Hieracium stoloniflorum</i><br>Waldst. & Kit.                                                                          | Yes | Asteraceae <sup>j</sup>   | E | 36             | 4              | P              | 3,545          | 3.6            | 7.3  | 14.5 | 569               | O | H <sup>c</sup>             | FC:PI |
| 1150a | <i>Hierochloe brunonis</i><br>Hook.f.                                                                                     | Yes | Poaceae <sup>i</sup>      | M | 84             | 12             | P              | 13,599         | 13.9           | 27.8 | 55.6 | 528               | O | – <sup>w</sup>             | FC:PI |
| 1151a | <i>Hierochloe equisetata</i><br>Zotov                                                                                     | Yes | Poaceae <sup>i</sup>      | M | 42             | 6              | P              | 8,851          | 9.1            | 18.1 | 36.2 | 528               | O | – <sup>w</sup>             | FC:PI |
| 1152a | <i>Hierochloe fusca</i> Zotov                                                                                             | Yes | Poaceae <sup>i</sup>      | M | 84             | 12             | P              | 13,472         | 13.8           | 29.7 | 55.1 | 528               | O | – <sup>w</sup>             | FC:PI |
| 1152b | <i>Hierochloe fusca</i> Zotov <sup>i</sup>                                                                                | Yes | Poaceae <sup>i</sup>      | M | 84             | 12             | P              | 14,514         | 14.8           | 29.7 | 59.4 | 528               | O | – <sup>w</sup>             | FC:PI |
| 1153a | <i>Hierochloe novae-zelandiae</i> Gand.                                                                                   | Yes | Poaceae <sup>i</sup>      | M | 28             | 4              | P              | 6,132          | 6.3            | 12.5 | 25.1 | 528               | O | – <sup>w</sup>             | FC:PI |
| 1154a | <i>Hierochloe redolens</i><br>(Vahl) Roem. & Schult.                                                                      | Yes | Poaceae <sup>i</sup>      | M | 84             | 12             | P              | 14,655         | 15.0           | 30.0 | 59.9 | 528               | O | – <sup>w</sup>             | FC:PI |
| 1155a | <i>Hippolytia megacephala</i><br>(Rupr.) Poljakov                                                                         | Yes | Asteraceae <sup>j</sup>   | E | 18°            | 2              | P              | 6,098          | 6.2            | 12.5 | 24.9 | 521               | O | G <sup>c</sup>             | FC:PI |
| 1156a | <i>Hirschfeldia incana</i> (L.)<br>Lagr.-Fossat                                                                           | Yes | Brassicaceae <sup>j</sup> | E | 16             | 2              | – <sup>q</sup> | 509            | 0.5            | 1.0  | 2.1  | 599               | O | L                          | FC:PI |
| 1157a | <i>Hitchenia caulina</i><br>(J. Graham) Baker<br>(= <i>Curcuma caulina</i><br>J. Graham)                                  | Yes | Zingiberaceae             | M | 42             | 6              | P              | 1,095          | 1.1            | 2.2  | 4.5  | 562               | O | <i>Bellis</i> <sup>c</sup> | FC:PI |
| 1158a | <i>Holarrhena pubescens</i><br>Wall. ex G.Don                                                                             | No  | Apocynaceae               | E | – <sup>n</sup> | – <sup>p</sup> | P              | 770            | 0.8            | 1.6  | 3.2  | 501 <sup>ag</sup> | O | B <sup>c</sup>             | Fe    |
| 1159a | <i>Hordeum arizonicum</i><br>Covas                                                                                        | Yes | Poaceae <sup>j</sup>      | M | 42             | 6              | A              | 12,069         | 12.3           | 24.7 | 49.4 | 491               | O | E <sup>c</sup>             | FC:PI |
| 1160b | <i>Hordeum bogdanii</i><br>Wilensky                                                                                       | Yes | Poaceae <sup>j</sup>      | M | 14             | 2              | P              | 4,636          | 4.7            | 9.5  | 19.0 | 491               | O | E <sup>c</sup>             | FC:PI |
| 1161b | <i>Hordeum brachyantherum</i><br>Nevski subsp.<br><i>californicum</i> (Covas &<br>Stebbins) Bothmer,<br>Jacobsen & Seberg | Yes | Poaceae <sup>j</sup>      | M | 14             | 2              | P              | 4,352          | 4.5            | 8.9  | 17.8 | 491               | O | E <sup>c</sup>             | FC:PI |
| 1162a | <i>Hordeum brachyantherum</i><br>Nevski subsp.<br><i>brachyantherum</i>                                                   | Yes | Poaceae <sup>j</sup>      | M | 28             | 4              | P              | 9,081          | 9.3            | 18.6 | 37.1 | 491               | O | G <sup>c</sup>             | FC:PI |
| 1163a | <i>Hordeum brachyantherum</i><br>Nevski subsp.<br><i>brachyantherum</i>                                                   | Yes | Poaceae <sup>j</sup>      | M | 42             | 6              | P              | 14,132         | 14.5           | 28.9 | 57.8 | 491               | O | E <sup>c</sup>             | FC:PI |

Continued

| Entry number <sup>e</sup> | Species                                                                                 | Voucher          | Family               | Higher group <sup>#</sup> | 2n <sup>‡</sup> | Ploidy level (x) | Life cycle type <sup>§</sup> | DNA amount             |         |         |         | Original ref. <sup>a</sup> | Present amount <sup>†</sup> | Standard species* <sup>b1</sup> | Method <sup>††</sup> |
|---------------------------|-----------------------------------------------------------------------------------------|------------------|----------------------|---------------------------|-----------------|------------------|------------------------------|------------------------|---------|---------|---------|----------------------------|-----------------------------|---------------------------------|----------------------|
|                           |                                                                                         |                  |                      |                           |                 |                  |                              | 1C (Mbp <sup>b</sup> ) | 1C (pg) | 2C (pg) | 4C (pg) |                            |                             |                                 |                      |
| 1164a                     | <i>Hordeum brevisubulatum</i> (Trin.) Link subsp. <i>brevisubulatum</i>                 | Yes              | Poaceae <sup>j</sup> | M                         | 28              | 4                | P                            | 8,709                  | 8.9     | 17.8    | 35.6    | 491                        | O                           | G <sup>c</sup>                  | FC:PI                |
| 1164b                     | <i>Hordeum brevisubulatum</i> (Trin.) Link subsp. <i>turkestanicum</i> (Nevski) Tzvelev | Yes              | Poaceae <sup>j</sup> | M                         | 28              | 4                | P                            | 8,880                  | 9.1     | 18.2    | 36.3    | 491                        | O                           | G <sup>c</sup>                  | FC:PI                |
| 1165a                     | <i>Hordeum brevisubulatum</i> (Trin.) Link                                              | Yes              | Poaceae <sup>j</sup> | M                         | 42              | 6                | P                            | 13,159                 | 13.5    | 26.9    | 53.8    | 491                        | O                           | E <sup>c</sup>                  | FC:PI                |
| 1166c                     | <i>Hordeum bulbosum</i> L.                                                              | Yes              | Poaceae <sup>j</sup> | M                         | 14              | 2                | P                            | 4,342                  | 4.4     | 8.9     | 17.8    | 491                        | O                           | E <sup>c</sup>                  | FC:PI                |
| 1167c                     | <i>Hordeum bulbosum</i> L.                                                              | Yes              | Poaceae <sup>j</sup> | M                         | 28              | 4                | P                            | 8,460                  | 8.7     | 17.3    | 34.6    | 491                        | O                           | G <sup>c</sup>                  | FC:PI                |
| 1168a                     | <i>Hordeum capense</i> Thunb.                                                           | Yes              | Poaceae <sup>j</sup> | M                         | 28              | 4                | P                            | 9,653                  | 9.9     | 19.7    | 39.5    | 491                        | O                           | G <sup>c</sup>                  | FC:PI                |
| 1169c                     | <i>Hordeum chilense</i> Roem. & Schult.                                                 | Yes              | Poaceae <sup>j</sup> | M                         | 14              | 2                | P                            | 4,289                  | 4.4     | 8.8     | 17.5    | 491                        | O                           | E <sup>c</sup>                  | FC:PI                |
| 1170b                     | <i>Hordeum comosum</i> J.Presl                                                          | Yes              | Poaceae <sup>j</sup> | M                         | 14              | 2                | P                            | 4,386                  | 4.5     | 9.0     | 17.9    | 491                        | O                           | E <sup>c</sup>                  | FC:PI                |
| 1171a                     | <i>Hordeum cordobense</i> Bothmer, Jacobsen & Nicora                                    | Yes              | Poaceae <sup>j</sup> | M                         | 14              | 2                | P                            | 4,494                  | 4.6     | 9.2     | 18.4    | 491                        | O                           | E <sup>c</sup>                  | FC:PI                |
| 1172a                     | <i>Hordeum depressum</i> (Scribn. & J.G.Sm.) Rydb.                                      | Yes              | Poaceae <sup>j</sup> | M                         | 28              | 4                | A                            | 7,589                  | 7.8     | 15.5    | 31.0    | 491                        | O                           | G <sup>c</sup>                  | FC:PI                |
| 1173a                     | <i>Hordeum erectifolium</i> Bothmer, Jacobsen & Jørgensen                               | Yes              | Poaceae <sup>j</sup> | M                         | 14              | 2                | P                            | 4,641                  | 4.7     | 9.5     | 19.0    | 491                        | O                           | E <sup>c</sup>                  | FC:PI                |
| 1174a                     | <i>Hordeum euclaston</i> Steud.                                                         | Yes              | Poaceae <sup>j</sup> | M                         | 14              | 2                | A                            | 3,350                  | 3.4     | 6.9     | 13.7    | 491                        | O                           | E <sup>c</sup>                  | FC:PI                |
| 1175b                     | <i>Hordeum flexuosum</i> Nees ex Steud.                                                 | Yes              | Poaceae <sup>j</sup> | M                         | 14              | 2                | P                            | 4,161                  | 4.3     | 8.5     | 17.0    | 491                        | O                           | E <sup>c</sup>                  | FC:PI                |
| 1176a                     | <i>Hordeum fuegianum</i> Bothmer, Jacobsen & Jørgensen                                  | Yes              | Poaceae <sup>j</sup> | M                         | 28              | 4                | P                            | 8,753                  | 9.0     | 17.9    | 35.8    | 491                        | O                           | G <sup>c</sup>                  | FC:PI                |
| 1177a                     | <i>Hordeum hystrix</i> Roth                                                             | No <sup>m1</sup> | Poaceae <sup>j</sup> | M                         | 14              | 2                | A                            | 4,919                  | 5.0     | 10.1    | 20.1    | 605                        | O                           | F-2118p                         | FC:PI                |
| 1178a                     | <i>Hordeum intercedens</i> Nevski                                                       | Yes              | Poaceae <sup>j</sup> | M                         | 14              | 2                | A                            | 3,428                  | 3.5     | 7.0     | 14.0    | 491                        | O                           | E <sup>c</sup>                  | FC:PI                |
| 1179b                     | <i>Hordeum jubatum</i> L.                                                               | Yes              | Poaceae <sup>j</sup> | M                         | 28              | 4                | BP                           | 8,646                  | 8.8     | 17.7    | 35.4    | 491                        | O                           | G <sup>c</sup>                  | FC:PI                |
| 1180a                     | <i>Hordeum lechleri</i> (Steud.) Schenck                                                | Yes              | Poaceae <sup>j</sup> | M                         | 42              | 6                | P                            | 13,022                 | 13.3    | 26.6    | 53.3    | 491                        | O                           | E <sup>c</sup>                  | FC:PI                |
| 1181b                     | <i>Hordeum marinum</i> Huds. subsp. <i>marinum</i>                                      | Yes              | Poaceae <sup>j</sup> | M                         | 14              | 2                | A                            | 4,450                  | 4.6     | 9.1     | 18.2    | 491                        | O                           | E <sup>c</sup>                  | FC:PI                |
| 1181c                     | <i>Hordeum marinum</i> Huds. subsp. <i>gussoneanum</i> (Parl.) Thell.                   | Yes              | Poaceae <sup>j</sup> | M                         | 14              | 2                | A                            | 5,090                  | 5.2     | 10.4    | 20.8    | 491                        | O                           | E <sup>c</sup>                  | FC:PI                |
| 1182a                     | <i>Hordeum marinum</i> Huds. subsp. <i>gussoneanum</i> (Parl.) Thell.                   | Yes              | Poaceae <sup>j</sup> | M                         | 28              | 4                | A                            | 9,604                  | 9.8     | 19.6    | 39.3    | 491                        | O                           | G <sup>c</sup>                  | FC:PI                |
| 1183b                     | <i>Hordeum murinum</i> L. subsp. <i>glaucum</i>                                         | Yes              | Poaceae <sup>j</sup> | M                         | 14              | 2                | A                            | 4,455                  | 4.6     | 9.1     | 18.2    | 491                        | O                           | E <sup>c</sup>                  | FC:PI                |
| 1183c                     | <i>Hordeum murinum</i> L. subsp. <i>glaucum</i>                                         | No <sup>m1</sup> | Poaceae <sup>j</sup> | M                         | 14              | 2                | A                            | 6,230                  | 6.4     | 12.7    | 25.5    | 605                        | O                           | F-2118p                         | FC:PI                |

|       |                                                                                                                                   |                  |                      |   |                 |   |   |        |      |      |      |     |   |                    |       |
|-------|-----------------------------------------------------------------------------------------------------------------------------------|------------------|----------------------|---|-----------------|---|---|--------|------|------|------|-----|---|--------------------|-------|
| 1184c | <i>Hordeum murinum</i><br>L. subsp. <i>murinum</i>                                                                                | Yes              | Poaceae <sup>j</sup> | M | 28              | 4 | A | 9,624  | 9.8  | 19.7 | 39.4 | 491 | O | G <sup>c</sup>     | FC:PI |
| 1184d | <i>Hordeum murinum</i><br>L. subsp. <i>leporinum</i><br>(Link) Arcang.                                                            | Yes              | Poaceae <sup>j</sup> | M | 28              | 4 | A | 9,389  | 9.6  | 19.2 | 38.4 | 491 | O | G <sup>c</sup>     | FC:PI |
| 1185e | <i>Hordeum murinum</i><br>L. subsp. <i>leporinum</i><br>(Link) Arcang.                                                            | Yes              | Poaceae <sup>j</sup> | M | 42              | 6 | A | 14,597 | 14.9 | 29.9 | 59.7 | 491 | O | E <sup>c</sup>     | FC:PI |
| 1186a | <i>Hordeum muticum</i> J.Presl                                                                                                    | Yes              | Poaceae <sup>j</sup> | M | 14              | 2 | P | 4,680  | 4.8  | 9.6  | 19.1 | 491 | O | E <sup>c</sup>     | FC:PI |
| 1187a | <i>Hordeum parodii</i> Covas                                                                                                      | Yes              | Poaceae <sup>j</sup> | M | 42              | 6 | P | 12,807 | 13.1 | 26.2 | 52.4 | 491 | O | E <sup>c</sup>     | FC:PI |
| 1188a | <i>Hordeum patagonicum</i><br>(Haumann) Covas<br>subsp. <i>santacrucense</i><br>(Parodi & Nicora)<br>Bothmer, Giles &<br>Jacobsen | Yes              | Poaceae <sup>j</sup> | M | 14              | 2 | P | 4,474  | 4.6  | 9.2  | 18.3 | 491 | O | E <sup>c</sup>     | FC:PI |
| 1188b | <i>Hordeum patagonicum</i><br>(Haumann) Covas<br>subsp. <i>magellanicum</i><br>(Parodi & Nicora)<br>Bothmer, Giles &<br>Jacobsen  | Yes              | Poaceae <sup>j</sup> | M | 14              | 2 | P | 4,562  | 4.7  | 9.3  | 18.7 | 491 | O | E <sup>c</sup>     | FC:PI |
| 1188c | <i>Hordeum patagonicum</i><br>(Haumann) Covas<br>subsp. <i>patagonicum</i>                                                        | Yes              | Poaceae <sup>j</sup> | M | 14              | 2 | P | 4,626  | 4.7  | 9.5  | 18.9 | 491 | O | E <sup>c</sup>     | FC:PI |
| 1188d | <i>Hordeum patagonicum</i><br>(Haumann) Covas<br>subsp. <i>setifolium</i><br>(Parodi & Nicora)<br>Bothmer, Giles &<br>Jacobsen    | Yes              | Poaceae <sup>j</sup> | M | 14              | 2 | P | 4,699  | 4.8  | 9.6  | 19.2 | 491 | O | E <sup>c</sup>     | FC:PI |
| 1188e | <i>Hordeum patagonicum</i><br>(Haumann) Covas<br>subsp. <i>mustersii</i><br>(Nicora) Bothmer,<br>Giles & Jacobsen                 | Yes              | Poaceae <sup>j</sup> | M | 14              | 2 | P | 4,289  | 4.4  | 8.8  | 17.5 | 491 | O | E <sup>c</sup>     | FC:PI |
| 1189a | <i>Hordeum procerum</i><br>Nevski                                                                                                 | Yes              | Poaceae <sup>j</sup> | M | 42              | 6 | P | 13,291 | 13.6 | 27.2 | 54.4 | 491 | O | E <sup>c</sup>     | FC:PI |
| 1190a | <i>Hordeum pubiflorum</i><br>Hook.f. subsp.<br><i>pubiflorum</i>                                                                  | Yes              | Poaceae <sup>j</sup> | M | 14              | 2 | P | 4,220  | 4.3  | 8.6  | 17.3 | 491 | O | E <sup>c</sup>     | FC:PI |
| 1190b | <i>Hordeum pubiflorum</i><br>Hook.f. subsp.<br><i>halophilum</i> (Griseb.)<br>Baden & Bothmer                                     | Yes              | Poaceae <sup>j</sup> | M | 14              | 2 | P | 4,254  | 4.4  | 8.7  | 17.4 | 491 | O | E <sup>c</sup>     | FC:PI |
| 1191b | <i>Hordeum pusillum</i> Nutt.                                                                                                     | Yes              | Poaceae <sup>j</sup> | M | 14              | 2 | A | 3,501  | 3.6  | 7.2  | 14.3 | 491 | O | E <sup>c</sup>     | FC:PI |
| 1192c | <i>Hordeum roshevitzii</i><br>Bowden                                                                                              | Yes              | Poaceae <sup>j</sup> | M | 14              | 2 | P | 4,738  | 4.8  | 9.7  | 19.4 | 491 | O | E <sup>c</sup>     | FC:PI |
| 1193b | <i>Hordeum secalinum</i><br>Schreb.                                                                                               | Yes              | Poaceae <sup>j</sup> | M | 28              | 4 | P | 9,770  | 10.0 | 20.0 | 40.0 | 491 | O | G <sup>c</sup>     | FC:PI |
| 1194b | <i>Hordeum spontaneum</i><br>K.Koch <sup>h</sup>                                                                                  | – <sup>m</sup>   | Poaceae <sup>j</sup> | M | 14 <sup>o</sup> | 2 | P | 4,572  | 4.7  | 9.4  | 18.7 | 470 | O | Trout <sup>f</sup> | FC:PI |
| 1194c | <i>Hordeum spontaneum</i><br>K.Koch <sup>h</sup>                                                                                  | – <sup>m</sup>   | Poaceae <sup>j</sup> | M | 14 <sup>o</sup> | 2 | P | 4,797  | 4.9  | 9.8  | 19.6 | 470 | O | Trout <sup>f</sup> | FC:PI |
| 1194d | <i>Hordeum spontaneum</i><br>K. Koch                                                                                              | No <sup>m1</sup> | Poaceae <sup>j</sup> | M | 14              | 2 | A | 5,379  | 5.5  | 11.0 | 22.0 | 605 | O | F-2118p            | FC:PI |

Continued

| Entry number <sup>e</sup> | Species                                                           | Voucher        | Family                    | Higher group <sup>#</sup> | 2n <sup>‡</sup> | Ploidy level (x) | Life cycle type <sup>§</sup> | DNA amount             |                |         |         | Original ref. <sup>a</sup> | Present amount <sup>†</sup> | Standard species <sup>*b1</sup> | Method <sup>††</sup> |
|---------------------------|-------------------------------------------------------------------|----------------|---------------------------|---------------------------|-----------------|------------------|------------------------------|------------------------|----------------|---------|---------|----------------------------|-----------------------------|---------------------------------|----------------------|
|                           |                                                                   |                |                           |                           |                 |                  |                              | 1C (Mbp <sup>b</sup> ) | 1C (pg)        | 2C (pg) | 4C (pg) |                            |                             |                                 |                      |
| 1195b                     | <i>Hordeum stenostachys</i> Godr.                                 | Yes            | Poaceae <sup>j</sup>      | M                         | 14              | 2                | P                            | 4,587                  | 4.7            | 9.4     | 18.8    | 491                        | O                           | E <sup>c</sup>                  | FC:PI                |
| 1196a                     | <i>Hordeum tetraploidum</i> Covas                                 | Yes            | Poaceae <sup>j</sup>      | M                         | 28              | 4                | P                            | 8,743                  | 8.9            | 17.9    | 35.8    | 491                        | O                           | G <sup>c</sup>                  | FC:PI                |
| 1197r                     | <i>Hordeum vulgare</i> L.                                         | Yes            | Poaceae <sup>j</sup>      | M                         | — <sup>n</sup>  | — <sup>p</sup>   | A                            | 5,022                  | 5.1            | 10.3    | 20.5    | 492                        | O                           | E <sup>c</sup>                  | FC:PI                |
| 1197s                     | <i>Hordeum vulgare</i> L. subsp. <i>vulgare</i>                   | Yes            | Poaceae <sup>j</sup>      | M                         | 14              | 2                | A                            | 5,179                  | 5.3            | 10.6    | 21.2    | 491                        | O                           | E <sup>c</sup>                  | FC:PI                |
| 1197t                     | <i>Hordeum vulgare</i> L. subsp. <i>spontaneum</i> (K.Koch) Thell | Yes            | Poaceae <sup>j</sup>      | M                         | 14              | 2                | A                            | 5,218                  | 5.3            | 10.7    | 21.3    | 491                        | O                           | E <sup>c</sup>                  | FC:PI                |
| 1198a                     | <i>Hornungia petraea</i> Rchb.                                    | Yes            | Brassicaceae <sup>j</sup> | E                         | 12              | 2                | — <sup>q</sup>               | 166                    | 0.2            | 0.3     | 0.7     | 599                        | O                           | L                               | FC:PI                |
| 1199a                     | <i>Hornungia procumbens</i> (L.) Hayek                            | Yes            | Brassicaceae <sup>j</sup> | E                         | 12 <sup>o</sup> | 2                | — <sup>q</sup>               | 205                    | 0.2            | 0.4     | 0.8     | 599                        | O                           | L                               | FC:PI                |
| 1200b                     | <i>Hosta minor</i> Nakai                                          | No             | Asparagaceae <sup>k</sup> | M                         | 60 <sup>o</sup> | — <sup>p</sup>   | P                            | 8,411                  | 8.6            | 17.2    | 34.4    | 482                        | O                           | <i>Agave</i> sp. <sup>e</sup>   | FC:PI                |
| 1201a                     | <i>Humulus japonicus</i> Siebold & Zucc. (female)                 | No             | Cannabaceae               | E                         | 16              | 2                | A                            | 1,569                  | 1.6            | 3.2     | 6.4     | 543                        | O                           | H <sup>c</sup>                  | FC:PI                |
| 1201b                     | <i>Humulus japonicus</i> Siebold & Zucc. (male)                   | No             | Cannabaceae               | E                         | 17              | 2                | A                            | 1,722                  | 1.8            | 3.5     | 7.0     | 543                        | O                           | H <sup>c</sup>                  | FC:PI                |
| 1202c                     | <i>Humulus lupulus</i> L. cv. Lubelski (female)                   | No             | Cannabaceae               | E                         | 20              | 2                | P                            | 2,737                  | 2.8            | 5.6     | 11.2    | 543                        | O                           | <i>Petunia</i> <sup>e</sup>     | FC:PI                |
| 1202d                     | <i>Humulus lupulus</i> L. (male)                                  | No             | Cannabaceae               | E                         | 20              | 2                | P                            | 2,701                  | 2.8            | 5.5     | 11.0    | 543                        | O                           | <i>Petunia</i> <sup>e</sup>     | FC:PI                |
| 1202e                     | <i>Humulus lupulus</i> L. var. <i>neomexicanus</i> (female)       | No             | Cannabaceae               | E                         | 20              | 2                | P                            | 2,965                  | 3.0            | 6.1     | 12.1    | 543                        | O                           | <i>Petunia</i> <sup>e</sup>     | FC:PI                |
| 1203f                     | <i>Humulus lupulus</i> L.                                         | No             | Cannabaceae               | E                         | 30              | 3                | P                            | — <sup>t</sup>         | — <sup>t</sup> | 9.0     | 17.9    | 543                        | O                           | <i>Petunia</i> <sup>e</sup>     | FC:PI                |
| 1204a                     | <i>Hunteria zeylanica</i> (Retz.) Gardner ex Thwaites             | No             | Apocynaceae               | E                         | — <sup>n</sup>  | — <sup>p</sup>   | P                            | 685                    | 0.7            | 1.4     | 2.8     | 501 <sup>ag</sup>          | O                           | B <sup>c</sup>                  | Fe                   |
| 1205a                     | <i>Hypericum canariense</i> L.                                    | — <sup>m</sup> | Hypericaceae <sup>k</sup> | E                         | 40 <sup>o</sup> | 4                | P                            | 494                    | 0.5            | 1.0     | 2.0     | 477                        | O                           | <i>Raphanus</i> <sup>e</sup>    | FC:PI                |
| 1206a                     | <i>Hypericum glandulosum</i> Choisy                               | — <sup>m</sup> | Hypericaceae <sup>k</sup> | E                         | 18 <sup>o</sup> | 2                | P                            | 333                    | 0.3            | 0.7     | 1.4     | 552                        | O                           | <i>Raphanus</i> <sup>e</sup>    | FC:PI                |
| 1207a                     | <i>Hypericum grandifolium</i> Choisy                              | — <sup>m</sup> | Hypericaceae <sup>k</sup> | E                         | 40 <sup>o</sup> | 4                | P                            | 396                    | 0.4            | 0.8     | 1.6     | 477                        | O                           | <i>Raphanus</i> <sup>e</sup>    | FC:PI                |
| 1208a                     | <i>Hypericum reflexum</i> L.f.                                    | — <sup>m</sup> | Hypericaceae <sup>k</sup> | E                         | 18 <sup>o</sup> | 2                | P                            | 328                    | 0.3            | 0.7     | 1.3     | 552                        | O                           | <i>Raphanus</i> <sup>e</sup>    | FC:PI                |
| 1209a                     | <i>Hypochaeris oligocephala</i> (Svent. & Bramw.) Lack            | — <sup>m</sup> | Asteraceae <sup>j</sup>   | E                         | 6 <sup>o</sup>  | 2                | P                            | 1,115                  | 1.1            | 2.3     | 4.6     | 477                        | O                           | <i>Solan.</i> <sup>e</sup>      | FC:PI                |
| 1210b                     | <i>Hyssopus officinalis</i> L.                                    | Yes            | Lamiaceae <sup>j</sup>    | E                         | — <sup>n</sup>  | — <sup>p</sup>   | P                            | 548                    | 0.6            | 1.1     | 2.2     | 492                        | O                           | <i>Raphanus</i> <sup>e</sup>    | FC:PI                |
| 1211a                     | <i>Iberis gibraltaria</i> L.                                      | Yes            | Brassicaceae <sup>j</sup> | E                         | 14              | 2                | — <sup>q</sup>               | 557                    | 0.6            | 1.1     | 2.3     | 599                        | O                           | L                               | FC:PI                |
| 1212a                     | <i>Iberis sempervirens</i> L.                                     | Yes            | Brassicaceae <sup>j</sup> | E                         | 22 <sup>o</sup> | — <sup>p</sup>   | — <sup>q</sup>               | 548                    | 0.6            | 1.1     | 2.2     | 599                        | O                           | L                               | FC:PI                |
| 1213b                     | <i>Ilex aquifolium</i> <sup>l</sup>                               | No             | Aquifoliaceae             | E                         | — <sup>n</sup>  | — <sup>p</sup>   | P                            | 944                    | 1.0            | 1.9     | 3.9     | 563                        | O                           | <i>Glycine</i> <sup>e</sup>     | FC:PI                |
| 1213c                     | <i>Ilex aquifolium</i> L.                                         | Yes            | Aquifoliaceae             | E                         | — <sup>n</sup>  | — <sup>p</sup>   | P                            | 3,051                  | 3.1            | 6.2     | 12.5    | 489                        | O                           | — <sup>w</sup>                  | FC:EB                |
| 1214a                     | <i>Imperata cheesemanii</i> Hack.                                 | Yes            | Poaceae <sup>j</sup>      | M                         | 20              | 2                | P                            | 709                    | 0.7            | 1.5     | 2.9     | 528                        | O                           | — <sup>w</sup>                  | FC:PI                |
| 1214b                     | <i>Imperata cheesemanii</i> Hack.                                 | Yes            | Poaceae <sup>j</sup>      | M                         | 20              | 2                | P                            | 489                    | 0.5            | 1.0     | 2.0     | 476                        | O                           | <i>Actinidia</i> <sup>e</sup>   | FC:PI                |
| 1215a                     | <i>Inula crithmoides</i> L.                                       | Yes            | Asteraceae <sup>j</sup>   | E                         | 18 <sup>o</sup> | 2                | P                            | 1,775                  | 1.8            | 3.6     | 7.3     | 580                        | O                           | G <sup>c</sup>                  | CIA                  |
| 1216c                     | <i>Ipomoea purpurea</i> <sup>l</sup>                              | No             | Convolvulaceae            | E                         | 30 <sup>o</sup> | — <sup>p</sup>   | — <sup>q</sup>               | 738                    | 0.8            | 1.5     | 3.0     | 568                        | O                           | — <sup>w</sup>                  | FC:PI                |

|       |                                                                                                              |                |                           |   |                |                |                |       |      |      |      |                   |   |                               |       |
|-------|--------------------------------------------------------------------------------------------------------------|----------------|---------------------------|---|----------------|----------------|----------------|-------|------|------|------|-------------------|---|-------------------------------|-------|
| 1217a | <i>Iris brevicaulis</i> Randolph                                                                             | – <sup>m</sup> | Iridaceae                 | M | – <sup>n</sup> | – <sup>p</sup> | P              | 9,658 | 9.9  | 19.8 | 39.5 | 551               | O | B                             | FC:PI |
| 1218a | <i>Iris fulva</i> Walter                                                                                     | – <sup>m</sup> | Iridaceae                 | M | – <sup>n</sup> | – <sup>p</sup> | P              | 9,570 | 9.8  | 19.6 | 39.1 | 551               | O | B                             | FC:PI |
| 1219a | <i>Iris hexagona</i> Ker Gawl.                                                                               | – <sup>m</sup> | Iridaceae                 | M | – <sup>n</sup> | – <sup>p</sup> | P              | 9,580 | 9.8  | 19.6 | 39.2 | 551               | O | B                             | FC:PI |
| 1220a | <i>Iris nelsonii</i> Raf.                                                                                    | – <sup>m</sup> | Iridaceae                 | M | – <sup>n</sup> | – <sup>p</sup> | P              | 9,800 | 10.0 | 20.0 | 40.1 | 551               | O | B                             | FC:PI |
| 1221a | <i>Isachne globosa</i> (Thunb.) Kuntze                                                                       | Yes            | Poaceae <sup>j</sup>      | M | 60°            | 6              | P              | 1,780 | 1.8  | 3.6  | 7.3  | 528               | O | – <sup>w</sup>                | FC:PI |
| 1221b | <i>Isachne globosa</i> (Thunb.) Kuntze                                                                       | Yes            | Poaceae <sup>j</sup>      | M | 60             | 6              | P              | 1,223 | 1.3  | 2.5  | 5.0  | 476               | O | <i>Actinidia</i> <sup>c</sup> | FC:PI |
| 1222a | <i>Isatis tinctoria</i> L.                                                                                   | Yes            | Brassicaceae <sup>j</sup> | E | 28             | – <sup>p</sup> | – <sup>q</sup> | 567   | 0.6  | 1.2  | 2.3  | 599               | O | L                             | FC:PI |
| 1223a | <i>Isonandra villosa</i> Blume                                                                               | No             | Sapotaceae                | E | – <sup>n</sup> | – <sup>p</sup> | P              | 2,513 | 2.6  | 5.1  | 10.3 | 501 <sup>ag</sup> | O | B <sup>c</sup>                | Fe    |
| 1224a | <i>Isoplexis canariensis</i> (L.) Loud.                                                                      | – <sup>m</sup> | Plantaginaceae            | E | 56°            | 8              | P              | 973   | 1.0  | 2.0  | 4.0  | 477               | O | <i>Glycine</i> <sup>e</sup>   | FC:PI |
| 1225a | <i>Isoplexis chalcantha</i> Svent. & O'Shan.                                                                 | – <sup>m</sup> | Plantaginaceae            | E | 56             | 8              | P              | 993   | 1.0  | 2.0  | 4.1  | 552               | O | <i>Glycine</i> <sup>e</sup>   | FC:PI |
| 1226a | <i>Ixanthus viscosus</i> (Sm.) Griseb.                                                                       | –              | Gentianaceae              | E | c. 70          | c. 10          | P              | 1,017 | 1.0  | 2.1  | 4.2  | 552               | O | <i>Glycine</i> <sup>e</sup>   | FC:PI |
| 1227a | <i>Jacaranda cuspidifolia</i> Mart. ex A.DC.                                                                 | No             | Bignoniaceae              | E | – <sup>n</sup> | – <sup>p</sup> | P              | 1,271 | 1.3  | 2.6  | 5.2  | 501 <sup>ag</sup> | O | B <sup>c</sup>                | Fe    |
| 1228a | <i>Jacquinia aculeate</i> (L.) Mez                                                                           | No             | Primulaceae <sup>k</sup>  | E | – <sup>n</sup> | – <sup>p</sup> | P              | 1,042 | 1.1  | 2.1  | 4.3  | 501 <sup>ag</sup> | O | B <sup>c</sup>                | Fe    |
| 1229a | <i>Jasminum odoratissimum</i> L.                                                                             | – <sup>m</sup> | Oleaceae                  | E | 26°            | ≥ 2            | P              | 1,403 | 1.4  | 2.9  | 5.7  | 552               | O | <i>Glycine</i> <sup>e</sup>   | FC:PI |
| 1230a | <i>Jatropha curcas</i> L.                                                                                    | – <sup>m</sup> | Euphorbiaceae             | E | 22             | 2              | P              | 416   | 0.4  | 0.9  | 1.7  | 561               | O | <i>Raphanus</i> <sup>c</sup>  | FC:PI |
| 1231a | <i>Juglans regia</i> L.                                                                                      | Yes            | Juglandaceae              | E | – <sup>n</sup> | – <sup>p</sup> | P              | 606   | 0.6  | 1.2  | 2.5  | 489               | O | – <sup>w</sup>                | FC:EB |
| 1232a | <i>Juncus biglumis</i> L.                                                                                    | Yes            | Juncaceae                 | M | 60             | – <sup>p</sup> | P              | 553   | 0.6  | 1.1  | 2.3  | 541               | O | <i>Solan.</i> <sup>c</sup>    | FC:PI |
| 1233a | <i>Juncus biglumis</i> L.                                                                                    | Yes            | Juncaceae                 | M | 120            | – <sup>p</sup> | P              | 597   | 0.6  | 1.2  | 2.4  | 541               | O | <i>Solan.</i> <sup>c</sup>    | FC:PI |
| 1234a | <i>Justicia hyssopifolia</i> L.                                                                              | –              | Acanthaceae               | E | c. 70          | c. 10          | P              | 2,841 | 2.9  | 5.8  | 11.6 | 552               | O | G <sup>c</sup>                | FC:PI |
| 1235a | <i>Kaempferia scaposa</i> (Nimmo) Benth. (= <i>Curcuma scaposa</i> (Nimmo) Škorničk. & M.Sabu comb. nov.)    | Yes            | Zingiberaceae             | M | 42             | 6              | P              | 1,139 | 1.2  | 2.3  | 4.7  | 562               | O | <i>Glycine</i> <sup>e</sup>   | FC:PI |
| 1236a | <i>Kaschgaria brachanthemoides</i> (C.Winkl.) Poljakov                                                       | Yes            | Asteraceae <sup>j</sup>   | E | 18°            | 2              | P              | 6,890 | 7.0  | 14.1 | 28.2 | 521               | O | G <sup>c</sup>                | FC:PI |
| 1237a | <i>Kernera saxatilis</i> (L.) Reichb.                                                                        | Yes            | Brassicaceae <sup>j</sup> | E | 16°            | 2              | – <sup>q</sup> | 196   | 0.2  | 0.4  | 0.8  | 599               | O | L                             | FC:PI |
| 1238a | <i>Kickxia scoaria</i> (Brouss. ex Spreng.) G.Kunkel & Sunding                                               | – <sup>m</sup> | Plantaginaceae            | E | 18°            | 2              | A              | 914   | 0.9  | 1.9  | 3.7  | 552               | O | <i>Glycine</i> <sup>e</sup>   | FC:PI |
| 1239a | <i>Kleinia nerifolia</i> Haw.                                                                                | – <sup>m</sup> | Asteraceae <sup>j</sup>   | E | 20°            | 2              | P              | 8,846 | 9.0  | 18.1 | 36.2 | 552               | O | G <sup>c</sup>                | FC:PI |
| 1240a | <i>Koeleria</i> aff. <i>cheesemani</i> <sup>1</sup>                                                          | Yes            | Poaceae <sup>j</sup>      | M | 28             | 4              | P              | 6,469 | 6.6  | 13.2 | 26.5 | 528               | O | – <sup>w</sup>                | FC:PI |
| 1241a | <i>Koeleria</i> aff. <i>novozelandica</i> <sup>1</sup>                                                       | Yes            | Poaceae <sup>j</sup>      | M | 28             | 4              | P              | 5,090 | 5.2  | 10.4 | 20.8 | 528               | O | – <sup>w</sup>                | FC:PI |
| 1242a | <i>Koeleria cheesemani</i> (Hack.) Petrie                                                                    | Yes            | Poaceae <sup>j</sup>      | M | 28             | 4              | P              | 4,866 | 5.0  | 10.0 | 19.9 | 528               | O | – <sup>w</sup>                | FC:PI |
| 1243a | <i>Koeleria glauca</i> (Spreng.) DC.                                                                         | Yes            | Poaceae <sup>j</sup>      | M | 14             | 2              | P              | 2,543 | 2.6  | 5.2  | 10.4 | 533               | O | E <sup>c</sup>                | FC:PI |
| 1244a | <i>Koeleria macrantha</i> (Schur) Travnicek & Pecinka ined. subsp. <i>macrantha</i> var. <i>pseudoglauca</i> | Yes            | Poaceae <sup>j</sup>      | M | 14             | 2              | P              | 2,372 | 2.4  | 4.9  | 9.7  | 533               | O | E <sup>c</sup>                | FC:PI |

Continued

| Entry number <sup>g</sup> | Species                                                                                                      | Voucher | Family               | Higher group <sup>h</sup> | 2n <sup>‡</sup> | Ploidy level (x) | Life cycle type <sup>s</sup> | DNA amount             |         |         |         | Original ref. <sup>a</sup> | Present amount <sup>†</sup> | Standard species <sup>*b1</sup> | Method <sup>††</sup> |
|---------------------------|--------------------------------------------------------------------------------------------------------------|---------|----------------------|---------------------------|-----------------|------------------|------------------------------|------------------------|---------|---------|---------|----------------------------|-----------------------------|---------------------------------|----------------------|
|                           |                                                                                                              |         |                      |                           |                 |                  |                              | 1C (Mbp <sup>s</sup> ) | 1C (pg) | 2C (pg) | 4C (pg) |                            |                             |                                 |                      |
| 1244b                     | <i>Koeleria macrantha</i> (Ledeb.) Schult. subsp. <i>macrantha</i> var. <i>macrantha</i>                     | Yes     | Poaceae <sup>i</sup> | M                         | 14              | 2                | P                            | 2,421                  | 2.5     | 5.0     | 9.9     | 533                        | O                           | E <sup>c</sup>                  | FC:PI                |
| 1245a                     | <i>Koeleria macrantha</i> (Borbas) Travnicek & Pecinka ined. subsp. <i>macrantha</i> var. <i>majoriflora</i> | Yes     | Poaceae <sup>i</sup> | M                         | 28              | 4                | P                            | 4,553                  | 4.7     | 9.3     | 18.6    | 533                        | O                           | E <sup>c</sup>                  | FC:PI                |
| 1246a                     | <i>Koeleria novozelandica</i> Domin s.s.                                                                     | Yes     | Poaceae <sup>i</sup> | M                         | 28              | 4                | P                            | 4,802                  | 4.9     | 9.8     | 19.6    | 528                        | O                           | – <sup>w</sup>                  | FC:PI                |
| 1246b                     | <i>Koeleria novozelandica</i> Domin s.s.                                                                     | Yes     | Poaceae <sup>i</sup> | M                         | 28              | 4                | P                            | 2,885                  | 3.0     | 5.9     | 11.8    | 476                        | O                           | Actinidia <sup>c</sup>          | FC:PI                |
| 1247a                     | <i>Koeleria pyramidata</i> (Lam.) Beauv.                                                                     | Yes     | Poaceae <sup>i</sup> | M                         | 70              | 10               | P                            | 11,193                 | 11.4    | 22.9    | 45.8    | 533                        | O                           | E <sup>c</sup>                  | FC:PI                |
| 1248a                     | <i>Koeleria tristis</i> Domin                                                                                | Yes     | Poaceae <sup>i</sup> | M                         | c. 84           | 12               | P                            | 14,293                 | 14.6    | 29.2    | 58.5    | 533                        | O                           | E <sup>c</sup>                  | FC:PI                |
| 1249a                     | <i>Koelreuteria apiculata</i> Rehder & E.H.Wilson                                                            | No      | Sapindaceae          | E                         | – <sup>n</sup>  | – <sup>p</sup>   | P                            | 440                    | 0.5     | 0.9     | 1.8     | 501 <sup>ag</sup>          | O                           | B <sup>c</sup>                  | Fe                   |
| 1250a                     | <i>Lachnagrostis ammobia</i> Edgar                                                                           | Yes     | Poaceae <sup>i</sup> | M                         | 98              | 14               | P                            | 12,460                 | 12.7    | 25.5    | 51.0    | 528                        | O                           | – <sup>w</sup>                  | FC:PI                |
| 1251a                     | <i>Lachnagrostis billardierei</i> (R.Br.) Trin.                                                              | Yes     | Poaceae <sup>i</sup> | M                         | 56              | 8                | P                            | 8,924                  | 9.1     | 18.3    | 36.5    | 528                        | O                           | – <sup>w</sup>                  | FC:PI                |
| 1251b                     | <i>Lachnagrostis billardierei</i> (R.Br.) Trin.                                                              | Yes     | Poaceae <sup>i</sup> | M                         | 56              | 8                | P                            | 4,108                  | 4.2     | 8.4     | 16.8    | 476                        | O                           | Actinidia <sup>c</sup>          | FC:PI                |
| 1252a                     | <i>Lachnagrostis elata</i> Edgar                                                                             | Yes     | Poaceae <sup>i</sup> | M                         | 98              | 14               | P                            | 13,110                 | 13.4    | 26.8    | 53.6    | 528                        | O                           | – <sup>w</sup>                  | FC:PI                |
| 1253a                     | <i>Lachnagrostis filiformis</i> (G.Forst) Trin.                                                              | Yes     | Poaceae <sup>i</sup> | M                         | 56              | 8                | AP                           | 6,147                  | 6.3     | 12.6    | 25.1    | 528                        | O                           | – <sup>w</sup>                  | FC:PI                |
| 1254a                     | <i>Lachnagrostis leptostachys</i> (Hook.f.) Zotov <sup>i</sup>                                               | Yes     | Poaceae <sup>i</sup> | M                         | 84              | 12               | P                            | 12,328                 | 12.6    | 25.2    | 50.4    | 528                        | O                           | – <sup>w</sup>                  | FC:PI                |
| 1255a                     | <i>Lachnagrostis littoralis</i> (Hack.) Edgar subsp. <i>littoralis</i> <sup>i</sup>                          | Yes     | Poaceae <sup>i</sup> | M                         | 56              | 8                | A                            | 6,587                  | 6.7     | 13.5    | 26.9    | 528                        | O                           | – <sup>w</sup>                  | FC:PI                |
| 1255b                     | <i>Lachnagrostis littoralis</i> (Hack.) Edgar subsp. <i>littoralis</i> <sup>i</sup>                          | Yes     | Poaceae <sup>i</sup> | M                         | 56              | 8                | A                            | 7,491                  | 7.7     | 15.3    | 30.6    | 528                        | O                           | – <sup>w</sup>                  | FC:PI                |
| 1255c                     | <i>Lachnagrostis littoralis</i> (Hack.) Edgar subsp. <i>salaria</i> <sup>i</sup>                             | Yes     | Poaceae <sup>i</sup> | M                         | 56              | 8                | A                            | 8,176                  | 8.4     | 16.7    | 33.4    | 528                        | O                           | – <sup>w</sup>                  | FC:PI                |
| 1256a                     | <i>Lachnagrostis lyallii</i> (Hook.f.) Zotov <sup>i</sup>                                                    | Yes     | Poaceae <sup>i</sup> | M                         | 98              | 14               | P                            | 8,357                  | 8.5     | 17.1    | 34.2    | 528                        | O                           | – <sup>w</sup>                  | FC:PI                |
| 1256b                     | <i>Lachnagrostis lyallii</i> (Hook.f.) Zotov <sup>i</sup>                                                    | Yes     | Poaceae <sup>i</sup> | M                         | 98              | 14               | P                            | 11,477                 | 11.7    | 23.5    | 46.9    | 528                        | O                           | – <sup>w</sup>                  | FC:PI                |
| 1256c                     | <i>Lachnagrostis lyallii</i> (Hook.f.) Zotov                                                                 | Yes     | Poaceae <sup>i</sup> | M                         | 98              | 14               | P                            | 3,325                  | 3.4     | 6.8     | 13.6    | 476                        | O                           | Actinidia <sup>c</sup>          | FC:PI                |
| 1257b                     | <i>Lachnagrostis pilosa</i> (Buchanan) Edgar subsp. <i>pilosa</i>                                            | Yes     | Poaceae <sup>i</sup> | M                         | 56              | 8                | P                            | 4,010                  | 4.1     | 8.2     | 16.4    | 476                        | O                           | Actinidia <sup>c</sup>          | FC:PI                |



|       |                                                                                          |                |                         |   |                |                |                |        |      |      |      |     |   |                               |         |
|-------|------------------------------------------------------------------------------------------|----------------|-------------------------|---|----------------|----------------|----------------|--------|------|------|------|-----|---|-------------------------------|---------|
| 1258a | <i>Lachnagrostis pilosa</i> (Buchanan) Edgar subsp. <i>pilosa</i> <sup>i</sup>           | Yes            | Poaceae <sup>j</sup>    | M | 98             | 14             | P              | 12,059 | 12.3 | 24.7 | 49.3 | 528 | O | – <sup>w</sup>                | FC:PI   |
| 1258c | <i>Lachnagrostis pilosa</i> (Buchanan) Edgar subsp. <i>pilosa</i>                        | Yes            | Poaceae <sup>j</sup>    | M | 98             | 14             | P              | 4,890  | 5.0  | 10.0 | 20.0 | 476 | O | <i>Actinidia</i> <sup>c</sup> | FC:PI   |
| 1259a | <i>Lachnagrostis striata</i> (Colenso) Zotov                                             | Yes            | Poaceae <sup>j</sup>    | M | 84             | 12             | P              | 4,597  | 4.7  | 9.4  | 18.8 | 476 | O | <i>Actinidia</i> <sup>c</sup> | FC:PI   |
| 1260a | <i>Lachnagrostis uda</i> Edgar                                                           | Yes            | Poaceae <sup>j</sup>    | M | 98             | 14             | P              | 12,470 | 12.8 | 25.5 | 51.0 | 528 | O | – <sup>w</sup>                | FC:PI   |
| 1261a | <i>Lactuca aculeata</i> Boiss. & Ky.                                                     | No             | Asteraceae <sup>j</sup> | E | 18             | 2              | – <sup>q</sup> | 2,685  | 2.7  | 5.5  | 11.0 | 608 | O | <i>Lactuca</i> <sup>e</sup>   | FC:DAPI |
| 1262a | <i>Lactuca alpina</i> (L.) Gray                                                          | No             | Asteraceae <sup>j</sup> | E | 18             | 2              | – <sup>q</sup> | 2,910  | 3.0  | 6.0  | 11.9 | 608 | O | <i>Lactuca</i> <sup>e</sup>   | FC:DAPI |
| 1263a | <i>Lactuca altaica</i> Fisch. & Mey.                                                     | No             | Asteraceae <sup>j</sup> | E | 18             | 2              | – <sup>q</sup> | 3,022  | 3.1  | 6.2  | 12.4 | 608 | O | <i>Lactuca</i> <sup>e</sup>   | FC:DAPI |
| 1264a | <i>Lactuca angustana</i> All.                                                            | No             | Asteraceae <sup>j</sup> | E | 18             | 2              | – <sup>q</sup> | 3,198  | 3.3  | 6.5  | 13.1 | 608 | O | <i>Lactuca</i> <sup>e</sup>   | FC:DAPI |
| 1265a | <i>Lactuca biennis</i> (Moench) Fernald                                                  | No             | Asteraceae <sup>j</sup> | E | 34             | 4              | – <sup>q</sup> | 7,990  | 8.2  | 16.3 | 32.7 | 608 | O | <i>Lactuca</i> <sup>e</sup>   | FC:DAPI |
| 1266a | <i>Lactuca canadensis</i> L.                                                             | No             | Asteraceae <sup>j</sup> | E | 34             | 4              | – <sup>q</sup> | 8,782  | 9.0  | 18.0 | 35.9 | 608 | O | <i>Lactuca</i> <sup>e</sup>   | FC:DAPI |
| 1267a | <i>Lactuca capensis</i> Thunb.                                                           | No             | Asteraceae <sup>j</sup> | E | 16             | 2              | – <sup>q</sup> | 988    | 1.0  | 2.0  | 4.0  | 608 | O | <i>Lactuca</i> <sup>e</sup>   | FC:DAPI |
| 1268a | <i>Lactuca dentata</i> L. (Thunb.)                                                       | No             | Asteraceae <sup>j</sup> | E | 18             | 2              | – <sup>q</sup> | 3,125  | 3.2  | 6.4  | 12.8 | 608 | O | <i>Lactuca</i> <sup>e</sup>   | FC:DAPI |
| 1269a | <i>Lactuca denticulata</i> (Houtt.) Maxim.                                               | No             | Asteraceae <sup>j</sup> | E | 18             | 2              | – <sup>q</sup> | 3,100  | 3.2  | 6.3  | 12.7 | 608 | O | <i>Lactuca</i> <sup>e</sup>   | FC:DAPI |
| 1270a | <i>Lactuca dregeana</i> DC.                                                              | No             | Asteraceae <sup>j</sup> | E | 18             | 2              | – <sup>q</sup> | 2,963  | 3.0  | 6.1  | 12.1 | 608 | O | <i>Lactuca</i> <sup>e</sup>   | FC:DAPI |
| 1271a | <i>Lactuca homblei</i> De Willd.                                                         | No             | Asteraceae <sup>j</sup> | E | 18             | 2              | – <sup>q</sup> | 4,768  | 4.9  | 9.8  | 19.5 | 608 | O | <i>Lactuca</i> <sup>e</sup>   | FC:DAPI |
| 1272a | <i>Lactuca indica</i> L. <sup>i</sup>                                                    | No             | Asteraceae <sup>j</sup> | E | 18             | 2              | – <sup>q</sup> | 5,804  | 5.9  | 11.9 | 23.7 | 608 | O | <i>Lactuca</i> <sup>e</sup>   | FC:DAPI |
| 1272b | <i>Lactuca indica</i> L. <sup>i</sup>                                                    | No             | Asteraceae <sup>j</sup> | E | 18             | 2              | – <sup>q</sup> | 6,905  | 7.1  | 14.1 | 28.2 | 608 | O | <i>Lactuca</i> <sup>e</sup>   | FC:DAPI |
| 1273a | <i>Lactuca livida</i> Boiss. & Reut. <sup>i</sup>                                        | No             | Asteraceae <sup>j</sup> | E | 18             | 2              | – <sup>q</sup> | 2,998  | 3.1  | 6.1  | 12.3 | 608 | O | <i>Lactuca</i> <sup>e</sup>   | FC:DAPI |
| 1274a | <i>Lactuca palmensis</i> Bolle                                                           | – <sup>m</sup> | Asteraceae <sup>j</sup> | E | – <sup>n</sup> | 2 <sup>z</sup> | P              | 1,002  | 1.0  | 2.1  | 4.1  | 477 | O | <i>Glycine</i> <sup>e</sup>   | FC:PI   |
| 1275a | <i>Lactuca perennis</i> L.                                                               | No             | Asteraceae <sup>j</sup> | E | 18             | 2              | – <sup>q</sup> | 2,699  | 2.8  | 5.5  | 11.0 | 608 | O | <i>Lactuca</i> <sup>e</sup>   | FC:DAPI |
| 1276a | <i>Lactuca quercina</i> L.                                                               | No             | Asteraceae <sup>j</sup> | E | 18             | 2              | – <sup>q</sup> | 4,259  | 4.4  | 8.7  | 17.4 | 608 | O | <i>Lactuca</i> <sup>e</sup>   | FC:DAPI |
| 1277a | <i>Lactuca saligna</i> L.                                                                | No             | Asteraceae <sup>j</sup> | E | 18             | 2              | – <sup>q</sup> | 2,328  | 2.4  | 4.8  | 9.5  | 608 | O | <i>Lactuca</i> <sup>e</sup>   | FC:DAPI |
| 1278f | <i>Lactuca sativa</i> L.                                                                 | Yes            | Asteraceae <sup>j</sup> | E | – <sup>n</sup> | – <sup>p</sup> | AB             | 3,232  | 3.3  | 6.6  | 13.2 | 492 | O | <i>Glycine</i> <sup>e</sup>   | FC:PI   |
| 1279b | <i>Lactuca serriola</i> f. <i>serriola</i> L.                                            | No             | Asteraceae <sup>j</sup> | E | 18             | 2              | B              | 2,729  | 2.8  | 5.6  | 11.2 | 608 | O | <i>Lactuca</i> <sup>e</sup>   | FC:DAPI |
| 1279c | <i>Lactuca serriola</i> f. <i>integrifolia</i> L.                                        | No             | Asteraceae <sup>j</sup> | E | 18             | 2              | B              | 3,110  | 3.2  | 6.4  | 12.7 | 608 | O | <i>Lactuca</i> <sup>e</sup>   | FC:DAPI |
| 1280a | <i>Lactuca sibirica</i> (L.) Benth. ex Maxim.                                            | No             | Asteraceae <sup>j</sup> | E | – <sup>n</sup> | – <sup>p</sup> | – <sup>q</sup> | 4,142  | 4.2  | 8.5  | 16.9 | 608 | O | <i>Lactuca</i> <sup>e</sup>   | FC:DAPI |
| 1281a | <i>Lactuca squarrosa</i> (Thunb.) Miq.                                                   | No             | Asteraceae <sup>j</sup> | E | 18             | 2              | – <sup>q</sup> | 3,188  | 3.3  | 6.5  | 13.0 | 608 | O | <i>Lactuca</i> <sup>e</sup>   | FC:DAPI |
| 1282a | <i>Lactuca taraxacifolia</i> Chalk.                                                      | No             | Asteraceae <sup>j</sup> | E | 18             | 2              | – <sup>q</sup> | 1,501  | 1.5  | 3.1  | 6.1  | 608 | O | <i>Lactuca</i> <sup>e</sup>   | FC:DAPI |
| 1283a | <i>Lactuca tatarica</i> (L.) C.A.Mey.                                                    | No             | Asteraceae <sup>j</sup> | E | 18             | 2              | – <sup>q</sup> | 4,504  | 4.6  | 9.2  | 18.4 | 608 | O | <i>Lactuca</i> <sup>e</sup>   | FC:DAPI |
| 1284a | <i>Lactuca tenerrima</i> Pourr.                                                          | No             | Asteraceae <sup>j</sup> | E | 16             | 2              | – <sup>q</sup> | 1,149  | 1.2  | 2.4  | 4.7  | 608 | O | <i>Lactuca</i> <sup>e</sup>   | FC:DAPI |
| 1285a | <i>Lactuca viminea</i> (L.) J. & C. Presl subsp. <i>chondrilliflora</i> (Boreau) Bonnier | No             | Asteraceae <sup>j</sup> | E | 18             | 2              | – <sup>q</sup> | 2,240  | 2.3  | 4.6  | 9.2  | 608 | O | <i>Lactuca</i> <sup>e</sup>   | FC:DAPI |
| 1286a | <i>Lactuca virosa</i> L. var. <i>virosa</i>                                              | No             | Asteraceae <sup>j</sup> | E | 18             | 2              | – <sup>q</sup> | 3,672  | 3.8  | 7.5  | 15.0 | 608 | O | <i>Lactuca</i> <sup>e</sup>   | FC:DAPI |
| 1286b | <i>Lactuca virosa</i> L. var. <i>virosa</i>                                              | No             | Asteraceae <sup>j</sup> | E | 18             | 2              | – <sup>q</sup> | 4,284  | 4.4  | 8.8  | 17.5 | 608 | O | <i>Lactuca</i> <sup>e</sup>   | FC:DAPI |

Continued

| Entry number <sup>g</sup> | Species                                                      | Voucher          | Family                    | Higher group <sup>#</sup> | 2n <sup>‡</sup> | Ploidy level (x) | Life cycle type <sup>§</sup> | DNA amount             |                |         |         | Original ref. <sup>a</sup> | Present amount <sup>†</sup> | Standard species <sup>*b1</sup> | Method <sup>††</sup> |
|---------------------------|--------------------------------------------------------------|------------------|---------------------------|---------------------------|-----------------|------------------|------------------------------|------------------------|----------------|---------|---------|----------------------------|-----------------------------|---------------------------------|----------------------|
|                           |                                                              |                  |                           |                           |                 |                  |                              | 1C (Mbp <sup>s</sup> ) | 1C (pg)        | 2C (pg) | 4C (pg) |                            |                             |                                 |                      |
| 1287a                     | <i>Lagenaria siceraria</i> (Molina) Standley <sup>h</sup>    | No <sup>m1</sup> | Cucurbitaceae             | E                         | 22              | 2                | A                            | 334                    | 0.3            | 0.7     | 1.4     | 583                        | O                           | <i>Raphanus</i> <sup>e</sup>    | FC:PI                |
| 1287b                     | <i>Lagenaria siceraria</i> (Molina) Standley <sup>h</sup>    | No <sup>m1</sup> | Cucurbitaceae             | E                         | 22              | 2                | A                            | 379                    | 0.4            | 0.8     | 1.6     | 583                        | O                           | <i>Raphanus</i> <sup>e</sup>    | FC:PI                |
| 1288a                     | <i>Lambertia formosa</i> Sm.                                 | – <sup>m</sup>   | Proteaceae                | E                         | – <sup>n</sup>  | – <sup>p</sup>   | – <sup>q</sup>               | 973                    | 1.0            | 2.0     | 4.0     | 526                        | O                           | A                               | FC:PI                |
| 1289a                     | <i>Lamium argentatum</i> (Smejkal) Henker ex G.H.Loos        | Yes              | Lamiaceae <sup>j</sup>    | E                         | 36              | 4                | P                            | 3,095                  | 3.2            | 6.3     | 12.7    | 591                        | O                           | <i>Glycine</i> <sup>e</sup>     | FC:PI                |
| 1290a                     | <i>Lamium flavidum</i> F.Herm.                               | Yes              | Lamiaceae <sup>j</sup>    | E                         | 18              | 2                | P                            | 1,667                  | 1.7            | 3.4     | 6.8     | 591                        | O                           | <i>Glycine</i> <sup>e</sup>     | FC:PI                |
| 1291a                     | <i>Lamium galeobdolon</i> (L.) L.                            | Yes              | Lamiaceae <sup>j</sup>    | E                         | 18              | 2                | P                            | 1,599                  | 1.6            | 3.3     | 6.5     | 591                        | O                           | <i>Glycine</i> <sup>e</sup>     | FC:PI                |
| 1292a                     | <i>Lamium montanum</i> (Pers.) Rchb.                         | Yes              | Lamiaceae <sup>j</sup>    | E                         | 36              | 4                | P                            | 3,110                  | 3.2            | 6.4     | 12.7    | 591                        | O                           | <i>Glycine</i> <sup>e</sup>     | FC:PI                |
| 1293a                     | <i>Lansea coromandelica</i> (Houtt.) Merr                    | No               | Anacardiaceae             | E                         | 30 <sup>o</sup> | 2                | P                            | 736                    | 0.8            | 1.5     | 3.0     | 501 <sup>ag</sup>          | O                           | B <sup>c</sup>                  | Fe                   |
| 1294a                     | <i>Lansea grandis</i> (Dennst.) Engl.                        | No               | Anacardiaceae             | E                         | – <sup>n</sup>  | – <sup>p</sup>   | P                            | 611                    | 0.6            | 1.3     | 2.5     | 501 <sup>ag</sup>          | O                           | B <sup>c</sup>                  | Fe                   |
| 1295e                     | <i>Lathyrus articulatus</i> L.                               | Yes              | Fabaceae <sup>j</sup>     | E                         | 14 <sup>o</sup> | 2                | A                            | 5,624                  | 5.8            | 11.5    | 23.0    | 554                        | O                           | G <sup>c</sup>                  | FC:PI                |
| 1296b                     | <i>Laurus nobilis</i> L.                                     | Yes              | Lauraceae                 | BA                        | – <sup>n</sup>  | – <sup>p</sup>   | P                            | 3,301                  | 3.4            | 6.8     | 13.5    | 489                        | O                           | – <sup>w</sup>                  | FC:EB                |
| 1297a                     | <i>Lavandula buchii</i> Webb & Berthel. var. <i>buchii</i>   | – <sup>m</sup>   | Lamiaceae <sup>j</sup>    | E                         | 22 <sup>o</sup> | 2                | P                            | 494                    | 0.5            | 1.0     | 2.0     | 477                        | O                           | <i>Solan.</i> <sup>e</sup>      | FC:PI                |
| 1298a                     | <i>Lavandula multifida</i> L. subsp. <i>canariensis</i>      | – <sup>m</sup>   | Lamiaceae <sup>j</sup>    | E                         | 22 <sup>o</sup> | 2                | P                            | 499                    | 0.5            | 1.0     | 2.0     | 477                        | O                           | <i>Solan.</i> <sup>e</sup>      | FC:PI                |
| 1299b                     | <i>Leochilus oncioides</i> Knowles & West.                   | Yes              | Orchidaceae               | M                         | – <sup>n</sup>  | – <sup>p</sup>   | P                            | 1,174                  | 1.2            | 2.4     | 4.8     | 504 <sup>ah</sup>          | O                           | – <sup>w</sup>                  | FC:DAPI              |
| 1300a                     | <i>Lepidium apetalum</i> Willd.                              | Yes              | Brassicaceae <sup>j</sup> | E                         | 32 <sup>o</sup> | 4                | – <sup>q</sup>               | 362                    | 0.4            | 0.7     | 1.5     | 599                        | O                           | L                               | FC:PI                |
| 1301a                     | <i>Lepidium latifolium</i> L.                                | Yes              | Brassicaceae <sup>j</sup> | E                         | 40              | – <sup>p</sup>   | – <sup>q</sup>               | 1,017                  | 1.0            | 2.1     | 4.2     | 599                        | O                           | L                               | FC:PI                |
| 1302a                     | <i>Lepidium sativum</i> L.                                   | – <sup>m</sup>   | Brassicaceae <sup>j</sup> | E                         | 24              | 3                | A                            | – <sup>t</sup>         | – <sup>t</sup> | 1.2     | 2.3     | 509                        | O                           | – <sup>w</sup>                  | FC:PI                |
| 1303a                     | <i>Lepidium virginicum</i> L.                                | – <sup>m</sup>   | Brassicaceae <sup>j</sup> | E                         | 32              | 4                | – <sup>q</sup>               | 326                    | 0.3            | 0.7     | 1.3     | 509                        | O                           | – <sup>w</sup>                  | FC:PI                |
| 1304a                     | <i>Lepidolopsis turkestanica</i> (Regel & Schmalh.) Poljakov | Yes              | Asteraceae <sup>j</sup>   | E                         | 18 <sup>o</sup> | 2                | P                            | 5,447                  | 5.6            | 11.1    | 22.3    | 521                        | O                           | <i>Petunia</i> <sup>e</sup>     | FC:PI                |
| 1305a                     | <i>Leptocereus quadricostatus</i> Britton & Rose             | Yes              | Cactaceae                 | E                         | 22              | 2                | P                            | 778                    | 0.8            | 1.6     | 3.2     | 557                        | O                           | G <sup>c</sup>                  | FC:PI                |
| 1306a                     | <i>Leucanthemella linearis</i> Matsum.                       | No               | Asteraceae <sup>j</sup>   | E                         | 18              | 2                | A                            | 19,760                 | 20.2           | 40.4    | 80.8    | 570                        | O                           | A <sup>c</sup>                  | FC:PI                |
| 1307a                     | <i>Lilium bosniacum</i> (Beck) Beck ex Fritsch               | Yes              | Liliaceae                 | M                         | 24              | 2                | P                            | 33,169                 | 33.9           | 67.8    | 135.7   | 475                        | O                           | A <sup>c</sup>                  | FC:PI                |
| 1308b                     | <i>Lilium carnolicum</i> Bernh.                              | Yes              | Liliaceae                 | M                         | 24              | 2                | P                            | 32,944                 | 33.7           | 67.4    | 134.7   | 480                        | O                           | A <sup>c</sup>                  | FC:PI                |
| 1309b                     | <i>Lilium longiflorum</i> Thunb. cv. Nellie White            | No               | Liliaceae                 | M                         | 24              | 2                | P                            | 35,827                 | 36.6           | 73.3    | 146.5   | 570                        | O                           | A <sup>c</sup>                  | FC:PI                |
| 1310a                     | <i>Lilium pomponium</i> L.                                   | Yes              | Liliaceae                 | M                         | 24              | 2                | P                            | 34,357                 | 35.1           | 70.3    | 140.5   | 480                        | O                           | A <sup>c</sup>                  | FC:PI                |
| 1311b                     | <i>Lilium pyrenaicum</i> Gouan                               | Yes              | Liliaceae                 | M                         | 24              | 2                | P                            | 33,125                 | 33.9           | 67.7    | 135.5   | 480                        | O                           | A <sup>c</sup>                  | FC:PI                |

|       |                                                                                 |                |                           |   |                |                |                |       |     |      |      |     |   |                             |       |
|-------|---------------------------------------------------------------------------------|----------------|---------------------------|---|----------------|----------------|----------------|-------|-----|------|------|-----|---|-----------------------------|-------|
| 1312a | <i>Limonium angustifolium</i> (Tauch) Degen                                     | Yes            | Plumbaginaceae            | E | 36°            | 4              | P              | 2,474 | 2.5 | 5.1  | 10.1 | 580 | O | G <sup>c</sup>              | CIA   |
| 1313a | <i>Limonium fruticans</i> (Webb) Kuntze                                         | – <sup>m</sup> | Plumbaginaceae            | E | 14°            | 2              | P              | 4,675 | 4.8 | 9.6  | 19.1 | 552 | O | H <sup>c</sup>              | FC:PI |
| 1314a | <i>Limonium macrophyllum</i> (Brouss.) O.Kuntze                                 | – <sup>m</sup> | Plumbaginaceae            | E | 14             | 2              | P              | 5,330 | 5.5 | 10.9 | 21.8 | 477 | O | G <sup>c</sup>              | FC:PI |
| 1315a | <i>Limonium pectinatum</i> (Ait.) O.Kuntze var. <i>pectinatum</i>               | – <sup>m</sup> | Plumbaginaceae            | E | 12°            | 2              | P              | 2,557 | 2.6 | 5.2  | 10.5 | 477 | O | G <sup>c</sup>              | FC:PI |
| 1316a | <i>Lobularia canariensis</i> (Webb) Borgen subsp. <i>palmensis</i>              | – <sup>m</sup> | Brassicaceae <sup>j</sup> | E | 22°            | 2              | P              | 553   | 0.6 | 1.1  | 2.3  | 477 | O | <i>Solan.</i> <sup>e</sup>  | FC:PI |
| 1317a | <i>Lobularia libyaca</i> Meisn.                                                 | Yes            | Brassicaceae <sup>j</sup> | E | 22             | – <sup>p</sup> | – <sup>q</sup> | 518   | 0.5 | 1.1  | 2.1  | 599 | O | L                           | FC:PI |
| 1318a | <i>Lolium multiflorum</i> Lam.                                                  | – <sup>m</sup> | Poaceae <sup>j</sup>      | M | 14°            | 2              | P              | 2,661 | 2.7 | 5.4  | 10.9 | 555 | O | G <sup>c</sup>              | FC:PI |
| 1319a | <i>Lolium perenne</i> L.                                                        | – <sup>m</sup> | Poaceae <sup>j</sup>      | M | 14°            | 2              | P              | 2,695 | 2.8 | 5.5  | 11.0 | 555 | O | G <sup>c</sup>              | FC:PI |
| 1320a | <i>Lolium rigidum</i> Gaudin                                                    | – <sup>m</sup> | Poaceae <sup>j</sup>      | M | 14°            | 2              | P              | 2,687 | 2.7 | 5.5  | 11.0 | 555 | O | G <sup>c</sup>              | FC:PI |
| 1321a | <i>Lolium temulentum</i> L.                                                     | – <sup>m</sup> | Poaceae <sup>j</sup>      | M | 14°            | 2              | P              | 2,796 | 2.9 | 5.7  | 11.4 | 555 | O | G <sup>c</sup>              | FC:PI |
| 1322c | <i>Lonicera periclymenum</i> L. subsp. <i>hispanica</i> (Boiss. & Reuter) Nyman | Yes            | Caprifoliaceae            | E | – <sup>n</sup> | – <sup>p</sup> | P              | 2,748 | 2.8 | 5.6  | 11.2 | 489 | O | – <sup>w</sup>              | FC:EB |
| 1323a | <i>Lotus berthelotii</i> Masf.                                                  | – <sup>m</sup> | Fabaceae <sup>j</sup>     | E | 28°            | 4              | P              | 1,193 | 1.2 | 2.4  | 4.9  | 552 | O | <i>Solan.</i> <sup>e</sup>  | FC:PI |
| 1324a | <i>Lotus campylocladus</i> Webb & Berth.                                        | – <sup>m</sup> | Fabaceae <sup>j</sup>     | E | 14             | 2              | P              | 606   | 0.6 | 1.2  | 2.5  | 477 | O | <i>Solan.</i> <sup>e</sup>  | FC:PI |
| 1325a | <i>Lotus dumetorum</i> Webb ex Murr.                                            | – <sup>m</sup> | Fabaceae <sup>j</sup>     | E | 14             | 2              | P              | 597   | 0.6 | 1.2  | 2.4  | 477 | O | <i>Solan.</i> <sup>e</sup>  | FC:PI |
| 1326a | <i>Lotus glaucus</i> Dryand. in Aiton                                           | – <sup>m</sup> | Fabaceae <sup>j</sup>     | E | 14°            | 2              | P              | 606   | 0.6 | 1.2  | 2.5  | 552 | O | <i>Solan.</i> <sup>e</sup>  | FC:PI |
| 1327a | <i>Lotus glaucus</i> Ait.                                                       | – <sup>m</sup> | Fabaceae <sup>j</sup>     | E | 28             | 4              | P              | 1,213 | 1.2 | 2.5  | 5.0  | 477 | O | <i>Solan.</i> <sup>e</sup>  | FC:PI |
| 1328a | <i>Lotus mascaënsis</i> Burchard                                                | – <sup>m</sup> | Fabaceae <sup>j</sup>     | E | 28°            | 4              | P              | 1,218 | 1.2 | 2.5  | 5.0  | 552 | O | <i>Solan.</i> <sup>e</sup>  | FC:PI |
| 1329a | <i>Lotus sessilifolius</i> DC.                                                  | – <sup>m</sup> | Fabaceae <sup>j</sup>     | E | 28°            | 4              | P              | 1,232 | 1.3 | 2.5  | 5.0  | 552 | O | <i>Solan.</i> <sup>e</sup>  | FC:PI |
| 1330a | <i>Lugoa revoluta</i> (Chr. Sm. in Buch) DC.                                    | – <sup>m</sup> | Asteraceae <sup>j</sup>   | E | 18             | 2              | P              | 5,839 | 6.0 | 11.9 | 23.9 | 477 | O | G <sup>c</sup>              | FC:PI |
| 1331a | <i>Lupinus albicaulis</i> Dougl. ex Hook.                                       | No             | Fabaceae <sup>j</sup>     | E | 48°            | – <sup>p</sup> | P              | 1,311 | 1.3 | 2.7  | 5.4  | 524 | O | G <sup>c</sup>              | FC:PI |
| 1332a | <i>Lupinus albifrons</i> Benth.                                                 | No             | Fabaceae <sup>j</sup>     | E | – <sup>n</sup> | – <sup>p</sup> | P              | 724   | 0.7 | 1.5  | 3.0  | 524 | O | H <sup>c</sup>              | FC:PI |
| 1333c | <i>Lupinus albus</i> L.                                                         | No             | Fabaceae <sup>j</sup>     | E | 50°            | 2              | A              | 567   | 0.6 | 1.2  | 2.3  | 520 | O | <i>Petunia</i> <sup>e</sup> | FC:PI |
| 1334c | <i>Lupinus angustifolius</i> L.                                                 | No             | Fabaceae <sup>j</sup>     | E | 40°            | 2              | A              | 924   | 0.9 | 1.9  | 3.8  | 520 | O | <i>Petunia</i> <sup>e</sup> | FC:PI |
| 1335b | <i>Lupinus arboreus</i> Sims                                                    | No             | Fabaceae <sup>j</sup>     | E | 48°            | – <sup>p</sup> | P              | 851   | 0.9 | 1.7  | 3.5  | 524 | O | <i>Petunia</i> <sup>e</sup> | FC:PI |
| 1336a | <i>Lupinus arbustus</i> Douglas ex Lindl.                                       | No             | Fabaceae <sup>j</sup>     | E | – <sup>n</sup> | – <sup>p</sup> | P              | 680   | 0.7 | 1.4  | 2.8  | 524 | O | H <sup>c</sup>              | FC:PI |
| 1337a | <i>Lupinus argenteus</i> Pursh var. <i>rubricaulis</i> (Greene) S.L.Welsh       | No             | Fabaceae <sup>j</sup>     | E | 48°            | – <sup>p</sup> | P              | 680   | 0.7 | 1.4  | 2.8  | 524 | O | H <sup>c</sup>              | FC:PI |
| 1338a | <i>Lupinus arizonicus</i> (S.Watson) S.Watson                                   | No             | Fabaceae <sup>j</sup>     | E | – <sup>n</sup> | – <sup>p</sup> | A              | 621   | 0.6 | 1.3  | 2.5  | 524 | O | H <sup>c</sup>              | FC:PI |
| 1339a | <i>Lupinus atlanticus</i> Gladst.                                               | No             | Fabaceae <sup>j</sup>     | E | 38°            | 2              | A              | 787   | 0.8 | 1.6  | 3.2  | 520 | O | <i>Petunia</i> <sup>e</sup> | FC:PI |
| 1340a | <i>Lupinus bandelierae</i> C.P.Sm.                                              | No             | Fabaceae <sup>j</sup>     | E | 36°            | – <sup>p</sup> | P              | 675   | 0.7 | 1.4  | 2.8  | 524 | O | <i>Petunia</i> <sup>e</sup> | FC:PI |
| 1341a | <i>Lupinus bracteolaris</i> Desr.                                               | No             | Fabaceae <sup>j</sup>     | E | 32°            | – <sup>p</sup> | A              | 758   | 0.8 | 1.6  | 3.1  | 524 | O | <i>Petunia</i> <sup>e</sup> | FC:PI |
| 1341b | <i>Lupinus bracteolaris</i> Desr.                                               | No             | Fabaceae <sup>j</sup>     | E | 34°            | – <sup>p</sup> | A              | 778   | 0.8 | 1.6  | 3.2  | 524 | O | <i>Petunia</i> <sup>e</sup> | FC:PI |
| 1342a | <i>Lupinus concinnus</i> J.Agardh                                               | No             | Fabaceae <sup>j</sup>     | E | – <sup>n</sup> | – <sup>p</sup> | A              | 553   | 0.6 | 1.1  | 2.3  | 524 | O | <i>Petunia</i> <sup>e</sup> | FC:PI |

Continued

| Entry number <sup>e</sup> | Species                                                                         | Voucher | Family                | Higher group <sup>#</sup> | 2n <sup>‡</sup>        | Ploidy level (x) | Life cycle type <sup>§</sup> | DNA amount             |         |         |         | Original ref. <sup>a</sup> | Present amount <sup>†</sup> | Standard species <sup>*b1</sup>  | Method <sup>††</sup> |
|---------------------------|---------------------------------------------------------------------------------|---------|-----------------------|---------------------------|------------------------|------------------|------------------------------|------------------------|---------|---------|---------|----------------------------|-----------------------------|----------------------------------|----------------------|
|                           |                                                                                 |         |                       |                           |                        |                  |                              | 1C (Mbp <sup>o</sup> ) | 1C (pg) | 2C (pg) | 4C (pg) |                            |                             |                                  |                      |
| 1343a                     | <i>Lupinus cosentinii</i> Guss.                                                 | No      | Fabaceae <sup>j</sup> | E                         | 32 <sup>o</sup>        | 2                | A                            | 694                    | 0.7     | 1.4     | 2.8     | 520                        | O                           | <i>Petunia</i> <sup>c</sup>      | FC:PI                |
| 1344a                     | <i>Lupinus cryptanthus</i> Shuttlew.                                            | No      | Fabaceae <sup>j</sup> | E                         | 40 <sup>o</sup>        | 2                | A                            | 910                    | 0.9     | 1.9     | 3.7     | 520                        | O                           | <i>Petunia</i> <sup>c</sup>      | FC:PI                |
| 1345a                     | <i>Lupinus digitatus</i> Forssk.                                                | No      | Fabaceae <sup>j</sup> | E                         | 36 <sup>o</sup>        | 2                | A                            | 670                    | 0.7     | 1.4     | 2.7     | 520                        | O                           | <i>Petunia</i> <sup>c</sup>      | FC:PI                |
| 1346a                     | <i>Lupinus garfieldensis</i> C.P.Sm.                                            | No      | Fabaceae <sup>j</sup> | E                         | — <sup>n</sup>         | — <sup>p</sup>   | — <sup>q</sup>               | 689                    | 0.7     | 1.4     | 2.8     | 524                        | O                           | H <sup>c</sup>                   | FC:PI                |
| 1347a                     | <i>Lupinus graecus</i> Boiss. & Sprun.                                          | No      | Fabaceae <sup>j</sup> | E                         | 50 <sup>o</sup>        | 2                | A                            | 553                    | 0.6     | 1.1     | 2.3     | 520                        | O                           | <i>Petunia</i> <sup>c</sup>      | FC:PI                |
| 1348a                     | <i>Lupinus guaraniticus</i> (Hassl.) C.P.Sm. <sup>1</sup>                       | No      | Fabaceae <sup>j</sup> | E                         | 36 <sup>o</sup>        | — <sup>p</sup>   | P                            | 846                    | 0.9     | 1.7     | 3.5     | 524                        | O                           | <i>Petunia</i> <sup>c</sup>      | FC:PI                |
| 1349b                     | <i>Lupinus hispanicus</i> Boiss. & Reut. subsp. <i>bicolor</i> (Merino) Gladst. | No      | Fabaceae <sup>j</sup> | E                         | 52 <sup>o</sup>        | 2                | A                            | 1,046                  | 1.1     | 2.1     | 4.3     | 520                        | O                           | <i>Petunia</i> <sup>c</sup>      | FC:PI                |
| 1349c                     | <i>Lupinus hispanicus</i> Boiss. & Reut. subsp. <i>hispanicus</i>               | No      | Fabaceae <sup>j</sup> | E                         | 52 <sup>o</sup>        | 2                | A                            | 1,051                  | 1.1     | 2.2     | 4.3     | 520                        | O                           | <i>Petunia</i> <sup>c</sup>      | FC:PI                |
| 1350a                     | <i>Lupinus lanatus</i> Benth. <sup>i</sup>                                      | No      | Fabaceae <sup>j</sup> | E                         | 36 <sup>o</sup>        | — <sup>p</sup>   | P                            | 885                    | 0.9     | 1.8     | 3.6     | 524                        | O                           | <i>Petunia</i> <sup>c</sup>      | FC:PI                |
| 1351a                     | <i>Lupinus latifolius</i> Lindl. ex J.Agardh                                    | No      | Fabaceae <sup>j</sup> | E                         | — <sup>n</sup>         | — <sup>p</sup>   | P                            | 851                    | 0.9     | 1.7     | 3.5     | 524                        | O                           | <i>Petunia</i> <sup>c</sup>      | FC:PI                |
| 1352a                     | <i>Lupinus lepidus</i> Douglas ex Lindl.                                        | No      | Fabaceae <sup>j</sup> | E                         | 48 <sup>o</sup>        | — <sup>p</sup>   | P                            | 826                    | 0.8     | 1.7     | 3.4     | 524                        | O                           | H <sup>c</sup>                   | FC:PI                |
| 1353a                     | <i>Lupinus leucophyllus</i> Douglas ex Lindl.                                   | No      | Fabaceae <sup>j</sup> | E                         | — <sup>n</sup>         | — <sup>p</sup>   | P                            | 694                    | 0.7     | 1.4     | 2.8     | 524                        | O                           | H <sup>c</sup>                   | FC:PI                |
| 1354a                     | <i>Lupinus linearis</i> Desr.                                                   | No      | Fabaceae <sup>j</sup> | E                         | 32 <sup>o</sup>        | — <sup>p</sup>   | A                            | 694                    | 0.7     | 1.4     | 2.8     | 524                        | O                           | <i>Petunia</i> <sup>c</sup>      | FC:PI                |
| 1354b                     | <i>Lupinus linearis</i> Desr.                                                   | No      | Fabaceae <sup>j</sup> | E                         | 34 <sup>o</sup>        | — <sup>p</sup>   | A                            | 699                    | 0.7     | 1.4     | 2.9     | 524                        | O                           | <i>Petunia</i> <sup>c</sup>      | FC:PI                |
| 1355a                     | <i>Lupinus linifolius</i> Roth.                                                 | No      | Fabaceae <sup>j</sup> | E                         | 40 <sup>o</sup>        | 2                | A                            | 919                    | 0.9     | 1.9     | 3.8     | 520                        | O                           | <i>Petunia</i> <sup>c</sup>      | FC:PI                |
| 1356a                     | <i>Lupinus luteolus</i> Kellogg                                                 | No      | Fabaceae <sup>j</sup> | E                         | — <sup>n</sup>         | — <sup>p</sup>   | — <sup>q</sup>               | 572                    | 0.6     | 1.2     | 2.3     | 524                        | O                           | H <sup>c</sup>                   | FC:PI                |
| 1357c                     | <i>Lupinus luteus</i> L.                                                        | No      | Fabaceae <sup>j</sup> | E                         | 52 <sup>o</sup>        | 2                | A                            | 1,193                  | 1.2     | 2.4     | 4.9     | 520                        | O                           | <i>Lupinus ang.</i> <sup>c</sup> | FC:PI                |
| 1358a                     | <i>Lupinus magnistipulatus</i> Planchuelo & Dunn                                | No      | Fabaceae <sup>j</sup> | E                         | 36 <sup>o</sup>        | — <sup>p</sup>   | P                            | 914                    | 0.9     | 1.9     | 3.7     | 524                        | O                           | <i>Petunia</i> <sup>c</sup>      | FC:PI                |
| 1359a                     | <i>Lupinus mexicanus</i> Cerv. ex Lag.                                          | No      | Fabaceae <sup>j</sup> | E                         | 48 <sup>o</sup>        | — <sup>p</sup>   | P                            | 978                    | 1.0     | 2.0     | 4.0     | 524                        | O                           | <i>Petunia</i> <sup>c</sup>      | FC:PI                |
| 1360a                     | <i>Lupinus micranthus</i> Guss.                                                 | No      | Fabaceae <sup>j</sup> | E                         | 52 <sup>o</sup>        | 2                | A                            | 479                    | 0.5     | 1.0     | 2.0     | 520                        | O                           | <i>Petunia</i> <sup>c</sup>      | FC:PI                |
| 1361a                     | <i>Lupinus microcarpus</i> Sims var. <i>densiflorus</i> (Benth.) Jeps.          | No      | Fabaceae <sup>j</sup> | E                         | — <sup>n</sup>         | — <sup>p</sup>   | A                            | 557                    | 0.6     | 1.1     | 2.3     | 524                        | O                           | <i>Petunia</i> <sup>c</sup>      | FC:PI                |
| 1362a                     | <i>Lupinus multiflorus</i> Desr.                                                | No      | Fabaceae <sup>j</sup> | E                         | 36 + 0-1B <sup>o</sup> | — <sup>p</sup>   | P                            | 910                    | 0.9     | 1.9     | 3.7     | 524                        | O                           | H <sup>c</sup>                   | FC:PI                |
| 1363a                     | <i>Lupinus mutabilis</i> Sweet                                                  | No      | Fabaceae <sup>j</sup> | E                         | 48 <sup>o</sup>        | 2                | AP                           | 929                    | 1.0     | 1.9     | 3.8     | 520                        | O                           | <i>Petunia</i> <sup>c</sup>      | FC:PI                |
| 1363b                     | <i>Lupinus mutabilis</i> Sweet                                                  | No      | Fabaceae <sup>j</sup> | E                         | 48 <sup>o</sup>        | — <sup>p</sup>   | AP                           | 929                    | 1.0     | 1.9     | 3.8     | 524                        | O                           | <i>Petunia</i> <sup>c</sup>      | FC:PI                |
| 1364a                     | <i>Lupinus nanus</i> Douglas ex Benth.                                          | No      | Fabaceae <sup>j</sup> | E                         | 48 <sup>o</sup>        | — <sup>p</sup>   | A                            | 533                    | 0.5     | 1.1     | 2.2     | 524                        | O                           | <i>Petunia</i> <sup>c</sup>      | FC:PI                |
| 1365a                     | <i>Lupinus palaestinus</i> Boiss.                                               | No      | Fabaceae <sup>j</sup> | E                         | 42 <sup>o</sup>        | 2                | A                            | 680                    | 0.7     | 1.4     | 2.8     | 520                        | O                           | <i>Petunia</i> <sup>c</sup>      | FC:PI                |
| 1366d                     | <i>Lupinus pilosus</i> Murr.                                                    | No      | Fabaceae <sup>j</sup> | E                         | 42 <sup>o</sup>        | 2                | A                            | 665                    | 0.7     | 1.4     | 2.7     | 520                        | O                           | <i>Petunia</i> <sup>c</sup>      | FC:PI                |
| 1367a                     | <i>Lupinus polyphyllus</i> C.E.Anderson                                         | No      | Fabaceae <sup>j</sup> | E                         | 48 <sup>o</sup>        | — <sup>p</sup>   | P                            | 831                    | 0.9     | 1.7     | 3.4     | 524                        | O                           | <i>Petunia</i> <sup>c</sup>      | FC:PI                |
| 1368a                     | <i>Lupinus princei</i> Harms                                                    | No      | Fabaceae <sup>j</sup> | E                         | 38 <sup>o</sup>        | 2                | A                            | 474                    | 0.5     | 1.0     | 1.9     | 520                        | O                           | <i>Petunia</i> <sup>c</sup>      | FC:PI                |
| 1369a                     | <i>Lupinus pusillus</i> Pursh                                                   | No      | Fabaceae <sup>j</sup> | E                         | 48 <sup>o</sup>        | — <sup>p</sup>   | A                            | 528                    | 0.5     | 1.1     | 2.2     | 524                        | O                           | <i>Petunia</i> <sup>c</sup>      | FC:PI                |

|       |                                                                                    |                |                       |   |                |                |   |       |     |     |      |     |   |                               |       |
|-------|------------------------------------------------------------------------------------|----------------|-----------------------|---|----------------|----------------|---|-------|-----|-----|------|-----|---|-------------------------------|-------|
| 1370a | <i>Lupinus reitzii</i> Burkart ex M.Pinheiro & Miotto <sup>i</sup>                 | No             | Fabaceae <sup>j</sup> | E | 36°            | – <sup>p</sup> | B | 934   | 1.0 | 1.9 | 3.8  | 524 | O | <i>Petunia</i> <sup>c</sup>   | FC:PI |
| 1371a | <i>Lupinus rivularis</i> Douglas ex Lindl.                                         | No             | Fabaceae <sup>j</sup> | E | – <sup>n</sup> | – <sup>p</sup> | P | 861   | 0.9 | 1.8 | 3.5  | 524 | O | <i>Petunia</i> <sup>c</sup>   | FC:PI |
| 1372a | <i>Lupinus semperflorens</i> Hartw. ex Benth.                                      | No             | Fabaceae <sup>j</sup> | E | 48°            | – <sup>p</sup> | P | 880   | 0.9 | 1.8 | 3.6  | 524 | O | <i>Petunia</i> <sup>c</sup>   | FC:PI |
| 1373a | <i>Lupinus sericeus</i> Cooper                                                     | No             | Fabaceae <sup>j</sup> | E | 48°            | – <sup>p</sup> | P | 704   | 0.7 | 1.4 | 2.9  | 524 | O | H <sup>c</sup>                | FC:PI |
| 1374a | <i>Lupinus termis</i> Forsk.                                                       | No             | Fabaceae <sup>j</sup> | E | 50°            | 2              | A | 557   | 0.6 | 1.1 | 2.3  | 520 | O | <i>Petunia</i> <sup>c</sup>   | FC:PI |
| 1375a | <i>Lupinus texensis</i> Hook.                                                      | No             | Fabaceae <sup>j</sup> | E | 36°            | – <sup>p</sup> | A | 1,193 | 1.2 | 2.4 | 4.9  | 511 | O | L                             | FC:PI |
| 1375b | <i>Lupinus texensis</i> Hook.                                                      | No             | Fabaceae <sup>j</sup> | E | 36°            | – <sup>p</sup> | A | 1,154 | 1.2 | 2.4 | 4.7  | 524 | O | G <sup>c</sup>                | FC:PI |
| 1376a | <i>Lupinus variicolor</i> Steud.                                                   | No             | Fabaceae <sup>j</sup> | E | – <sup>n</sup> | – <sup>p</sup> | P | 817   | 0.8 | 1.7 | 3.3  | 524 | O | <i>Petunia</i> <sup>c</sup>   | FC:PI |
| 1377a | <i>Lupinus vavilovi</i> Atab. & Maiss.                                             | No             | Fabaceae <sup>j</sup> | E | 50°            | 2              | A | 557   | 0.6 | 1.1 | 2.3  | 520 | O | <i>Petunia</i> <sup>c</sup>   | FC:PI |
| 1378a | <i>Luzula alpina</i> Hoppe                                                         | Yes            | Juncaceae             | M | 36             | 4 <sup>u</sup> | P | 1,007 | 1.0 | 2.1 | 4.1  | 572 | O | G <sup>c</sup>                | CIA   |
| 1379a | <i>Luzula campestris</i> (L.) DC. subsp. <i>campestris</i>                         | Yes            | Juncaceae             | M | 12             | 2 <sup>u</sup> | P | 474   | 0.5 | 1.0 | 1.9  | 572 | O | G <sup>c</sup>                | CIA   |
| 1380e | <i>Luzula canariensis</i> Poir.                                                    | – <sup>m</sup> | Juncaceae             | M | 12°            | 2 <sup>u</sup> | P | 465   | 0.5 | 1.0 | 1.9  | 552 | O | <i>Raphanus</i> <sup>c</sup>  | FC:PI |
| 1381a | <i>Luzula divulgata</i> Kirschner                                                  | Yes            | Juncaceae             | M | 24             | 4 <sup>u</sup> | P | 1,022 | 1.0 | 2.1 | 4.2  | 572 | O | G <sup>c</sup>                | CIA   |
| 1382a | <i>Luzula divulgatiformis</i> Bačić & Jogan                                        | Yes            | Juncaceae             | M | 24             | 2 <sup>u</sup> | P | 406   | 0.4 | 0.8 | 1.7  | 572 | O | G <sup>c</sup>                | CIA   |
| 1383a | <i>Luzula exspectata</i> Bačić & Jogan                                             | Yes            | Juncaceae             | M | 24             | 2 <sup>u</sup> | P | 469   | 0.5 | 1.0 | 1.9  | 572 | O | G <sup>c</sup>                | CIA   |
| 1384e | <i>Luzula luzuloides</i> (Lam.) Dandy & Wild.                                      | No             | Juncaceae             | M | – <sup>n</sup> | – <sup>u</sup> | P | 775   | 0.8 | 1.6 | 3.2  | 512 | O | <i>Trifolium</i> <sup>c</sup> | FC:PI |
| 1384f | <i>Luzula luzuloides</i> Lam. Dandy & Wilmott <sup>ax</sup>                        | No             | Juncaceae             | M | 12             | 2 <sup>u</sup> | P | 488   | 0.5 | 1.0 | 2.0  | 576 | R | – <sup>ax</sup>               | Fe    |
| 1385a | <i>Luzula multiflora</i> (Ehrh.) Lej. subsp. <i>multiflora</i>                     | Yes            | Juncaceae             | M | 24             | 4 <sup>u</sup> | P | 919   | 0.9 | 1.9 | 3.8  | 572 | O | G <sup>c</sup>                | CIA   |
| 1386a | <i>Luzula multiflora</i> (Ehrh.) Lej. subsp. <i>multiflora</i>                     | Yes            | Juncaceae             | M | 36             | 6 <sup>u</sup> | P | 1,335 | 1.4 | 2.7 | 5.5  | 572 | O | G <sup>c</sup>                | CIA   |
| 1386b | <i>Luzula multiflora</i> (Retz.) Lej.                                              | No             | Juncaceae             | M | – <sup>n</sup> | – <sup>u</sup> | P | 1,484 | 1.5 | 3.0 | 6.1  | 512 | O | <i>Trifolium</i> <sup>c</sup> | FC:PI |
| 1386c | <i>Luzula multiflora</i> (Retz.) Lej. <sup>ax</sup>                                | No             | Juncaceae             | M | 36             | 6 <sup>u</sup> | P | 958   | 1.0 | 2.0 | 3.9  | 576 | R | – <sup>ax</sup>               | Fe    |
| 1387e | <i>Luzula nivea</i> Lam. ex DC.                                                    | No             | Juncaceae             | M | – <sup>n</sup> | – <sup>u</sup> | P | 766   | 0.8 | 1.6 | 3.1  | 512 | O | <i>Trifolium</i> <sup>c</sup> | FC:PI |
| 1388a | <i>Luzula pallescens</i> Swartz <sup>ax</sup>                                      | No             | Juncaceae             | M | 12             | 2 <sup>u</sup> | P | 424   | 0.4 | 0.9 | 1.7  | 576 | R | – <sup>ax</sup>               | Fe    |
| 1389b | <i>Luzula pilosa</i> (L.) Willd. <sup>ax</sup>                                     | No             | Juncaceae             | M | 66             | – <sup>u</sup> | P | 258   | 0.3 | 0.5 | 1.1  | 576 | R | – <sup>ax</sup>               | Fe    |
| 1390a | <i>Luzula sudetica</i> (Willd.) Schult.                                            | Yes            | Juncaceae             | M | 48             | 2 <sup>u</sup> | P | 445   | 0.5 | 0.9 | 1.8  | 572 | O | G <sup>c</sup>                | CIA   |
| 1391a | <i>Lycium chilense</i> Miers ex Bertero var. <i>vergarae</i> (Phil.) Bernardello   | Yes            | Solanaceae            | E | 24             | 2              | P | 1,736 | 1.8 | 3.6 | 7.1  | 487 | O | H <sup>c</sup>                | Fe    |
| 1391b | <i>Lycium chilense</i> Miers ex Bertero var. <i>minutifolium</i> (Miers) Barkley   | Yes            | Solanaceae            | E | 24             | 2              | P | 1,800 | 1.8 | 3.7 | 7.4  | 487 | O | H <sup>c</sup>                | Fe    |
| 1392a | <i>Lycium chilense</i> Miers ex Bertero var. <i>chilense</i>                       | Yes            | Solanaceae            | E | 48             | 4              | P | 3,179 | 3.3 | 6.5 | 13.0 | 487 | O | H <sup>c</sup>                | Fe    |
| 1392b | <i>Lycium chilense</i> Miers ex Bertero var. <i>confertifolium</i> (Miers) Barkley | Yes            | Solanaceae            | E | 48             | 4              | P | 3,227 | 3.3 | 6.6 | 13.2 | 487 | O | H <sup>c</sup>                | Fe    |

| Entry number <sup>g</sup> | Species                                                                           | Voucher        | Family                    | Higher group <sup>#</sup> | 2n <sup>‡</sup> | Ploidy level (x) | Life cycle type <sup>§</sup> | DNA amount             |         |         |         | Original ref. <sup>a</sup> | Present amount <sup>†</sup> | Standard species <sup>*b1</sup> | Method <sup>††</sup> |
|---------------------------|-----------------------------------------------------------------------------------|----------------|---------------------------|---------------------------|-----------------|------------------|------------------------------|------------------------|---------|---------|---------|----------------------------|-----------------------------|---------------------------------|----------------------|
|                           |                                                                                   |                |                           |                           |                 |                  |                              | 1C (Mbp <sup>b</sup> ) | 1C (pg) | 2C (pg) | 4C (pg) |                            |                             |                                 |                      |
| 1392c                     | <i>Lycium chilense</i> Miers ex Bertero var. <i>descolei</i> Barkley              | Yes            | Solanaceae                | E                         | 48              | 4                | P                            | 3,213                  | 3·3     | 6·6     | 13·1    | 487                        | O                           | H <sup>c</sup>                  | Fe                   |
| 1393a                     | <i>Lycium elongatum</i> Miers                                                     | Yes            | Solanaceae                | E                         | 24              | 2                | P                            | 1,575                  | 1·6     | 3·2     | 6·4     | 487                        | O                           | H <sup>c</sup>                  | Fe                   |
| 1394a                     | <i>Lycium infaustum</i> Miers                                                     | Yes            | Solanaceae                | E                         | 24              | 2                | P                            | 1,878                  | 1·9     | 3·8     | 7·7     | 487                        | O                           | H <sup>c</sup>                  | Fe                   |
| 1395b                     | <i>Lycopersicon pimpinellifolium</i> (Jussl.) Mill.                               | Yes            | Solanaceae                | E                         | – <sup>n</sup>  | – <sup>p</sup>   | A                            | 1,120                  | 1·1     | 2·3     | 4·6     | 492                        | O                           | <i>Glycine</i> <sup>e</sup>     | FC:PI                |
| 1396a                     | <i>Madhuca longifolia</i> (Koenig) Macbr. var. <i>latifolia</i> (Roxb.) Chevalier | No             | Sapotaceae                | E                         | – <sup>n</sup>  | – <sup>p</sup>   | P                            | 966                    | 1·0     | 2·0     | 4·0     | 501 <sup>ag</sup>          | O                           | B <sup>c</sup>                  | Fe                   |
| 1397a                     | <i>Magnolia grandiflora</i> L.                                                    | Yes            | Magnoliaceae              | BA                        | – <sup>n</sup>  | – <sup>p</sup>   | P                            | 4,430                  | 4·5     | 9·1     | 18·1    | 489                        | O                           | – <sup>w</sup>                  | FC:EB                |
| 1398a                     | <i>Maireana decalvans</i> (Grand.) Paul G. Wilson                                 | – <sup>m</sup> | Amaranthaceae             | E                         | – <sup>n</sup>  | – <sup>p</sup>   | – <sup>q</sup>               | 1,394                  | 1·4     | 2·9     | 5·7     | 526                        | O                           | A                               | FC:PI                |
| 1399a                     | <i>Malcolmia africana</i> (L.) R.Br.                                              | Yes            | Brassicaceae <sup>j</sup> | E                         | 28              | – <sup>p</sup>   | – <sup>q</sup>               | 391                    | 0·4     | 0·8     | 1·6     | 599                        | O                           | L                               | FC:PI                |
| 1400a                     | <i>Malcolmia flexuosa</i> Sibth. & Sm.                                            | Yes            | Brassicaceae <sup>j</sup> | E                         | 16              | 2                | – <sup>q</sup>               | 254                    | 0·3     | 0·5     | 1·0     | 599                        | O                           | L                               | FC:PI                |
| 1401a                     | <i>Malcolmia nana</i> (DC.) Boiss.                                                | Yes            | Brassicaceae <sup>j</sup> | E                         | 26              | – <sup>p</sup>   | – <sup>q</sup>               | 225                    | 0·2     | 0·5     | 0·9     | 599                        | O                           | L                               | FC:PI                |
| 1402d                     | <i>Mangifera indica</i> L.                                                        | No             | Anacardiaceae             | E                         | – <sup>n</sup>  | – <sup>p</sup>   | P                            | 880                    | 0·9     | 1·8     | 3·6     | 501 <sup>ag</sup>          | O                           | B <sup>c</sup>                  | Fe                   |
| 1403a                     | <i>Marcelletia moquiniana</i> (Webb & Berthel.) Svent.                            | – <sup>m</sup> | Rosaceae                  | E                         | 28 <sup>o</sup> | 4                | P                            | 381                    | 0·4     | 0·8     | 1·6     | 552                        | O                           | <i>Raphanus</i> <sup>c</sup>    | FC:PI                |
| 1404a                     | <i>Matthiola chorassanica</i> Bunge                                               | Yes            | Brassicaceae <sup>j</sup> | E                         | 12              | 2                | – <sup>q</sup>               | 1,682                  | 1·7     | 3·4     | 6·9     | 599                        | O                           | L                               | FC:PI                |
| 1405a                     | <i>Matthiola fruticulosa</i> Maire                                                | Yes            | Brassicaceae <sup>j</sup> | E                         | 12              | 2                | – <sup>q</sup>               | 1,565                  | 1·6     | 3·2     | 6·4     | 599                        | O                           | L                               | FC:PI                |
| 1406a                     | <i>Matthiola incana</i> (L.) R.Br.                                                | Yes            | Brassicaceae <sup>j</sup> | E                         | 14              | 2                | – <sup>q</sup>               | 2,064                  | 2·1     | 4·2     | 8·4     | 599                        | O                           | L                               | FC:PI                |
| 1407a                     | <i>Matthiola maderensis</i> Lowe                                                  | Yes            | Brassicaceae <sup>j</sup> | E                         | 14              | 2                | P                            | 2,240                  | 2·3     | 4·6     | 9·2     | 599                        | O                           | L                               | FC:PI                |
| 1407b                     | <i>Matthiola maderensis</i> Lowe                                                  | – <sup>m</sup> | Brassicaceae <sup>j</sup> | E                         | 14 <sup>o</sup> | 2                | P                            | 2,357                  | 2·4     | 4·8     | 9·6     | 552                        | O                           | H <sup>c</sup>                  | FC:PI                |
| 1408a                     | <i>Matthiola sinuata</i> R.Br.                                                    | Yes            | Brassicaceae <sup>j</sup> | E                         | 14              | 2                | – <sup>q</sup>               | 2,201                  | 2·3     | 4·5     | 9·0     | 599                        | O                           | L                               | FC:PI                |
| 1409a                     | <i>Mausolea eriocarpa</i> (Bunge) Poljakov                                        | Yes            | Asteraceae <sup>j</sup>   | E                         | 36 <sup>o</sup> | 2                | P                            | 6,743                  | 6·9     | 13·8    | 27·6    | 521                        | O                           | G <sup>c</sup>                  | FC:PI                |
| 1410a                     | <i>Medicago sativa</i> L. subsp. <i>quasifalcata</i>                              | No             | Fabaceae <sup>j</sup>     | E                         | 16 <sup>o</sup> | 2                | P                            | 841                    | 0·9     | 1·7     | 3·4     | 611                        | O                           | <i>Petunia</i> <sup>c</sup>     | FC:EB                |
| 1410b                     | <i>Medicago sativa</i> L. subsp. <i>caerulea</i>                                  | No             | Fabaceae <sup>j</sup>     | E                         | 16 <sup>o</sup> | 2                | P                            | 880                    | 0·9     | 1·8     | 3·6     | 611                        | O                           | <i>Petunia</i> <sup>c</sup>     | FC:EB                |
| 1411d                     | <i>Medicago sativa</i> L. subsp. <i>sativa</i> cv. Europe <sup>h</sup>            | No             | Fabaceae <sup>j</sup>     | E                         | 32 <sup>o</sup> | 4                | P                            | 1,628                  | 1·7     | 3·3     | 6·7     | 611                        | O                           | <i>Petunia</i> <sup>c</sup>     | FC:EB                |
| 1411e                     | <i>Medicago sativa</i> L. subsp. <i>sativa</i> cv. Nagyszenas <sup>h</sup>        | No             | Fabaceae <sup>j</sup>     | E                         | 32 <sup>o</sup> | 4                | P                            | 1,692                  | 1·7     | 3·5     | 6·9     | 611                        | O                           | <i>Petunia</i> <sup>c</sup>     | FC:EB                |

|       |                                                                             |                |                        |   |                    |                  |   |                |                |      |      |                   |   |                              |       |
|-------|-----------------------------------------------------------------------------|----------------|------------------------|---|--------------------|------------------|---|----------------|----------------|------|------|-------------------|---|------------------------------|-------|
| 1412d | <i>Medicago truncatula</i><br>Gaertn. ecotype 108-1 <sup>h</sup>            | No             | Fabaceae <sup>j</sup>  | E | 16 <sup>o</sup>    | 2                | A | 479            | 0.5            | 1.0  | 2.0  | 611               | O | <i>Petunia</i> <sup>c</sup>  | FC:EB |
| 1412e | <i>Medicago truncatula</i><br>Gaertn. cv. Jemalong <sup>h</sup>             | No             | Fabaceae <sup>j</sup>  | E | 16 <sup>o</sup>    | 2                | A | 562            | 0.6            | 1.2  | 2.3  | 611               | O | <i>Petunia</i> <sup>c</sup>  | FC:EB |
| 1413a | <i>Medusagyne oppositifolia</i><br>Baker                                    | No             | Ochnaceae              | E | – <sup>n</sup>     | – <sup>p</sup>   | P | 325            | 0.3            | 0.7  | 1.3  | 612               | O | <i>Solan.</i> <sup>c</sup>   | FC:PI |
| 1414a | <i>Melaleuca quinquenervia</i><br>(Cav.) S.T.Blake                          | – <sup>m</sup> | Myrtaceae              | E | – <sup>n</sup>     | – <sup>p</sup>   | P | 949            | 1.0            | 1.9  | 3.9  | 526               | O | A                            | FC:PI |
| 1415a | <i>Mercurialis annua</i> L. <sup>i</sup>                                    | No             | Euphorbiaceae          | E | 16                 | 2                | A | 648            | 0.7            | 1.3  | 2.7  | 544               | O | <i>Solan.</i> <sup>c</sup>   | FC:PI |
| 1416a | <i>Mercurialis annua</i> L. <sup>i</sup>                                    | No             | Euphorbiaceae          | E | 32                 | 4                | A | 1,269          | 1.3            | 2.6  | 5.2  | 544               | O | <i>Solan.</i> <sup>c</sup>   | FC:PI |
| 1417a | <i>Mercurialis annua</i> L. <sup>i</sup>                                    | No             | Euphorbiaceae          | E | 56                 | 6                | A | 1,907          | 2.0            | 3.9  | 7.8  | 544               | O | <i>Solan.</i> <sup>c</sup>   | FC:PI |
| 1418a | <i>Mercurialis canariensis</i><br>D.J.Obbard &<br>S.A.Harris <sup>i</sup>   | No             | Euphorbiaceae          | E | 32                 | 4                | A | 1,579          | 1.6            | 3.2  | 6.5  | 544               | O | <i>Solan.</i> <sup>c</sup>   | FC:PI |
| 1419a | <i>Mercurialis huetii</i><br>Hanry. <sup>i</sup>                            | No             | Euphorbiaceae          | E | 16                 | 2                | A | 699            | 0.7            | 1.4  | 2.9  | 544               | O | <i>Solan.</i> <sup>c</sup>   | FC:PI |
| 1420a | <i>Mespilus canescens</i><br>J.B.Phipps <sup>i</sup>                        | Yes            | Rosaceae               | E | – <sup>n</sup>     | 3 <sup>z</sup>   | P | – <sup>t</sup> | – <sup>t</sup> | 2.3  | 4.6  | 527               | O | G <sup>c</sup>               | FC:PI |
| 1421b | <i>Mespilus germanica</i> L.                                                | Yes            | Rosaceae               | E | – <sup>n</sup>     | – <sup>p</sup>   | P | 753            | 0.8            | 1.5  | 3.1  | 489               | O | – <sup>w</sup>               | FC:EB |
| 1421c | <i>Mespilus germanica</i> L. <sup>i</sup>                                   | Yes            | Rosaceae               | E | – <sup>n</sup>     | 2 <sup>z</sup>   | P | 680            | 0.7            | 1.4  | 2.8  | 527               | O | G <sup>c</sup>               | FC:PI |
| 1421d | <i>Mespilus germanica</i> L. <sup>i</sup>                                   | Yes            | Rosaceae               | E | – <sup>n</sup>     | 2–3 <sup>z</sup> | P | 846            | 0.9            | 1.7  | 3.5  | 527               | O | G <sup>c</sup>               | FC:PI |
| 1422a | <i>Microlaena avenacea</i><br>(Raoul) Hook.f.                               | Yes            | Poaceae <sup>j</sup>   | M | 48 <sup>o</sup>    | 4                | P | 1,663          | 1.7            | 3.4  | 6.8  | 528               | O | – <sup>w</sup>               | FC:PI |
| 1423a | <i>Microlaena carsei</i><br>Cheeseman                                       | Yes            | Poaceae <sup>j</sup>   | M | 48 <sup>o</sup>    | 4                | P | 1,589          | 1.6            | 3.3  | 6.5  | 528               | O | – <sup>w</sup>               | FC:PI |
| 1424a | <i>Microlaena polynoda</i><br>(Hook.f.) Hook.f.                             | Yes            | Poaceae <sup>j</sup>   | M | 48 <sup>o</sup>    | 4                | P | 1,159          | 1.2            | 2.4  | 4.7  | 528               | O | – <sup>w</sup>               | FC:PI |
| 1425a | <i>Microlaena stipoides</i><br>(Labill.) R.Br. <sup>i</sup>                 | Yes            | Poaceae <sup>j</sup>   | M | 48                 | 4                | P | 895            | 0.9            | 1.8  | 3.7  | 528               | O | – <sup>w</sup>               | FC:PI |
| 1426a | <i>Micromeria glomerata</i><br>Pérez                                        | – <sup>m</sup> | Lamiaceae <sup>j</sup> | E | – <sup>n</sup>     | – <sup>p</sup>   | P | 430            | 0.4            | 0.9  | 1.8  | 477               | O | <i>Raphanus</i> <sup>c</sup> | FC:PI |
| 1427a | <i>Micromeria</i><br><i>herpyllomorpha</i> Webb<br>& Berth.                 | – <sup>m</sup> | Lamiaceae <sup>j</sup> | E | – <sup>n</sup>     | ≥2               | P | 372            | 0.4            | 0.8  | 1.5  | 477               | O | <i>Raphanus</i> <sup>c</sup> | FC:PI |
| 1428a | <i>Micromeria hyssopifolia</i><br>Webb & Berth. var.<br><i>hyssopifolia</i> | – <sup>m</sup> | Lamiaceae <sup>j</sup> | E | – <sup>n</sup>     | ≥2               | P | 352            | 0.4            | 0.7  | 1.4  | 477               | O | <i>Raphanus</i> <sup>c</sup> | FC:PI |
| 1429a | <i>Micromeria lachnophylla</i><br>Webb & Berth.                             | – <sup>m</sup> | Lamiaceae <sup>j</sup> | E | 30                 | ≥2               | P | 362            | 0.4            | 0.7  | 1.5  | 477               | O | <i>Raphanus</i> <sup>c</sup> | FC:PI |
| 1430a | <i>Micromeria varia</i><br>Benth. subsp. <i>varia</i>                       | – <sup>m</sup> | Lamiaceae <sup>j</sup> | E | 30 <sup>o</sup>    | ≥2               | P | 367            | 0.4            | 0.8  | 1.5  | 477               | O | <i>Raphanus</i> <sup>c</sup> | FC:PI |
| 1431a | <i>Millettia tetraptera</i> Kurz                                            | No             | Fabaceae <sup>j</sup>  | E | – <sup>n</sup>     | – <sup>p</sup>   | P | 1,731          | 1.8            | 3.5  | 7.1  | 501 <sup>ag</sup> | O | B <sup>c</sup>               | Fe    |
| 1432a | <i>Miltonia phymatochila</i><br>(Lindl.) N.H.Williams<br>& M.W.Chase        | Yes            | Orchidaceae            | M | – <sup>n</sup>     | – <sup>p</sup>   | P | 5,604          | 5.7            | 11.5 | 22.9 | 504 <sup>ah</sup> | O | F                            | Fe    |
| 1433a | <i>Mitragyna parviflora</i><br>(Roxb.) Korth.                               | No             | Rubiaceae              | E | 44 <sup>o</sup>    | 4                | P | 949            | 1.0            | 1.9  | 3.9  | 501 <sup>ag</sup> | O | B <sup>c</sup>               | Fe    |
| 1434a | <i>Mitriostigma axillaris</i><br>Hochst.                                    | No             | Rubiaceae              | E | 22 <sup>o</sup>    | 2                | P | 890            | 0.9            | 1.8  | 3.6  | 501 <sup>ag</sup> | O | B <sup>c</sup>               | Fe    |
| 1435b | <i>Momordica charantia</i> L.                                               | Yes            | Cucurbitaceae          | E | – <sup>n</sup>     | – <sup>p</sup>   | P | 699            | 0.7            | 1.4  | 2.9  | 492               | O | <i>Raphanus</i> <sup>c</sup> | FC:PI |
| 1436a | <i>Monanthes anagensis</i><br>Praeger                                       | – <sup>m</sup> | Crassulaceae           | E | c. 72 <sup>o</sup> | 8                | P | 880            | 0.9            | 1.8  | 3.6  | 552               | O | <i>Solan.</i> <sup>c</sup>   | FC:PI |
| 1437a | <i>Monanthes brachycaulos</i><br>(Webb in Webb &<br>Berthel.) Lowe          | – <sup>m</sup> | Crassulaceae           | E | 36 <sup>o</sup>    | 4                | P | 719            | 0.7            | 1.5  | 2.9  | 552               | O | <i>Solan.</i> <sup>c</sup>   | FC:PI |

| Entry number <sup>e</sup> | Species                                                                                         | Voucher        | Family                    | Higher group <sup>f</sup> | 2n <sup>g</sup> | Ploidy level (x) | Life cycle type <sup>h</sup> | DNA amount             |         |         |         | Original ref. <sup>a</sup> | Present amount <sup>†</sup> | Standard species <sup>*b1</sup> | Method <sup>††</sup> |
|---------------------------|-------------------------------------------------------------------------------------------------|----------------|---------------------------|---------------------------|-----------------|------------------|------------------------------|------------------------|---------|---------|---------|----------------------------|-----------------------------|---------------------------------|----------------------|
|                           |                                                                                                 |                |                           |                           |                 |                  |                              | 1C (Mbp <sup>s</sup> ) | 1C (pg) | 2C (pg) | 4C (pg) |                            |                             |                                 |                      |
| 1438a                     | <i>Monanthes laxiflora</i> (DC.) Bolle                                                          | – <sup>m</sup> | Crassulaceae              | E                         | 36 <sup>o</sup> | 4                | P                            | 655                    | 0.7     | 1.3     | 2.7     | 552                        | O                           | <i>Solan.</i> <sup>c</sup>      | FC:PI                |
| 1439a                     | <i>Monanthes muralis</i> (Webb ex Bolle) Hook.f.                                                | – <sup>m</sup> | Crassulaceae              | E                         | 36 <sup>o</sup> | 4                | P                            | 499                    | 0.5     | 1.0     | 2.0     | 552                        | O                           | <i>Solan.</i> <sup>c</sup>      | FC:PI                |
| 1440a                     | <i>Monanthes polyphylla</i> Haw. subsp. <i>polyphylla</i>                                       | – <sup>m</sup> | Crassulaceae              | E                         | 36 <sup>o</sup> | 4                | P                            | 636                    | 0.7     | 1.3     | 2.6     | 552                        | O                           | <i>Solan.</i> <sup>c</sup>      | FC:PI                |
| 1441a                     | <i>Moricandia arvensis</i> (L.) DC.                                                             | Yes            | Brassicaceae <sup>j</sup> | E                         | 28              | – <sup>p</sup>   | – <sup>q</sup>               | 636                    | 0.7     | 1.3     | 2.6     | 599                        | O                           | L                               | FC:PI                |
| 1442a                     | <i>Morinda pubescens</i> S.M.                                                                   | No             | Rubiaceae                 | E                         | – <sup>n</sup>  | – <sup>p</sup>   | P                            | 601                    | 0.6     | 1.2     | 2.5     | 501 <sup>ag</sup>          | O                           | B <sup>c</sup>                  | Fe                   |
| 1443a                     | <i>Morisia monanthos</i> (Viv.) Asch.                                                           | No             | Brassicaceae <sup>j</sup> | E                         | 14              | 2                | P                            | 772                    | 0.8     | 1.6     | 3.2     | 602                        | O                           | <i>Solan.</i> <sup>c</sup>      | FC:PI                |
| 1444b                     | <i>Morus alba</i> L.                                                                            | Yes            | Moraceae                  | E                         | – <sup>n</sup>  | – <sup>p</sup>   | P                            | 386                    | 0.4     | 0.8     | 1.6     | 489                        | O                           | – <sup>w</sup>                  | FC:EB                |
| 1445l                     | <i>Musa acuminata</i> Colla subsp. <i>banksii</i> N.W.Simmonds                                  | No             | Musaceae                  | M                         | 22              | 2                | P                            | 618                    | 0.6     | 1.3     | 2.5     | 503                        | O                           | <i>Glycine</i> <sup>e</sup>     | FC:PI                |
| 1446f                     | <i>Musa balbisiana</i> Colla type Cameroun                                                      | No             | Musaceae                  | M                         | 22              | 2                | P                            | 553                    | 0.6     | 1.1     | 2.3     | 503                        | O                           | <i>Glycine</i> <sup>e</sup>     | FC:PI                |
| 1447a                     | <i>Musa beccarii</i> N.W.Simmonds                                                               | No             | Musaceae                  | M                         | 18              | 2                | P                            | 763                    | 0.8     | 1.6     | 3.1     | 503                        | O                           | <i>Glycine</i> <sup>e</sup>     | FC:PI                |
| 1448a                     | <i>Musa laterita</i> Cheesman                                                                   | No             | Musaceae                  | M                         | 22              | 2                | P                            | 597                    | 0.6     | 1.2     | 2.4     | 503                        | O                           | <i>Glycine</i> <sup>e</sup>     | FC:PI                |
| 1449a                     | <i>Musa maclayi</i> F.Muell. type Hung Si                                                       | No             | Musaceae                  | M                         | 20              | 2                | P                            | 722                    | 0.7     | 1.5     | 3.0     | 503                        | O                           | <i>Glycine</i> <sup>e</sup>     | FC:PI                |
| 1450a                     | <i>Musa mannii</i> H.Wendl. ex Baker                                                            | No             | Musaceae                  | M                         | 22              | 2                | P                            | 621                    | 0.6     | 1.3     | 2.5     | 503                        | O                           | <i>Glycine</i> <sup>e</sup>     | FC:PI                |
| 1451b                     | <i>Musa ornata</i> Roxb.                                                                        | No             | Musaceae                  | M                         | 22              | 2                | P                            | 635                    | 0.6     | 1.3     | 2.6     | 503                        | O                           | <i>Glycine</i> <sup>e</sup>     | FC:PI                |
| 1452a                     | <i>Musa peekelii</i> Lauterb. subsp. <i>peekelii</i> (N.W.Simmonds) Argent                      | No             | Musaceae                  | M                         | 20              | 2                | P                            | 756                    | 0.8     | 1.5     | 3.1     | 503                        | O                           | <i>Glycine</i> <sup>e</sup>     | FC:PI                |
| 1453b                     | <i>Musa schizocarpa</i> N.W.Simmonds                                                            | No             | Musaceae                  | M                         | 22              | 2                | P                            | 673                    | 0.7     | 1.4     | 2.8     | 503                        | O                           | <i>Glycine</i> <sup>e</sup>     | FC:PI                |
| 1454b                     | <i>Musa textilis</i> Née                                                                        | No             | Musaceae                  | M                         | 20              | 2                | P                            | 702                    | 0.7     | 1.4     | 2.9     | 503                        | O                           | <i>Glycine</i> <sup>e</sup>     | FC:PI                |
| 1455a                     | <i>Musa velutina</i> Wendl. & Drude                                                             | No             | Musaceae                  | M                         | 22 <sup>o</sup> | 2                | P                            | 607                    | 0.6     | 1.2     | 2.5     | 503                        | O                           | <i>Glycine</i> <sup>e</sup>     | FC:PI                |
| 1456a                     | <i>Musschia aurea</i> (L.f.) DC.                                                                | – <sup>m</sup> | Campanulaceae             | E                         | 32 <sup>o</sup> | 4                | P                            | 494                    | 0.5     | 1.0     | 2.0     | 552                        | O                           | <i>Solan.</i> <sup>c</sup>      | FC:PI                |
| 1457a                     | <i>Myagrurn perfoliatum</i> L.                                                                  | Yes            | Brassicaceae <sup>j</sup> | E                         | 14              | 2                | – <sup>q</sup>               | 284                    | 0.3     | 0.6     | 1.2     | 599                        | O                           | L                               | FC:PI                |
| 1458a                     | <i>Mycelis muralis</i> (L.) Dum.                                                                | No             | Asteraceae <sup>j</sup>   | E                         | 18              | 2                | – <sup>q</sup>               | 1,956                  | 2.0     | 4.0     | 8.0     | 608                        | O                           | <i>Lactuca</i> <sup>e</sup>     | FC:DAPI              |
| 1459a                     | <i>Myzorrhiza californica</i> (Cham. & Schlecht.) Rydb. subsp. <i>californica</i> <sup>an</sup> | Yes            | Orobanchaceae             | E                         | 48              | 4                | P                            | 2,109                  | 2.2     | 4.3     | 8.6     | 531 <sup>an</sup>          | O                           | G <sup>c</sup>                  | CIA                  |
| 1459b                     | <i>Myzorrhiza californica</i> (Cham. & Schlecht.) Rydb. subsp. <i>grandis</i> <sup>an</sup>     | Yes            | Orobanchaceae             | E                         | 48              | 4                | P                            | 2,473                  | 2.5     | 5.1     | 10.1    | 531 <sup>an</sup>          | O                           | G <sup>c</sup>                  | CIA                  |
| 1460a                     | <i>Myzorrhiza pinorum</i> (A.Gray) Rydb. <sup>an</sup>                                          | Yes            | Orobanchaceae             | E                         | 48              | 4                | P                            | 2,269                  | 2.3     | 4.6     | 9.3     | 531 <sup>an</sup>          | O                           | G <sup>c</sup>                  | CIA                  |



|       |                                                                        |    |                |   |                 |                |                |        |      |      |       |     |   |                               |       |
|-------|------------------------------------------------------------------------|----|----------------|---|-----------------|----------------|----------------|--------|------|------|-------|-----|---|-------------------------------|-------|
| 1461a | <i>Narcissus abscissus</i> (Haw.) Schult.f.                            | No | Amaryllidaceae | M | 14°             | 2              | P              | 12,910 | 13.2 | 26.4 | 52.8  | 581 | O | <i>Agave</i> sp. <sup>e</sup> | FC:PI |
| 1462a | <i>Narcissus assoanus</i> Dufour                                       | No | Amaryllidaceae | M | 14°             | 2              | P              | 9,193  | 9.4  | 18.8 | 37.6  | 581 | O | <i>Agave</i> sp. <sup>e</sup> | FC:PI |
| 1463a | <i>Narcissus asturiensis</i> (Jord.) Pugsley                           | No | Amaryllidaceae | M | 14°             | 2              | P              | 11,834 | 12.1 | 24.2 | 48.4  | 581 | O | <i>Agave</i> sp. <sup>e</sup> | FC:PI |
| 1464a | <i>Narcissus blanchardii</i> Zonn.                                     | No | Amaryllidaceae | M | 28 <sup>z</sup> | 4 <sup>z</sup> | P              | 25,037 | 25.6 | 51.2 | 102.4 | 581 | O | <i>Agave</i> sp. <sup>e</sup> | FC:PI |
| 1465a | <i>Narcissus broussonetii</i> Lag.                                     | No | Amaryllidaceae | M | 22°             | 2              | P              | 18,289 | 18.7 | 37.4 | 74.8  | 581 | O | <i>Agave</i> sp. <sup>e</sup> | FC:PI |
| 1466a | <i>Narcissus bujei</i> Fern.Casas                                      | No | Amaryllidaceae | M | 14 <sup>z</sup> | 2 <sup>z</sup> | P              | 14,670 | 15.0 | 30.0 | 60.0  | 581 | O | <i>Agave</i> sp. <sup>e</sup> | FC:PI |
| 1467a | <i>Narcissus bulbocodium</i> L.                                        | No | Amaryllidaceae | M | 14°             | 2              | P              | 6,944  | 7.1  | 14.2 | 28.4  | 581 | O | <i>Agave</i> sp. <sup>e</sup> | FC:PI |
| 1468a | <i>Narcissus calcicola</i> Mendonca                                    | No | Amaryllidaceae | M | 14°             | 2              | P              | 13,007 | 13.3 | 26.6 | 53.2  | 581 | O | <i>Agave</i> sp. <sup>e</sup> | FC:PI |
| 1469c | <i>Narcissus cantabricus</i> DC.                                       | No | Amaryllidaceae | M | 14°             | 2              | P              | 7,091  | 7.3  | 14.5 | 29.0  | 581 | O | <i>Agave</i> sp. <sup>e</sup> | FC:PI |
| 1470a | <i>Narcissus cavanillesii</i> Barra & G.Lopez                          | No | Amaryllidaceae | M | 28°             | 4              | – <sup>q</sup> | 16,284 | 16.7 | 33.3 | 66.6  | 581 | O | <i>Agave</i> sp. <sup>e</sup> | FC:PI |
| 1471a | <i>Narcissus cuatrecasasii</i> Fern. Casas, Lainz & Ruiz Rejon         | No | Amaryllidaceae | M | 14°             | 2              | P              | 15,501 | 15.9 | 31.7 | 63.4  | 581 | O | <i>Agave</i> sp. <sup>e</sup> | FC:PI |
| 1472a | <i>Narcissus cyclamineus</i> DC.                                       | No | Amaryllidaceae | M | 14°             | 2              | P              | 12,714 | 13.0 | 26.0 | 52.0  | 581 | O | <i>Agave</i> sp. <sup>e</sup> | FC:PI |
| 1473a | <i>Narcissus dubius</i> Gouan                                          | No | Amaryllidaceae | M | 50°             | 6              | P              | 32,421 | 33.2 | 66.3 | 132.6 | 581 | O | <i>Agave</i> sp. <sup>e</sup> | FC:PI |
| 1474a | <i>Narcissus elegans</i> (Haw.) Spach                                  | No | Amaryllidaceae | M | 20°             | 2              | P              | 14,768 | 15.1 | 30.2 | 60.4  | 581 | O | <i>Agave</i> sp. <sup>e</sup> | FC:PI |
| 1475a | <i>Narcissus gaditanus</i> Boiss. & Reuter                             | No | Amaryllidaceae | M | 14°             | 2              | P              | 9,438  | 9.7  | 19.3 | 38.6  | 581 | O | <i>Agave</i> sp. <sup>e</sup> | FC:PI |
| 1476c | <i>Narcissus hedraeanthus</i> (Webb & Heldr.) Colmeiro                 | No | Amaryllidaceae | M | 14°             | 2              | P              | 7,335  | 7.5  | 15.0 | 30.0  | 581 | O | <i>Agave</i> sp. <sup>e</sup> | FC:PI |
| 1477a | <i>Narcissus jacetanus</i> Fern. Casas                                 | No | Amaryllidaceae | M | 14°             | 2              | P              | 10,905 | 11.2 | 22.3 | 44.6  | 581 | O | <i>Agave</i> sp. <sup>e</sup> | FC:PI |
| 1478a | <i>Narcissus jonquilla</i> L.                                          | No | Amaryllidaceae | M | 14°             | 2              | P              | 16,039 | 16.4 | 32.8 | 65.6  | 581 | O | <i>Agave</i> sp. <sup>e</sup> | FC:PI |
| 1478b | <i>Narcissus jonquilla</i> L. subsp. <i>wilkommii</i> (A. Fern.) Zonn. | No | Amaryllidaceae | M | 14°             | 2              | P              | 16,235 | 16.6 | 33.2 | 66.4  | 581 | O | <i>Agave</i> sp. <sup>e</sup> | FC:PI |
| 1479a | <i>Narcissus longispathus</i> Pugsley                                  | No | Amaryllidaceae | M | 14°             | 2              | P              | 17,604 | 18.0 | 36.0 | 72.0  | 581 | O | <i>Agave</i> sp. <sup>e</sup> | FC:PI |
| 1480a | <i>Narcissus lusitanicus</i> Dorda & Fern. Casas                       | No | Amaryllidaceae | M | 14°             | 2              | P              | 8,264  | 8.5  | 16.9 | 33.8  | 581 | O | <i>Agave</i> sp. <sup>e</sup> | FC:PI |
| 1481a | <i>Narcissus miniatus</i> Koop., Donnison-Morgan & Zonn.               | No | Amaryllidaceae | M | 30°             | 6              | P              | 25,086 | 25.7 | 51.3 | 102.6 | 581 | O | <i>Agave</i> sp. <sup>e</sup> | FC:PI |
| 1482a | <i>Narcissus moleroi</i> Fern. & Casas                                 | No | Amaryllidaceae | M | 14°             | 2              | P              | 12,763 | 13.1 | 26.1 | 52.2  | 581 | O | <i>Agave</i> sp. <sup>e</sup> | FC:PI |
| 1483a | <i>Narcissus nevadensis</i> Pugsley                                    | No | Amaryllidaceae | M | 14°             | 2              | P              | 18,680 | 19.1 | 38.2 | 76.4  | 581 | O | <i>Agave</i> sp. <sup>e</sup> | FC:PI |
| 1484a | <i>Narcissus obesus</i> Salisbury                                      | No | Amaryllidaceae | M | 26°             | 2              | P              | 12,959 | 13.3 | 26.5 | 53.0  | 581 | O | <i>Agave</i> sp. <sup>e</sup> | FC:PI |
| 1485a | <i>Narcissus pallidulus</i> Graells                                    | No | Amaryllidaceae | M | 14°             | 2              | P              | 8,802  | 9.0  | 18.0 | 36.0  | 581 | O | <i>Agave</i> sp. <sup>e</sup> | FC:PI |

Continued

| Entry number <sup>e</sup> | Species                                                                       | Voucher        | Family                    | Higher group <sup>f</sup> | 2n <sup>‡</sup> | Ploidy level (x) | Life cycle type <sup>g</sup> | DNA amount             |         |         |         | Original ref. <sup>a</sup> | Present amount <sup>†</sup> | Standard species <sup>*b1</sup> | Method <sup>††</sup> |
|---------------------------|-------------------------------------------------------------------------------|----------------|---------------------------|---------------------------|-----------------|------------------|------------------------------|------------------------|---------|---------|---------|----------------------------|-----------------------------|---------------------------------|----------------------|
|                           |                                                                               |                |                           |                           |                 |                  |                              | 1C (Mbp <sup>s</sup> ) | 1C (pg) | 2C (pg) | 4C (pg) |                            |                             |                                 |                      |
| 1486a                     | <i>Narcissus papyraceus</i> Ker Gawl.                                         | No             | Amaryllidaceae            | M                         | 22°             | 2                | P                            | 16,479                 | 16.9    | 33.7    | 67.4    | 581                        | O                           | <i>Agave</i> sp. <sup>e</sup>   | FC:PI                |
| 1487b                     | <i>Narcissus poeticus</i> L.                                                  | No             | Amaryllidaceae            | M                         | 14°             | 2                | P                            | 12,714                 | 13.0    | 26.0    | 52.0    | 581                        | O                           | <i>Agave</i> sp. <sup>e</sup>   | FC:PI                |
| 1488a                     | <i>Narcissus primigenius</i> Fern. Casas & Lainz                              | No             | Amaryllidaceae            | M                         | 14°             | 2                | P                            | 10,611                 | 10.9    | 21.7    | 43.4    | 581                        | O                           | <i>Agave</i> sp. <sup>e</sup>   | FC:PI                |
| 1489a                     | <i>Narcissus pseudonarcissus</i> L.                                           | No             | Amaryllidaceae            | M                         | 14°             | 2                | P                            | 11,492                 | 11.8    | 23.5    | 47.0    | 581                        | O                           | <i>Agave</i> sp. <sup>e</sup>   | FC:PI                |
| 1489b                     | <i>Narcissus pseudonarcissus</i> L. subsp. <i>minor</i> (L.) Baker            | No             | Amaryllidaceae            | M                         | 14°             | 2                | P                            | 11,540                 | 11.8    | 23.6    | 47.2    | 581                        | O                           | <i>Agave</i> sp. <sup>e</sup>   | FC:PI                |
| 1490a                     | <i>Narcissus pseudonarcissus</i> L. subsp. <i>bicolor</i> (L.) Willk. & Lange | No             | Amaryllidaceae            | M                         | 42°             | 6                | P                            | 33,105                 | 33.9    | 67.7    | 135.4   | 581                        | O                           | <i>Agave</i> sp. <sup>e</sup>   | FC:PI                |
| 1491a                     | <i>Narcissus romieuxii</i> Braun-Blanq. & Maire                               | No             | Amaryllidaceae            | M                         | 28°             | 4                | P                            | 14,083                 | 14.4    | 28.8    | 57.6    | 581                        | O                           | <i>Agave</i> sp. <sup>e</sup>   | FC:PI                |
| 1492a                     | <i>Narcissus rupicola</i> Dufour                                              | No             | Amaryllidaceae            | M                         | 14°             | 2                | P                            | 13,007                 | 13.3    | 26.6    | 53.2    | 581                        | O                           | <i>Agave</i> sp. <sup>e</sup>   | FC:PI                |
| 1493a                     | <i>Narcissus scaberulus</i> Henriq.                                           | No             | Amaryllidaceae            | M                         | 14°             | 2                | P                            | 12,861                 | 13.2    | 26.3    | 52.6    | 581                        | O                           | <i>Agave</i> sp. <sup>e</sup>   | FC:PI                |
| 1494a                     | <i>Narcissus serotinus</i> L.                                                 | No             | Amaryllidaceae            | M                         | 10°             | 2                | P                            | 10,171                 | 10.4    | 20.8    | 41.6    | 581                        | O                           | <i>Agave</i> sp. <sup>e</sup>   | FC:PI                |
| 1495a                     | <i>Narcissus tazetta</i> L.                                                   | No             | Amaryllidaceae            | M                         | 20°             | 2                | P                            | 14,817                 | 15.2    | 30.3    | 60.6    | 581                        | O                           | <i>Agave</i> sp. <sup>e</sup>   | FC:PI                |
| 1496a                     | <i>Narcissus triandrus</i> L.                                                 | No             | Amaryllidaceae            | M                         | 14°             | 2                | P                            | 9,291                  | 9.5     | 19.0    | 38.0    | 581                        | O                           | <i>Agave</i> sp. <sup>e</sup>   | FC:PI                |
| 1497a                     | <i>Narcissus viridiflorus</i> Schousboe                                       | No             | Amaryllidaceae            | M                         | 28°             | 4                | P                            | 31,052                 | 31.8    | 63.5    | 127.0   | 581                        | O                           | <i>Agave</i> sp. <sup>e</sup>   | FC:PI                |
| 1498a                     | <i>Nauplius intermedius</i> Webb                                              | – <sup>m</sup> | Asteraceae <sup>j</sup>   | E                         | 14°             | 2                | P                            | 841                    | 0.9     | 1.7     | 3.4     | 552                        | O                           | <i>Glycine</i> <sup>e</sup>     | FC:PI                |
| 1499a                     | <i>Nauplius sericeus</i> (L.f.) Cass.                                         | – <sup>m</sup> | Asteraceae <sup>j</sup>   | E                         | 14              | 2                | P                            | 841                    | 0.9     | 1.7     | 3.4     | 477                        | O                           | <i>Glycine</i> <sup>e</sup>     | FC:PI                |
| 1500a                     | <i>Navia splendens</i> L.B.Sm.                                                | Yes            | Bromeliaceae              | M                         | – <sup>n</sup>  | – <sup>p</sup>   | P                            | 694                    | 0.7     | 1.4     | 2.8     | 575                        | O                           | <i>Raphanus</i> <sup>e</sup>    | FC:PI                |
| 1501a                     | <i>Neochamaelea pulverulenta</i> (Vent.) Erdtman                              | – <sup>m</sup> | Rutaceae                  | E                         | 36°             | 4                | P                            | 729                    | 0.7     | 1.5     | 3.0     | 552                        | O                           | <i>Solan.</i> <sup>c</sup>      | FC:PI                |
| 1502a                     | <i>Neopallasia pectinata</i> (Pall.) Poljakov                                 | Yes            | Asteraceae <sup>j</sup>   | E                         | 36              | 2                | A                            | 5,164                  | 5.3     | 10.6    | 21.1    | 521                        | O                           | G <sup>c</sup>                  | FC:PI                |
| 1503a                     | <i>Neotorularia humilis</i> (C.A.Mey.) Hedge & J. Léonard                     | Yes            | Brassicaceae <sup>j</sup> | E                         | 28, 42, 56°     | – <sup>p</sup>   | – <sup>q</sup>               | 1,027                  | 1.1     | 2.1     | 4.2     | 599                        | O                           | L                               | FC:PI                |
| 1504a                     | <i>Nepeta teydea</i> Webb & Berth.                                            | – <sup>m</sup> | Lamiaceae <sup>j</sup>    | E                         | 16°             | 2                | P                            | 269                    | 0.3     | 0.6     | 1.1     | 477                        | O                           | <i>Raphanus</i> <sup>e</sup>    | FC:PI                |
| 1505a                     | <i>Nerine angustifolia</i> Baker <sup>h</sup>                                 | Yes            | Amaryllidaceae            | M                         | 22°             | 2 <sup>z</sup>   | P                            | 11,492                 | 11.8    | 23.5    | 47.0    | 532 <sup>ao</sup>          | O                           | <i>Agave</i> sp. <sup>e</sup>   | FC:PI                |
| 1506a                     | <i>Nerine appendiculata</i> Baker <sup>h</sup>                                | Yes            | Amaryllidaceae            | M                         | 22°             | 2 <sup>z</sup>   | P                            | 11,149                 | 11.4    | 22.8    | 45.6    | 532 <sup>ao</sup>          | O                           | <i>Agave</i> sp. <sup>e</sup>   | FC:PI                |
| 1507a                     | <i>Nerine bowdenii</i> W.Watson <sup>h</sup>                                  | Yes            | Amaryllidaceae            | M                         | 22°             | 2 <sup>z</sup>   | P                            | 17,262                 | 17.7    | 35.3    | 70.6    | 532 <sup>ao</sup>          | O                           | <i>Agave</i> sp. <sup>e</sup>   | FC:PI                |
| 1508a                     | <i>Nerine duparquetiana</i> Baker                                             | Yes            | Amaryllidaceae            | M                         | 22°             | 2 <sup>z</sup>   | P                            | 13,448                 | 13.8    | 27.5    | 55.0    | 532                        | O                           | <i>Agave</i> sp. <sup>e</sup>   | FC:PI                |

|       |                                                                             |                |                           |   |     |                |                |                |                |      |      |                   |   |                               |       |
|-------|-----------------------------------------------------------------------------|----------------|---------------------------|---|-----|----------------|----------------|----------------|----------------|------|------|-------------------|---|-------------------------------|-------|
| 1509a | <i>Nerine filamentosa</i><br>W.F.Barker <sup>h</sup>                        | Yes            | Amaryllidaceae            | M | 22° | 2 <sup>z</sup> | P              | 9,633          | 9.9            | 19.7 | 39.4 | 532 <sup>ao</sup> | O | <i>Agave</i> sp. <sup>e</sup> | FC:PI |
| 1510a | <i>Nerine filifolia</i> Baker <sup>h</sup>                                  | Yes            | Amaryllidaceae            | M | 22° | 2 <sup>z</sup> | P              | 11,540         | 11.8           | 23.6 | 47.2 | 532 <sup>ao</sup> | O | <i>Agave</i> sp. <sup>e</sup> | FC:PI |
| 1511a | <i>Nerine frithii</i> L.Bolus                                               | Yes            | Amaryllidaceae            | M | 22° | 2 <sup>z</sup> | P              | 11,296         | 11.6           | 23.1 | 46.2 | 532               | O | <i>Agave</i> sp. <sup>e</sup> | FC:PI |
| 1512a | <i>Nerine gaberonensis</i><br>Bremek. & Oberm.                              | Yes            | Amaryllidaceae            | M | 22° | 2 <sup>z</sup> | P              | 8,802          | 9.0            | 18.0 | 36.0 | 532               | O | <i>Agave</i> sp. <sup>e</sup> | FC:PI |
| 1513a | <i>Nerine gibsonii</i><br>K.H.Douglas                                       | Yes            | Amaryllidaceae            | M | 22° | 2 <sup>z</sup> | P              | 10,758         | 11.0           | 22.0 | 44.0 | 532               | O | <i>Agave</i> sp. <sup>e</sup> | FC:PI |
| 1514a | <i>Nerine gracilis</i><br>R.A.Dyer <sup>h</sup>                             | Yes            | Amaryllidaceae            | M | 22° | 2 <sup>z</sup> | P              | 12,029         | 12.3           | 24.6 | 49.2 | 532 <sup>ao</sup> | O | <i>Agave</i> sp. <sup>e</sup> | FC:PI |
| 1515a | <i>Nerine humilis</i> (Jacq.)<br>Herb. <sup>h</sup>                         | Yes            | Amaryllidaceae            | M | 22° | 2 <sup>z</sup> | P              | 12,372         | 12.7           | 25.3 | 50.6 | 532 <sup>ao</sup> | O | <i>Agave</i> sp. <sup>e</sup> | FC:PI |
| 1516a | <i>Nerine krigei</i><br>W.F.Barker <sup>h</sup>                             | Yes            | Amaryllidaceae            | M | 22° | 2 <sup>z</sup> | P              | 15,844         | 16.2           | 32.4 | 64.8 | 532 <sup>ao</sup> | O | <i>Agave</i> sp. <sup>e</sup> | FC:PI |
| 1517a | <i>Nerine laticoma</i><br>Schonland subsp.<br><i>huttoniae</i> <sup>h</sup> | Yes            | Amaryllidaceae            | M | 22° | 2 <sup>z</sup> | P              | 13,105         | 13.4           | 26.8 | 53.6 | 532 <sup>ao</sup> | O | <i>Agave</i> sp. <sup>e</sup> | FC:PI |
| 1517b | <i>Nerine laticoma</i><br>T.Durand & Schinz. <sup>h</sup>                   | Yes            | Amaryllidaceae            | M | 22° | 2 <sup>z</sup> | P              | 13,203         | 13.5           | 27.0 | 54.0 | 532 <sup>ao</sup> | O | <i>Agave</i> sp. <sup>e</sup> | FC:PI |
| 1518a | <i>Nerine marincowitzii</i><br>Snijman                                      | Yes            | Amaryllidaceae            | M | 22° | 2 <sup>z</sup> | P              | 9,144          | 9.4            | 18.7 | 37.4 | 532               | O | <i>Agave</i> sp. <sup>e</sup> | FC:PI |
| 1519a | <i>Nerine masoniorum</i><br>L.Bolus <sup>h</sup>                            | Yes            | Amaryllidaceae            | M | 22° | 2 <sup>z</sup> | P              | 11,100         | 11.4           | 22.7 | 45.4 | 532 <sup>ao</sup> | O | <i>Agave</i> sp. <sup>e</sup> | FC:PI |
| 1520a | <i>Nerine pancratioides</i><br>Baker                                        | Yes            | Amaryllidaceae            | M | 22° | 2 <sup>z</sup> | P              | 10,709         | 11.0           | 21.9 | 43.8 | 532               | O | <i>Agave</i> sp. <sup>e</sup> | FC:PI |
| 1521a | <i>Nerine platypetala</i><br>G.McNeil                                       | Yes            | Amaryllidaceae            | M | 22° | 2 <sup>z</sup> | P              | 10,905         | 11.2           | 22.3 | 44.6 | 532               | O | <i>Agave</i> sp. <sup>e</sup> | FC:PI |
| 1522a | <i>Nerine pudica</i> Hook.f. <sup>h</sup>                                   | Yes            | Amaryllidaceae            | M | 22° | 2 <sup>z</sup> | P              | 12,812         | 13.1           | 26.2 | 52.4 | 532 <sup>ao</sup> | O | <i>Agave</i> sp. <sup>e</sup> | FC:PI |
| 1523a | <i>Nerine pusilla</i> Dinter                                                | Yes            | Amaryllidaceae            | M | 22° | 2 <sup>z</sup> | P              | 13,692         | 14.0           | 28.0 | 56.0 | 532               | O | <i>Agave</i> sp. <sup>e</sup> | FC:PI |
| 1524a | <i>Nerine rehmannii</i> (Baker)<br>L.Bolus <sup>h</sup>                     | Yes            | Amaryllidaceae            | M | 22° | 2 <sup>z</sup> | P              | 8,802          | 9.0            | 18.0 | 36.0 | 532 <sup>ao</sup> | O | <i>Agave</i> sp. <sup>e</sup> | FC:PI |
| 1525a | <i>Nerine ridleyi</i> Phillips                                              | Yes            | Amaryllidaceae            | M | 22° | 2 <sup>z</sup> | P              | 12,812         | 13.1           | 26.2 | 52.4 | 532               | O | <i>Agave</i> sp. <sup>e</sup> | FC:PI |
| 1526a | <i>Nerine ridleyi</i> Phillips                                              | Yes            | Amaryllidaceae            | M | 33° | 3 <sup>z</sup> | P              | – <sup>t</sup> | – <sup>t</sup> | 39.5 | 79.0 | 532               | O | <i>Agave</i> sp. <sup>e</sup> | FC:PI |
| 1527a | <i>Nerine sarniensis</i> (L.)<br>Herb. <sup>h</sup>                         | Yes            | Amaryllidaceae            | M | 22° | 2 <sup>z</sup> | P              | 12,665         | 13.0           | 25.9 | 51.8 | 532 <sup>ao</sup> | O | <i>Agave</i> sp. <sup>e</sup> | FC:PI |
| 1528a | <i>Nerine sarniensis</i> (L.)<br>Herb. <sup>h</sup>                         | Yes            | Amaryllidaceae            | M | 33° | 3 <sup>z</sup> | P              | – <sup>t</sup> | – <sup>t</sup> | 39.7 | 79.4 | 532 <sup>ao</sup> | O | <i>Agave</i> sp. <sup>e</sup> | FC:PI |
| 1529a | <i>Nerine undulata</i> (L.)<br>Herb. <sup>h</sup>                           | Yes            | Amaryllidaceae            | M | 22° | 2 <sup>z</sup> | P              | 13,888         | 14.2           | 28.4 | 56.8 | 532 <sup>ao</sup> | O | <i>Agave</i> sp. <sup>e</sup> | FC:PI |
| 1530a | <i>Neslia paniculata</i> (L.)<br>Desv.                                      | Yes            | Brassicaceae <sup>j</sup> | E | 14  | 2              | – <sup>q</sup> | 196            | 0.2            | 0.4  | 0.8  | 599               | O | L                             | FC:PI |
| 1531a | <i>Nicotiana arentsii</i><br>Goodsp.                                        | – <sup>m</sup> | Solanaceae                | E | 48  | 4              | P              | 4,944          | 5.1            | 10.1 | 20.2 | 566               | O | G                             | FC:PI |
| 1532a | <i>Nicotiana attenuata</i><br>Torrey ex S.Watson                            | – <sup>m</sup> | Solanaceae                | E | 24  | 2              | A              | 2,428          | 2.5            | 5.0  | 9.9  | 566               | O | G                             | FC:PI |
| 1533a | <i>Nicotiana clelandii</i><br>A.Gray                                        | – <sup>m</sup> | Solanaceae                | E | 48  | 4              | A              | 4,049          | 4.1            | 8.3  | 16.6 | 566               | O | G                             | FC:PI |
| 1534a | <i>Nicotiana glutinosa</i> L.                                               | – <sup>m</sup> | Solanaceae                | E | 24  | 2              | A              | 2,186          | 2.2            | 4.5  | 8.9  | 566               | O | <i>Solan.</i> <sup>e</sup>    | FC:PI |
| 1535a | <i>Nicotiana knightiana</i><br>Goodsp.                                      | – <sup>m</sup> | Solanaceae                | E | 24  | 2              | A              | 3,090          | 3.2            | 6.3  | 12.6 | 566               | O | G                             | FC:PI |
| 1536a | <i>Nicotiana nesophila</i><br>I.M.Johnston                                  | – <sup>m</sup> | Solanaceae                | E | 48  | 4              | A              | 4,922          | 5.0            | 10.1 | 20.1 | 566               | O | G                             | FC:PI |
| 1537a | <i>Nicotiana nudicaulis</i><br>S.Watson                                     | – <sup>m</sup> | Solanaceae                | E | 48  | 4              | A              | 3,477          | 3.6            | 7.1  | 14.2 | 566               | O | G                             | FC:PI |
| 1538a | <i>Nicotiana obtusifolia</i><br>M.Martens & Galeotti                        | – <sup>m</sup> | Solanaceae                | E | 24  | 2              | A              | 1,511          | 1.5            | 3.1  | 6.2  | 566               | O | <i>Solan.</i> <sup>e</sup>    | FC:PI |

Continued

| Entry number <sup>e</sup> | Species                                                                                                | Voucher        | Family                    | Higher group <sup>f</sup> | 2n <sup>‡</sup> | Ploidy level (x) | Life cycle type <sup>g</sup> | DNA amount             |         |         |         | Original ref. <sup>a</sup> | Present amount <sup>†</sup> | Standard species <sup>*b1</sup> | Method <sup>††</sup> |
|---------------------------|--------------------------------------------------------------------------------------------------------|----------------|---------------------------|---------------------------|-----------------|------------------|------------------------------|------------------------|---------|---------|---------|----------------------------|-----------------------------|---------------------------------|----------------------|
|                           |                                                                                                        |                |                           |                           |                 |                  |                              | 1C (Mbp <sup>s</sup> ) | 1C (pg) | 2C (pg) | 4C (pg) |                            |                             |                                 |                      |
| 1539a                     | <i>Nicotiana paniculata</i> L.                                                                         | – <sup>m</sup> | Solanaceae                | E                         | 24              | 2                | A                            | 2,880                  | 2.9     | 5.9     | 11.8    | 566                        | O                           | G                               | FC:PI                |
| 1540a                     | <i>Nicotiana quadrivalvis</i> Pursh.                                                                   | – <sup>m</sup> | Solanaceae                | E                         | 48              | 4                | A                            | 4,159                  | 4.3     | 8.5     | 17.0    | 566                        | O                           | F                               | FC:PI                |
| 1541a                     | <i>Nicotiana repanda</i> Willd.                                                                        | – <sup>m</sup> | Solanaceae                | E                         | 48              | 4                | A                            | 5,320                  | 5.4     | 10.9    | 21.8    | 566                        | O                           | H                               | FC:PI                |
| 1542a                     | <i>Nicotiana rustica</i> L.                                                                            | – <sup>m</sup> | Solanaceae                | E                         | 48              | 4                | A                            | 5,181                  | 5.3     | 10.6    | 21.2    | 566                        | O                           | G                               | FC:PI                |
| 1543a                     | <i>Nicotiana stocktonii</i> Brandegee                                                                  | – <sup>m</sup> | Solanaceae                | E                         | 48              | 4                | A                            | 4,888                  | 5.0     | 10.0    | 20.0    | 566                        | O                           | G                               | FC:PI                |
| 1544a                     | <i>Nicotiana sylvestris</i> Speg. & Comes                                                              | –              | Solanaceae                | E                         | 24              | 2                | P                            | 2,636                  | 2.7     | 5.4     | 10.8    | 566                        | O                           | G                               | FC:PI                |
| 1545a                     | <i>Nicotiana tabacum</i> L.                                                                            | – <sup>m</sup> | Solanaceae                | E                         | 48              | 4                | A                            | 5,061                  | 5.2     | 10.4    | 20.7    | 566                        | O                           | G                               | Fe                   |
| 1545m                     | <i>Nicotiana tabacum</i> L.                                                                            | No             | Solanaceae                | E                         | – <sup>n</sup>  | – <sup>p</sup>   | A                            | 4,778                  | 4.9     | 9.8     | 19.5    | 492                        | O                           | C <sup>c</sup>                  | FC:PI                |
| 1546a                     | <i>Nicotiana tomentosiformis</i> Goodsp.                                                               | – <sup>m</sup> | Solanaceae                | E                         | 24              | 2                | P                            | 2,682                  | 2.7     | 5.5     | 11.0    | 566                        | O                           | G                               | FC:PI                |
| 1547a                     | <i>Nicotiana undulata</i> Ruiz & Pav.                                                                  | – <sup>m</sup> | Solanaceae                | E                         | 24              | 2                | A                            | 2,362                  | 2.4     | 4.8     | 9.7     | 566                        | O                           | G                               | FC:PI                |
| 1548a                     | <i>Nicotiana wigandioides</i> Koch & Fintelm.                                                          | – <sup>m</sup> | Solanaceae                | E                         | 24              | 2                | P                            | 2,782                  | 2.8     | 5.7     | 11.4    | 566                        | O                           | G                               | FC:PI                |
| 1549a                     | <i>Nipponanthemum nipponicum</i> (Franchet ex Maxim.) S.Kitamura                                       | Yes            | Asteraceae <sup>j</sup>   | E                         | 18              | 2                | P                            | 5,804                  | 5.9     | 11.9    | 23.7    | 521                        | O                           | G <sup>c</sup>                  | FC:PI                |
| 1550a                     | <i>Noccaea alpestris</i> (Jacq.) Kuerguelen                                                            | Yes            | Brassicaceae <sup>j</sup> | E                         | 14              | 2                | – <sup>q</sup>               | 235                    | 0.2     | 0.5     | 1.0     | 599                        | O                           | L                               | FC:PI                |
| 1551a                     | <i>Nopalea cochenillifera</i> (L.) A.Lyons                                                             | Yes            | Cactaceae                 | E                         | 22              | 2                | P                            | 958                    | 1.0     | 2.0     | 3.9     | 557                        | O                           | G <sup>c</sup>                  | FC:PI                |
| 1552a                     | <i>Notholirion thomsonianum</i> (Royle) Stapf.                                                         | Yes            | Liliaceae                 | M                         | c. 24           | 2                | P                            | 34,499                 | 35.3    | 70.6    | 141.1   | 565                        | O                           | B                               | Fe                   |
| 1553b                     | <i>Notylia barkeri</i> Lindl.                                                                          | Yes            | Orchidaceae               | M                         | – <sup>n</sup>  | – <sup>p</sup>   | P                            | 1,076                  | 1.1     | 2.2     | 4.4     | 504 <sup>ah</sup>          | O                           | – <sup>w</sup>                  | FC:DAPI              |
| 1554a                     | <i>Ocotea foetens</i> (Aiton) Baill.                                                                   | – <sup>m</sup> | Lauraceae                 | BA                        | 24 <sup>o</sup> | 4                | P                            | 1,169                  | 1.2     | 2.4     | 4.8     | 552                        | O                           | <i>Solan.</i> <sup>c</sup>      | FC:PI                |
| 1555a                     | <i>Olea cerasiformis</i> Rivas Mart. & Del Arco                                                        | Yes            | Oleaceae                  | E                         | 46 <sup>o</sup> | 2                | P                            | 1,462                  | 1.5     | 3.0     | 6.0     | 588                        | O                           | G <sup>c</sup>                  | FC:PI                |
| 1556c                     | <i>Olea europaea</i> L.                                                                                | No             | Oleaceae                  | E                         | – <sup>n</sup>  | – <sup>p</sup>   | P                            | 1,472                  | 1.5     | 3.0     | 6.0     | 501 <sup>ag</sup>          | O                           | B <sup>c</sup>                  | Fe                   |
| 1556d                     | <i>Olea europaea</i> L. subsp. <i>europaea</i>                                                         | No             | Oleaceae                  | E                         | – <sup>n</sup>  | – <sup>p</sup>   | P                            | 1,584                  | 1.6     | 3.2     | 6.5     | 563                        | O                           | G <sup>c</sup>                  | FC:PI                |
| 1556e                     | <i>Olea europaea</i> L. subsp. <i>europaea</i> var. <i>sylvestris</i>                                  | No             | Oleaceae                  | E                         | 46 <sup>o</sup> | 2                | P                            | 1,560                  | 1.6     | 3.2     | 6.4     | 586                        | O                           | G <sup>c</sup>                  | FC:PI                |
| 1556f                     | <i>Olea europaea</i> L. subsp. <i>europaea</i> var. <i>europaea</i> cv. <i>Santulhana</i> <sup>h</sup> | No             | Oleaceae                  | E                         | 46 <sup>o</sup> | 2                | P                            | 1,501                  | 1.5     | 3.1     | 6.1     | 586                        | O                           | G <sup>c</sup>                  | FC:PI                |
| 1556g                     | <i>Olea europaea</i> L. subsp. <i>europaea</i> var. <i>europaea</i> cv. <i>Verdeal</i> <sup>h</sup>    | No             | Oleaceae                  | E                         | 46 <sup>o</sup> | 2                | P                            | 1,418                  | 1.5     | 2.9     | 5.8     | 586                        | O                           | G <sup>c</sup>                  | FC:PI                |
| 1556h                     | <i>Olea europaea</i> L. subsp. <i>europaea</i> var. <i>europaea</i>                                    | Yes            | Oleaceae                  | E                         | 46 <sup>o</sup> | 2                | P                            | 1,516                  | 1.6     | 3.1     | 6.2     | 588                        | O                           | G <sup>c</sup>                  | FC:PI                |

|       |                                                                                        |                |                           |   |                |                |                |       |     |      |      |                   |   |                |         |
|-------|----------------------------------------------------------------------------------------|----------------|---------------------------|---|----------------|----------------|----------------|-------|-----|------|------|-------------------|---|----------------|---------|
| 1556i | <i>Olea europaea</i> L. subsp. <i>europaea</i> var. <i>sylvestris</i>                  | Yes            | Oleaceae                  | E | 46°            | 2              | P              | 1,555 | 1.6 | 3.2  | 6.4  | 588               | O | G <sup>c</sup> | FC:PI   |
| 1557a | <i>Olea maderensis</i> (Lowe) Rivas Mart. & Del Arco                                   | Yes            | Oleaceae                  | E | 92°            | 4              | P              | 2,919 | 3.0 | 6.0  | 11.9 | 588               | O | G <sup>c</sup> | FC:PI   |
| 1558a | <i>Olearia pimeleoides</i> (D.C.) Benth.                                               | – <sup>m</sup> | Asteraceae <sup>j</sup>   | E | – <sup>n</sup> | – <sup>p</sup> | – <sup>q</sup> | 5,990 | 6.1 | 12.3 | 24.5 | 526               | O | A              | FC:PI   |
| 1559a | <i>Olimarabidopsis cabulica</i> (Hook.f. & Thomson) Al-Shehbaz, O’Kane & R.A.Price     | Yes            | Brassicaceae <sup>j</sup> | E | 48°            | 6              | – <sup>q</sup> | 518   | 0.5 | 1.1  | 2.1  | 599               | O | L              | FC:PI   |
| 1559b | <i>Olimarabidopsis cabulica</i> (J.D.Hooker & Thompson) Al-Shehbaz, O’Kane & R.A.Price | – <sup>m</sup> | Brassicaceae <sup>j</sup> | E | 48°            | – <sup>p</sup> | – <sup>q</sup> | 411   | 0.4 | 0.8  | 1.7  | 509               | O | – <sup>w</sup> | FC:PI   |
| 1560a | <i>Olimarabidopsis pumila</i> (Stephan) Al-Shehbaz, O’Kane & R.A.Price                 | Yes            | Brassicaceae <sup>j</sup> | E | 32             | 4              | – <sup>q</sup> | 342   | 0.4 | 0.7  | 1.4  | 599               | O | L              | FC:PI   |
| 1560b | <i>Olimarabidopsis pumila</i> (Stephan) Al-Shehbaz, O’Kane & R.A.Price                 | – <sup>m</sup> | Brassicaceae <sup>j</sup> | E | 30             | 4?             | – <sup>q</sup> | 407   | 0.4 | 0.8  | 1.7  | 509               | O | – <sup>w</sup> | FC:PI   |
| 1561b | <i>Oncidium leucochilum</i> Bateman                                                    | Yes            | Orchidaceae               | M | – <sup>n</sup> | – <sup>p</sup> | P              | 587   | 0.6 | 1.2  | 2.4  | 504 <sup>ah</sup> | O | – <sup>w</sup> | FC:DAPI |
| 1562a | <i>Oplismenus hirtellus</i> (R.Br.) U.Scholz subsp. <i>imbecillis</i> <sup>i</sup>     | Yes            | Poaceae <sup>j</sup>      | M | 54             | 6              | P              | 2,577 | 2.6 | 5.3  | 10.5 | 528               | O | – <sup>w</sup> | FC:PI   |
| 1563a | <i>Opuntia acaulis</i> Ekman & Werderm.                                                | Yes            | Cactaceae                 | E | – <sup>n</sup> | 8              | P              | 3,716 | 3.8 | 7.6  | 15.2 | 557               | O | G <sup>c</sup> | FC:PI   |
| 1564a | <i>Opuntia dillenii</i> Haw.                                                           | Yes            | Cactaceae                 | E | – <sup>n</sup> | 6              | P              | 2,225 | 2.3 | 4.6  | 9.1  | 557               | O | G <sup>c</sup> | FC:PI   |
| 1565c | <i>Ornithogalum longibracteatum</i> Jacq.                                              | No             | Asparagaceae              | M | – <sup>n</sup> | – <sup>p</sup> | P              | 7,744 | 7.9 | 15.8 | 31.7 | 518               | O | C <sup>c</sup> | FC:PI   |
| 1566a | <i>Orobanche alba</i> Steph. ex Willd. <sup>i</sup>                                    | Yes            | Orobanchaceae             | E | 38             | 2              | P              | 2,726 | 2.8 | 5.6  | 11.2 | 531               | O | G <sup>c</sup> | CIA     |
| 1566b | <i>Orobanche alba</i> Steph. ex Willd. <sup>i</sup>                                    | Yes            | Orobanchaceae             | E | 38             | 2              | P              | 3,101 | 3.2 | 6.3  | 12.7 | 531               | O | G <sup>c</sup> | CIA     |
| 1567a | <i>Orobanche alsatica</i> Kirschl. subsp. <i>libanotidis</i> <sup>i</sup>              | Yes            | Orobanchaceae             | E | 38             | 2              | P              | 2,550 | 2.6 | 5.2  | 10.4 | 531               | O | G <sup>c</sup> | CIA     |
| 1568a | <i>Orobanche amethystea</i> Thuill. <sup>i</sup>                                       | Yes            | Orobanchaceae             | E | 38             | 2              | P              | 1,756 | 1.8 | 3.6  | 7.2  | 531               | O | G <sup>c</sup> | CIA     |
| 1568b | <i>Orobanche amethystea</i> Thuill. <sup>i</sup>                                       | Yes            | Orobanchaceae             | E | 38             | 2              | P              | 2,164 | 2.2 | 4.4  | 8.9  | 531               | O | G <sup>c</sup> | CIA     |
| 1569a | <i>Orobanche anatolica</i> Reut. <sup>i</sup>                                          | Yes            | Orobanchaceae             | E | 38             | 2              | P              | 4,584 | 4.7 | 9.4  | 18.7 | 531               | O | G <sup>c</sup> | CIA     |
| 1569b | <i>Orobanche anatolica</i> Reut. <sup>i</sup>                                          | Yes            | Orobanchaceae             | E | 38             | 2              | P              | 5,320 | 5.4 | 10.9 | 21.8 | 531               | O | G <sup>c</sup> | CIA     |
| 1570a | <i>Orobanche austrohispanica</i> M.J.Y.Foley                                           | Yes            | Orobanchaceae             | E | 76             | 4              | P              | 1,848 | 1.9 | 3.8  | 7.6  | 531               | O | G <sup>c</sup> | CIA     |
| 1571a | <i>Orobanche caryophyllacea</i> Sm. <sup>i</sup>                                       | Yes            | Orobanchaceae             | E | 38             | 2              | P              | 3,485 | 3.6 | 7.1  | 14.3 | 531               | O | G <sup>c</sup> | CIA     |
| 1572a | <i>Orobanche cernua</i> Loeffl. var. <i>cumana</i>                                     | Yes            | Orobanchaceae             | E | 38             | 2              | AP             | 1,418 | 1.5 | 2.9  | 5.8  | 531               | O | G <sup>c</sup> | CIA     |

Continued

| Entry number <sup>e</sup> | Species                                                      | Voucher | Family                    | Higher group <sup>#</sup> | 2n <sup>‡</sup> | Ploidy level (x) | Life cycle type <sup>§</sup> | DNA amount             |         |         |         | Original ref. <sup>3</sup> | Present amount <sup>†</sup> | Standard species <sup>*b1</sup> | Method <sup>††</sup> |
|---------------------------|--------------------------------------------------------------|---------|---------------------------|---------------------------|-----------------|------------------|------------------------------|------------------------|---------|---------|---------|----------------------------|-----------------------------|---------------------------------|----------------------|
|                           |                                                              |         |                           |                           |                 |                  |                              | 1C (Mbp <sup>s</sup> ) | 1C (pg) | 2C (pg) | 4C (pg) |                            |                             |                                 |                      |
| 1572b                     | <i>Orobanche cernua</i> Loeffl. var. <i>cernua</i>           | Yes     | Orobanchaceae             | E                         | 38              | 2                | P                            | 1,674                  | 1.7     | 3.4     | 6.8     | 531                        | O                           | G <sup>c</sup>                  | CIA                  |
| 1573a                     | <i>Orobanche crenata</i> Forsk.                              | Yes     | Orobanchaceae             | E                         | 38              | 2                | A                            | 2,781                  | 2.8     | 5.7     | 11.4    | 531                        | O                           | G <sup>c</sup>                  | CIA                  |
| 1574a                     | <i>Orobanche densiflora</i> Salzm. ex Reut. <sup>i, an</sup> | Yes     | Orobanchaceae             | E                         | 76              | 4                | P                            | 1,752                  | 1.8     | 3.6     | 7.2     | 531 <sup>an</sup>          | O                           | G <sup>c</sup>                  | CIA                  |
| 1574b                     | <i>Orobanche densiflora</i> Salzm. ex Reut. <sup>i, an</sup> | Yes     | Orobanchaceae             | E                         | 76              | 4                | P                            | 2,152                  | 2.2     | 4.4     | 8.8     | 531 <sup>an</sup>          | O                           | G <sup>c</sup>                  | CIA                  |
| 1575a                     | <i>Orobanche gracilis</i> Sm. <sup>i</sup>                   | Yes     | Orobanchaceae             | E                         | 76              | 4                | P                            | 1,621                  | 1.7     | 3.3     | 6.6     | 531                        | O                           | G <sup>c</sup>                  | CIA                  |
| 1575b                     | <i>Orobanche gracilis</i> Sm. <sup>i</sup>                   | Yes     | Orobanchaceae             | E                         | 76              | 4                | P                            | 2,392                  | 2.4     | 4.9     | 9.8     | 531                        | O                           | G <sup>c</sup>                  | CIA                  |
| 1576a                     | <i>Orobanche gracilis</i> Sm.                                | Yes     | Orobanchaceae             | E                         | 114             | 6                | P                            | 1,825                  | 1.9     | 3.7     | 7.5     | 531                        | O                           | G <sup>c</sup>                  | CIA                  |
| 1577a                     | <i>Orobanche grossheimii</i> Novopokr.                       | Yes     | Orobanchaceae             | E                         | 38              | 2                | P                            | 3,466                  | 3.5     | 7.1     | 14.2    | 531                        | O                           | G <sup>c</sup>                  | CIA                  |
| 1578a                     | <i>Orobanche hederæ</i> Duby                                 | Yes     | Orobanchaceae             | E                         | 38              | 2                | P                            | 2,275                  | 2.3     | 4.7     | 9.3     | 531                        | O                           | G <sup>c</sup>                  | CIA                  |
| 1579a                     | <i>Orobanche latisquama</i> (F.Schultz) Batt. <sup>i</sup>   | Yes     | Orobanchaceae             | E                         | 76              | 4                | P                            | 3,305                  | 3.4     | 6.8     | 13.5    | 531                        | O                           | G <sup>c</sup>                  | CIA                  |
| 1580a                     | <i>Orobanche lutea</i> Baumg.                                | Yes     | Orobanchaceae             | E                         | 38              | 2                | P                            | 2,420                  | 2.5     | 4.9     | 9.9     | 531                        | O                           | G <sup>c</sup>                  | CIA                  |
| 1581a                     | <i>Orobanche minor</i> Sutt. <sup>i</sup>                    | Yes     | Orobanchaceae             | E                         | 38              | 2                | AP                           | 1,789                  | 1.8     | 3.7     | 7.3     | 531                        | O                           | G <sup>c</sup>                  | CIA                  |
| 1581b                     | <i>Orobanche minor</i> Sutt. <sup>i</sup>                    | Yes     | Orobanchaceae             | E                         | 38              | 2                | AP                           | 2,663                  | 2.7     | 5.4     | 10.9    | 531                        | O                           | G <sup>c</sup>                  | CIA                  |
| 1582a                     | <i>Orobanche owerinii</i> (G.Beck) G.Beck <sup>i</sup>       | Yes     | Orobanchaceae             | E                         | 38              | 2                | P                            | 3,112                  | 3.2     | 6.4     | 12.7    | 531                        | O                           | G <sup>c</sup>                  | CIA                  |
| 1583a                     | <i>Orobanche picridis</i> F.Schultz                          | Yes     | Orobanchaceae             | E                         | 38              | 2                | A                            | 2,724                  | 2.8     | 5.6     | 11.1    | 531                        | O                           | G <sup>c</sup>                  | CIA                  |
| 1584a                     | <i>Orobanche raddeana</i> G.Beck                             | Yes     | Orobanchaceae             | E                         | 38              | 2                | P                            | 3,486                  | 3.6     | 7.1     | 14.3    | 531                        | O                           | G <sup>c</sup>                  | CIA                  |
| 1585a                     | <i>Orobanche rapum-genistae</i> Thuill.                      | Yes     | Orobanchaceae             | E                         | 38              | 2                | P                            | 2,510                  | 2.6     | 5.1     | 10.3    | 531                        | O                           | G <sup>c</sup>                  | CIA                  |
| 1586a                     | <i>Orobanche teucrii</i> Holandre                            | Yes     | Orobanchaceae             | E                         | 38              | 2                | P                            | 3,397                  | 3.5     | 6.9     | 13.9    | 531                        | O                           | G <sup>c</sup>                  | CIA                  |
| 1587a                     | <i>Orobanche transcaucasica</i> Tzvel.                       | Yes     | Orobanchaceae             | E                         | 38              | 2                | P                            | 3,115                  | 3.2     | 6.4     | 12.7    | 531                        | O                           | G <sup>c</sup>                  | CIA                  |
| 1588a                     | <i>Orobanche transcaucasica</i> Tzvel. <sup>i</sup>          | Yes     | Orobanchaceae             | E                         | 76              | 4                | P                            | 5,677                  | 5.8     | 11.6    | 23.2    | 531                        | O                           | G <sup>c</sup>                  | CIA                  |
| 1589a                     | <i>Orthophytum saxicola</i> (Ule) L.B.Sm.                    | Yes     | Bromeliaceae              | M                         | 50              | 2                | P                            | 313                    | 0.3     | 0.6     | 1.3     | 571                        | O                           | <i>Glycine</i> <sup>c</sup>     | FC:PI                |
| 1590a                     | <i>Orychophragmus violaceus</i> (L.) O.E. Schulz             | No      | Brassicaceae <sup>j</sup> | E                         | 24              | 2                | P                            | 1,440                  | 1.5     | 2.9     | 5.9     | 602                        | O                           | <i>Solan.</i> <sup>c</sup>      | FC:PI                |
| 1591a                     | <i>Oryza alta</i> Swallen                                    | Yes     | Poaceae <sup>j</sup>      | M                         | 48 <sup>o</sup> | 4                | P                            | 1,022                  | 1.0     | 2.1     | 4.2     | 545                        | O                           | K <sup>c</sup>                  | FC:PI                |
| 1592d                     | <i>Oryza australiensis</i> Domin                             | Yes     | Poaceae <sup>j</sup>      | M                         | 24 <sup>o</sup> | 2                | P                            | 978                    | 1.0     | 2.0     | 4.0     | 545                        | O                           | K <sup>c</sup>                  | FC:PI                |
| 1593b                     | <i>Oryza brachyantha</i> A.Chev. & Roehrich                  | Yes     | Poaceae <sup>j</sup>      | M                         | 24 <sup>o</sup> | 2                | A                            | 367                    | 0.4     | 0.8     | 1.5     | 545                        | O                           | K <sup>c</sup>                  | FC:PI                |
| 1594b                     | <i>Oryza granulata</i> Nees                                  | Yes     | Poaceae <sup>j</sup>      | M                         | 24 <sup>o</sup> | 2                | P                            | 895                    | 0.9     | 1.8     | 3.7     | 545                        | O                           | K <sup>c</sup>                  | FC:PI                |
| 1595a                     | <i>Oryza nivara</i> S.D.Sharma & Shastry                     | Yes     | Poaceae <sup>j</sup>      | M                         | 24 <sup>o</sup> | 2                | A                            | 455                    | 0.5     | 0.9     | 1.9     | 545                        | O                           | K <sup>c</sup>                  | FC:PI                |
| 1596a                     | <i>Oryza officinalis</i> Wall.                               | Yes     | Poaceae <sup>j</sup>      | M                         | 24 <sup>o</sup> | 2                | P                            | 660                    | 0.7     | 1.4     | 2.7     | 545                        | O                           | K <sup>c</sup>                  | FC:PI                |
| 1597b                     | <i>Oryza punctata</i> Kotschy ex Steud.                      | Yes     | Poaceae <sup>j</sup>      | M                         | 24 <sup>o</sup> | 2                | A                            | 430                    | 0.4     | 0.9     | 1.8     | 545                        | O                           | K <sup>c</sup>                  | FC:PI                |
| 1598a                     | <i>Oryza ridleyi</i> Hook.f.                                 | Yes     | Poaceae <sup>j</sup>      | M                         | 48 <sup>o</sup> | 4                | P                            | 1,301                  | 1.3     | 2.7     | 5.3     | 545                        | O                           | K <sup>c</sup>                  | FC:PI                |

|       |                                                                                                      |                |                           |   |                |                |                |                |                |       |       |                   |   |                               |       |
|-------|------------------------------------------------------------------------------------------------------|----------------|---------------------------|---|----------------|----------------|----------------|----------------|----------------|-------|-------|-------------------|---|-------------------------------|-------|
| 1599a | <i>Oryza rufipogon</i> Griff.                                                                        | Yes            | Poaceae <sup>j</sup>      | M | 24°            | 2              | P              | 445            | 0.5            | 0.9   | 1.8   | 545               | O | K <sup>c</sup>                | FC:PI |
| 1600v | <i>Oryza sativa</i> L. subsp.<br><i>japonica</i>                                                     | No             | Poaceae <sup>j</sup>      | M | – <sup>n</sup> | – <sup>p</sup> | P              | 577            | 0.6            | 1.2   | 2.4   | 492               | O | <i>Raphanus</i> <sup>c</sup>  | FC:PI |
| 1601a | <i>Oxalis pes-caprae</i><br>L. (long-styled morph)                                                   | Yes            | Oxalidaceae               | E | 28°            | 4              | P              | 670            | 0.7            | 1.4   | 2.7   | 590               | O | G <sup>c</sup>                | FC:PI |
| 1602a | <i>Oxalis pes-caprae</i><br>L. (short-styled morph)                                                  | Yes            | Oxalidaceae               | E | 35°            | 5              | P              | – <sup>t</sup> | – <sup>t</sup> | 1.7   | 3.3   | 590               | O | G <sup>c</sup>                | FC:PI |
| 1603a | <i>Pachycladon exilis</i><br>(Heenan) Heenan &<br>A.D.Mitch                                          | Yes            | Brassicaceae <sup>j</sup> | E | 20             | – <sup>p</sup> | – <sup>q</sup> | 430            | 0.4            | 0.9   | 1.8   | 599               | O | L                             | FC:PI |
| 1604a | <i>Pachycladon fastigiata</i><br>(Hook.f.) Heenan &<br>A.D.Mitch                                     | Yes            | Brassicaceae <sup>j</sup> | E | 20             | – <sup>p</sup> | – <sup>q</sup> | 499            | 0.5            | 1.0   | 2.0   | 599               | O | L                             | FC:PI |
| 1605a | <i>Pachycladon<br/>novae-zelandiae</i><br>(Hook.f.) Hook.f.                                          | Yes            | Brassicaceae <sup>j</sup> | E | 20             | – <sup>p</sup> | – <sup>q</sup> | 538            | 0.6            | 1.1   | 2.2   | 599               | O | L                             | FC:PI |
| 1606a | <i>Pandanus fascicularis</i><br>Lam. spinous<br>morphotype <sup>aw</sup>                             | No             | Pandanaceae               | M | 60             | – <sup>p</sup> | P              | 1,467          | 1.5            | 3.0   | 6.0   | 558 <sup>aw</sup> | O | B <sup>c</sup>                | Fe    |
| 1606b | <i>Pandanus fascicularis</i><br>Lam. spineless<br>morphotype <sup>aw</sup>                           | No             | Pandanaceae               | M | 60             | – <sup>p</sup> | P              | 1,812          | 1.9            | 3.7   | 7.4   | 558 <sup>aw</sup> | O | B <sup>c</sup>                | Fe    |
| 1606c | <i>Pandanus fascicularis</i><br>Lam. ketaki<br>morphotype <sup>aw</sup>                              | No             | Pandanaceae               | M | 60             | – <sup>p</sup> | P              | 2,504          | 2.6            | 5.1   | 10.2  | 558 <sup>aw</sup> | O | B <sup>c</sup>                | Fe    |
| 1607e | <i>Papaver rhoeas</i> <sup>l</sup>                                                                   | No             | Papaveraceae              | E | – <sup>n</sup> | – <sup>p</sup> | A              | 5,379          | 5.5            | 11.0  | 22.0  | 563               | O | H <sup>c</sup>                | FC:PI |
| 1608a | <i>Paracautleya bhatii</i> R.M.<br>Sm. (= <i>Curcuma batii</i><br>(R.M. Sm.) Škorničk.<br>& M. Sabu) | Yes            | Zingiberaceae             | M | 42             | 6              | P              | 1,066          | 1.1            | 2.2   | 4.4   | 562               | O | <i>Glycine</i> <sup>c</sup>   | FC:PI |
| 1609a | <i>Parietaria officinalis</i> L.                                                                     | No             | Urticaceae                | E | – <sup>n</sup> | – <sup>p</sup> | P              | 553            | 0.6            | 1.1   | 2.3   | 492               | O | <i>Raphanus</i> <sup>c</sup>  | FC:PI |
| 1610a | <i>Paris japonica</i> (Franch.<br>& Sav.) Franch.                                                    | Yes            | Melanthiaceae             | M | 40             | 8              | P              | 148,852        | 152.2          | 304.4 | 608.8 | 617               | O | B                             | FC:PI |
| 1611a | <i>Parolinia intermedia</i><br>Swent. & Bramwell                                                     | – <sup>m</sup> | Brassicaceae <sup>j</sup> | E | 22°            | 2              | P              | 993            | 1.0            | 2.0   | 4.1   | 552               | O | <i>Glycine</i> <sup>c</sup>   | FC:PI |
| 1612a | <i>Paronychia canariensis</i><br>(L.f.) Juss.                                                        | – <sup>m</sup> | Caryophyllaceae           | E | 32°            | 4              | P              | 1,311          | 1.3            | 2.7   | 5.4   | 477               | O | <i>Solan.</i> <sup>c</sup>    | FC:PI |
| 1613a | <i>Parrya nudicaulis</i> (L.)<br>Regel                                                               | Yes            | Brassicaceae <sup>j</sup> | E | 14             | 2              | – <sup>q</sup> | 1,056          | 1.1            | 2.2   | 4.3   | 599               | O | L                             | FC:PI |
| 1614a | <i>Parthenocissus<br/>quinquefolia</i> (L.)<br>Planchon                                              | Yes            | Vitaceae                  | E | – <sup>n</sup> | – <sup>p</sup> | P              | 3,110          | 3.2            | 6.4   | 12.7  | 489               | O | – <sup>w</sup>                | FC:EB |
| 1615a | <i>Paspalum orbiculare</i><br>G.Forst                                                                | Yes            | Poaceae <sup>j</sup>      | M | 63             | 6              | P              | 1,531          | 1.6            | 3.1   | 6.3   | 528               | O | – <sup>w</sup>                | FC:PI |
| 1615b | <i>Paspalum orbiculare</i><br>G.Frost                                                                | Yes            | Poaceae <sup>j</sup>      | M | 63             | 6              | P              | 914            | 0.9            | 1.9   | 3.7   | 476               | O | <i>Actinidia</i> <sup>c</sup> | FC:PI |
| 1615c | <i>Paspalum orbiculare</i><br>G.Frost <sup>i</sup>                                                   | Yes            | Poaceae <sup>j</sup>      | M | 63             | 6              | P              | 1,037          | 1.1            | 2.1   | 4.2   | 476               | O | <i>Actinidia</i> <sup>c</sup> | FC:PI |
| 1616a | <i>Passiflora amethystina</i><br>Mikan                                                               | Yes            | Passifloraceae            | E | 18°            | 2              | P              | 1,643          | 1.7            | 3.4   | 6.7   | 603               | O | H <sup>c</sup>                | FC:PI |
| 1617a | <i>Passiflora caerulea</i> L.                                                                        | Yes            | Passifloraceae            | E | 18°            | 2              | P              | 1,540          | 1.6            | 3.2   | 6.3   | 603               | O | H <sup>c</sup>                | FC:PI |
| 1618a | <i>Passiflora cincinnata</i><br>Mast.                                                                | Yes            | Passifloraceae            | E | 18°            | 2              | P              | 1,389          | 1.4            | 2.8   | 5.7   | 603               | O | H <sup>c</sup>                | FC:PI |
| 1619a | <i>Passiflora coccinea</i> Aubl.                                                                     | Yes            | Passifloraceae            | E | 18°            | 2              | P              | 1,584          | 1.6            | 3.2   | 6.5   | 603               | O | H <sup>c</sup>                | FC:PI |
| 1620a | <i>Passiflora edmundoi</i><br>Sacco                                                                  | Yes            | Passifloraceae            | E | 18°            | 2              | P              | 1,677          | 1.7            | 3.4   | 6.9   | 467               | O | H <sup>c</sup>                | FC:PI |

Continued

| Entry number <sup>e</sup> | Species                                                                                                    | Voucher        | Family                    | Higher group <sup>f</sup> | 2n <sup>‡</sup> | Ploidy level (x) | Life cycle type <sup>g</sup> | DNA amount             |         |         |         | Original ref. <sup>a</sup> | Present amount <sup>†</sup> | Standard species <sup>*b1</sup> | Method <sup>††</sup> |
|---------------------------|------------------------------------------------------------------------------------------------------------|----------------|---------------------------|---------------------------|-----------------|------------------|------------------------------|------------------------|---------|---------|---------|----------------------------|-----------------------------|---------------------------------|----------------------|
|                           |                                                                                                            |                |                           |                           |                 |                  |                              | 1C (Mbp <sup>s</sup> ) | 1C (pg) | 2C (pg) | 4C (pg) |                            |                             |                                 |                      |
| 1621a                     | <i>Passiflora edulis</i><br>Sims. f. <i>edulis</i>                                                         | Yes            | Passifloraceae            | E                         | 18°             | 2                | P                            | 1,545                  | 1.6     | 3.2     | 6.3     | 467                        | O                           | H <sup>c</sup>                  | FC:PI                |
| 1621b                     | <i>Passiflora edulis</i><br>Sims. f. <i>flavicarpa</i> <sup>i</sup>                                        | Yes            | Passifloraceae            | E                         | 18°             | 2                | P                            | 1,570                  | 1.6     | 3.2     | 6.4     | 467                        | O                           | H <sup>c</sup>                  | FC:PI                |
| 1622a                     | <i>Passiflora foetida</i> L.                                                                               | Yes            | Passifloraceae            | E                         | 20°             | 2                | P                            | 1,359                  | 1.4     | 2.8     | 5.6     | 603                        | O                           | H <sup>c</sup>                  | FC:PI                |
| 1623a                     | <i>Passiflora galbana</i> Mast.                                                                            | Yes            | Passifloraceae            | E                         | 18°             | 2                | P                            | 1,721                  | 1.8     | 3.5     | 7.0     | 603                        | O                           | H <sup>c</sup>                  | FC:PI                |
| 1624a                     | <i>Passiflora giberti</i><br>N.E.Brown                                                                     | Yes            | Passifloraceae            | E                         | 18°             | 2                | P                            | 1,917                  | 2.0     | 3.9     | 7.8     | 467                        | O                           | H <sup>c</sup>                  | FC:PI                |
| 1625a                     | <i>Passiflora laurifolia</i> L.                                                                            | Yes            | Passifloraceae            | E                         | 18°             | 2                | P                            | 1,897                  | 1.9     | 3.9     | 7.8     | 467                        | O                           | H <sup>c</sup>                  | FC:PI                |
| 1626a                     | <i>Passiflora maliformis</i> L.                                                                            | Yes            | Passifloraceae            | E                         | 18°             | 2                | P                            | 1,848                  | 1.9     | 3.8     | 7.6     | 603                        | O                           | H <sup>c</sup>                  | FC:PI                |
| 1627a                     | <i>Passiflora marifloia</i> Mast.                                                                          | Yes            | Passifloraceae            | E                         | 12°             | 2                | P                            | 1,359                  | 1.4     | 2.8     | 5.6     | 603                        | O                           | H <sup>c</sup>                  | FC:PI                |
| 1628a                     | <i>Passiflora miersii</i> Mast.                                                                            | Yes            | Passifloraceae            | E                         | 18°             | 2                | P                            | 1,369                  | 1.4     | 2.8     | 5.6     | 603                        | O                           | H <sup>c</sup>                  | FC:PI                |
| 1629a                     | <i>Passiflora mucronata</i><br>Lam.                                                                        | Yes            | Passifloraceae            | E                         | 18°             | 2                | P                            | 1,663                  | 1.7     | 3.4     | 6.8     | 467                        | O                           | H <sup>c</sup>                  | FC:PI                |
| 1630a                     | <i>Passiflora nitida</i> Kunth                                                                             | Yes            | Passifloraceae            | E                         | 18°             | 2                | P                            | 2,357                  | 2.4     | 4.8     | 9.6     | 603                        | O                           | H-1629a                         | FC:PI                |
| 1631a                     | <i>Passiflora pentagona</i><br>Mast.                                                                       | Yes            | Passifloraceae            | E                         | 24°             | 4                | P                            | 1,795                  | 1.8     | 3.7     | 7.3     | 603                        | O                           | H <sup>c</sup>                  | FC:PI                |
| 1632a                     | <i>Passiflora</i><br><i>quadrangularis</i> L.                                                              | Yes            | Passifloraceae            | E                         | 18°             | 2                | P                            | 2,621                  | 2.7     | 5.4     | 10.7    | 467                        | O                           | H-1629a                         | FC:PI                |
| 1633a                     | <i>Passiflora</i><br><i>serrato-digitata</i> L.                                                            | Yes            | Passifloraceae            | E                         | 18°             | 2                | P                            | 1,814                  | 1.9     | 3.7     | 7.4     | 603                        | O                           | <i>Solan.</i> <sup>c</sup>      | FC:PI                |
| 1634a                     | <i>Passiflora suberosa</i> L.                                                                              | Yes            | Passifloraceae            | E                         | 24°             | 4                | P                            | 895                    | 0.9     | 1.8     | 3.7     | 467                        | O                           | H-1629a                         | FC:PI                |
| 1635a                     | <i>Peltaria alliacea</i> Jacq.                                                                             | Yes            | Brassicaceae <sup>j</sup> | E                         | 14°             | 2                | - <sup>q</sup>               | 303                    | 0.3     | 0.6     | 1.2     | 599                        | O                           | L                               | FC:PI                |
| 1636a                     | <i>Peltaria emarginata</i><br>(Boiss.) Hausskn.                                                            | Yes            | Brassicaceae <sup>j</sup> | E                         | 14              | 2                | B                            | 939                    | 1.0     | 1.9     | 3.8     | 599                        | O                           | L                               | FC:PI                |
| 1636b                     | <i>Peltaria emarginata</i><br>Hausskn. <sup>i</sup>                                                        | Yes            | Brassicaceae <sup>j</sup> | E                         | 14              | 2                | B                            | 998                    | 1.0     | 2.0     | 4.1     | 540                        | O                           | <i>Raphanus</i> <sup>c</sup>    | FC:PI                |
| 1637a                     | <i>Pereskia grandifolia</i><br>Haw.                                                                        | Yes            | Cactaceae                 | E                         | 22              | 2                | P                            | 958                    | 1.0     | 2.0     | 3.9     | 557                        | O                           | G <sup>c</sup>                  | FC:PI                |
| 1638a                     | <i>Pericallis appendiculata</i><br>(L.f.) B.Nord.                                                          | - <sup>m</sup> | Asteraceae <sup>j</sup>   | E                         | 60°             | 6                | P                            | 533                    | 0.5     | 1.1     | 2.2     | 477                        | O                           | <i>Solan.</i> <sup>c</sup>      | FC:PI                |
| 1639a                     | <i>Pericallis cruenta</i><br>(L'Hér.) Bolle                                                                | - <sup>m</sup> | Asteraceae <sup>j</sup>   | E                         | 60°             | 6                | P                            | 665                    | 0.7     | 1.4     | 2.7     | 477                        | O                           | <i>Solan.</i> <sup>c</sup>      | FC:PI                |
| 1640a                     | <i>Pericallis echinata</i> (L.f.)<br>B.Nord.                                                               | - <sup>m</sup> | Asteraceae <sup>j</sup>   | E                         | 60°             | 6                | P                            | 714                    | 0.7     | 1.5     | 2.9     | 477                        | O                           | <i>Solan.</i> <sup>c</sup>      | FC:PI                |
| 1641a                     | <i>Pericallis lanata</i> (L'Hér.)<br>B.Nord.                                                               | - <sup>m</sup> | Asteraceae <sup>j</sup>   | E                         | 60°             | 6                | P                            | 562                    | 0.6     | 1.2     | 2.3     | 477                        | O                           | <i>Solan.</i> <sup>c</sup>      | FC:PI                |
| 1642a                     | <i>Pericallis multiflora</i><br>(L'Hér.) B.Nord.                                                           | - <sup>m</sup> | Asteraceae <sup>j</sup>   | E                         | 60°             | 6                | P                            | 577                    | 0.6     | 1.2     | 2.4     | 552                        | O                           | <i>Solan.</i> <sup>c</sup>      | FC:PI                |
| 1643a                     | <i>Pericallis papyracea</i><br>(DC.) B.Nord.                                                               | - <sup>m</sup> | Asteraceae <sup>j</sup>   | E                         | 60°             | 6                | P                            | 587                    | 0.6     | 1.2     | 2.4     | 477                        | O                           | <i>Solan.</i> <sup>c</sup>      | FC:PI                |
| 1643b                     | <i>Pericallis papyracea</i><br>(DC.) B.Nord. subsp.<br><i>hillebrandtii</i> (Christ)<br>Hohenester & Welss | - <sup>m</sup> | Asteraceae <sup>j</sup>   | E                         | - <sup>n</sup>  | (6)              | P                            | 606                    | 0.6     | 1.2     | 2.5     | 552                        | O                           | <i>Solan.</i> <sup>c</sup>      | FC:PI                |
| 1644a                     | <i>Pericallis tussilaginis</i><br>(L'Hér.) D.Don in<br>Sweet                                               | - <sup>m</sup> | Asteraceae <sup>j</sup>   | E                         | 60°             | 6                | P                            | 734                    | 0.8     | 1.5     | 3.0     | 552                        | O                           | <i>Solan.</i> <sup>c</sup>      | FC:PI                |
| 1645a                     | <i>Pericallis webbii</i><br>(Sch. Bip.) Bolle                                                              | - <sup>m</sup> | Asteraceae <sup>j</sup>   | E                         | 60°             | 6                | P                            | 557                    | 0.6     | 1.1     | 2.3     | 477                        | O                           | <i>Solan.</i> <sup>c</sup>      | FC:PI                |



|       |                                                                                                                                          |                |                         |   |                |                |   |       |     |      |      |                   |   |                             |       |
|-------|------------------------------------------------------------------------------------------------------------------------------------------|----------------|-------------------------|---|----------------|----------------|---|-------|-----|------|------|-------------------|---|-----------------------------|-------|
| 1646a | <i>Periploca laevigata</i> Ait.                                                                                                          | – <sup>m</sup> | Apocynaceae             | E | 22°            | 2              | P | 489   | 0.5 | 1.0  | 2.0  | 477               | O | <i>Solan.</i> <sup>c</sup>  | FC:PI |
| 1647a | <i>Phagnalon umbelliforme</i> DC.                                                                                                        | – <sup>m</sup> | Asteraceae <sup>j</sup> | E | 18°            | 2              | P | 1,071 | 1.1 | 2.2  | 4.4  | 477               | O | <i>Glycine</i> <sup>e</sup> | FC:PI |
| 1648l | <i>Phaseolus vulgaris</i> L.                                                                                                             | Yes            | Fabaceae <sup>j</sup>   | E | – <sup>n</sup> | – <sup>p</sup> | A | 773   | 0.8 | 1.6  | 3.2  | 492               | O | <i>Glycine</i> <sup>e</sup> | FC:PI |
| 1649a | <i>Phelipanche bungeana</i> (G.Beck) Soják <sup>an</sup>                                                                                 | Yes            | Orobanchaceae           | E | 24             | 2              | P | 5,296 | 5.4 | 10.8 | 21.7 | 531 <sup>an</sup> | O | G <sup>c</sup>              | CIA   |
| 1650a | <i>Phelipanche</i> cf. <i>coelestis</i> (Reut.) Soják <sup>an</sup>                                                                      | Yes            | Orobanchaceae           | E | 24             | 2              | P | 4,516 | 4.6 | 9.2  | 18.5 | 531 <sup>an</sup> | O | G <sup>c</sup>              | CIA   |
| 1651a | <i>Phelipanche</i> cf. <i>gratiosa</i> (Webb) Carlón, G. Gómez, M. Laínz, Moreno Mor., Ó. Sánchez & Schneew. <sup>an</sup>               | Yes            | Orobanchaceae           | E | 24             | 2              | P | 4,112 | 4.2 | 8.4  | 16.8 | 531 <sup>an</sup> | O | G <sup>c</sup>              | CIA   |
| 1652a | <i>Phelipanche coelestis</i> (Reut.) Soják <sup>i, an</sup>                                                                              | Yes            | Orobanchaceae           | E | 24             | 2              | P | 4,375 | 4.5 | 8.9  | 17.9 | 531 <sup>an</sup> | O | G <sup>c</sup>              | CIA   |
| 1653a | <i>Phelipanche hirtiflora</i> (Rent.) Soják <sup>i, an</sup>                                                                             | Yes            | Orobanchaceae           | E | 24             | 2              | P | 4,694 | 4.8 | 9.6  | 19.2 | 531 <sup>an</sup> | O | G <sup>c</sup>              | CIA   |
| 1654a | <i>Phelipanche lavandulacea</i> Rchb. <sup>i, an</sup>                                                                                   | Yes            | Orobanchaceae           | E | 24             | 2              | P | 4,367 | 4.5 | 8.9  | 17.9 | 531 <sup>an</sup> | O | G <sup>c</sup>              | CIA   |
| 1655a | <i>Phelipanche mutelii</i> (F.Schultz) Pomel <sup>i, an</sup>                                                                            | Yes            | Orobanchaceae           | E | 24             | 2              | A | 4,101 | 4.2 | 8.4  | 16.8 | 531 <sup>an</sup> | O | G <sup>c</sup>              | CIA   |
| 1655b | <i>Phelipanche mutelii</i> (F.Schultz) Pomel <sup>i, an</sup>                                                                            | Yes            | Orobanchaceae           | E | 24             | 2              | A | 4,779 | 4.9 | 9.8  | 19.5 | 531 <sup>an</sup> | O | G <sup>c</sup>              | CIA   |
| 1656a | <i>Phelipanche nana</i> (F.W.Nðe ex Rchb.fil.) Soják <sup>i, an</sup>                                                                    | Yes            | Orobanchaceae           | E | 24             | 2              | A | 3,356 | 3.4 | 6.9  | 13.7 | 531 <sup>an</sup> | O | G <sup>c</sup>              | CIA   |
| 1657a | <i>Phelipanche olbiensis</i> (Coss.) Carlón, G.Gómez, M.Laínz, Moreno Mor., Ó. Sánchez & Schneew. <sup>an</sup>                          | Yes            | Orobanchaceae           | E | 24             | 2              | P | 3,468 | 3.5 | 7.1  | 14.2 | 531 <sup>an</sup> | O | G <sup>c</sup>              | CIA   |
| 1658a | <i>Phelipanche portoilicitana</i> (A. Pujadas & M.B.Crespo) Carlón, G.Gómez, M.Laínz, Moreno Mor., Ó.Sánchez & Schneew. <sup>i, an</sup> | Yes            | Orobanchaceae           | E | 24             | 2              | P | 4,343 | 4.4 | 8.9  | 17.8 | 531 <sup>an</sup> | O | G <sup>c</sup>              | CIA   |
| 1659a | <i>Phelipanche pulchella</i> (C.A.Mey.) Soják <sup>an</sup>                                                                              | Yes            | Orobanchaceae           | E | 24             | 2              | A | 4,175 | 4.3 | 8.5  | 17.1 | 531 <sup>an</sup> | O | G <sup>c</sup>              | CIA   |
| 1660a | <i>Phelipanche purpurea</i> (Jacq.) Soják <sup>an</sup>                                                                                  | Yes            | Orobanchaceae           | E | 24             | 2              | P | 4,323 | 4.4 | 8.8  | 17.7 | 531 <sup>an</sup> | O | G <sup>c</sup>              | CIA   |
| 1661a | <i>Phelipanche ramosa</i> (L.) Pomel <sup>i, an</sup>                                                                                    | Yes            | Orobanchaceae           | E | 24             | 2              | A | 4,607 | 4.7 | 9.4  | 18.8 | 531 <sup>an</sup> | O | G <sup>c</sup>              | CIA   |
| 1662a | <i>Phelipanche tunetana</i> (G.Beck) Soják <sup>i, an</sup>                                                                              | Yes            | Orobanchaceae           | E | 24             | 2              | P | 3,911 | 4.0 | 8.0  | 16.0 | 531 <sup>an</sup> | O | G <sup>c</sup>              | CIA   |
| 1663a | <i>Phelypaea coccinea</i> Poir. <sup>i</sup>                                                                                             | Yes            | Orobanchaceae           | E | 38             | 2              | P | 2,372 | 2.4 | 4.9  | 9.7  | 531               | O | G <sup>c</sup>              | CIA   |
| 1664a | <i>Phelypaea tournefortii</i> Desf.                                                                                                      | Yes            | Orobanchaceae           | E | 38             | 2              | P | 5,144 | 5.3 | 10.5 | 21.0 | 531               | O | G <sup>c</sup>              | CIA   |
| 1665a | <i>Phleum commutatum</i> Gaud. <sup>i</sup>                                                                                              | No             | Poaceae <sup>j</sup>    | M | 14             | 2              | P | 1,334 | 1.4 | 2.7  | 5.5  | 542               | O | H <sup>c</sup>              | FC:PI |
| 1665b | <i>Phelypaea coccinea</i> Poir. <sup>i</sup>                                                                                             | Yes            | Orobanchaceae           | E | 38             | 2              | P | 2,860 | 2.9 | 5.8  | 11.7 | 531               | O | G <sup>c</sup>              | CIA   |
| 1666a | <i>Phleum commutatum</i> Gaud.                                                                                                           | No             | Poaceae <sup>j</sup>    | M | 28             | 4              | P | 3,030 | 3.1 | 6.2  | 12.4 | 542               | O | <i>Phleum</i> <sup>c</sup>  | FC:PI |

Continued

| Entry number <sup>e</sup> | Species                                                    | Voucher        | Family                    | Higher group <sup>f</sup> | 2n <sup>‡</sup> | Ploidy level (x) | Life cycle type <sup>g</sup> | DNA amount             |         |         |         | Original ref. <sup>3</sup> | Present amount <sup>†</sup> | Standard species <sup>*b1</sup>  | Method <sup>††</sup> |
|---------------------------|------------------------------------------------------------|----------------|---------------------------|---------------------------|-----------------|------------------|------------------------------|------------------------|---------|---------|---------|----------------------------|-----------------------------|----------------------------------|----------------------|
|                           |                                                            |                |                           |                           |                 |                  |                              | 1C (Mbp <sup>s</sup> ) | 1C (pg) | 2C (pg) | 4C (pg) |                            |                             |                                  |                      |
| 1667a                     | <i>Phleum rhaeticum</i> (Humphries) Rauschert <sup>h</sup> | No             | Poaceae <sup>j</sup>      | M                         | 14              | 2                | P                            | 1,177                  | 1.2     | 2.4     | 4.8     | 542                        | O                           | H <sup>c</sup>                   | FC:PI                |
| 1667b                     | <i>Phleum rhaeticum</i> (Humphries) Rauschert <sup>h</sup> | No             | Poaceae <sup>j</sup>      | M                         | 14              | 2                | P                            | 1,431                  | 1.5     | 2.9     | 5.9     | 542                        | O                           | H <sup>c</sup>                   | FC:PI                |
| 1668a                     | <i>Phoenix canariensis</i> Chabaud                         | — <sup>m</sup> | Arecaceae <sup>j</sup>    | M                         | 36 <sup>o</sup> | 2                | P                            | 880                    | 0.9     | 1.8     | 3.6     | 552                        | O                           | <i>Glycine</i> <sup>e</sup>      | FC:PI                |
| 1669a                     | <i>Phyllis nobla</i> L.                                    | — <sup>m</sup> | Rubiaceae                 | E                         | 22 <sup>o</sup> | 2                | P                            | 362                    | 0.4     | 0.7     | 1.5     | 552                        | O                           | <i>Raphanus</i> <sup>e</sup>     | FC:PI                |
| 1670a                     | <i>Phyllota phyllicoides</i> (Sieber ex D.C.) Benth.       | — <sup>m</sup> | Fabaceae <sup>j</sup>     | E                         | — <sup>n</sup>  | — <sup>p</sup>   | — <sup>q</sup>               | 914                    | 0.9     | 1.9     | 3.7     | 526                        | O                           | A                                | FC:PI                |
| 1671a                     | <i>Physaria arctica</i> (Wormsk. ex Hornem) S.Watson       | Yes            | Brassicaceae <sup>j</sup> | E                         | 16              | — <sup>p</sup>   | — <sup>q</sup>               | 675                    | 0.7     | 1.4     | 2.8     | 599                        | O                           | L                                | FC:PI                |
| 1672a                     | <i>Physaria bellii</i> G.A.Mulligan                        | Yes            | Brassicaceae <sup>j</sup> | E                         | 8               | — <sup>p</sup>   | — <sup>q</sup>               | 2,289                  | 2.3     | 4.7     | 9.4     | 599                        | O                           | L                                | FC:PI                |
| 1673a                     | <i>Physaria didymocarpa</i> (Hook.) A.Gray                 | Yes            | Brassicaceae <sup>j</sup> | E                         | 56              | — <sup>p</sup>   | — <sup>q</sup>               | 2,181                  | 2.2     | 4.5     | 8.9     | 599                        | O                           | L                                | FC:PI                |
| 1674a                     | <i>Physaria gracilis</i> (Hook.) O'Kane & Al-Shehbaz       | Yes            | Brassicaceae <sup>j</sup> | E                         | 12              | — <sup>p</sup>   | — <sup>q</sup>               | 254                    | 0.3     | 0.5     | 1.0     | 599                        | O                           | L                                | FC:PI                |
| 1675a                     | <i>Physaria ovalifolia</i> (Rydb.) O'Kane & Al-Shehbaz     | Yes            | Brassicaceae <sup>j</sup> | E                         | 12              | — <sup>p</sup>   | — <sup>q</sup>               | 421                    | 0.4     | 0.9     | 1.7     | 599                        | O                           | L                                | FC:PI                |
| 1676b                     | <i>Physocarpus opulifolius</i> (L.) Maxim.                 | No             | Rosaceae                  | E                         | — <sup>n</sup>  | — <sup>p</sup>   | P                            | 347                    | 0.4     | 0.7     | 1.4     | 492                        | O                           | <i>Raphanus</i> <sup>e</sup>     | FC:PI                |
| 1677a                     | <i>Physorhynchus chamaerapistrum</i> (Boiss.) Boiss.       | No             | Brassicaceae <sup>j</sup> | E                         | 32              | 2                | A                            | 1,213                  | 1.2     | 2.5     | 5.0     | 602                        | O                           | <i>Solan.</i> <sup>c</sup>       | FC:PI                |
| 1678a                     | <i>Picrorhiza kurroo</i> Royle                             | Yes            | Plantaginaceae            | E                         | 34 <sup>o</sup> | 4                | P                            | 1,712                  | 1.8     | 3.5     | 7.0     | 478                        | O                           | <i>Petroselinum</i> <sup>e</sup> | FC:PI                |
| 1679a                     | <i>Pilosocereus royenii</i> (L.) Byles & G.D.Rowley        | Yes            | Cactaceae                 | E                         | — <sup>n</sup>  | 6                | P                            | 3,183                  | 3.3     | 6.5     | 13.0    | 557                        | O                           | G <sup>c</sup>                   | FC:PI                |
| 1680a                     | <i>Pimelea linifolia</i> <sup>l</sup>                      | — <sup>m</sup> | Thymelaeaceae             | E                         | — <sup>n</sup>  | — <sup>p</sup>   | — <sup>q</sup>               | 3,648                  | 3.7     | 7.5     | 14.9    | 526                        | O                           | A                                | FC:PI                |
| 1681a                     | <i>Pimpinella cumbrae</i> Link                             | — <sup>m</sup> | Apiaceae <sup>j</sup>     | E                         | 20 <sup>o</sup> | 2                | P                            | 2,249                  | 2.3     | 4.6     | 9.2     | 477                        | O                           | H <sup>c</sup>                   | FC:PI                |
| 1682a                     | <i>Pinguicula agnata</i> Casper                            | Yes            | Lentibulariaceae          | E                         | 22              | — <sup>p</sup>   | P                            | 744                    | 0.8     | 1.5     | 3.0     | 535                        | O                           | G <sup>c</sup>                   | CIA                  |
| 1683a                     | <i>Pinguicula cyclosecta</i> Casper                        | Yes            | Lentibulariaceae          | E                         | 22              | — <sup>p</sup>   | P                            | 520                    | 0.5     | 1.1     | 2.1     | 535                        | O                           | G <sup>c</sup>                   | CIA                  |
| 1684a                     | <i>Pinguicula ehlersiae</i> Speta & F.Fuchs                | Yes            | Lentibulariaceae          | E                         | — <sup>n</sup>  | — <sup>p</sup>   | P                            | 487                    | 0.5     | 1.0     | 2.0     | 535                        | O                           | G <sup>c</sup>                   | CIA                  |
| 1685a                     | <i>Pinguicula emarginata</i> Zamudio & Rzed.               | Yes            | Lentibulariaceae          | E                         | 22              | — <sup>p</sup>   | P                            | 791                    | 0.8     | 1.6     | 3.2     | 535                        | O                           | G <sup>c</sup>                   | CIA                  |
| 1686a                     | <i>Pinguicula esseriana</i> B.Kirchner                     | Yes            | Lentibulariaceae          | E                         | 32              | — <sup>p</sup>   | P                            | 829                    | 0.8     | 1.7     | 3.4     | 535                        | O                           | G <sup>c</sup>                   | CIA                  |
| 1687a                     | <i>Pinguicula gracilis</i> Zamudio                         | Yes            | Lentibulariaceae          | E                         | — <sup>n</sup>  | — <sup>p</sup>   | P                            | 600                    | 0.6     | 1.2     | 2.5     | 535                        | O                           | G <sup>c</sup>                   | CIA                  |
| 1688a                     | <i>Pinguicula gypsicola</i> Brandegee                      | Yes            | Lentibulariaceae          | E                         | 22              | — <sup>p</sup>   | P                            | 548                    | 0.6     | 1.1     | 2.2     | 535                        | O                           | G <sup>c</sup>                   | CIA                  |
| 1689a                     | <i>Pinguicula heterophylla</i> Benth.                      | Yes            | Lentibulariaceae          | E                         | 22              | — <sup>p</sup>   | P                            | 513                    | 0.5     | 1.1     | 2.1     | 535                        | O                           | G <sup>c</sup>                   | CIA                  |

|       |                                                                  |     |                       |   |                |                |   |       |     |     |      |     |   |                              |       |
|-------|------------------------------------------------------------------|-----|-----------------------|---|----------------|----------------|---|-------|-----|-----|------|-----|---|------------------------------|-------|
| 1690a | <i>Pinguicula macrophylla</i><br>Kunth                           | Yes | Lentibulariaceae      | E | 22             | – <sup>P</sup> | P | 693   | 0.7 | 1.4 | 2.8  | 535 | O | G <sup>c</sup>               | CIA   |
| 1691a | <i>Pistacia therebinthus</i> L.                                  | Yes | Anacardiaceae         | E | – <sup>n</sup> | – <sup>P</sup> | P | 660   | 0.7 | 1.4 | 2.7  | 489 | O | – <sup>w</sup>               | FC:EB |
| 1692p | <i>Pisum sativum</i> L.                                          | Yes | Fabaceae <sup>j</sup> | E | – <sup>n</sup> | – <sup>P</sup> | A | 4,435 | 4.5 | 9.1 | 18.1 | 492 | O | G <sup>c</sup>               | FC:PI |
| 1693a | <i>Pitcairnia andreana</i><br>Linden                             | Yes | Bromeliaceae          | M | – <sup>n</sup> | – <sup>P</sup> | P | 636   | 0.7 | 1.3 | 2.6  | 575 | O | <i>Raphanus</i> <sup>e</sup> | FC:PI |
| 1694a | <i>Pitcairnia angustifolia</i><br>Aiton <sup>i</sup>             | Yes | Bromeliaceae          | M | – <sup>n</sup> | – <sup>P</sup> | P | 518   | 0.5 | 1.1 | 2.1  | 575 | O | <i>Glycine</i> <sup>e</sup>  | FC:PI |
| 1695a | <i>Pitcairnia</i><br><i>aphelandriflora</i> Lem.                 | Yes | Bromeliaceae          | M | – <sup>n</sup> | – <sup>P</sup> | P | 606   | 0.6 | 1.2 | 2.5  | 575 | O | <i>Raphanus</i> <sup>e</sup> | FC:PI |
| 1696a | <i>Pitcairnia atrorubens</i><br>(Beer) Baker                     | Yes | Bromeliaceae          | M | – <sup>n</sup> | – <sup>P</sup> | P | 587   | 0.6 | 1.2 | 2.4  | 575 | O | <i>Raphanus</i> <sup>e</sup> | FC:PI |
| 1697a | <i>Pitcairnia aureobrunnea</i><br>Rauh                           | Yes | Bromeliaceae          | M | – <sup>n</sup> | – <sup>P</sup> | P | 548   | 0.6 | 1.1 | 2.2  | 575 | O | <i>Glycine</i> <sup>e</sup>  | FC:PI |
| 1698a | <i>Pitcairnia cardenasii</i><br>L.B.Sm.                          | Yes | Bromeliaceae          | M | – <sup>n</sup> | – <sup>P</sup> | P | 499   | 0.5 | 1.0 | 2.0  | 575 | O | <i>Glycine</i> <sup>e</sup>  | FC:PI |
| 1699a | <i>Pitcairnia chiapensis</i><br>Miranda                          | Yes | Bromeliaceae          | M | – <sup>n</sup> | – <sup>P</sup> | P | 597   | 0.6 | 1.2 | 2.4  | 575 | O | <i>Raphanus</i> <sup>e</sup> | FC:PI |
| 1700a | <i>Pitcairnia feliciana</i><br>(A.Chev.) Harms &<br>Mildbr.      | Yes | Bromeliaceae          | M | 50             | 2              | P | 293   | 0.3 | 0.6 | 1.2  | 575 | O | <i>Raphanus</i> <sup>e</sup> | FC:PI |
| 1701a | <i>Pitcairnia flammea</i> Lindl.<br>var. <i>glabrior</i> L.B.Sm. | Yes | Bromeliaceae          | M | – <sup>n</sup> | – <sup>P</sup> | P | 626   | 0.6 | 1.3 | 2.6  | 575 | O | <i>Raphanus</i> <sup>e</sup> | FC:PI |
| 1702a | <i>Pitcairnia grafii</i> Rauh                                    | Yes | Bromeliaceae          | M | – <sup>n</sup> | – <sup>P</sup> | P | 655   | 0.7 | 1.3 | 2.7  | 575 | O | <i>Raphanus</i> <sup>e</sup> | FC:PI |
| 1703a | <i>Pitcairnia halophila</i><br>L.B.Sm.                           | Yes | Bromeliaceae          | M | – <sup>n</sup> | – <sup>P</sup> | P | 528   | 0.5 | 1.1 | 2.2  | 575 | O | <i>Glycine</i> <sup>e</sup>  | FC:PI |
| 1704a | <i>Pitcairnia heerdeae</i><br>E.Gross & Rauh                     | Yes | Bromeliaceae          | M | – <sup>n</sup> | – <sup>P</sup> | P | 577   | 0.6 | 1.2 | 2.4  | 575 | O | <i>Raphanus</i> <sup>e</sup> | FC:PI |
| 1705a | <i>Pitcairnia heterophylla</i><br>(Lindl.) Beer                  | Yes | Bromeliaceae          | M | – <sup>n</sup> | – <sup>P</sup> | P | 430   | 0.4 | 0.9 | 1.8  | 575 | O | <i>Raphanus</i> <sup>e</sup> | FC:PI |
| 1706a | <i>Pitcairnia hitchcockiana</i><br>L.B.Sm.                       | Yes | Bromeliaceae          | M | – <sup>n</sup> | – <sup>P</sup> | P | 626   | 0.6 | 1.3 | 2.6  | 575 | O | <i>Raphanus</i> <sup>e</sup> | FC:PI |
| 1707a | <i>Pitcairnia macrochlamys</i><br>Mez                            | Yes | Bromeliaceae          | M | – <sup>n</sup> | – <sup>P</sup> | P | 587   | 0.6 | 1.2 | 2.4  | 575 | O | <i>Raphanus</i> <sup>e</sup> | FC:PI |
| 1708a | <i>Pitcairnia micotrinensis</i><br>Read                          | Yes | Bromeliaceae          | M | – <sup>n</sup> | – <sup>P</sup> | P | 538   | 0.6 | 1.1 | 2.2  | 575 | O | <i>Glycine</i> <sup>e</sup>  | FC:PI |
| 1709a | <i>Pitcairnia palmoides</i><br>Mez & Sodiro                      | Yes | Bromeliaceae          | M | – <sup>n</sup> | – <sup>P</sup> | P | 577   | 0.6 | 1.2 | 2.4  | 575 | O | <i>Raphanus</i> <sup>e</sup> | FC:PI |
| 1710a | <i>Pitcairnia paraguayensis</i><br>L.B.Sm.                       | Yes | Bromeliaceae          | M | – <sup>n</sup> | – <sup>P</sup> | P | 665   | 0.7 | 1.4 | 2.7  | 575 | O | <i>Raphanus</i> <sup>e</sup> | FC:PI |
| 1711a | <i>Pitcairnia piepenbringii</i><br>Rauh & E.Gross                | Yes | Bromeliaceae          | M | – <sup>n</sup> | – <sup>P</sup> | P | 587   | 0.6 | 1.2 | 2.4  | 575 | O | <i>Raphanus</i> <sup>e</sup> | FC:PI |
| 1712a | <i>Pitcairnia poeppigiana</i><br>Mez                             | Yes | Bromeliaceae          | M | – <sup>n</sup> | – <sup>P</sup> | P | 587   | 0.6 | 1.2 | 2.4  | 575 | O | <i>Raphanus</i> <sup>e</sup> | FC:PI |
| 1713a | <i>Pitcairnia pomacochae</i><br>Rauh                             | Yes | Bromeliaceae          | M | – <sup>n</sup> | – <sup>P</sup> | P | 606   | 0.6 | 1.2 | 2.5  | 575 | O | <i>Raphanus</i> <sup>e</sup> | FC:PI |
| 1714a | <i>Pitcairnia prolifera</i> Rauh                                 | Yes | Bromeliaceae          | M | – <sup>n</sup> | – <sup>P</sup> | P | 411   | 0.4 | 0.8 | 1.7  | 575 | O | <i>Raphanus</i> <sup>e</sup> | FC:PI |
| 1715a | <i>Pitcairnia rectiflora</i> Rauh                                | Yes | Bromeliaceae          | M | – <sup>n</sup> | – <sup>P</sup> | P | 587   | 0.6 | 1.2 | 2.4  | 575 | O | <i>Raphanus</i> <sup>e</sup> | FC:PI |
| 1716a | <i>Pitcairnia riparia</i> Mez                                    | Yes | Bromeliaceae          | M | – <sup>n</sup> | – <sup>P</sup> | P | 557   | 0.6 | 1.1 | 2.3  | 575 | O | <i>Glycine</i> <sup>e</sup>  | FC:PI |
| 1717a | <i>Pitcairnia sceptrigera</i><br>Mez                             | Yes | Bromeliaceae          | M | – <sup>n</sup> | – <sup>P</sup> | P | 587   | 0.6 | 1.2 | 2.4  | 575 | O | <i>Raphanus</i> <sup>e</sup> | FC:PI |
| 1718a | <i>Pitcairnia schultzei</i><br>Harms                             | Yes | Bromeliaceae          | M | – <sup>n</sup> | – <sup>P</sup> | P | 645   | 0.7 | 1.3 | 2.6  | 575 | O | <i>Raphanus</i> <sup>e</sup> | FC:PI |
| 1719a | <i>Pitcairnia spicata</i> (Lam.)<br>Mez                          | Yes | Bromeliaceae          | M | – <sup>n</sup> | – <sup>P</sup> | P | 597   | 0.6 | 1.2 | 2.4  | 575 | O | <i>Raphanus</i> <sup>e</sup> | FC:PI |

Continued

| Entry number <sup>e</sup> | Species                                                                             | Voucher        | Family               | Higher group <sup>f</sup> | 2n <sup>‡</sup>      | Ploidy level (x) | Life cycle type <sup>g</sup> | DNA amount             |         |         |         | Original ref. <sup>h</sup> | Present amount <sup>†</sup> | Standard species <sup>*b1</sup> | Method <sup>††</sup> |
|---------------------------|-------------------------------------------------------------------------------------|----------------|----------------------|---------------------------|----------------------|------------------|------------------------------|------------------------|---------|---------|---------|----------------------------|-----------------------------|---------------------------------|----------------------|
|                           |                                                                                     |                |                      |                           |                      |                  |                              | 1C (Mbp <sup>s</sup> ) | 1C (pg) | 2C (pg) | 4C (pg) |                            |                             |                                 |                      |
| 1720a                     | <i>Pitcairnia tabuliformis</i> Linden                                               | Yes            | Bromeliaceae         | M                         | – <sup>n</sup>       | – <sup>p</sup>   | P                            | 538                    | 0.6     | 1.1     | 2.2     | 575                        | O                           | <i>Glycine</i> <sup>e</sup>     | FC:PI                |
| 1721a                     | <i>Pitcairnia venezuelana</i> L.B.Sm. & Steyerl.                                    | Yes            | Bromeliaceae         | M                         | – <sup>n</sup>       | – <sup>p</sup>   | P                            | 665                    | 0.7     | 1.4     | 2.7     | 575                        | O                           | <i>Raphanus</i> <sup>e</sup>    | FC:PI                |
| 1722a                     | <i>Pitcairnia villetaensis</i> Rauh                                                 | Yes            | Bromeliaceae         | M                         | – <sup>n</sup>       | – <sup>p</sup>   | P                            | 616                    | 0.6     | 1.3     | 2.5     | 575                        | O                           | <i>Raphanus</i> <sup>e</sup>    | FC:PI                |
| 1723a                     | <i>Pitcairnia yaupibajaensis</i> Rauh                                               | Yes            | Bromeliaceae         | M                         | – <sup>n</sup>       | – <sup>p</sup>   | P                            | 548                    | 0.6     | 1.1     | 2.2     | 575                        | O                           | <i>Glycine</i> <sup>e</sup>     | FC:PI                |
| 1724a                     | <i>Pittosporum tobira</i> Aiton                                                     | Yes            | Pittosporaceae       | E                         | – <sup>n</sup>       | – <sup>p</sup>   | P                            | 592                    | 0.6     | 1.2     | 2.4     | 489                        | O                           | – <sup>w</sup>                  | FC:EB                |
| 1725a                     | <i>Plantago arborescens</i> Poir. subsp. <i>arborescens</i> var. <i>arborescens</i> | – <sup>m</sup> | Plantaginaceae       | E                         | 12 <sup>o</sup>      | 2                | P                            | 474                    | 0.5     | 1.0     | 1.9     | 477                        | O                           | <i>Solan.</i> <sup>c</sup>      | FC:PI                |
| 1726a                     | <i>Plantago famarae</i> Svent.                                                      | – <sup>m</sup> | Plantaginaceae       | E                         | 12 <sup>o</sup>      | 2                | P                            | 489                    | 0.5     | 1.0     | 2.0     | 477                        | O                           | <i>Solan.</i> <sup>c</sup>      | FC:PI                |
| 1727a                     | <i>Plantago webbii</i> Barn.                                                        | – <sup>m</sup> | Plantaginaceae       | E                         | 12                   | 2                | P                            | 543                    | 0.6     | 1.1     | 2.2     | 477                        | O                           | <i>Solan.</i> <sup>c</sup>      | FC:PI                |
| 1728a                     | <i>Platanus hispanica</i> Miller ex Münchh.                                         | Yes            | Platanaceae          | E                         | – <sup>n</sup>       | – <sup>p</sup>   | P                            | 1,878                  | 1.9     | 3.8     | 7.7     | 489                        | O                           | – <sup>w</sup>                  | FC:EB                |
| 1729b                     | <i>Plocama pendula</i> Ait.                                                         | – <sup>m</sup> | Rubiaceae            | E                         | 44 <sup>o</sup>      | 4                | P                            | 1,364                  | 1.4     | 2.8     | 5.6     | 477                        | O                           | <i>Glycine</i> <sup>e</sup>     | FC:PI                |
| 1730a                     | <i>Poa acicularifolia</i> Buchanan subsp. <i>acicularifolia</i>                     | Yes            | Poaceae <sup>j</sup> | M                         | 28                   | 4                | P                            | 2,616                  | 2.7     | 5.4     | 10.7    | 528                        | O                           | – <sup>w</sup>                  | FC:PI                |
| 1730b                     | <i>Poa acicularifolia</i> Edgar subsp. <i>ophitalis</i>                             | Yes            | Poaceae <sup>j</sup> | M                         | 28                   | 4                | P                            | 3,007                  | 3.1     | 6.2     | 12.3    | 528                        | O                           | – <sup>w</sup>                  | FC:PI                |
| 1731a                     | <i>Poa</i> aff. <i>cita</i> <sup>1</sup>                                            | Yes            | Poaceae <sup>j</sup> | M                         | 112                  | 16               | P                            | 8,528                  | 8.7     | 17.4    | 34.9    | 528                        | O                           | – <sup>w</sup>                  | FC:PI                |
| 1732a                     | <i>Poa</i> aff. <i>colensoi</i> <sup>1</sup>                                        | Yes            | Poaceae <sup>j</sup> | M                         | 28                   | 4                | P                            | 2,958                  | 3.0     | 6.1     | 12.1    | 528                        | O                           | – <sup>w</sup>                  | FC:PI                |
| 1733a                     | <i>Poa anceps</i> G.Forst subsp. <i>polyphylla</i> (Hack.) Edgar                    | Yes            | Poaceae <sup>j</sup> | M                         | 28                   | 4                | P                            | 2,665                  | 2.7     | 5.5     | 10.9    | 528                        | O                           | – <sup>w</sup>                  | FC:PI                |
| 1733b                     | <i>Poa anceps</i> G.Forst subsp. <i>anceps</i> <sup>1</sup>                         | Yes            | Poaceae <sup>j</sup> | M                         | 28                   | 4                | P                            | 2,939                  | 3.0     | 6.0     | 12.0    | 528                        | O                           | – <sup>w</sup>                  | FC:PI                |
| 1734a                     | <i>Poa astonii</i> Petrie                                                           | Yes            | Poaceae <sup>j</sup> | M                         | 28                   | 4                | P                            | 2,924                  | 3.0     | 6.0     | 12.0    | 528                        | O                           | – <sup>w</sup>                  | FC:PI                |
| 1735a                     | <i>Poa breviglumis</i> Hook.f. <sup>1</sup>                                         | Yes            | Poaceae <sup>j</sup> | M                         | 28                   | 4                | P                            | 2,225                  | 2.3     | 4.6     | 9.1     | 528                        | O                           | – <sup>w</sup>                  | FC:PI                |
| 1736a                     | <i>Poa b Buchananii</i> Zotov                                                       | Yes            | Poaceae <sup>j</sup> | M                         | 28                   | 4                | P                            | 2,768                  | 2.8     | 5.7     | 11.3    | 528                        | O                           | – <sup>w</sup>                  | FC:PI                |
| 1737a                     | <i>Poa chathamica</i> Petrie <sup>1</sup>                                           | Yes            | Poaceae <sup>j</sup> | M                         | 112                  | 16               | P                            | 10,416                 | 10.7    | 21.3    | 42.6    | 528                        | O                           | – <sup>w</sup>                  | FC:PI                |
| 1738a                     | <i>Poa cita</i> Edgar <sup>1</sup>                                                  | Yes            | Poaceae <sup>j</sup> | M                         | 84                   | 12               | P                            | 7,330                  | 7.5     | 15.0    | 30.0    | 528                        | O                           | – <sup>w</sup>                  | FC:PI                |
| 1739a                     | <i>Poa colensoi</i> Hook.f. <sup>1</sup>                                            | Yes            | Poaceae <sup>j</sup> | M                         | 28                   | 4                | P                            | 2,763                  | 2.8     | 5.7     | 11.3    | 528                        | O                           | – <sup>w</sup>                  | FC:PI                |
| 1739b                     | <i>Poa colensoi</i> Hook.f. <sup>1</sup>                                            | Yes            | Poaceae <sup>j</sup> | M                         | 28                   | 4                | P                            | 1,271                  | 1.3     | 2.6     | 5.2     | 476                        | O                           | <i>Actinidia</i> <sup>c</sup>   | FC:PI                |
| 1739c                     | <i>Poa colensoi</i> Hook.f. <sup>1</sup>                                            | Yes            | Poaceae <sup>j</sup> | M                         | 28                   | 4                | P                            | 1,663                  | 1.7     | 3.4     | 6.8     | 476                        | O                           | <i>Actinidia</i> <sup>c</sup>   | FC:PI                |
| 1740a                     | <i>Poa dipsacea</i> Petrie                                                          | Yes            | Poaceae <sup>j</sup> | M                         | 28 <sup>o</sup>      | 4                | P                            | 2,734                  | 2.8     | 5.6     | 11.2    | 528                        | O                           | – <sup>w</sup>                  | FC:PI                |
| 1741a                     | <i>Poa foliosa</i> (Hook.f.) Hook.f.                                                | Yes            | Poaceae <sup>j</sup> | M                         | 28                   | 4                | P                            | 2,929                  | 3.0     | 6.0     | 12.0    | 528                        | O                           | – <sup>w</sup>                  | FC:PI                |
| 1742a                     | <i>Poa imbecilla</i> Spreng.                                                        | Yes            | Poaceae <sup>j</sup> | M                         | 28                   | 4                | P                            | 2,083                  | 2.1     | 4.3     | 8.5     | 528                        | O                           | – <sup>w</sup>                  | FC:PI                |
| 1743a                     | <i>Poa incrassata</i> Petrie                                                        | Yes            | Poaceae <sup>j</sup> | M                         | 28                   | 4                | P                            | 2,738                  | 2.8     | 5.6     | 11.2    | 528                        | O                           | – <sup>w</sup>                  | FC:PI                |
| 1744a                     | <i>Poa intrusa</i> Edgar                                                            | Yes            | Poaceae <sup>j</sup> | M                         | 28                   | 4                | P                            | 2,939                  | 3.0     | 6.0     | 12.0    | 528                        | O                           | – <sup>w</sup>                  | FC:PI                |
| 1745a                     | <i>Poa kirkii</i> Buchanan                                                          | Yes            | Poaceae <sup>j</sup> | M                         | 28                   | 4                | P                            | 2,391                  | 2.4     | 4.9     | 9.8     | 528                        | O                           | – <sup>w</sup>                  | FC:PI                |
| 1746a                     | <i>Poa lindsayi</i> Hook.f. <sup>1</sup>                                            | Yes            | Poaceae <sup>j</sup> | M                         | 28                   | 4                | P                            | 2,205                  | 2.3     | 4.5     | 9.0     | 528                        | O                           | – <sup>w</sup>                  | FC:PI                |
| 1746b                     | <i>Poa lindsayi</i> Hook.f. <sup>1</sup>                                            | Yes            | Poaceae <sup>j</sup> | M                         | 28                   | 4                | P                            | 2,230                  | 2.3     | 4.6     | 9.1     | 528                        | O                           | – <sup>w</sup>                  | FC:PI                |
| 1747a                     | <i>Poa litorosa</i> Cheeseman <sup>1</sup>                                          | Yes            | Poaceae <sup>j</sup> | M                         | 263–266 <sup>o</sup> | 38               | P                            | 15,922                 | 16.3    | 32.6    | 65.1    | 528                        | O                           | – <sup>w</sup>                  | FC:PI                |
| 1748a                     | <i>Poa maniototo</i> Petrie                                                         | Yes            | Poaceae <sup>j</sup> | M                         | 28                   | 4                | P                            | 2,685                  | 2.7     | 5.5     | 11.0    | 528                        | O                           | – <sup>w</sup>                  | FC:PI                |
| 1749a                     | <i>Poa matthewsii</i> Petrie                                                        | Yes            | Poaceae <sup>j</sup> | M                         | 28                   | 4                | P                            | 2,685                  | 2.7     | 5.5     | 11.0    | 528                        | O                           | – <sup>w</sup>                  | FC:PI                |

|       |                                                                 |                |                               |   |                 |                |                |        |      |      |      |                   |   |                        |       |
|-------|-----------------------------------------------------------------|----------------|-------------------------------|---|-----------------|----------------|----------------|--------|------|------|------|-------------------|---|------------------------|-------|
| 1750a | <i>Poa novae-zelandiae</i><br>Hack. <sup>i</sup>                | Yes            | Poaceae <sup>j</sup>          | M | 28              | 4              | P              | 3,090  | 3-2  | 6-3  | 12-6 | 528               | O | – <sup>w</sup>         | FC:PI |
| 1751a | <i>Poa pusilla</i> Berggr.                                      | Yes            | Poaceae <sup>j</sup>          | M | 28              | 4              | P              | 2,690  | 2-8  | 5-5  | 11-0 | 528               | O | – <sup>w</sup>         | FC:PI |
| 1752a | <i>Poa ramosissima</i> Hook.f.                                  | Yes            | Poaceae <sup>j</sup>          | M | 28              | 4              | P              | 2,782  | 2-8  | 5-7  | 11-4 | 528               | O | – <sup>w</sup>         | FC:PI |
| 1753a | <i>Poa schistacea</i> Edgar &<br>Connor                         | Yes            | Poaceae <sup>j</sup>          | M | 28              | 4              | P              | 5,389  | 5-5  | 11-0 | 22-0 | 528               | O | – <sup>w</sup>         | FC:PI |
| 1754a | <i>Poa spania</i> Edgar &<br>Molloy                             | Yes            | Poaceae <sup>j</sup>          | M | 28              | 4              | P              | 2,352  | 2-4  | 4-8  | 9-6  | 528               | O | – <sup>w</sup>         | FC:PI |
| 1754b | <i>Poa spania</i> Edgar &<br>Molloy                             | Yes            | Poaceae <sup>j</sup>          | M | 28              | 4              | P              | 1,663  | 1-7  | 3-4  | 6-8  | 476               | O | Actinidia <sup>c</sup> | FC:PI |
| 1755a | <i>Poa sublimis</i> Edgar                                       | Yes            | Poaceae <sup>j</sup>          | M | 28              | 4              | P              | 2,455  | 2-5  | 5-0  | 10-0 | 528               | O | – <sup>w</sup>         | FC:PI |
| 1756a | <i>Poa sudicola</i> Edgar                                       | Yes            | Poaceae <sup>j</sup>          | M | 28              | 4              | P              | 3,174  | 3-2  | 6-5  | 13-0 | 528               | O | – <sup>w</sup>         | FC:PI |
| 1757b | <i>Poa trivialis</i> L.                                         | – <sup>m</sup> | Poaceae <sup>j</sup>          | M | 14 <sup>o</sup> | 2              | P              | 1,625  | 1-7  | 3-3  | 6-6  | 555               | O | G <sup>c</sup>         | FC:PI |
| 1758a | <i>Poa xenica</i> Edgar &<br>Connor                             | Yes            | Poaceae <sup>j</sup>          | M | 28              | 4              | P              | 3,262  | 3-3  | 6-7  | 13-3 | 528               | O | – <sup>w</sup>         | FC:PI |
| 1759a | <i>Poellnitzia rubriflora</i><br>Uitew.                         | Yes            | Xanthorrhoeaceae <sup>k</sup> | M | 14 <sup>o</sup> | 2              | P              | 17,115 | 17-5 | 35-0 | 70-0 | 473               | O | Agave sp. <sup>c</sup> | FC:PI |
| 1760a | <i>Polycarpaea aristata</i><br>(Ait.) DC.                       | – <sup>m</sup> | Caryophyllaceae               | E | – <sup>n</sup>  | 2 <sup>z</sup> | P              | 455    | 0-5  | 0-9  | 1-9  | 477               | O | Raphanus <sup>c</sup>  | FC:PI |
| 1761a | <i>Polycarpaea carnosa</i><br>C.Sm. ex Buch                     | – <sup>m</sup> | Caryophyllaceae               | E | 18 <sup>o</sup> | 2              | P              | 411    | 0-4  | 0-8  | 1-7  | 552               | O | Raphanus <sup>c</sup>  | FC:PI |
| 1762a | <i>Polycarpaea latifolia</i><br>Willd.                          | – <sup>m</sup> | Caryophyllaceae               | E | 18 <sup>o</sup> | 2              | P              | 435    | 0-4  | 0-9  | 1-8  | 477               | O | Raphanus <sup>c</sup>  | FC:PI |
| 1763a | <i>Polycarpaea smithii</i> Link                                 | – <sup>m</sup> | Caryophyllaceae               | E | – <sup>n</sup>  | – <sup>p</sup> | P              | 533    | 0-5  | 1-1  | 2-2  | 477               | O | Solan. <sup>c</sup>    | FC:PI |
| 1764a | <i>Polycarpaea tenuis</i> Webb<br>ex Christ                     | – <sup>m</sup> | Caryophyllaceae               | E | 18              | 2              | P              | 445    | 0-5  | 0-9  | 1-8  | 477               | O | Raphanus <sup>c</sup>  | FC:PI |
| 1765a | <i>Polygala angustifolia</i><br>Lange                           | Yes            | Polygalaceae                  | E | – <sup>n</sup>  | – <sup>p</sup> | P              | 416    | 0-4  | 0-9  | 1-7  | 489               | O | – <sup>w</sup>         | FC:EB |
| 1766a | <i>Polygala calcarea</i><br>F.W.Schultz cv. Lillet              | Yes            | Polygalaceae                  | E | c. 30           | – <sup>p</sup> | P              | 421    | 0-4  | 0-9  | 1-7  | 612               | O | J                      | FC:PI |
| 1766b | <i>Polygala calcarea</i><br>F.W.Schultz                         | Yes            | Polygalaceae                  | E | 34 <sup>o</sup> | 2              | P              | 479    | 0-5  | 1-0  | 2-0  | 550               | O | H <sup>c</sup>         | FC:PI |
| 1767a | <i>Polygala microphylla</i> L.                                  | Yes            | Polygalaceae                  | E | – <sup>n</sup>  | – <sup>p</sup> | P              | 513    | 0-5  | 1-1  | 2-1  | 489               | O | – <sup>w</sup>         | FC:EB |
| 1768a | <i>Polygala vayredae</i> Costa                                  | Yes            | Polygalaceae                  | E | 28              | 4              | P              | 1,325  | 1-4  | 2-7  | 5-4  | 550               | O | Solan. <sup>c</sup>    | FC:PI |
| 1769a | <i>Polygala vulgaris</i> L.                                     | Yes            | Polygalaceae                  | E | – <sup>n</sup>  | – <sup>p</sup> | P              | 435    | 0-4  | 0-9  | 1-8  | 489               | O | – <sup>w</sup>         | FC:EB |
| 1770a | <i>Populus alba</i> L.                                          | Yes            | Salicaceae                    | E | – <sup>n</sup>  | – <sup>p</sup> | P              | 509    | 0-5  | 1-0  | 2-1  | 489               | O | – <sup>w</sup>         | FC:EB |
| 1771a | <i>Populus nigra</i> L.                                         | Yes            | Salicaceae                    | E | – <sup>n</sup>  | – <sup>p</sup> | P              | 528    | 0-5  | 1-1  | 2-2  | 489               | O | – <sup>w</sup>         | FC:EB |
| 1772a | <i>Populus trichocarpa</i><br>Torr. & Gray<br>'Nisqually-1'     | No             | Salicaceae                    | E | 38              | – <sup>p</sup> | P              | 484    | 0-5  | 1-0  | 2-0  | 613               | O | – <sup>ax</sup>        | GS    |
| 1773a | <i>Posidonia oceanica</i> (L.)<br>Del.                          | Yes            | Posidoniaceae                 | M | 20 <sup>o</sup> | 2              | P              | 3,056  | 3-1  | 6-3  | 12-5 | 479               | O | G <sup>c</sup>         | CIA   |
| 1773b | <i>Posidonia oceanica</i> (L.)<br>Del.                          | Yes            | Posidoniaceae                 | M | 20 <sup>o</sup> | 2              | P              | 3,555  | 3-6  | 7-3  | 14-5 | 479               | O | Trifolium <sup>c</sup> | FC:PI |
| 1774a | <i>Potentilla indica</i> (Andr.)<br>Focke                       | Yes            | Rosaceae                      | E | – <sup>n</sup>  | – <sup>p</sup> | P              | 1,751  | 1-8  | 3-6  | 7-2  | 527               | O | G <sup>c</sup>         | FC:PI |
| 1775a | <i>Premna latifolia</i> Roxb.                                   | No             | Lamiaceae <sup>k</sup>        | E | 28 <sup>o</sup> | 2              | P              | 1,516  | 1-6  | 3-1  | 6-2  | 501 <sup>ag</sup> | O | B <sup>c</sup>         | Fe    |
| 1776a | <i>Pritzelago alpina</i> (L.)<br>Kuntze                         | Yes            | Brassicaceae <sup>j</sup>     | E | 12              | – <sup>p</sup> | – <sup>q</sup> | 186    | 0-2  | 0-4  | 0-8  | 599               | O | L                      | FC:PI |
| 1777a | <i>Prosartes smithii</i> (Hook.)<br>Utech, Shinwari &<br>Kawano | Yes            | Liliaceae                     | M | 16              | 2              | P              | 3,325  | 3-4  | 6-8  | 13-6 | 565               | O | G                      | FC:PI |
| 1778a | <i>Prunus angustifolia</i> <sup>l</sup>                         | No             | Rosaceae                      | E | 16 <sup>o</sup> | 2              | P              | 298    | 0-3  | 0-6  | 1-2  | 606               | O | Gallus <sup>f</sup>    | FC:PI |
| 1779a | <i>Prunus besseyi</i><br>L.H.Bailey                             | No             | Rosaceae                      | E | 16 <sup>o</sup> | 2              | P              | 328    | 0-3  | 0-7  | 1-3  | 606               | O | Gallus <sup>f</sup>    | FC:PI |

Continued

| Entry number <sup>e</sup> | Species                                                                              | Voucher        | Family                      | Higher group <sup>f</sup> | 2n <sup>‡</sup> | Ploidy level (x) | Life cycle type <sup>§</sup> | DNA amount             |         |         |         | Original ref. <sup>‡</sup> | Present amount <sup>†</sup> | Standard species <sup>*b1</sup>   | Method <sup>††</sup> |
|---------------------------|--------------------------------------------------------------------------------------|----------------|-----------------------------|---------------------------|-----------------|------------------|------------------------------|------------------------|---------|---------|---------|----------------------------|-----------------------------|-----------------------------------|----------------------|
|                           |                                                                                      |                |                             |                           |                 |                  |                              | 1C (Mbp <sup>s</sup> ) | 1C (pg) | 2C (pg) | 4C (pg) |                            |                             |                                   |                      |
| 1780a                     | <i>Prunus cistena</i><br>N.E.Hensen                                                  | No             | Rosaceae                    | E                         | 16 <sup>o</sup> | 2                | P                            | 313                    | 0.3     | 0.6     | 1.3     | 606                        | O                           | <i>Gallus</i> <sup>f</sup>        | FC:PI                |
| 1781a                     | <i>Prunus davidiana</i> <sup>1</sup>                                                 | No             | Rosaceae                    | E                         | 16 <sup>o</sup> | 2                | P                            | 303                    | 0.3     | 0.6     | 1.2     | 606                        | O                           | <i>Gallus</i> <sup>f</sup>        | FC:PI                |
| 1782a                     | <i>Prunus domestica</i> <sup>1</sup>                                                 | No             | Rosaceae                    | E                         | – <sup>n</sup>  | – <sup>p</sup>   | P                            | 323                    | 0.3     | 0.7     | 1.3     | 563                        | O                           | <i>Solan.</i> <sup>c</sup>        | FC:PI                |
| 1783a                     | <i>Prunus dulcis</i> (Mill.)<br>D.A.Webb                                             | No             | Rosaceae                    | E                         | 16 <sup>o</sup> | 2                | P                            | 323                    | 0.3     | 0.7     | 1.3     | 606                        | O                           | <i>Gallus</i> <sup>f</sup>        | FC:PI                |
| 1784a                     | <i>Prunus fenzliana</i> Fritsch                                                      | No             | Rosaceae                    | E                         | 16 <sup>o</sup> | 2                | P                            | 367                    | 0.4     | 0.8     | 1.5     | 606                        | O                           | <i>Gallus</i> <sup>f</sup>        | FC:PI                |
| 1785a                     | <i>Prunus hortulana</i><br>L.H.Bailey                                                | No             | Rosaceae                    | E                         | 16 <sup>o</sup> | 2                | P                            | 293                    | 0.3     | 0.6     | 1.2     | 606                        | O                           | <i>Gallus</i> <sup>f</sup>        | FC:PI                |
| 1786a                     | <i>Prunus kansuensis</i><br>Rehder                                                   | No             | Rosaceae                    | E                         | 16 <sup>o</sup> | 2                | P                            | 293                    | 0.3     | 0.6     | 1.2     | 606                        | O                           | <i>Gallus</i> <sup>f</sup>        | FC:PI                |
| 1787a                     | <i>Prunus mira</i> <sup>1</sup>                                                      | No             | Rosaceae                    | E                         | 16 <sup>o</sup> | 2                | P                            | 323                    | 0.3     | 0.7     | 1.3     | 606                        | O                           | <i>Gallus</i> <sup>f</sup>        | FC:PI                |
| 1788a                     | <i>Prunus padus</i> L.                                                               | Yes            | Rosaceae                    | E                         | – <sup>n</sup>  | – <sup>p</sup>   | P                            | 1,149                  | 1.2     | 2.4     | 4.7     | 489                        | O                           | – <sup>w</sup>                    | FC:EB                |
| 1789c                     | <i>Prunus persica</i> <sup>1</sup>                                                   | No             | Rosaceae                    | E                         | – <sup>n</sup>  | – <sup>p</sup>   | P                            | 303                    | 0.3     | 0.6     | 1.2     | 563                        | O                           | <i>Solan.</i> <sup>c</sup>        | FC:PI                |
| 1789d                     | <i>Prunus persica</i> (L.)<br>Batsch cv. Jefferson                                   | No             | Rosaceae                    | E                         | 16 <sup>o</sup> | 2                | P                            | 323                    | 0.3     | 0.7     | 1.3     | 607                        | O                           | – <sup>w</sup>                    | Fe                   |
| 1789e                     | <i>Prunus persica</i> (L.)<br>Batsch cv. Jefferson                                   | No             | Rosaceae                    | E                         | 16 <sup>o</sup> | 2                | P                            | 303                    | 0.3     | 0.6     | 1.2     | 606                        | O                           | <i>Gallus</i> <sup>f</sup>        | FC:PI                |
| 1790a                     | <i>Prunus tomentosa</i> Thunb.                                                       | No             | Rosaceae                    | E                         | 16 <sup>o</sup> | 2                | P                            | 279                    | 0.3     | 0.6     | 1.1     | 606                        | O                           | <i>Gallus</i> <sup>f</sup>        | FC:PI                |
| 1791a                     | <i>Prunus webbii</i> <sup>1</sup>                                                    | No             | Rosaceae                    | E                         | 16 <sup>o</sup> | 2                | P                            | 377                    | 0.4     | 0.8     | 1.5     | 606                        | O                           | <i>Gallus</i> <sup>f</sup>        | FC:PI                |
| 1792a                     | <i>Psephellus marschallianus</i><br>(Sprengel) K.Koch                                | Yes            | Asteraceae <sup>j</sup>     | E                         | 30              | 2                | P                            | 1,751                  | 1.8     | 3.6     | 7.2     | 529                        | O                           | G <sup>c</sup>                    | CIA                  |
| 1793a                     | <i>Pseudobombax ellipticum</i><br>(Kunth) Dugand                                     | No             | Malvaceae <sup>k</sup>      | E                         | – <sup>n</sup>  | – <sup>p</sup>   | P                            | 1,712                  | 1.8     | 3.5     | 7.0     | 501 <sup>ag</sup>          | O                           | B <sup>c</sup>                    | Fe                   |
| 1794a                     | <i>Pseudoturritis turrita</i> (L.)<br>Al-Shehbaz                                     | Yes            | Brassicaceae <sup>j</sup>   | E                         | 16              | 2                | – <sup>q</sup>               | 372                    | 0.4     | 0.8     | 1.5     | 599                        | O                           | L                                 | FC:PI                |
| 1795a                     | <i>Psychine stylosa</i> Desf.                                                        | Yes            | Brassicaceae <sup>j</sup>   | E                         | 30              | – <sup>p</sup>   | – <sup>q</sup>               | 499                    | 0.5     | 1.0     | 2.0     | 599                        | O                           | L                                 | FC:PI                |
| 1796a                     | <i>Psychotria ipecacuanha</i><br>(Brot.) Stokes <sup>h, as</sup>                     | No             | Rubiaceae                   | E                         | 22              | – <sup>p</sup>   | P                            | 1,002                  | 1.0     | 2.1     | 4.1     | 578 <sup>as</sup>          | O                           | <i>Solan.</i> -1796b <sup>c</sup> | FC:PI                |
| 1796b                     | <i>Psychotria ipecacuanha</i><br>(Brot.) Stokes Mozar<br>population <sup>h, as</sup> | No             | Rubiaceae                   | E                         | – <sup>n</sup>  | – <sup>p</sup>   | P                            | 606                    | 0.6     | 1.2     | 2.5     | 578 <sup>as</sup>          | O                           | <i>Solan.</i> <sup>c</sup>        | FC:PI                |
| 1797a                     | <i>Pteroccephalus dumetorum</i> (Brouss.<br>ex Willd.) Coult.                        | – <sup>m</sup> | Caprifoliaceae <sup>k</sup> | E                         | 18              | 2                | P                            | 1,741                  | 1.8     | 3.6     | 7.1     | 477                        | O                           | <i>Glycine</i> <sup>e</sup>       | FC:PI                |
| 1798a                     | <i>Pteroccephalus lasiospermus</i> (Brouss.<br>ex Willd.) Coult.                     | – <sup>m</sup> | Caprifoliaceae              | E                         | 18 <sup>o</sup> | 2                | P                            | 1,614                  | 1.7     | 3.3     | 6.6     | 552                        | O                           | <i>Glycine</i> <sup>e</sup>       | FC:PI                |
| 1799a                     | <i>Pteroccephalus virens</i><br>Webb & Berthel.                                      | – <sup>m</sup> | Caprifoliaceae              | E                         | 18 <sup>o</sup> | 2                | P                            | 1,712                  | 1.8     | 3.5     | 7.0     | 552                        | O                           | <i>Glycine</i> <sup>e</sup>       | FC:PI                |
| 1800a                     | <i>Pterospartum tridentatum</i> <sup>1</sup>                                         | No             | Fabaceae <sup>j</sup>       | E                         | – <sup>n</sup>  | – <sup>p</sup>   | – <sup>q</sup>               | 2,269                  | 2.3     | 4.6     | 9.3     | 563                        | O                           | H <sup>c</sup>                    | FC:PI                |
| 1801a                     | <i>Ptilotrichum canescens</i><br>(DC.) C.A.Mey.                                      | Yes            | Brassicaceae <sup>j</sup>   | E                         | – <sup>n</sup>  | – <sup>p</sup>   | – <sup>q</sup>               | 2,210                  | 2.3     | 4.5     | 9.0     | 599                        | O                           | L                                 | FC:PI                |
| 1802a                     | <i>Ptilotrichum spinosum</i><br>Boiss.                                               | Yes            | Brassicaceae <sup>j</sup>   | E                         | 32              | – <sup>p</sup>   | – <sup>q</sup>               | 616                    | 0.6     | 1.3     | 2.5     | 599                        | O                           | L                                 | FC:PI                |
| 1803a                     | <i>Ptilotus atriplicifolius</i> <sup>1</sup>                                         | – <sup>m</sup> | Amaranthaceae               | E                         | – <sup>n</sup>  | – <sup>p</sup>   | – <sup>q</sup>               | 3,271                  | 3.3     | 6.7     | 13.4    | 526                        | O                           | A                                 | FC:PI                |
| 1804a                     | <i>Puccinellia palustris</i><br>(Seen.) Podp.                                        | Yes            | Poaceae <sup>j</sup>        | M                         | 42 <sup>o</sup> | 6                | P                            | 3,985                  | 4.1     | 8.2     | 16.3    | 580                        | O                           | G <sup>c</sup>                    | CIA                  |

|       |                                                                                      |                  |                       |   |                     |                |                |        |      |      |      |     |   |                               |         |
|-------|--------------------------------------------------------------------------------------|------------------|-----------------------|---|---------------------|----------------|----------------|--------|------|------|------|-----|---|-------------------------------|---------|
| 1805a | <i>Puccinellia stricta</i><br>(Hook.f.) Blom                                         | Yes              | Poaceae <sup>j</sup>  | M | 14                  | 2              | P              | 1,736  | 1.8  | 3.6  | 7.1  | 528 | O | – <sup>w</sup>                | FC:PI   |
| 1806a | <i>Puccinellia walkeri</i><br>(Cheeseman) Edgar<br>subsp. <i>chathamica</i>          | Yes              | Poaceae <sup>j</sup>  | M | 42                  | 6              | P              | 4,699  | 4.8  | 9.6  | 19.2 | 528 | O | – <sup>w</sup>                | FC:PI   |
| 1807a | <i>Pultenaea daphnoides</i><br>J.C.Wendl.                                            | – <sup>m</sup>   | Fabaceae <sup>j</sup> | E | – <sup>n</sup>      | – <sup>p</sup> | – <sup>q</sup> | 699    | 0.7  | 1.4  | 2.9  | 526 | O | A                             | FC:PI   |
| 1808a | <i>Pultenaea flexilis</i> Sm.                                                        | – <sup>m</sup>   | Fabaceae <sup>j</sup> | E | – <sup>n</sup>      | – <sup>p</sup> | – <sup>q</sup> | 2,518  | 2.6  | 5.2  | 10.3 | 526 | O | A                             | FC:PI   |
| 1809a | <i>Puya mirabilis</i> (Mez)<br>L.B.Sm.                                               | Yes              | Bromeliaceae          | M | – <sup>n</sup>      | – <sup>p</sup> | P              | 430    | 0.4  | 0.9  | 1.8  | 575 | O | <i>Raphanus</i> <sup>e</sup>  | FC:PI   |
| 1810a | <i>Puya stenothyrsa</i> (Baker)<br>Mez                                               | Yes              | Bromeliaceae          | M | – <sup>n</sup>      | – <sup>p</sup> | P              | 460    | 0.5  | 0.9  | 1.9  | 575 | O | <i>Raphanus</i> <sup>e</sup>  | FC:PI   |
| 1811b | <i>Pyracantha coccinea</i><br>M.Roem.                                                | Yes              | Rosaceae              | E | – <sup>n</sup>      | 2 <sup>z</sup> | P              | 729    | 0.7  | 1.5  | 3.0  | 527 | O | G <sup>c</sup>                | FC:PI   |
| 1812a | <i>Pyrrhanthera exigua</i><br>(Kirk) Zotov                                           | Yes              | Poaceae <sup>j</sup>  | M | c. 156 <sup>o</sup> | 26             | P              | 10,518 | 10.8 | 21.5 | 43.0 | 528 | O | – <sup>w</sup>                | FC:PI   |
| 1812b | <i>Pyrrhanthera exigua</i><br>(Kirk) Zotov                                           | Yes              | Poaceae <sup>j</sup>  | M | c. 156              | 26             | P              | 6,699  | 6.9  | 13.7 | 27.4 | 476 | O | <i>Actinidia</i> <sup>c</sup> | FC:PI   |
| 1813b | <i>Pyrus communis</i> <sup>l</sup>                                                   | No               | Rosaceae              | E | – <sup>n</sup>      | – <sup>p</sup> | P              | 606    | 0.6  | 1.2  | 2.5  | 563 | O | <i>Solan.</i> <sup>e</sup>    | FC:PI   |
| 1814b | <i>Quercus ilex</i> L. subsp.<br><i>ballota</i> (Desf.) Samp.                        | Yes              | Fagaceae              | E | – <sup>n</sup>      | – <sup>p</sup> | P              | 954    | 1.0  | 2.0  | 3.9  | 489 | O | – <sup>w</sup>                | FC:EB   |
| 1815e | <i>Quercus petraea</i><br>(Mattuschka) Liebl.                                        | Yes              | Fagaceae              | E | – <sup>n</sup>      | – <sup>p</sup> | P              | 817    | 0.8  | 1.7  | 3.3  | 489 | O | – <sup>w</sup>                | FC:EB   |
| 1816a | <i>Quercus pyrenaica</i> Willd.                                                      | Yes              | Fagaceae              | E | – <sup>n</sup>      | – <sup>p</sup> | P              | 817    | 0.8  | 1.7  | 3.3  | 489 | O | – <sup>w</sup>                | FC:EB   |
| 1817c | <i>Quercus robur</i> L. <sup>l</sup>                                                 | Yes              | Fagaceae              | E | – <sup>n</sup>      | – <sup>p</sup> | P              | 856    | 0.9  | 1.8  | 3.5  | 489 | O | – <sup>w</sup>                | FC:EB   |
| 1817d | <i>Quercus robur</i> L. <sup>i</sup>                                                 | Yes              | Fagaceae              | E | – <sup>n</sup>      | – <sup>p</sup> | P              | 758    | 0.8  | 1.6  | 3.1  | 489 | O | – <sup>w</sup>                | FC:EB   |
| 1817e | <i>Quercus robur</i> L.                                                              | No               | Fagaceae              | E | – <sup>n</sup>      | – <sup>p</sup> | P              | 1,066  | 1.1  | 2.2  | 4.4  | 492 | O | <i>Glycine</i> <sup>e</sup>   | FC:PI   |
| 1817f | <i>Quercus robur</i> L.                                                              | No               | Fagaceae              | E | – <sup>n</sup>      | – <sup>p</sup> | P              | 968    | 1.0  | 2.0  | 4.0  | 563 | O | <i>Glycine</i> <sup>e</sup>   | FC:PI   |
| 1818a | <i>Quercus rubra</i> L.                                                              | Yes              | Fagaceae              | E | – <sup>n</sup>      | – <sup>p</sup> | P              | 831    | 0.9  | 1.7  | 3.4  | 489 | O | – <sup>w</sup>                | FC:EB   |
| 1819b | <i>Quercus suber</i> L.                                                              | Yes              | Fagaceae              | E | – <sup>n</sup>      | – <sup>p</sup> | P              | 822    | 0.8  | 1.7  | 3.4  | 489 | O | – <sup>w</sup>                | FC:EB   |
| 1819c | <i>Quercus suber</i> L.                                                              | No <sup>m1</sup> | Fagaceae              | E | – <sup>n</sup>      | – <sup>p</sup> | P              | 983    | 1.0  | 2.0  | 4.0  | 584 | O | <i>Glycine</i> <sup>e</sup>   | FC:PI   |
| 1820a | <i>Ranunculus adoneus</i><br>Gray                                                    | Yes              | Ranunculaceae         | E | 16 <sup>o</sup>     | 2              | P              | 2,870  | 2.9  | 5.9  | 11.7 | 523 | O | F                             | FC:DAPI |
| 1821a | <i>Ranunculus adoneus</i><br>Gray                                                    | Yes              | Ranunculaceae         | E | 32 <sup>o</sup>     | 4              | P              | 5,844  | 6.0  | 12.0 | 23.9 | 523 | O | F                             | FC:DAPI |
| 1822a | <i>Ranunculus carpaticola</i><br>Soó                                                 | Yes              | Ranunculaceae         | E | 16                  | 2              | P              | 2,993  | 3.1  | 6.1  | 12.2 | 474 | O | G <sup>c</sup>                | Fe      |
| 1823a | <i>Ranunculus carpaticola</i><br>Soó                                                 | Yes              | Ranunculaceae         | E | 48                  | 6              | P              | 7,873  | 8.1  | 16.1 | 32.2 | 474 | O | G <sup>c</sup>                | Fe      |
| 1824a | <i>Ranunculus</i><br><i>cassubicifolius</i><br>W.Koch <sup>i</sup>                   | Yes              | Ranunculaceae         | E | 16                  | 2              | P              | 3,081  | 3.2  | 6.3  | 12.6 | 474 | O | G <sup>c</sup>                | Fe      |
| 1825a | <i>Ranunculus</i><br><i>cassubicifolius</i><br>W.Koch <sup>i</sup>                   | Yes              | Ranunculaceae         | E | 32                  | 4              | P              | 5,721  | 5.9  | 11.7 | 23.4 | 474 | O | G <sup>c</sup>                | Fe      |
| 1826a | <i>Ranunculus escholtzii</i><br>Schlechtendal var.<br><i>trisectus</i>               | Yes              | Ranunculaceae         | E | 16                  | 2              | P              | 3,076  | 3.1  | 6.3  | 12.6 | 523 | O | F                             | FC:DAPI |
| 1826b | <i>Ranunculus escholtzii</i><br>Schlechtendal var.<br><i>suksdorfii</i>              | Yes              | Ranunculaceae         | E | 16 <sup>o</sup>     | 2              | P              | 3,355  | 3.4  | 6.9  | 13.7 | 523 | O | F                             | FC:DAPI |
| 1827a | <i>Ranunculus escholtzii</i><br>Schlechtendal var.<br><i>escholtzii</i> <sup>i</sup> | Yes              | Ranunculaceae         | E | 32                  | 4              | P              | 7,169  | 7.3  | 14.7 | 29.3 | 523 | O | F                             | FC:DAPI |
| 1828a | <i>Ranunculus escholtzii</i><br>Schlechtendal var.<br><i>escholtzii</i>              | Yes              | Ranunculaceae         | E | 48                  | 6              | P              | 9,457  | 9.7  | 19.3 | 38.7 | 523 | O | F                             | FC:DAPI |

Continued

| Entry number <sup>e</sup> | Species                                                                  | Voucher        | Family                    | Higher group <sup>#</sup> | 2n <sup>‡</sup> | Ploidy level (x) | Life cycle type <sup>§</sup> | DNA amount             |                |         |         | Original ref. <sup>3</sup> | Present amount <sup>†</sup> | Standard species <sup>*b1</sup> | Method <sup>††</sup> |
|---------------------------|--------------------------------------------------------------------------|----------------|---------------------------|---------------------------|-----------------|------------------|------------------------------|------------------------|----------------|---------|---------|----------------------------|-----------------------------|---------------------------------|----------------------|
|                           |                                                                          |                |                           |                           |                 |                  |                              | 1C (Mbp <sup>s</sup> ) | 1C (pg)        | 2C (pg) | 4C (pg) |                            |                             |                                 |                      |
| 1828b                     | <i>Ranunculus escholtzii</i> Schlechtendal var. <i>oxynotus</i>          | Yes            | Ranunculaceae             | E                         | 48 <sup>o</sup> | 6                | P                            | 9,731                  | 10.0           | 19.9    | 39.8    | 523                        | O                           | F                               | FC:DAPI              |
| 1829a                     | <i>Ranunculus macauleyi</i> Gray                                         | Yes            | Ranunculaceae             | E                         | 16 <sup>o</sup> | 2                | P                            | 2,900                  | 3.0            | 5.9     | 11.9    | 523                        | O                           | F                               | FC:DAPI              |
| 1830g                     | <i>Raphanus sativus</i> L.                                               | No             | Brassicaceae <sup>j</sup> | E                         | – <sup>n</sup>  | – <sup>p</sup>   | AB                           | 675                    | 0.7            | 1.4     | 2.8     | 492                        | O                           | G <sup>c</sup>                  | FC:PI                |
| 1830h                     | <i>Raphanus sativus</i> L.                                               | – <sup>m</sup> | Brassicaceae <sup>j</sup> | E                         | 18 <sup>o</sup> | – <sup>p</sup>   | – <sup>q</sup>               | 570                    | 0.6            | 1.2     | 2.3     | 509                        | O                           | – <sup>w</sup>                  | FC:PI                |
| 1830i                     | <i>Raphanus sativus</i> L.                                               | Yes            | Brassicaceae <sup>j</sup> | E                         | 18              | – <sup>p</sup>   | – <sup>q</sup>               | 518                    | 0.5            | 1.1     | 2.1     | 599                        | O                           | L                               | FC:PI                |
| 1831a                     | <i>Reichardia ligulata</i> (Vent.) Kunk. & Sund.                         | – <sup>m</sup> | Asteraceae <sup>j</sup>   | E                         | 16              | 2                | P                            | 1,848                  | 1.9            | 3.8     | 7.6     | 477                        | O                           | <i>Glycine</i> <sup>e</sup>     | FC:PI                |
| 1832a                     | <i>Reseda scoparia</i> Brouss. ex Willd.                                 | – <sup>m</sup> | Resedaceae                | E                         | 30 <sup>o</sup> | ≥2               | P                            | 342                    | 0.4            | 0.7     | 1.4     | 552                        | O                           | <i>Raphanus</i> <sup>e</sup>    | FC:PI                |
| 1833a                     | <i>Rhamnus alpinus</i> L. subsp. <i>alpinus</i>                          | Yes            | Rhamnaceae                | E                         | – <sup>n</sup>  | – <sup>p</sup>   | P                            | 680                    | 0.7            | 1.4     | 2.8     | 489                        | O                           | – <sup>w</sup>                  | FC:EB                |
| 1834a                     | <i>Ribes alpinum</i> L.                                                  | Yes            | Grossulariaceae           | E                         | 16              | 2                | P                            | 988                    | 1.0            | 2.0     | 4.0     | 507                        | O                           | <i>Petunia</i> <sup>e</sup>     | FC:EB                |
| 1835a                     | <i>Ribes petraeum</i> Wulf.                                              | Yes            | Grossulariaceae           | E                         | 16              | 2                | P                            | 939                    | 1.0            | 1.9     | 3.8     | 507                        | O                           | <i>Petunia</i> <sup>e</sup>     | FC:EB                |
| 1836a                     | <i>Ribes rubrum</i> L.                                                   | Yes            | Grossulariaceae           | E                         | 16              | 2                | P                            | 949                    | 1.0            | 1.9     | 3.9     | 507                        | O                           | <i>Petunia</i> <sup>e</sup>     | FC:EB                |
| 1837a                     | <i>Ribes uva-crispa</i> L.                                               | Yes            | Grossulariaceae           | E                         | 16              | 2                | P                            | 919                    | 0.9            | 1.9     | 3.8     | 507                        | O                           | <i>Petunia</i> <sup>e</sup>     | FC:EB                |
| 1838c                     | <i>Ricinus communis</i> L.                                               | No             | Euphorbiaceae             | E                         | 20 <sup>o</sup> | 2                | P                            | 528                    | 0.5            | 1.1     | 2.2     | 501 <sup>ab</sup>          | O                           | B <sup>c</sup>                  | Fe                   |
| 1838d                     | <i>Ricinus communis</i> L.                                               | No             | Euphorbiaceae             | E                         | – <sup>n</sup>  | – <sup>p</sup>   | AP                           | 509                    | 0.5            | 1.0     | 2.1     | 518                        | O                           | <i>Raphanus</i> <sup>e</sup>    | FC:PI                |
| 1839b                     | <i>Robinia pseudoacacia</i> L.                                           | Yes            | Fabaceae <sup>j</sup>     | E                         | – <sup>n</sup>  | – <sup>p</sup>   | P                            | 719                    | 0.7            | 1.5     | 2.9     | 489                        | O                           | – <sup>w</sup>                  | FC:EB                |
| 1840a                     | <i>Rorippa palustris</i> (L.) Besser                                     | Yes            | Brassicaceae <sup>j</sup> | E                         | 32              | – <sup>p</sup>   | – <sup>q</sup>               | 528                    | 0.5            | 1.1     | 2.2     | 599                        | O                           | L                               | FC:PI                |
| 1841a                     | <i>Rubia fruticosa</i> Aiton subsp. <i>melanocarpa</i> (Bornm.) Bramwell | – <sup>m</sup> | Rubiaceae                 | E                         | 44, 45          | 4                | P                            | 2,699                  | 2.8            | 5.5     | 11.0    | 552                        | O                           | G <sup>c</sup>                  | FC:PI                |
| 1842a                     | <i>Rubus alceifolius</i> Poir.                                           | Yes            | Rosaceae                  | E                         | 21              | 3 <sup>z</sup>   | P                            | – <sup>1</sup>         | – <sup>1</sup> | 1.3     | 2.6     | 493 <sup>ac</sup>          | O                           | <i>Petunia</i> <sup>e</sup>     | FC:PI                |
| 1843a                     | <i>Rubus alceifolius</i> Poir.                                           | Yes            | Rosaceae                  | E                         | 28              | 4                | P                            | 841                    | 0.9            | 1.7     | 3.4     | 493 <sup>ac</sup>          | O                           | <i>Petunia</i> <sup>e</sup>     | FC:PI                |
| 1844a                     | <i>Rubus canadensis</i> L.                                               | No             | Rosaceae                  | E                         | 14 <sup>o</sup> | 2                | P                            | 289                    | 0.3            | 0.6     | 1.2     | 600                        | O                           | Trout <sup>f</sup>              | FC:PI                |
| 1845a                     | <i>Rubus canescens</i> DC.                                               | No             | Rosaceae                  | E                         | 14 <sup>o</sup> | 2                | P                            | 357                    | 0.4            | 0.7     | 1.5     | 600                        | O                           | Trout <sup>f</sup>              | FC:PI                |
| 1846a                     | <i>Rubus chamaemorus</i> L.                                              | – <sup>m</sup> | Rosaceae                  | E                         | 56              | 8                | P                            | 1,203                  | 1.2            | 2.5     | 4.9     | 499                        | O                           | H <sup>c</sup>                  | FC:PI                |
| 1847a                     | <i>Rubus crataegifolius</i> Bunge                                        | No             | Rosaceae                  | E                         | 14 <sup>o</sup> | 2                | P                            | 240                    | 0.2            | 0.5     | 1.0     | 600                        | O                           | Trout <sup>f</sup>              | FC:PI                |
| 1848a                     | <i>Rubus ellipticus</i> Sm.                                              | No             | Rosaceae                  | E                         | 14 <sup>o</sup> | 2                | P                            | 337                    | 0.3            | 0.7     | 1.4     | 600                        | O                           | Trout <sup>f</sup>              | FC:PI                |
| 1849a                     | <i>Rubus hispidus</i> L.                                                 | No             | Rosaceae                  | E                         | 14 <sup>o</sup> | 2                | P                            | 289                    | 0.3            | 0.6     | 1.2     | 600                        | O                           | Trout <sup>f</sup>              | FC:PI                |
| 1850a                     | <i>Rubus illecebrosus</i> Focke                                          | No             | Rosaceae                  | E                         | 14 <sup>o</sup> | 2                | P                            | 230                    | 0.2            | 0.5     | 0.9     | 600                        | O                           | Trout <sup>f</sup>              | FC:PI                |
| 1851a                     | <i>Rubus innominatus</i> S.Moore                                         | No             | Rosaceae                  | E                         | 14 <sup>o</sup> | 2                | P                            | 264                    | 0.3            | 0.5     | 1.1     | 600                        | O                           | Trout <sup>f</sup>              | FC:PI                |
| 1852a                     | <i>Rubus lasiococcus</i> A.Gray                                          | No             | Rosaceae                  | E                         | 14 <sup>o</sup> | 2                | P                            | 337                    | 0.3            | 0.7     | 1.4     | 600                        | O                           | Trout <sup>f</sup>              | FC:PI                |
| 1853a                     | <i>Rubus lasiostylus</i> Focke                                           | No             | Rosaceae                  | E                         | 14 <sup>o</sup> | 2                | P                            | 303                    | 0.3            | 0.6     | 1.2     | 600                        | O                           | Trout <sup>f</sup>              | FC:PI                |
| 1854a                     | <i>Rubus leucodermis</i> Doug ex Torrey & Gray                           | No             | Rosaceae                  | E                         | 14 <sup>o</sup> | 2                | P                            | 249                    | 0.3            | 0.5     | 1.0     | 600                        | O                           | Trout <sup>f</sup>              | FC:PI                |
| 1855a                     | <i>Rubus nivalis</i> Douglas ex Hook.                                    | No             | Rosaceae                  | E                         | 14 <sup>o</sup> | 2                | P                            | 274                    | 0.3            | 0.6     | 1.1     | 600                        | O                           | Trout <sup>f</sup>              | FC:PI                |
| 1856a                     | <i>Rubus niveus</i> Thunb.                                               | No             | Rosaceae                  | E                         | 14 <sup>o</sup> | 2                | P                            | 279                    | 0.3            | 0.6     | 1.1     | 600                        | O                           | Trout <sup>f</sup>              | FC:PI                |
| 1857a                     | <i>Rubus occidentalis</i> L.                                             | No             | Rosaceae                  | E                         | 14 <sup>o</sup> | 2                | P                            | 293                    | 0.3            | 0.6     | 1.2     | 600                        | O                           | Trout <sup>f</sup>              | FC:PI                |
| 1858b                     | <i>Rubus odoratus</i> L.                                                 | No             | Rosaceae                  | E                         | 14 <sup>o</sup> | 2                | P                            | 313                    | 0.3            | 0.6     | 1.3     | 600                        | O                           | Trout <sup>f</sup>              | FC:PI                |
| 1859a                     | <i>Rubus parviflorus</i> L.                                              | No             | Rosaceae                  | E                         | 14 <sup>o</sup> | 2                | P                            | 264                    | 0.3            | 0.5     | 1.1     | 600                        | O                           | Trout <sup>f</sup>              | FC:PI                |
| 1860a                     | <i>Rubus parvifolius</i> L.                                              | No             | Rosaceae                  | E                         | 14 <sup>o</sup> | 2                | P                            | 259                    | 0.3            | 0.5     | 1.1     | 600                        | O                           | Trout <sup>f</sup>              | FC:PI                |



|       |                                                                      |                |                      |   |     |   |   |       |     |      |      |     |   |                               |       |
|-------|----------------------------------------------------------------------|----------------|----------------------|---|-----|---|---|-------|-----|------|------|-----|---|-------------------------------|-------|
| 1861a | <i>Rubus pinfaensis</i> Lev. & Vaniot                                | No             | Rosaceae             | E | 14° | 2 | P | 289   | 0.3 | 0.6  | 1.2  | 600 | O | Trout <sup>f</sup>            | FC:PI |
| 1862a | <i>Rubus sanctus</i> Schreb.                                         | No             | Rosaceae             | E | 14° | 2 | P | 367   | 0.4 | 0.8  | 1.5  | 600 | O | Trout <sup>f</sup>            | FC:PI |
| 1863a | <i>Rubus simplex</i> Focke                                           | No             | Rosaceae             | E | 14° | 2 | P | 254   | 0.3 | 0.5  | 1.0  | 600 | O | Trout <sup>f</sup>            | FC:PI |
| 1864a | <i>Rubus spectabilis</i> Pursh                                       | No             | Rosaceae             | E | 14° | 2 | P | 264   | 0.3 | 0.5  | 1.1  | 600 | O | Trout <sup>f</sup>            | FC:PI |
| 1865a | <i>Rubus trivialis</i> Michx.                                        | No             | Rosaceae             | E | 14° | 2 | P | 347   | 0.4 | 0.7  | 1.4  | 600 | O | Trout <sup>f</sup>            | FC:PI |
| 1866b | <i>Rumex acetosa</i> L. (female)                                     | Yes            | Polygonaceae         | E | 14  | 2 | P | 3,423 | 3.5 | 7.0  | 14.0 | 573 | O | H <sup>c</sup>                | FC:PI |
| 1866c | <i>Rumex acetosa</i> L. (male)                                       | Yes            | Polygonaceae         | E | 15  | 2 | P | 3,668 | 3.8 | 7.5  | 15.0 | 573 | O | H <sup>c</sup>                | FC:PI |
| 1867a | <i>Rumex lunaria</i> L.                                              | – <sup>m</sup> | Polygonaceae         | E | 36° | 4 | P | 6,098 | 6.2 | 12.5 | 24.9 | 477 | O | G <sup>c</sup>                | FC:PI |
| 1868a | <i>Rumex maderensis</i> Lowe                                         | – <sup>m</sup> | Polygonaceae         | E | 20° | 2 | P | 675   | 0.7 | 1.4  | 2.8  | 477 | O | <i>Solan.</i> <sup>c</sup>    | FC:PI |
| 1869a | <i>Rumex nivalis</i> Hegetschw. (female) <sup>h</sup>                | No             | Polygonaceae         | E | 14  | 2 | P | 3,296 | 3.4 | 6.7  | 13.5 | 559 | O | <i>Epilob.</i> <sup>c</sup>   | FC:PI |
| 1869b | <i>Rumex nivalis</i> Hegetschw. (male) <sup>h</sup>                  | No             | Polygonaceae         | E | 15  | 2 | P | 3,623 | 3.7 | 7.4  | 14.8 | 559 | O | <i>Epilob.</i> <sup>c</sup>   | FC:PI |
| 1870a | <i>Ruppia cirrhosa</i> (Petagna) Grande                              | Yes            | Ruppiaceae           | M | 40° | 4 | P | 2,274 | 2.3 | 4.7  | 9.3  | 580 | O | G <sup>c</sup>                | CIA   |
| 1871a | <i>Rytidosperma biannulare</i> (Zotov) Connor & Edgar                | Yes            | Poaceae <sup>j</sup> | M | 48  | 4 | P | 3,941 | 4.0 | 8.1  | 16.1 | 528 | O | – <sup>w</sup>                | FC:PI |
| 1871b | <i>Rytidosperma biannulare</i> (Zotov) Connor & Edgar                | Yes            | Poaceae <sup>j</sup> | M | 48  | 4 | P | 2,690 | 2.8 | 5.5  | 11.0 | 476 | O | <i>Actinidia</i> <sup>c</sup> | FC:PI |
| 1872a | <i>Rytidosperma buchananii</i> (Hook.f.) Connor & Edgar              | Yes            | Poaceae <sup>j</sup> | M | 48  | 4 | P | 3,457 | 3.5 | 7.1  | 14.1 | 528 | O | – <sup>w</sup>                | FC:PI |
| 1873a | <i>Rytidosperma clavatum</i> (Zotov) Connor & Edgar                  | Yes            | Poaceae <sup>j</sup> | M | 24  | 2 | P | 1,623 | 1.7 | 3.3  | 6.6  | 528 | O | – <sup>w</sup>                | FC:PI |
| 1873b | <i>Rytidosperma clavatum</i> (Zotov) Connor & Edgar <sup>i</sup>     | Yes            | Poaceae <sup>j</sup> | M | 24  | 2 | P | 1,223 | 1.3 | 2.5  | 5.0  | 476 | O | <i>Actinidia</i> <sup>c</sup> | FC:PI |
| 1874a | <i>Rytidosperma corinum</i> Connor & Edgar                           | Yes            | Poaceae <sup>j</sup> | M | 48  | 4 | P | 3,516 | 3.6 | 7.2  | 14.4 | 528 | O | – <sup>w</sup>                | FC:PI |
| 1875a | <i>Rytidosperma gracile</i> (Hook.f.) Connor & Edgar                 | Yes            | Poaceae <sup>j</sup> | M | 24  | 2 | P | 1,213 | 1.2 | 2.5  | 5.0  | 528 | O | – <sup>w</sup>                | FC:PI |
| 1875b | <i>Rytidosperma gracile</i> (Hook.f.) Connor & Edgar                 | Yes            | Poaceae <sup>j</sup> | M | 24  | 2 | P | 929   | 1.0 | 1.9  | 3.8  | 476 | O | <i>Actinidia</i> <sup>c</sup> | FC:PI |
| 1876a | <i>Rytidosperma horrens</i> Connor & Molloy                          | Yes            | Poaceae <sup>j</sup> | M | 24  | 2 | P | 1,790 | 1.8 | 3.7  | 7.3  | 528 | O | – <sup>w</sup>                | FC:PI |
| 1877a | <i>Rytidosperma maculatum</i> (Zotov) Connor & Edgar                 | Yes            | Poaceae <sup>j</sup> | M | 48  | 4 | P | 2,954 | 3.0 | 6.0  | 12.1 | 528 | O | – <sup>w</sup>                | FC:PI |
| 1877b | <i>Rytidosperma maculatum</i> (Zotov) Connor & Edgar                 | Yes            | Poaceae <sup>j</sup> | M | 48  | 4 | P | 2,152 | 2.2 | 4.4  | 8.8  | 476 | O | <i>Actinidia</i> <sup>c</sup> | FC:PI |
| 1878a | <i>Rytidosperma petrosum</i> Connor & Edgar                          | Yes            | Poaceae <sup>j</sup> | M | 48  | 4 | P | 4,039 | 4.1 | 8.3  | 16.5 | 528 | O | – <sup>w</sup>                | FC:PI |
| 1879a | <i>Rytidosperma pumilum</i> (Kirk) Connor & Edgar                    | Yes            | Poaceae <sup>j</sup> | M | 24  | 2 | P | 1,584 | 1.6 | 3.2  | 6.5  | 528 | O | – <sup>w</sup>                | FC:PI |
| 1880a | <i>Rytidosperma setifolium</i> (Hook.f.) Connor & Edgar <sup>i</sup> | Yes            | Poaceae <sup>j</sup> | M | 24  | 2 | P | 2,425 | 2.5 | 5.0  | 9.9  | 528 | O | – <sup>w</sup>                | FC:PI |

Continued

| Entry number <sup>g</sup> | Species                                                              | Voucher         | Family                     | Higher group <sup>#</sup> | 2n <sup>‡</sup> | Ploidy level (x) | Life cycle type <sup>§</sup> | DNA amount             |         |         |         | Original ref. <sup>a</sup> | Present amount <sup>†</sup> | Standard species <sup>*b1</sup> | Method <sup>††</sup> |
|---------------------------|----------------------------------------------------------------------|-----------------|----------------------------|---------------------------|-----------------|------------------|------------------------------|------------------------|---------|---------|---------|----------------------------|-----------------------------|---------------------------------|----------------------|
|                           |                                                                      |                 |                            |                           |                 |                  |                              | 1C (Mbp <sup>s</sup> ) | 1C (pg) | 2C (pg) | 4C (pg) |                            |                             |                                 |                      |
| 1880b                     | <i>Rytidosperma setifolium</i> (Hook.f.) Connor & Edgar              | Yes             | Poaceae <sup>j</sup>       | M                         | 24              | 2                | P                            | 1,614                  | 1.7     | 3.3     | 6.6     | 476                        | O                           | <i>Actinidia</i> <sup>c</sup>   | FC:PI                |
| 1881a                     | <i>Rytidosperma telmaticum</i> Connor & Molloy <sup>i</sup>          | Yes             | Poaceae <sup>j</sup>       | M                         | 24              | 2                | P                            | 1,384                  | 1.4     | 2.8     | 5.7     | 528                        | O                           | – <sup>w</sup>                  | FC:PI                |
| 1881b                     | <i>Rytidosperma telmaticum</i> Connor & Molloy <sup>i</sup>          | Yes             | Poaceae <sup>j</sup>       | M                         | 24              | 2                | P                            | 1,677                  | 1.7     | 3.4     | 6.9     | 528                        | O                           | – <sup>w</sup>                  | FC:PI                |
| 1882a                     | <i>Rytidosperma thomsonii</i> (Buchanan) Connor & Edgar <sup>i</sup> | Yes             | Poaceae <sup>j</sup>       | M                         | 24              | 2                | P                            | 1,716                  | 1.8     | 3.5     | 7.0     | 528                        | O                           | – <sup>w</sup>                  | FC:PI                |
| 1883a                     | <i>Rytidosperma thomsonii</i> (Buchanan) Connor & Edgar <sup>i</sup> | Yes             | Poaceae <sup>j</sup>       | M                         | 48              | 4                | P                            | 3,066                  | 3.1     | 6.3     | 12.5    | 528                        | O                           | – <sup>w</sup>                  | FC:PI                |
| 1884a                     | <i>Rytidosperma unarede</i> (Raoul) Connor & Edgar                   | Yes             | Poaceae <sup>j</sup>       | M                         | 48              | 4                | P                            | 2,494                  | 2.6     | 5.1     | 10.2    | 476                        | O                           | <i>Actinidia</i> <sup>c</sup>   | FC:PI                |
| 1885a                     | <i>Rytidosperma viride</i> (Zotov) Connor & Edgar                    | Yes             | Poaceae <sup>j</sup>       | M                         | 24              | 2                | P                            | 1,350                  | 1.4     | 2.8     | 5.5     | 528                        | O                           | – <sup>w</sup>                  | FC:PI                |
| 1886a                     | <i>Saintpaulia ionantha</i> H.Wendl.                                 | No              | Gesneriaceae               | E                         | – <sup>n</sup>  | – <sup>p</sup>   | P                            | 734                    | 0.8     | 1.5     | 3.0     | 563                        | O                           | <i>Solan.</i> <sup>c</sup>      | FC:PI                |
| 1887a                     | <i>Salicornia europaea</i> L.                                        | Yes             | Amaranthaceae              | E                         | 18 <sup>o</sup> | 2                | A                            | 1,345                  | 1.4     | 2.8     | 5.5     | 580                        | O                           | G <sup>c</sup>                  | CIA                  |
| 1888b                     | <i>Salix atrocinerea</i> Brot.                                       | Yes             | Salicaceae                 | E                         | – <sup>n</sup>  | – <sup>p</sup>   | P                            | 782                    | 0.8     | 1.6     | 3.2     | 489                        | O                           | – <sup>w</sup>                  | FC:EB                |
| 1889a                     | <i>Salix babylonica</i> L.                                           | Yes             | Salicaceae                 | E                         | – <sup>n</sup>  | – <sup>p</sup>   | P                            | 748                    | 0.8     | 1.5     | 3.1     | 489                        | O                           | – <sup>w</sup>                  | FC:EB                |
| 1889b                     | <i>Salix babylonica</i> L.                                           | No              | Salicaceae                 | E                         | – <sup>n</sup>  | – <sup>p</sup>   | P                            | 787                    | 0.8     | 1.6     | 3.2     | 563                        | O                           | <i>Solan.</i> <sup>c</sup>      | FC:PI                |
| 1890a                     | <i>Salsola kali</i> L.                                               | – <sup>m</sup>  | Amaranthaceae              | E                         | – <sup>n</sup>  | – <sup>p</sup>   | – <sup>q</sup>               | 597                    | 0.6     | 1.2     | 2.4     | 526                        | O                           | A                               | FC:PI                |
| 1891a                     | <i>Salsola soda</i> L.                                               | Yes             | Amaranthaceae <sup>k</sup> | E                         | 18 <sup>o</sup> | 2                | A                            | 1,281                  | 1.3     | 2.6     | 5.2     | 580                        | O                           | G <sup>c</sup>                  | CIA                  |
| 1892a                     | <i>Salvadora persica</i> L.                                          | No              | Salvadoraceae              | E                         | 24 <sup>o</sup> | – <sup>p</sup>   | P                            | 411                    | 0.4     | 0.8     | 1.7     | 612                        | O                           | <i>Solan.</i> <sup>c</sup>      | FC:PI                |
| 1893a                     | <i>Salvia brachyodon</i> Vandas                                      | Yes             | Lamiaceae <sup>j</sup>     | E                         | 14              | 2                | P                            | 465                    | 0.5     | 1.0     | 1.9     | 549                        | O                           | <i>Petunia</i> <sup>c</sup>     | FC:PI                |
| 1894a                     | <i>Salvia broussonetii</i> Bentham                                   | – <sup>m</sup>  | Lamiaceae <sup>j</sup>     | E                         | 22 <sup>o</sup> | 2                | P                            | 421                    | 0.4     | 0.9     | 1.7     | 477                        | O                           | <i>Raphanus</i> <sup>c</sup>    | FC:PI                |
| 1895a                     | <i>Salvia canariensis</i> L.                                         | – <sup>m</sup>  | Lamiaceae <sup>j</sup>     | E                         | 22 <sup>o</sup> | 2                | P                            | 484                    | 0.5     | 1.0     | 2.0     | 552                        | O                           | <i>Raphanus</i> <sup>c</sup>    | FC:PI                |
| 1896a                     | <i>Salvia officinalis</i> L.                                         | Yes             | Lamiaceae <sup>j</sup>     | E                         | 14              | 2                | P                            | 474                    | 0.5     | 1.0     | 1.9     | 549                        | O                           | <i>Petunia</i> <sup>c</sup>     | FC:PI                |
| 1897a                     | <i>Sapindus emarginatus</i> Vahl                                     | No              | Sapindaceae                | E                         | 30 <sup>o</sup> | 2                | P                            | 518                    | 0.5     | 1.1     | 2.1     | 501 <sup>ab</sup>          | O                           | B <sup>c</sup>                  | Fe                   |
| 1898a                     | <i>Sarcocornia fruticosa</i> (L.) A.J.Scott                          | Yes             | Amaranthaceae              | E                         | 54 <sup>o</sup> | 6                | P                            | 2,890                  | 3.0     | 5.9     | 11.8    | 580                        | O                           | G <sup>c</sup>                  | CIA                  |
| 1899a                     | <i>Sarracenia flava</i> L.                                           | No <sup>m</sup> | Sarraceniaceae             | E                         | 26              | – <sup>p</sup>   | P                            | 4,249                  | 4.3     | 8.7     | 17.4    | 612                        | O                           | G                               | FC:PI                |
| 1900a                     | <i>Schizogyne glaberrima</i> DC.                                     | – <sup>m</sup>  | Asteraceae <sup>j</sup>    | E                         | 18 <sup>o</sup> | 2                | P                            | 1,002                  | 1.0     | 2.1     | 4.1     | 477                        | O                           | <i>Glycine</i> <sup>c</sup>     | FC:PI                |
| 1901a                     | <i>Schizogyne sericea</i> (L.f.) DC.                                 | – <sup>m</sup>  | Asteraceae <sup>j</sup>    | E                         | 18 <sup>o</sup> | 2                | P                            | 1,002                  | 1.0     | 2.1     | 4.1     | 477                        | O                           | <i>Glycine</i> <sup>c</sup>     | FC:PI                |
| 1902a                     | <i>Schouwia purpurea</i> (Forsk.) Schweinf.                          | No              | Brassicaceae <sup>j</sup>  | E                         | 36              | 2                | A                            | 871                    | 0.9     | 1.8     | 3.6     | 602                        | O                           | <i>Solan.</i> <sup>c</sup>      | FC:PI                |
| 1903c                     | <i>Scilla autumnalis</i> L. (race B5B5)                              | No              | Asparagaceae               | M                         | 10              | 2                | P                            | 4,890                  | 5.0     | 10.0    | 20.0    | 601                        | O                           | C <sup>d</sup>                  | Fe                   |
| 1903d                     | <i>Scilla autumnalis</i> L. (race C6C6)                              | No              | Asparagaceae               | M                         | 12              | 2                | P                            | 6,846                  | 7.0     | 14.0    | 28.0    | 601                        | O                           | C <sup>d</sup>                  | Fe                   |

|       |                                                                             |                  |                           |   |                          |                |                |       |     |      |      |                   |   |                              |       |
|-------|-----------------------------------------------------------------------------|------------------|---------------------------|---|--------------------------|----------------|----------------|-------|-----|------|------|-------------------|---|------------------------------|-------|
| 1903e | <i>Scilla autumnalis</i> L. (race B7B7)                                     | No               | Asparagaceae              | M | 14                       | 2              | P              | 5,624 | 5-8 | 11-5 | 23-0 | 601               | O | C <sup>d</sup>               | Fe    |
| 1903f | <i>Scilla autumnalis</i> L. (race AA)                                       | No               | Asparagaceae              | M | 14                       | 2              | P              | 8,313 | 8-5 | 17-0 | 34-0 | 601               | O | C <sup>d</sup>               | Fe    |
| 1904a | <i>Scilla dasyantha</i> Webb & Berthel.                                     | – <sup>m</sup>   | Asparagaceae <sup>k</sup> | M | 28                       | 4              | P              | 9,311 | 9-5 | 19-0 | 38-1 | 552               | O | G <sup>c</sup>               | FC:PI |
| 1905a | <i>Scilla haemorrhoidalis</i> Webb & Berthel.                               | – <sup>m</sup>   | Asparagaceae <sup>k</sup> | M | 28 <sup>o</sup>          | 4              | P              | 9,227 | 9-4 | 18-9 | 37-7 | 552               | O | G <sup>c</sup>               | FC:PI |
| 1906a | <i>Sclerochloa dura</i> (L.) P.Beauv.                                       | – <sup>m</sup>   | Poaceae <sup>j</sup>      | M | 14 <sup>o</sup>          | 2              | P              | 1,524 | 1-6 | 3-1  | 6-2  | 555               | O | G <sup>c</sup>               | FC:PI |
| 1907a | <i>Sclerolaena diacantha</i> (Nees) Benth.                                  | – <sup>m</sup>   | Amaranthaceae             | E | – <sup>n</sup>           | – <sup>p</sup> | – <sup>q</sup> | 1,208 | 1-2 | 2-5  | 4-9  | 526               | O | A                            | FC:PI |
| 1908a | <i>Scoliopus bigelovii</i> Torr.                                            | Yes              | Liliaceae                 | M | 16                       | 2              | P              | 8,998 | 9-2 | 18-4 | 36-8 | 565               | O | B                            | FC:PI |
| 1909a | <i>Scrophularia glabrata</i> Ait.                                           | – <sup>m</sup>   | Scrophulariaceae          | E | 56 <sup>o</sup>          | 8              | P              | 1,007 | 1-0 | 2-1  | 4-1  | 477               | O | <i>Glycine</i> <sup>e</sup>  | FC:PI |
| 1910a | <i>Scrophularia smithii</i> Hornem. subsp. <i>langeana</i> (Bolle) Dalgaard | – <sup>m</sup>   | Scrophulariaceae          | E | 58 <sup>o</sup>          | 8              | P              | 1,012 | 1-0 | 2-1  | 4-1  | 552               | O | <i>Glycine</i> <sup>e</sup>  | FC:PI |
| 1910b | <i>Scrophularia smithii</i> Hornem. subsp. <i>smithii</i>                   | – <sup>m</sup>   | Scrophulariaceae          | E | 58 <sup>o</sup>          | 8              | P              | 1,017 | 1-0 | 2-1  | 4-2  | 477               | O | <i>Glycine</i> <sup>e</sup>  | FC:PI |
| 1911n | <i>Secale cereale</i> L.                                                    | Yes              | Poaceae <sup>j</sup>      | M | – <sup>n</sup>           | – <sup>p</sup> | A              | 7,829 | 8-0 | 16-0 | 32-0 | 492               | O | G <sup>c</sup>               | FC:PI |
| 1911o | <i>Secale cereale</i> L.                                                    | No <sup>m1</sup> | Poaceae <sup>j</sup>      | M | 14                       | 2              | A              | 8,460 | 8-7 | 17-3 | 34-6 | 605               | O | F <sup>c</sup>               | FC:PI |
| 1911p | <i>Secale cereale</i> L. cv. Malish 72                                      | No               | Poaceae <sup>j</sup>      | M | 14 <sup>o</sup>          | 2              | A              | 7,858 | 8-0 | 16-1 | 32-1 | 610               | C | A <sup>c</sup>               | Fe    |
| 1912d | <i>Secale montanum</i> Guss.                                                | No <sup>m1</sup> | Poaceae <sup>j</sup>      | M | 14                       | 2              | P              | 9,242 | 9-5 | 18-9 | 37-8 | 605               | O | F <sup>c</sup>               | FC:PI |
| 1913d | <i>Secale vavilovii</i> Grossh.                                             | No <sup>m1</sup> | Poaceae <sup>j</sup>      | M | 14                       | 2              | A              | 8,518 | 8-7 | 17-4 | 34-8 | 605               | O | F <sup>c</sup>               | FC:PI |
| 1914a | <i>Sedum burrito</i> Moran                                                  | No               | Crassulaceae              | E | – <sup>n</sup>           | – <sup>p</sup> | – <sup>q</sup> | 636   | 0-7 | 1-3  | 2-6  | 587               | O | <i>Solan.</i> <sup>e</sup>   | FC:PI |
| 1915a | <i>Semele androgyna</i> (L.) Kunth <sup>i</sup>                             | Yes              | Asparagaceae              | M | 30 <sup>o</sup>          | 2              | P              | 5,770 | 5-9 | 11-8 | 23-6 | 490               | O | G                            | FC:EB |
| 1915b | <i>Semele androgyna</i> (L.) Kunth                                          | – <sup>m</sup>   | Asparagaceae <sup>k</sup> | M | 40 <sup>o</sup>          | 4              | P              | 6,333 | 6-5 | 13-0 | 25-9 | 552               | O | G <sup>c</sup>               | FC:PI |
| 1916a | <i>Semele maderensis</i> G.Costa <sup>i</sup>                               | Yes              | Asparagaceae              | M | 30 <sup>o</sup>          | 2              | P              | 5,575 | 5-7 | 11-4 | 22-8 | 490               | O | G                            | FC:EB |
| 1917a | <i>Semele menezesi</i> G.Costa <sup>i</sup>                                 | Yes              | Asparagaceae              | M | 30 <sup>o</sup>          | 2              | P              | 5,672 | 5-8 | 11-6 | 23-2 | 490               | O | G                            | FC:EB |
| 1918a | <i>Semele pterygophora</i> G.Costa <sup>i</sup>                             | Yes              | Asparagaceae              | M | 30 <sup>o</sup>          | 2              | P              | 5,624 | 5-8 | 11-5 | 23-0 | 490               | O | G                            | FC:EB |
| 1919a | <i>Senecio inaequidens</i> DC. (s.l.) <sup>h</sup>                          | Yes              | Asteraceae <sup>j</sup>   | E | 20                       | 2              | P              | 562   | 0-6 | 1-2  | 2-3  | 539 <sup>ap</sup> | O | <i>Medicago</i> <sup>e</sup> | FC:PI |
| 1919b | <i>Senecio inaequidens</i> DC. (s.l.) <sup>h</sup>                          | Yes              | Asteraceae <sup>j</sup>   | E | 20                       | 2              | P              | 763   | 0-8 | 1-6  | 3-1  | 539 <sup>ap</sup> | O | <i>Medicago</i> <sup>e</sup> | FC:PI |
| 1920a | <i>Senecio inaequidens</i> DC. (s.l.) <sup>h</sup>                          | Yes              | Asteraceae <sup>j</sup>   | E | 40                       | 4              | P              | 1,051 | 1-1 | 2-2  | 4-3  | 539 <sup>ap</sup> | O | <i>Medicago</i> <sup>e</sup> | FC:PI |
| 1920b | <i>Senecio inaequidens</i> DC. (s.l.) <sup>h</sup>                          | Yes              | Asteraceae <sup>j</sup>   | E | 40                       | 4              | P              | 1,262 | 1-3 | 2-6  | 5-2  | 539 <sup>ap</sup> | O | <i>Medicago</i> <sup>e</sup> | FC:PI |
| 1921a | <i>Senecio palmensis</i> (Chr. Sm. in Buch) Link                            | – <sup>m</sup>   | Asteraceae <sup>j</sup>   | E | 20                       | 2              | P              | 958   | 1-0 | 2-0  | 3-9  | 477               | O | <i>Glycine</i> <sup>e</sup>  | FC:PI |
| 1922a | <i>Senecio teneriffae</i> Sch.Bip. ex Bolle                                 | – <sup>m</sup>   | Asteraceae <sup>j</sup>   | E | 60 <sup>o</sup>          | 6              | A              | 2,572 | 2-6 | 5-3  | 10-5 | 477               | O | G <sup>c</sup>               | FC:PI |
| 1923a | <i>Senna artemisioides</i> <sup>l</sup>                                     | – <sup>m</sup>   | Fabaceae <sup>j</sup>     | E | – <sup>n</sup>           | – <sup>p</sup> | – <sup>q</sup> | 1,208 | 1-2 | 2-5  | 4-9  | 526               | O | A                            | FC:PI |
| 1924a | <i>Seseli webbii</i> Coss.                                                  | – <sup>m</sup>   | Apiaceae <sup>j</sup>     | E | 22 <sup>o</sup>          | 2              | P              | 1,853 | 1-9 | 3-8  | 7-6  | 477               | O | <i>Glycine</i> <sup>e</sup>  | FC:PI |
| 1925d | <i>Sesleria albicans</i> Kit. ex Schult. <sup>h</sup>                       | Yes              | Poaceae <sup>j</sup>      | M | 28                       | 4              | P              | 4,738 | 4-8 | 9-7  | 19-4 | 579               | O | <i>Homo</i> <sup>f</sup>     | FC:PI |
| 1925e | <i>Sesleria albicans</i> Kit. ex Schult. <sup>h</sup>                       | Yes              | Poaceae <sup>j</sup>      | M | 28                       | 4              | P              | 4,817 | 4-9 | 9-9  | 19-7 | 579               | O | <i>Homo</i> <sup>f</sup>     | FC:PI |
| 1926a | <i>Sideritis brevicaulis</i> Mend.-Heuer                                    | – <sup>m</sup>   | Lamiaceae <sup>j</sup>    | E | 36 (38, 40) <sup>o</sup> | 4              | P              | 1,785 | 1-8 | 3-7  | 7-3  | 552               | O | <i>Glycine</i> <sup>e</sup>  | FC:PI |

Continued

| Entry number <sup>e</sup> | Species                                                                 | Voucher        | Family                    | Higher group <sup>f</sup> | 2n <sup>‡</sup>      | Ploidy level (x) | Life cycle type <sup>g</sup> | DNA amount             |         |         |         | Original ref. <sup>a</sup> | Present amount <sup>†</sup> | Standard species <sup>*b1</sup> | Method <sup>††</sup> |
|---------------------------|-------------------------------------------------------------------------|----------------|---------------------------|---------------------------|----------------------|------------------|------------------------------|------------------------|---------|---------|---------|----------------------------|-----------------------------|---------------------------------|----------------------|
|                           |                                                                         |                |                           |                           |                      |                  |                              | 1C (Mbp <sup>s</sup> ) | 1C (pg) | 2C (pg) | 4C (pg) |                            |                             |                                 |                      |
| 1927a                     | <i>Sideritis canariensis</i> L.                                         | – <sup>m</sup> | Lamiaceae <sup>j</sup>    | E                         | 44 <sup>o</sup>      | 4                | P                            | 1,741                  | 1.8     | 3.6     | 7.1     | 477                        | O                           | <i>Glycine</i> <sup>e</sup>     | FC:PI                |
| 1928a                     | <i>Sideritis cretica</i> L. subsp. <i>cretica</i>                       | – <sup>m</sup> | Lamiaceae <sup>j</sup>    | E                         | 44 (34) <sup>o</sup> | 4                | P                            | 2,010                  | 2.1     | 4.1     | 8.2     | 552                        | O                           | <i>Glycine</i> <sup>e</sup>     | FC:PI                |
| 1929a                     | <i>Sideritis dendro-chahorra</i> Bolle                                  | – <sup>m</sup> | Lamiaceae <sup>j</sup>    | E                         | 38-42 <sup>o</sup>   | 4                | P                            | 1,775                  | 1.8     | 3.6     | 7.3     | 552                        | O                           | <i>Glycine</i> <sup>e</sup>     | FC:PI                |
| 1930a                     | <i>Sideritis infernalis</i> Bolle                                       | – <sup>m</sup> | Lamiaceae <sup>j</sup>    | E                         | 40 <sup>o</sup>      | 4                | P                            | 1,770                  | 1.8     | 3.6     | 7.2     | 552                        | O                           | <i>Glycine</i> <sup>e</sup>     | FC:PI                |
| 1931a                     | <i>Sideritis macrostachys</i> Poir.                                     | – <sup>m</sup> | Lamiaceae <sup>j</sup>    | E                         | ~36                  | 4                | P                            | 1,971                  | 2.0     | 4.0     | 8.1     | 477                        | O                           | <i>Glycine</i> <sup>e</sup>     | FC:PI                |
| 1932a                     | <i>Sideritis roteneriffae</i> Negrín & Pérez var. <i>roteneriffae</i>   | – <sup>m</sup> | Lamiaceae <sup>j</sup>    | E                         | 44 <sup>o</sup>      | 4                | P                            | 1,785                  | 1.8     | 3.7     | 7.3     | 477                        | O                           | <i>Glycine</i> <sup>e</sup>     | FC:PI                |
| 1933a                     | <i>Siebera pungens</i> J.Gay                                            | Yes            | Asteraceae <sup>j</sup>   | E                         | 20                   | 2                | A                            | 8,303                  | 8.5     | 17.0    | 34.0    | 502                        | O                           | F <sup>b2</sup>                 | FC:PI                |
| 1934a                     | <i>Silene berthelotiana</i> Webb                                        | – <sup>m</sup> | Caryophyllaceae           | E                         | 24                   | 2                | P                            | 2,499                  | 2.6     | 5.1     | 10.2    | 477                        | O                           | G <sup>c</sup>                  | FC:PI                |
| 1935a                     | <i>Silene lagunensis</i> Chr. Sm. ex Christ                             | – <sup>m</sup> | Caryophyllaceae           | E                         | 24                   | 2                | P                            | 2,538                  | 2.6     | 5.2     | 10.4    | 477                        | O                           | G <sup>c</sup>                  | FC:PI                |
| 1936a                     | <i>Silene nocteolens</i> Webb & Berth.                                  | – <sup>m</sup> | Caryophyllaceae           | E                         | 24                   | 2                | P                            | 2,523                  | 2.6     | 5.2     | 10.3    | 477                        | O                           | G <sup>c</sup>                  | FC:PI                |
| 1937a                     | <i>Silene pogonocalyx</i> (Svent.) Bramw.                               | – <sup>m</sup> | Caryophyllaceae           | E                         | 24                   | 2                | P                            | 2,557                  | 2.6     | 5.2     | 10.5    | 477                        | O                           | G <sup>c</sup>                  | FC:PI                |
| 1938a                     | <i>Simarouba glauca</i> DC.                                             | No             | Simaroubaceae             | E                         | – <sup>n</sup>       | – <sup>p</sup>   | P                            | 1,002                  | 1.0     | 2.1     | 4.1     | 501 <sup>ag</sup>          | O                           | B <sup>c</sup>                  | Fe                   |
| 1939a                     | <i>Simplicia buchananii</i> (Zotov) Zotov                               | Yes            | Poaceae <sup>j</sup>      | M                         | 28                   | 4                | P                            | 5,413                  | 5.5     | 11.1    | 22.1    | 528                        | O                           | – <sup>w</sup>                  | FC:PI                |
| 1940a                     | <i>Simplicia laxa</i> Kirk                                              | Yes            | Poaceae <sup>j</sup>      | M                         | 28                   | 4                | P                            | 5,007                  | 5.1     | 10.2    | 20.5    | 528                        | O                           | – <sup>w</sup>                  | FC:PI                |
| 1941a                     | <i>Sinapidendron angustifolium</i> (DC.) Lowe                           | – <sup>m</sup> | Brassicaceae <sup>j</sup> | E                         | 20 <sup>o</sup>      | 2                | P                            | 518                    | 0.5     | 1.1     | 2.1     | 552                        | O                           | <i>Solan.</i> <sup>c</sup>      | FC:PI                |
| 1942a                     | <i>Sinapidendron frutescens</i> Lowe                                    | Yes            | Brassicaceae <sup>j</sup> | E                         | 20                   | – <sup>p</sup>   | – <sup>q</sup>               | 548                    | 0.6     | 1.1     | 2.2     | 599                        | O                           | L                               | FC:PI                |
| 1943a                     | <i>Sinapidendron gymnocalyx</i> (Lowe) Rustan                           | – <sup>m</sup> | Brassicaceae <sup>j</sup> | E                         | 20 <sup>o</sup>      | 2                | P                            | 523                    | 0.5     | 1.1     | 2.1     | 552                        | O                           | <i>Solan.</i> <sup>c</sup>      | FC:PI                |
| 1944b                     | <i>Sinapis alba</i> L.                                                  | – <sup>m</sup> | Brassicaceae <sup>j</sup> | E                         | 24 <sup>o</sup>      | – <sup>p</sup>   | A                            | 554                    | 0.6     | 1.1     | 2.3     | 509                        | O                           | – <sup>w</sup>                  | FC:PI                |
| 1945b                     | <i>Sinapis arvensis</i> L.                                              | No             | Brassicaceae <sup>j</sup> | E                         | – <sup>n</sup>       | – <sup>p</sup>   | A                            | 660                    | 0.7     | 1.4     | 2.7     | 492                        | O                           | <i>Glycine</i> <sup>e</sup>     | FC:PI                |
| 1946a                     | <i>Sisymbrella dentata</i> (L.) O.E.Schulz                              | Yes            | Brassicaceae <sup>j</sup> | E                         | 32                   | – <sup>p</sup>   | – <sup>q</sup>               | 352                    | 0.4     | 0.7     | 1.4     | 599                        | O                           | L                               | FC:PI                |
| 1947a                     | <i>Sisymbrium austriacum</i> Jacq.                                      | Yes            | Brassicaceae <sup>j</sup> | E                         | 14                   | 2                | – <sup>q</sup>               | 352                    | 0.4     | 0.7     | 1.4     | 599                        | O                           | L                               | FC:PI                |
| 1948a                     | <i>Sisymbrium irio</i> L.                                               | – <sup>m</sup> | Brassicaceae <sup>j</sup> | E                         | 28                   | 4                | – <sup>q</sup>               | 521                    | 0.5     | 1.1     | 2.1     | 509                        | O                           | – <sup>w</sup>                  | FC:PI                |
| 1949a                     | <i>Sisymbrium officinale</i> L.                                         | Yes            | Brassicaceae <sup>j</sup> | E                         | 14                   | 2                | – <sup>q</sup>               | 235                    | 0.2     | 0.5     | 1.0     | 599                        | O                           | L                               | FC:PI                |
| 1950a                     | <i>Sisymbrium orientale</i> L.                                          | – <sup>m</sup> | Brassicaceae <sup>j</sup> | E                         | 14                   | – <sup>p</sup>   | – <sup>q</sup>               | 305                    | 0.3     | 0.6     | 1.2     | 509                        | O                           | – <sup>w</sup>                  | FC:PI                |
| 1951a                     | <i>Sonchus acaulis</i> Dum.-Cours.                                      | – <sup>m</sup> | Asteraceae <sup>j</sup>   | E                         | 18 <sup>o</sup>      | 2                | P                            | 1,399                  | 1.4     | 2.9     | 5.7     | 477                        | O                           | <i>Solan.</i> <sup>c</sup>      | FC:PI                |
| 1952a                     | <i>Sonchus canariensis</i> (Sch. Bip.) Boulos subsp. <i>canariensis</i> | – <sup>m</sup> | Asteraceae <sup>j</sup>   | E                         | 18 <sup>o</sup>      | 2                | P                            | 1,403                  | 1.4     | 2.9     | 5.7     | 552                        | O                           | <i>Solan.</i> <sup>c</sup>      | FC:PI                |
| 1953a                     | <i>Sonchus capillaris</i> Svent.                                        | – <sup>m</sup> | Asteraceae <sup>j</sup>   | E                         | 18                   | 2                | P                            | 1,447                  | 1.5     | 3.0     | 5.9     | 552                        | O                           | <i>Solan.</i> <sup>c</sup>      | FC:PI                |
| 1954a                     | <i>Sonchus congestus</i> Willd.                                         | – <sup>m</sup> | Asteraceae <sup>j</sup>   | E                         | 18 <sup>o</sup>      | 2                | P                            | 1,403                  | 1.4     | 2.9     | 5.7     | 477                        | O                           | <i>Solan.</i> <sup>c</sup>      | FC:PI                |
| 1955a                     | <i>Sonchus fauces-orci</i> Knoche                                       | – <sup>m</sup> | Asteraceae <sup>j</sup>   | E                         | – <sup>n</sup>       | (2)              | P                            | 1,658                  | 1.7     | 3.4     | 6.8     | 552                        | O                           | <i>Solan.</i> <sup>c</sup>      | FC:PI                |

|       |                                                                                |                |                         |   |                 |                |   |       |     |      |      |                   |   |                                  |       |
|-------|--------------------------------------------------------------------------------|----------------|-------------------------|---|-----------------|----------------|---|-------|-----|------|------|-------------------|---|----------------------------------|-------|
| 1956a | <i>Sonchus gummiifer</i> Link <sup>i</sup>                                     | – <sup>m</sup> | Asteraceae <sup>j</sup> | E | 18 <sup>o</sup> | 2              | P | 1,320 | 1.4 | 2.7  | 5.4  | 552               | O | <i>Solan.</i> <sup>c</sup>       | FC:PI |
| 1957a | <i>Sonchus hierrensis</i> (Pit.)<br>Boulos var.<br><i>benehoavensis</i> Svent. | – <sup>m</sup> | Asteraceae <sup>j</sup> | E | 18 <sup>o</sup> | 2              | P | 1,345 | 1.4 | 2.8  | 5.5  | 552               | O | <i>Solan.</i> <sup>c</sup>       | FC:PI |
| 1958a | <i>Sonchus leptocephalus</i><br>Cass                                           | Yes            | Asteraceae <sup>j</sup> | E | 18 <sup>o</sup> | 2              | P | 1,438 | 1.5 | 2.9  | 5.9  | 522               | O | <i>Solan.</i> <sup>c</sup>       | FC:PI |
| 1959a | <i>Sonchus radicans</i> Ait.                                                   | – <sup>m</sup> | Asteraceae <sup>j</sup> | E | 18              | 2              | P | 1,281 | 1.3 | 2.6  | 5.2  | 477               | O | <i>Solan.</i> <sup>c</sup>       | FC:PI |
| 1960a | <i>Sophora japonica</i> L.                                                     | No             | Fabaceae <sup>j</sup>   | E | – <sup>n</sup>  | – <sup>p</sup> | P | 655   | 0.7 | 1.3  | 2.7  | 492               | O | <i>Glycine</i> <sup>c</sup>      | FC:PI |
| 1961a | <i>Sophora mollis</i> Graham &<br>Baker                                        | No             | Fabaceae <sup>j</sup>   | E | 18 <sup>o</sup> | 2              | P | 1,995 | 2.0 | 4.1  | 8.2  | 501 <sup>ab</sup> | O | B <sup>c</sup>                   | Fe    |
| 1962a | <i>Sorbus aucuparia</i> L.                                                     | Yes            | Rosaceae                | E | – <sup>n</sup>  | – <sup>p</sup> | P | 636   | 0.7 | 1.3  | 2.6  | 489               | O | – <sup>w</sup>                   | FC:EB |
| 1963a | <i>Sorghum amplum</i><br>Lazarides                                             | Yes            | Poaceae <sup>j</sup>    | M | 30              | – <sup>p</sup> | A | 3,760 | 3.8 | 7.7  | 15.4 | 511               | O | <i>Lupinus tex.</i> <sup>c</sup> | FC:PI |
| 1964a | <i>Sorghum angustum</i><br>S.T.Blake                                           | Yes            | Poaceae <sup>j</sup>    | M | 10              | – <sup>p</sup> | A | 1,809 | 1.9 | 3.7  | 7.4  | 511               | O | <i>Lupinus tex.</i> <sup>c</sup> | FC:PI |
| 1965k | <i>Sorghum bicolor</i> (L.)<br>Moench line Tx623                               | No             | Poaceae <sup>j</sup>    | M | 20              | 2              | A | 817   | 0.8 | 1.7  | 3.3  | 511               | O | <i>Lupinus tex.</i> <sup>c</sup> | FC:PI |
| 1965l | <i>Sorghum bicolor</i> (L.)<br>Moench line Pioneer<br>8695                     | No             | Poaceae <sup>j</sup>    | M | 20              | 2              | A | 817   | 0.8 | 1.7  | 3.3  | 511               | O | <i>Lupinus tex.</i> <sup>c</sup> | FC:PI |
| 1965m | <i>Sorghum bicolor</i> (L.)<br>Moench genotype<br>BTx623                       | No             | Poaceae                 | M | 20 <sup>o</sup> | 2              | A | 729   | 0.7 | 1.5  | 3.0  | 614               | O | – <sup>ax</sup>                  | GS    |
| 1966a | <i>Sorghum brachypodum</i><br>Lazarides                                        | Yes            | Poaceae <sup>j</sup>    | M | 10              | – <sup>p</sup> | A | 1,643 | 1.7 | 3.4  | 6.7  | 511               | O | <i>Lupinus tex.</i> <sup>c</sup> | FC:PI |
| 1967a | <i>Sorghum bulbosum</i><br>Lazarides                                           | Yes            | Poaceae <sup>j</sup>    | M | 10              | – <sup>p</sup> | A | 1,125 | 1.2 | 2.3  | 4.6  | 511               | O | L                                | FC:PI |
| 1968a | <i>Sorghum ecarinatum</i><br>Lazarides                                         | Yes            | Poaceae <sup>j</sup>    | M | 10              | – <sup>p</sup> | A | 1,027 | 1.1 | 2.1  | 4.2  | 511               | O | L                                | FC:PI |
| 1969a | <i>Sorghum exstans</i><br>Lazarides                                            | Yes            | Poaceae <sup>j</sup>    | M | 10              | – <sup>p</sup> | A | 1,345 | 1.4 | 2.8  | 5.5  | 511               | O | <i>Lupinus tex.</i> <sup>c</sup> | FC:PI |
| 1970b | <i>Sorghum halepense</i> (L.)<br>Pers. <sup>1</sup>                            | No             | Poaceae <sup>j</sup>    | M | 40              | – <sup>p</sup> | P | 1,604 | 1.6 | 3.3  | 6.6  | 511               | O | <i>Lupinus tex.</i> <sup>c</sup> | FC:PI |
| 1971a | <i>Sorghum interjectum</i><br>Lazarides                                        | Yes            | Poaceae <sup>j</sup>    | M | 30              | – <sup>p</sup> | P | 3,565 | 3.6 | 7.3  | 14.6 | 511               | O | <i>Sorghum</i> <sup>c</sup>      | FC:PI |
| 1972a | <i>Sorghum intrans</i> F.Muell.<br>ex Benth.                                   | Yes            | Poaceae <sup>j</sup>    | M | 10              | – <sup>p</sup> | A | 1,115 | 1.1 | 2.3  | 4.6  | 511               | O | L                                | FC:PI |
| 1973a | <i>Sorghum laxiflorum</i><br>Bailey                                            | Yes            | Poaceae <sup>j</sup>    | M | 40              | – <sup>p</sup> | A | 1,218 | 1.2 | 2.5  | 5.0  | 511               | O | L                                | FC:PI |
| 1974a | <i>Sorghum leiocladum</i><br>(Hack.) C.E.Hubb.                                 | Yes            | Poaceae <sup>j</sup>    | M | 10              | – <sup>p</sup> | P | 2,249 | 2.3 | 4.6  | 9.2  | 511               | O | <i>Lupinus tex.</i> <sup>c</sup> | FC:PI |
| 1975a | <i>Sorghum macrospermum</i><br>Garber                                          | Yes            | Poaceae <sup>j</sup>    | M | 40              | – <sup>p</sup> | A | 1,012 | 1.0 | 2.1  | 4.1  | 511               | O | L                                | FC:PI |
| 1976a | <i>Sorghum matarankense</i><br>Garber & Snyder                                 | Yes            | Poaceae <sup>j</sup>    | M | 10              | – <sup>p</sup> | A | 1,227 | 1.3 | 2.5  | 5.0  | 511               | O | L                                | FC:PI |
| 1977a | <i>Sorghum nitidum</i> (Vahl.)<br>Pers.                                        | Yes            | Poaceae <sup>j</sup>    | M | 20              | – <sup>p</sup> | P | 4,298 | 4.4 | 8.8  | 17.6 | 511               | O | <i>Lupinus tex.</i> <sup>c</sup> | FC:PI |
| 1978a | <i>Sorghum plumosum</i><br>(R.Br.) P.Beauv.                                    | Yes            | Poaceae <sup>j</sup>    | M | 30              | – <sup>p</sup> | P | 3,741 | 3.8 | 7.7  | 15.3 | 511               | O | <i>Lupinus tex.</i> <sup>c</sup> | FC:PI |
| 1979a | <i>Sorghum plumosum</i><br>(R.Br.) P.Beauv.                                    | Yes            | Poaceae <sup>j</sup>    | M | 40              | – <sup>p</sup> | P | 5,037 | 5.2 | 10.3 | 20.6 | 511               | O | <i>Sorghum</i> <sup>c</sup>      | FC:PI |
| 1980a | <i>Sorghum propinquum</i><br>(Kunth) Hitch.                                    | No             | Poaceae <sup>j</sup>    | M | 20              | – <sup>p</sup> | P | 743   | 0.8 | 1.5  | 3.0  | 511               | O | <i>Lupinus tex.</i> <sup>c</sup> | FC:PI |
| 1981a | <i>Sorghum</i><br><i>purpureosericeum</i><br>(A.Rich) Aschers &<br>Schweinf    | Yes            | Poaceae <sup>j</sup>    | M | 10              | – <sup>p</sup> | A | 2,044 | 2.1 | 4.2  | 8.4  | 511               | O | <i>Lupinus tex.</i>              | FC:PI |

| Entry number <sup>e</sup> | Species                                                             | Voucher        | Family                     | Higher group <sup>f</sup> | 2n <sup>‡</sup>        | Ploidy level (x) | Life cycle type <sup>g</sup> | DNA amount             |         |         |         | Original ref. <sup>3</sup> | Present amount <sup>†</sup> | Standard species <sup>*b1</sup>  | Method <sup>††</sup> |
|---------------------------|---------------------------------------------------------------------|----------------|----------------------------|---------------------------|------------------------|------------------|------------------------------|------------------------|---------|---------|---------|----------------------------|-----------------------------|----------------------------------|----------------------|
|                           |                                                                     |                |                            |                           |                        |                  |                              | 1C (Mbp <sup>s</sup> ) | 1C (pg) | 2C (pg) | 4C (pg) |                            |                             |                                  |                      |
| 1982a                     | <i>Sorghum stipoides</i> (Ewart & Jean White) C.Gardner & C.E.Hubb. | Yes            | Poaceae <sup>j</sup>       | M                         | 10                     | – <sup>p</sup>   | A                            | 1,071                  | 1.1     | 2.2     | 4.4     | 511                        | O                           | L                                | FC:PI                |
| 1983a                     | <i>Sorghum timorense</i> (Kunth) Buse                               | Yes            | Poaceae <sup>j</sup>       | M                         | 10                     | – <sup>p</sup>   | A                            | 621                    | 0.6     | 1.3     | 2.5     | 511                        | O                           | <i>Sorghum</i> <sup>c</sup>      | FC:PI                |
| 1984b                     | <i>Sorghum versicolor</i> Anderss.                                  | No             | Poaceae <sup>j</sup>       | M                         | 10                     | 2                | A                            | 1,589                  | 1.6     | 3.3     | 6.5     | 511                        | O                           | <i>Sorghum</i> <sup>c</sup>      | FC:PI                |
| 1985a                     | <i>Sorghum versicolor</i> Anderss.                                  | No             | Poaceae <sup>j</sup>       | M                         | 20                     | 4                | A                            | 3,262                  | 3.3     | 6.7     | 13.3    | 511                        | O                           | <i>Lupinus tex.</i> <sup>c</sup> | FC:PI                |
| 1986a                     | <i>Spartocytisus filipes</i> Webb & Berthel.                        | – <sup>m</sup> | Fabaceae <sup>j</sup>      | E                         | 48 <sup>o</sup>        | 4                | P                            | 1,125                  | 1.2     | 2.3     | 4.6     | 552                        | O                           | <i>Glycine</i> <sup>e</sup>      | FC:PI                |
| 1987a                     | <i>Spartocytisus supranubius</i> (L.f.) Christ ex G.Kunkel          | – <sup>m</sup> | Fabaceae <sup>j</sup>      | E                         | 48 + 0-4B <sup>o</sup> | 4                | P                            | 1,090                  | 1.1     | 2.2     | 4.5     | 552                        | O                           | <i>Glycine</i> <sup>e</sup>      | FC:PI                |
| 1988d                     | <i>Spinacia oleracea</i> L.                                         | No             | Amaranthaceae <sup>k</sup> | E                         | – <sup>n</sup>         | – <sup>p</sup>   | A                            | 1,315                  | 1.3     | 2.7     | 5.4     | 492                        | O                           | <i>Raphanus</i> <sup>c</sup>     | FC:PI                |
| 1989a                     | <i>Spinifex sericeus</i> R.Br.                                      | Yes            | Poaceae <sup>j</sup>       | M                         | 18                     | 2                | P                            | 2,645                  | 2.7     | 5.4     | 10.8    | 528                        | O                           | – <sup>w</sup>                   | FC:PI                |
| 1990a                     | <i>Stachys grandiflora</i> (Willd.) Benth.                          | No             | Lamiaceae <sup>j</sup>     | E                         | – <sup>n</sup>         | – <sup>p</sup>   | P                            | 6,098                  | 6.2     | 12.5    | 24.9    | 492                        | O                           | G <sup>c</sup>                   | FC:PI                |
| 1991a                     | <i>Stachyurus praecox</i> Siebold & Zucc.                           | No             | Stachyuraceae              | E                         | 24                     | – <sup>p</sup>   | P                            | 347                    | 0.4     | 0.7     | 1.4     | 612                        | O                           | J                                | Fe                   |
| 1992a                     | <i>Staehelina dubia</i> L.                                          | Yes            | Asteraceae <sup>j</sup>    | E                         | 30                     | 2                | P                            | 768                    | 0.8     | 1.6     | 3.1     | 502                        | O                           | <i>Petunia</i> <sup>c</sup>      | FC:PI                |
| 1993a                     | <i>Staehelina fruticosa</i> (L.) L.                                 | Yes            | Asteraceae <sup>j</sup>    | E                         | 34                     | 2                | P                            | 1,081                  | 1.1     | 2.2     | 4.4     | 502                        | O                           | <i>Petunia</i> <sup>c</sup>      | FC:PI                |
| 1994a                     | <i>Staehelina petiolata</i> (L.) Hilliard & B.L.Burt                | Yes            | Asteraceae <sup>j</sup>    | E                         | 34                     | 2                | P                            | 729                    | 0.7     | 1.5     | 3.0     | 502                        | O                           | <i>Petunia</i> <sup>c</sup>      | FC:PI                |
| 1995a                     | <i>Stahlianthus involucratus</i> (King ex Baker) Craib ex Loes.     | Yes            | Zingiberaceae              | M                         | 22 <sup>o</sup>        | 2                | P                            | 1,521                  | 1.6     | 3.1     | 6.2     | 562                        | O                           | <i>Glycine</i> <sup>e</sup>      | FC:PI                |
| 1996a                     | <i>Staphylea bumalda</i> DC.                                        | No             | Staphyleaceae              | E                         | 26                     | – <sup>p</sup>   | P                            | 1,677                  | 1.7     | 3.4     | 6.9     | 612                        | O                           | J                                | Fe                   |
| 1997a                     | <i>Stemmacantha cynaroides</i> (C.Sm. in Buch) Dittrich             | – <sup>m</sup> | Asteraceae <sup>j</sup>    | E                         | – <sup>n</sup>         | – <sup>p</sup>   | P                            | 1,051                  | 1.1     | 2.2     | 4.3     | 552                        | O                           | <i>Glycine</i> <sup>e</sup>      | FC:PI                |
| 1998a                     | <i>Stenostachys deceptorix</i> Connor                               | Yes            | Poaceae <sup>j</sup>       | M                         | 28                     | 4                | P                            | 9,496                  | 9.7     | 19.4    | 38.8    | 528                        | O                           | – <sup>w</sup>                   | FC:PI                |
| 1999a                     | <i>Stenostachys gracilis</i> (Hook.f.) Connor                       | Yes            | Poaceae <sup>j</sup>       | M                         | 28                     | 4                | P                            | 8,758                  | 9.0     | 17.9    | 35.8    | 528                        | O                           | – <sup>w</sup>                   | FC:PI                |
| 2000a                     | <i>Stenostachys laevis</i> (Petrie) Connor                          | Yes            | Poaceae <sup>j</sup>       | M                         | 28                     | 4                | P                            | 9,208                  | 9.4     | 18.8    | 37.7    | 528                        | O                           | – <sup>w</sup>                   | FC:PI                |
| 2001a                     | <i>Streptanthus polygaloides</i> A.Gray <sup>i</sup>                | Yes            | Brassicaceae <sup>j</sup>  | E                         | 28                     | 2                | B                            | 675                    | 0.7     | 1.4     | 2.8     | 540                        | O                           | <i>Raphanus</i> <sup>c</sup>     | FC:PI                |
| 2002a                     | <i>Streptopus amplexifolius</i> (L.) DC.                            | Yes            | Liliaceae                  | M                         | – <sup>n</sup>         | – <sup>p</sup>   | P                            | 6,406                  | 6.6     | 13.1    | 26.2    | 565                        | O                           | G                                | FC:PI                |
| 2003a                     | <i>Strychnos nux-vomica</i> L.                                      | Yes            | Loganiaceae                | E                         | – <sup>n</sup>         | – <sup>p</sup>   | P                            | 418                    | 0.4     | 0.9     | 1.7     | 612                        | O                           | <i>Solan.</i> <sup>c</sup>       | FC:PI                |
| 2004a                     | <i>Suaeda maritima</i> (L.) Dum.                                    | Yes            | Amaranthaceae              | E                         | 36 <sup>o</sup>        | 4                | A                            | 1,032                  | 1.1     | 2.1     | 4.2     | 580                        | O                           | G <sup>c</sup>                   | CIA                  |
| 2005a                     | <i>Syrenia cuspidata</i> (M.Bieb.) Rchb.                            | Yes            | Brassicaceae <sup>j</sup>  | E                         | – <sup>n</sup>         | – <sup>p</sup>   | – <sup>q</sup>               | 411                    | 0.4     | 0.8     | 1.7     | 599                        | O                           | L                                | FC:PI                |
| 2006a                     | <i>Syzygium cumini</i> L. Skeels                                    | No             | Myrtaceae                  | E                         | 22 <sup>o</sup>        | 2                | P                            | 1,785                  | 1.8     | 3.7     | 7.3     | 501 <sup>ag</sup>          | O                           | B <sup>c</sup>                   | Fe                   |

|       |                                                                                       |                 |                           |   |                 |                |                |                |                |     |      |                   |   |                              |       |
|-------|---------------------------------------------------------------------------------------|-----------------|---------------------------|---|-----------------|----------------|----------------|----------------|----------------|-----|------|-------------------|---|------------------------------|-------|
| 2007a | <i>Tabebuia palmeri</i> Rose                                                          | No <sup>m</sup> | Bignoniaceae              | E | – <sup>n</sup>  | – <sup>p</sup> | P              | 1,186          | 1.2            | 2.4 | 4.9  | 501 <sup>ag</sup> | O | B <sup>c</sup>               | Fe    |
| 2008a | <i>Tamarix africana</i> <sup>1</sup>                                                  | No              | Tamaricaceae              | E | – <sup>n</sup>  | – <sup>p</sup> | P              | 1,614          | 1.7            | 3.3 | 6.6  | 563               | O | H <sup>c</sup>               | FC:PI |
| 2009a | <i>Tanacetopsis goloskokovii</i> (Poljakov) Karmysch.                                 | Yes             | Asteraceae <sup>j</sup>   | E | 18              | 2              | P              | 4,758          | 4.9            | 9.7 | 19.5 | 521               | O | <i>Petunia</i> <sup>e</sup>  | FC:PI |
| 2010a | <i>Taraxacum albidum</i> Dahlst.                                                      | Yes             | Asteraceae <sup>j</sup>   | E | 32              | 4              | P              | 3,379          | 3.5            | 6.9 | 13.8 | 514               | O | H <sup>c</sup>               | FC:PI |
| 2011a | <i>Taraxacum bessarabicum</i> (Hornem.) Hand.-Mazz.                                   | Yes             | Asteraceae <sup>j</sup>   | E | 16              | 2              | P              | 1,086          | 1.1            | 2.2 | 4.4  | 514               | O | H <sup>c</sup>               | FC:PI |
| 2012a | <i>Taraxacum brachyglossum</i> Dahlst.                                                | Yes             | Asteraceae <sup>j</sup>   | E | 24              | 3 <sup>z</sup> | P              | – <sup>t</sup> | – <sup>t</sup> | 2.6 | 5.2  | 514               | O | H <sup>c</sup>               | FC:PI |
| 2013a | <i>Taraxacum fartoris</i> Kirschner & Štěpánek                                        | Yes             | Asteraceae <sup>j</sup>   | E | 32              | 4              | P              | 1,804          | 1.8            | 3.7 | 7.4  | 514               | O | H <sup>c</sup>               | FC:PI |
| 2014a | <i>Taraxacum glaciale</i> É.Huet & A.Huet ex Hand.-Mazz.                              | Yes             | Asteraceae <sup>j</sup>   | E | 16              | 2              | P              | 939            | 1.0            | 1.9 | 3.8  | 514               | O | H <sup>c</sup>               | FC:PI |
| 2015a | <i>Taraxacum linearisquamum</i> Soest                                                 | Yes             | Asteraceae <sup>j</sup>   | E | 16              | 2              | P              | 866            | 0.9            | 1.8 | 3.5  | 514               | O | H <sup>c</sup>               | FC:PI |
| 2016a | <i>Taraxacum obovatum</i> (Willd.) DC.                                                | Yes             | Asteraceae <sup>j</sup>   | E | 32              | 4              | P              | 2,318          | 2.4            | 4.7 | 9.5  | 514               | O | H <sup>c</sup>               | FC:PI |
| 2017a | <i>Taraxacum paludosum</i> (Scop.) Schltr.                                            | Yes             | Asteraceae <sup>j</sup>   | E | 32              | 4              | P              | 1,976          | 2.0            | 4.0 | 8.1  | 514               | O | H <sup>c</sup>               | FC:PI |
| 2018a | <i>Taraxacum serotinum</i> (Waldst. & Kit.) Poir.                                     | Yes             | Asteraceae <sup>j</sup>   | E | 16              | 2              | P              | 1,394          | 1.4            | 2.9 | 5.7  | 514               | O | H <sup>c</sup>               | FC:PI |
| 2019a | <i>Taraxacum stenocephalum</i> Boiss & Kotschy                                        | Yes             | Asteraceae <sup>j</sup>   | E | 32              | 4              | P              | 2,005          | 2.1            | 4.1 | 8.2  | 514               | O | H <sup>c</sup>               | FC:PI |
| 2020a | <i>Taraxacum tenuifolium</i> (Hoppe & Hornsch.) W.D.J.Koch                            | Yes             | Asteraceae <sup>j</sup>   | E | 16              | 2              | P              | 1,110          | 1.1            | 2.3 | 4.5  | 514               | O | H <sup>c</sup>               | FC:PI |
| 2021a | <i>Tauscheria lasiocarpa</i> Fisch. ex DC.                                            | Yes             | Brassicaceae <sup>j</sup> | E | 14              | 2              | – <sup>q</sup> | 313            | 0.3            | 0.6 | 1.3  | 599               | O | L                            | FC:PI |
| 2022a | <i>Teesdalia nudicalis</i> (L.) R.Br.                                                 | Yes             | Brassicaceae <sup>j</sup> | E | 36              | – <sup>p</sup> | – <sup>q</sup> | 597            | 0.6            | 1.2 | 2.4  | 599               | O | L                            | FC:PI |
| 2023a | <i>Teline canariensis</i> (L.) Webb. & Berth.                                         | – <sup>m</sup>  | Fabaceae <sup>j</sup>     | E | 48              | 4              | P              | 1,467          | 1.5            | 3.0 | 6.0  | 477               | O | <i>Glycine</i> <sup>e</sup>  | FC:PI |
| 2024a | <i>Teline osyroides</i> (Svent.) P.E.Gibbs & Dingwall subsp. <i>osyroides</i>         | – <sup>m</sup>  | Fabaceae <sup>j</sup>     | E | 48 <sup>o</sup> | 4              | P              | 1,007          | 1.0            | 2.1 | 4.1  | 552               | O | <i>Glycine</i> <sup>e</sup>  | FC:PI |
| 2025a | <i>Teline pallida</i> (Poir.) G.Kunkel subsp. <i>pallida</i>                          | – <sup>m</sup>  | Fabaceae <sup>j</sup>     | E | 48              | 4              | P              | 1,115          | 1.1            | 2.3 | 4.6  | 552               | O | <i>Glycine</i> <sup>e</sup>  | FC:PI |
| 2026a | <i>Teline stenopetala</i> (Webb & Berthel.) Webb & Berthel. subsp. <i>stenopetala</i> | – <sup>m</sup>  | Fabaceae <sup>j</sup>     | E | 48 <sup>o</sup> | 4              | P              | 998            | 1.0            | 2.0 | 4.1  | 552               | O | <i>Glycine</i> <sup>e</sup>  | FC:PI |
| 2027a | <i>Tetracme pamirica</i> Vass.                                                        | Yes             | Brassicaceae <sup>j</sup> | E | 28 <sup>o</sup> | – <sup>p</sup> | – <sup>q</sup> | 1,653          | 1.7            | 3.4 | 6.8  | 599               | O | L                            | FC:PI |
| 2028a | <i>Teucrium heterophyllum</i> L'Hér. subsp. <i>brevipilosum</i> M.von Gaisberg        | – <sup>m</sup>  | Lamiaceae <sup>j</sup>    | E | – <sup>n</sup>  | – <sup>p</sup> | P              | 1,120          | 1.1            | 2.3 | 4.6  | 552               | O | <i>Solan.</i> <sup>e</sup>   | FC:PI |
| 2029b | <i>Teucrium scorodonia</i> L.                                                         | Yes             | Lamiaceae <sup>j</sup>    | E | – <sup>n</sup>  | – <sup>p</sup> | P              | 1,399          | 1.4            | 2.9 | 5.7  | 492               | O | <i>Raphanus</i> <sup>e</sup> | FC:PI |
| 2030a | <i>Thellungiella</i> sp. <sup>1</sup>                                                 | Yes             | Brassicaceae <sup>j</sup> | E | 14              | 2              | – <sup>q</sup> | 313            | 0.3            | 0.6 | 1.3  | 599               | O | L                            | FC:PI |
| 2031c | <i>Thespesia populnea</i> (L.) Sol. ex Correa                                         | No              | Malvaceae                 | E | 26 <sup>o</sup> | 2              | P              | 3,249          | 3.3            | 6.6 | 13.3 | 501 <sup>ag</sup> | O | B <sup>c</sup>               | Fe    |

| Entry number <sup>e</sup> | Species                                                          | Voucher        | Family                     | Higher group <sup>#</sup> | 2n <sup>‡</sup> | Ploidy level (x) | Life cycle type <sup>§</sup> | DNA amount             |         |         |         | Original ref. <sup>a</sup> | Present amount <sup>†</sup> | Standard species <sup>*b1</sup> | Method <sup>††</sup> |
|---------------------------|------------------------------------------------------------------|----------------|----------------------------|---------------------------|-----------------|------------------|------------------------------|------------------------|---------|---------|---------|----------------------------|-----------------------------|---------------------------------|----------------------|
|                           |                                                                  |                |                            |                           |                 |                  |                              | 1C (Mbp <sup>s</sup> ) | 1C (pg) | 2C (pg) | 4C (pg) |                            |                             |                                 |                      |
| 2032a                     | <i>Thlaspi arvense</i> L.                                        | Yes            | Brassicaceae <sup>j</sup>  | E                         | 14              | 2                | – <sup>q</sup>               | 509                    | 0.5     | 1.0     | 2.1     | 599                        | O                           | L                               | FC:PI                |
| 2032b                     | <i>Thlaspi arvense</i> L.                                        | Yes            | Brassicaceae <sup>j</sup>  | E                         | 14 <sup>o</sup> | 2                | B                            | 533                    | 0.5     | 1.1     | 2.2     | 540                        | O                           | <i>Raphanus</i> <sup>e</sup>    | FC:PI                |
| 2032c                     | <i>Thlaspi arvense</i> L.                                        | – <sup>m</sup> | Brassicaceae <sup>j</sup>  | E                         | 14              | – <sup>p</sup>   | – <sup>q</sup>               | 536                    | 0.5     | 1.1     | 2.2     | 509                        | O                           | – <sup>w</sup>                  | FC:PI                |
| 2033a                     | <i>Thlaspi caerulescens</i><br>J.Presl & C.Presl <sup>1</sup>    | Yes            | Brassicaceae <sup>j</sup>  | E                         | 14              | 2                | B                            | 328                    | 0.3     | 0.7     | 1.3     | 540                        | O                           | <i>Raphanus</i> <sup>e</sup>    | FC:PI                |
| 2033b                     | <i>Thlaspi caerulescens</i><br>J.Presl & C.Presl <sup>1</sup>    | Yes            | Brassicaceae <sup>j</sup>  | E                         | 14 <sup>o</sup> | 2                | B                            | 342                    | 0.4     | 0.7     | 1.4     | 522                        | O                           | <i>Raphanus</i> <sup>e</sup>    | FC:PI                |
| 2034a                     | <i>Thlaspi ceratocarpum</i><br>(Pall.) Murray                    | Yes            | Brassicaceae <sup>j</sup>  | E                         | 14              | 2                | – <sup>q</sup>               | 421                    | 0.4     | 0.9     | 1.7     | 599                        | O                           | L                               | FC:PI                |
| 2035a                     | <i>Thlaspi goesingense</i><br>Halácsy                            | Yes            | Brassicaceae <sup>j</sup>  | E                         | 56 <sup>o</sup> | 8                | B                            | 978                    | 1.0     | 2.0     | 4.0     | 522                        | O                           | <i>Raphanus</i> <sup>e</sup>    | FC:PI                |
| 2036a                     | <i>Thlaspi montanum</i> var.<br><i>fendleri</i> <sup>1</sup>     | Yes            | Brassicaceae <sup>j</sup>  | E                         | 14 <sup>o</sup> | 2                | B                            | 284                    | 0.3     | 0.6     | 1.2     | 540                        | O                           | <i>Raphanus</i> <sup>e</sup>    | FC:PI                |
| 2036b                     | <i>Thlaspi montanum</i> var.<br><i>siskiyouense</i> <sup>1</sup> | Yes            | Brassicaceae <sup>j</sup>  | E                         | 14              | 2                | B                            | 303                    | 0.3     | 0.6     | 1.2     | 540                        | O                           | <i>Raphanus</i> <sup>e</sup>    | FC:PI                |
| 2036c                     | <i>Thlaspi montanum</i> var.<br><i>montanum</i> <sup>i,1</sup>   | Yes            | Brassicaceae <sup>j</sup>  | E                         | 14              | 2                | B                            | 308                    | 0.3     | 0.6     | 1.3     | 540                        | O                           | <i>Raphanus</i> <sup>e</sup>    | FC:PI                |
| 2037a                     | <i>Thlaspi oxyceras</i> (Boiss.)<br>Hedge <sup>1</sup>           | Yes            | Brassicaceae <sup>j</sup>  | E                         | – <sup>n</sup>  | – <sup>p</sup>   | AB                           | 328                    | 0.3     | 0.7     | 1.3     | 522                        | O                           | <i>Raphanus</i> <sup>e</sup>    | FC:PI                |
| 2038a                     | <i>Thlaspi perfoliatum</i> L.                                    | Yes            | Brassicaceae <sup>j</sup>  | E                         | 14              | 2                | B                            | 303                    | 0.3     | 0.6     | 1.2     | 540                        | O                           | <i>Raphanus</i> <sup>e</sup>    | FC:PI                |
| 2039a                     | <i>Thlaspi rosulare</i> Boiss.<br>& Bal. <sup>1</sup>            | Yes            | Brassicaceae <sup>j</sup>  | E                         | – <sup>n</sup>  | – <sup>p</sup>   | B                            | 313                    | 0.3     | 0.6     | 1.3     | 522                        | O                           | <i>Raphanus</i> <sup>e</sup>    | FC:PI                |
| 2040a                     | <i>Thlaspi tymphaeum</i><br>Hausskn.                             | Yes            | Brassicaceae <sup>j</sup>  | E                         | 14              | 2                | B                            | 308                    | 0.3     | 0.6     | 1.3     | 540                        | O                           | <i>Raphanus</i> <sup>e</sup>    | FC:PI                |
| 2041a                     | <i>Thlaspi tymphaeum</i><br>Hausskn.                             | Yes            | Brassicaceae <sup>j</sup>  | E                         | 28              | 4                | B                            | 641                    | 0.7     | 1.3     | 2.6     | 540                        | O                           | <i>Raphanus</i> <sup>e</sup>    | FC:PI                |
| 2042a                     | <i>Thlaspi violascens</i> Boiss.                                 | Yes            | Brassicaceae <sup>j</sup>  | E                         | – <sup>n</sup>  | – <sup>p</sup>   | A                            | 303                    | 0.3     | 0.6     | 1.2     | 522                        | O                           | <i>Raphanus</i> <sup>e</sup>    | FC:PI                |
| 2043a                     | <i>Thryallis angustifolia</i><br>(Benth.) Kuntze                 | No             | Malpighiaceae              | E                         | – <sup>n</sup>  | – <sup>p</sup>   | P                            | 3,800                  | 3.9     | 7.8     | 15.5    | 501 <sup>ag</sup>          | O                           | B <sup>c</sup>                  | Fe                   |
| 2044a                     | <i>Thryptomene saxicola</i> cv.<br>Payne <sup>1</sup>            | – <sup>m</sup> | Myrtaceae                  | E                         | – <sup>n</sup>  | – <sup>p</sup>   | – <sup>q</sup>               | 401                    | 0.4     | 0.8     | 1.6     | 526                        | O                           | A                               | FC:PI                |
| 2045a                     | <i>Thyridolepis mitchelliana</i><br>(Nees) S.T.Blake             | – <sup>m</sup> | Poaceae <sup>j</sup>       | M                         | – <sup>n</sup>  | – <sup>p</sup>   | BP                           | 689                    | 0.7     | 1.4     | 2.8     | 526                        | O                           | A                               | FC:PI                |
| 2046a                     | <i>Tinguarra cervariaefolia</i><br>(DC.) Parl.                   | – <sup>m</sup> | Apiaceae <sup>j</sup>      | E                         | 22 <sup>o</sup> | 2                | P                            | 1,183                  | 1.2     | 2.4     | 4.8     | 552                        | O                           | <i>Solan.</i> <sup>c</sup>      | FC:PI                |
| 2047a                     | <i>Tinguarra montana</i><br>(Webb ex Christ)<br>A.Hans. & Kunk.  | – <sup>m</sup> | Apiaceae <sup>j</sup>      | E                         | 22 <sup>o</sup> | 2                | P                            | 1,198                  | 1.2     | 2.5     | 4.9     | 477                        | O                           | <i>Solan.</i> <sup>c</sup>      | FC:PI                |
| 2048a                     | <i>Todaroa aurea</i> Parl.                                       | – <sup>m</sup> | Apiaceae <sup>j</sup>      | E                         | 22 <sup>o</sup> | 2                | P                            | 1,403                  | 1.4     | 2.9     | 5.7     | 477                        | O                           | <i>Solan.</i> <sup>c</sup>      | FC:PI                |
| 2049a                     | <i>Tolpis crassiuscula</i><br>Svent. <sup>1</sup>                | – <sup>m</sup> | Asteraceae <sup>j</sup>    | E                         | 18 <sup>o</sup> | 2                | P                            | 1,350                  | 1.4     | 2.8     | 5.5     | 552                        | O                           | <i>Solan.</i> <sup>c</sup>      | FC:PI                |
| 2050a                     | <i>Tolpis laciniata</i><br>(Sch. Bip. ex Webb &<br>Berth.) Webb  | – <sup>m</sup> | Asteraceae <sup>j</sup>    | E                         | 18 <sup>o</sup> | 2                | P                            | 1,301                  | 1.3     | 2.7     | 5.3     | 477                        | O                           | <i>Solan.</i> <sup>c</sup>      | FC:PI                |
| 2051a                     | <i>Tolpis lagopoda</i> C.Sm. in<br>Buch                          | – <sup>m</sup> | Asteraceae <sup>j</sup>    | E                         | 18 <sup>o</sup> | 2                | P                            | 1,389                  | 1.4     | 2.8     | 5.7     | 552                        | O                           | <i>Solan.</i> <sup>c</sup>      | FC:PI                |
| 2052a                     | <i>Tolpis webbii</i> Sch. Bip.<br>ex Webb & Berth.               | – <sup>m</sup> | Asteraceae <sup>j</sup>    | E                         | 18              | 2                | P                            | 1,345                  | 1.4     | 2.8     | 5.5     | 477                        | O                           | <i>Solan.</i> <sup>c</sup>      | FC:PI                |
| 2053a                     | <i>Torenia baillonii</i> Godefr                                  | No             | Linderniaceae <sup>k</sup> | E                         | 16              | 2                | AP                           | 166                    | 0.2     | 0.3     | 0.7     | 596                        | O                           | <i>Lotus</i> <sup>c</sup>       | FC:PI                |



|       |                                                                        |     |                            |   |                |                |                |       |     |      |      |                   |   |                               |         |
|-------|------------------------------------------------------------------------|-----|----------------------------|---|----------------|----------------|----------------|-------|-----|------|------|-------------------|---|-------------------------------|---------|
| 2054a | <i>Torenia fourmieri</i> Linden<br>cv. Common violet                   | No  | Linderniaceae <sup>k</sup> | E | 18             | 2              | AP             | 171   | 0.2 | 0.4  | 0.7  | 596               | O | <i>Lotus</i> <sup>c</sup>     | FC:PI   |
| 2055a | <i>Tragopogon dubius</i><br>Scopoli <sup>i</sup>                       | Yes | Asteraceae <sup>j</sup>    | E | 12             | 2              | AB             | 2,875 | 2.9 | 5.9  | 11.8 | 510               | O | G                             | Fe      |
| 2056a | <i>Tragopogon mirus</i><br>Ownbey <sup>i</sup>                         | Yes | Asteraceae <sup>j</sup>    | E | 24             | 4              | AB             | 5,110 | 5.2 | 10.5 | 20.9 | 510               | O | G                             | Fe      |
| 2056b | <i>Tragopogon mirus</i><br>Ownbey <sup>i</sup>                         | Yes | Asteraceae <sup>j</sup>    | E | 24             | 4              | AB             | 6,269 | 6.4 | 12.8 | 25.6 | 510               | O | G                             | Fe      |
| 2057a | <i>Tragopogon miscellus</i><br>Ownbey <sup>i</sup>                     | Yes | Asteraceae <sup>j</sup>    | E | 24             | 4              | AB             | 5,320 | 5.4 | 10.9 | 21.8 | 510               | O | G                             | Fe      |
| 2058a | <i>Tragopogon porrifolius</i><br>L.                                    | Yes | Asteraceae <sup>j</sup>    | E | 12             | 2              | AB             | 3,220 | 3.3 | 6.6  | 13.2 | 510               | O | G                             | Fe      |
| 2059a | <i>Tragopogon pratensis</i> L. <sup>i</sup>                            | Yes | Asteraceae <sup>j</sup>    | E | 12             | 2              | AB             | 2,709 | 2.8 | 5.5  | 11.1 | 510               | O | G                             | Fe      |
| 2059b | <i>Tragopogon pratensis</i> L. <sup>i</sup>                            | Yes | Asteraceae <sup>j</sup>    | E | 12             | 2              | AB             | 3,042 | 3.1 | 6.2  | 12.4 | 510               | O | G                             | Fe      |
| 2060a | <i>Trichocentrum ascendens</i><br>(Lindl.) M.W.Chase &<br>N.H.Williams | Yes | Orchidaceae                | M | – <sup>n</sup> | – <sup>p</sup> | P              | 1,663 | 1.7 | 3.4  | 6.8  | 504 <sup>ah</sup> | O | – <sup>w</sup>                | FC:DAPI |
| 2061b | <i>Trichocentrum</i><br><i>panamense</i> Rolfe                         | Yes | Orchidaceae                | M | – <sup>n</sup> | – <sup>p</sup> | P              | 4,205 | 4.3 | 8.6  | 17.2 | 504 <sup>ah</sup> | O | – <sup>w</sup>                | FC:DAPI |
| 2062b | <i>Trichopilia marginata</i><br>Henfrey                                | Yes | Orchidaceae                | M | – <sup>n</sup> | – <sup>p</sup> | P              | 2,738 | 2.8 | 5.6  | 11.2 | 504 <sup>ah</sup> | O | – <sup>w</sup>                | FC:DAPI |
| 2063a | <i>Trifolium africanum</i> Ser.                                        | No  | Fabaceae <sup>j</sup>      | E | 32             | 4              | – <sup>q</sup> | 2,245 | 2.3 | 4.6  | 9.2  | 534               | O | <i>Trifolium</i> <sup>c</sup> | FC:PI   |
| 2064a | <i>Trifolium alexandrinum</i><br>L.                                    | No  | Fabaceae <sup>j</sup>      | E | 16             | 2              | – <sup>q</sup> | 542   | 0.6 | 1.1  | 2.2  | 534               | O | <i>Trifolium</i> <sup>c</sup> | FC:PI   |
| 2065a | <i>Trifolium ambiguum</i><br>M.B.                                      | No  | Fabaceae <sup>j</sup>      | E | 48             | 6              | – <sup>q</sup> | 2,242 | 2.3 | 4.6  | 9.2  | 534               | O | <i>Trifolium</i> <sup>c</sup> | FC:PI   |
| 2066a | <i>Trifolium arvense</i> L.                                            | No  | Fabaceae <sup>j</sup>      | E | 14             | 2              | – <sup>q</sup> | 377   | 0.4 | 0.8  | 1.5  | 534               | O | <i>Trifolium</i> <sup>c</sup> | FC:PI   |
| 2067a | <i>Trifolium aureum</i> Poll.                                          | No  | Fabaceae <sup>j</sup>      | E | 16             | 2              | – <sup>q</sup> | 370   | 0.4 | 0.8  | 1.5  | 534               | O | <i>Trifolium</i> <sup>c</sup> | FC:PI   |
| 2068a | <i>Trifolium burchellianum</i><br>Ser.                                 | No  | Fabaceae <sup>j</sup>      | E | 48             | 6              | – <sup>q</sup> | 3,606 | 3.7 | 7.4  | 14.7 | 534               | O | <i>Trifolium</i> <sup>c</sup> | FC:PI   |
| 2069a | <i>Trifolium campestre</i><br>Schreb.                                  | No  | Fabaceae <sup>j</sup>      | E | 14             | 2              | – <sup>q</sup> | 363   | 0.4 | 0.7  | 1.5  | 534               | O | <i>Trifolium</i> <sup>c</sup> | FC:PI   |
| 2070a | <i>Trifolium dubium</i> Sibth.                                         | No  | Fabaceae <sup>j</sup>      | E | 28             | 4              | – <sup>q</sup> | 714   | 0.7 | 1.5  | 2.9  | 534               | O | <i>Trifolium</i> <sup>c</sup> | FC:PI   |
| 2071a | <i>Trifolium fragiferum</i> L.                                         | No  | Fabaceae <sup>j</sup>      | E | 16             | 2              | – <sup>q</sup> | 525   | 0.5 | 1.1  | 2.1  | 534               | O | <i>Trifolium</i> <sup>c</sup> | FC:PI   |
| 2072a | <i>Trifolium glomeratum</i> L.                                         | No  | Fabaceae <sup>j</sup>      | E | 16             | 2              | – <sup>q</sup> | 383   | 0.4 | 0.8  | 1.6  | 534               | O | <i>Trifolium</i> <sup>c</sup> | FC:PI   |
| 2073a | <i>Trifolium hirtum</i> All.                                           | No  | Fabaceae <sup>j</sup>      | E | 10             | 2              | – <sup>q</sup> | 669   | 0.7 | 1.4  | 2.7  | 534               | O | <i>Trifolium</i> <sup>c</sup> | FC:PI   |
| 2074a | <i>Trifolium hybridum</i> L.                                           | No  | Fabaceae <sup>j</sup>      | E | 16             | 2              | – <sup>q</sup> | 608   | 0.6 | 1.2  | 2.5  | 534               | O | <i>Trifolium</i> <sup>c</sup> | FC:PI   |
| 2075a | <i>Trifolium incarnatum</i> L.                                         | No  | Fabaceae <sup>j</sup>      | E | 14             | 2              | – <sup>q</sup> | 652   | 0.7 | 1.3  | 2.7  | 534               | O | <i>Trifolium</i> <sup>c</sup> | FC:PI   |
| 2076a | <i>Trifolium lappaceum</i> L.                                          | No  | Fabaceae <sup>j</sup>      | E | 16             | 2              | – <sup>q</sup> | 342   | 0.4 | 0.7  | 1.4  | 534               | O | <i>Trifolium</i> <sup>c</sup> | FC:PI   |
| 2077a | <i>Trifolium ligusticum</i><br>Balb. ex Loisel.                        | No  | Fabaceae <sup>j</sup>      | E | 12             | 2              | – <sup>q</sup> | 336   | 0.3 | 0.7  | 1.4  | 534               | O | <i>Trifolium</i> <sup>c</sup> | FC:PI   |
| 2078a | <i>Trifolium medium</i> L.                                             | No  | Fabaceae <sup>j</sup>      | E | 80             | 10             | – <sup>q</sup> | 3,154 | 3.2 | 6.5  | 12.9 | 534               | O | <i>Trifolium</i> <sup>c</sup> | FC:PI   |
| 2079a | <i>Trifolium michelianum</i><br>Savi                                   | No  | Fabaceae <sup>j</sup>      | E | 16             | 2              | – <sup>q</sup> | 640   | 0.7 | 1.3  | 2.6  | 534               | O | <i>Trifolium</i> <sup>c</sup> | FC:PI   |
| 2080a | <i>Trifolium nigrescens</i> Viv.                                       | No  | Fabaceae <sup>j</sup>      | E | 16             | 2              | – <sup>q</sup> | 385   | 0.4 | 0.8  | 1.6  | 534               | O | <i>Trifolium</i> <sup>c</sup> | FC:PI   |
| 2081a | <i>Trifolium polymorphum</i><br>Poir.                                  | No  | Fabaceae <sup>j</sup>      | E | 16             | 2              | – <sup>q</sup> | 1,002 | 1.0 | 2.1  | 4.1  | 534               | O | <i>Trifolium</i> <sup>c</sup> | FC:PI   |
| 2082a | <i>Trifolium pratense</i> L.                                           | No  | Fabaceae <sup>j</sup>      | E | 14             | 2              | – <sup>q</sup> | 418   | 0.4 | 0.9  | 1.7  | 534               | O | <i>Trifolium</i> <sup>c</sup> | FC:PI   |
| 2082b | <i>Trifolium pratense</i> L.                                           | Yes | Fabaceae <sup>j</sup>      | E | – <sup>n</sup> | – <sup>p</sup> | P              | 518   | 0.5 | 1.1  | 2.1  | 492               | O | <i>Glycine</i> <sup>c</sup>   | FC:PI   |
| 2083a | <i>Trifolium repens</i> L.                                             | No  | Fabaceae <sup>j</sup>      | E | 32             | 4              | A              | 1,093 | 1.1 | 2.2  | 4.5  | 534               | O | <i>Trifolium</i> <sup>c</sup> | FC:PI   |
| 2084a | <i>Trifolium resupinatum</i> L.                                        | No  | Fabaceae <sup>j</sup>      | E | 16             | 2              | – <sup>q</sup> | 508   | 0.5 | 1.0  | 2.1  | 534               | O | <i>Trifolium</i> <sup>c</sup> | FC:PI   |
| 2085a | <i>Trifolium rueppellianum</i><br>Fresen.                              | No  | Fabaceae <sup>j</sup>      | E | 16             | 2              | – <sup>q</sup> | 1,484 | 1.5 | 3.0  | 6.1  | 534               | O | <i>Trifolium</i> <sup>c</sup> | FC:PI   |
| 2086a | <i>Trifolium semipilosum</i><br>Fresen.                                | No  | Fabaceae <sup>j</sup>      | E | 16             | 2              | – <sup>q</sup> | 1,917 | 2.0 | 3.9  | 7.8  | 534               | O | <i>Trifolium</i> <sup>c</sup> | FC:PI   |

Continued

| Entry number <sup>g</sup> | Species                                                                               | Voucher | Family                  | Higher group <sup>#</sup> | 2n <sup>‡</sup> | Ploidy level (x) | Life cycle type <sup>§</sup> | DNA amount             |         |         |         | Original ref. <sup>a</sup> | Present amount <sup>†</sup> | Standard species <sup>*b1</sup> | Method <sup>††</sup> |
|---------------------------|---------------------------------------------------------------------------------------|---------|-------------------------|---------------------------|-----------------|------------------|------------------------------|------------------------|---------|---------|---------|----------------------------|-----------------------------|---------------------------------|----------------------|
|                           |                                                                                       |         |                         |                           |                 |                  |                              | 1C (Mbp <sup>s</sup> ) | 1C (pg) | 2C (pg) | 4C (pg) |                            |                             |                                 |                      |
| 2087a                     | <i>Trifolium striatum</i> L.                                                          | No      | Fabaceae <sup>j</sup>   | E                         | 14              | 2                | – <sup>q</sup>               | 372                    | 0.4     | 0.8     | 1.5     | 534                        | O                           | <i>Trifolium</i> <sup>e</sup>   | FC:PI                |
| 2088a                     | <i>Trifolium subterraneum</i> L.                                                      | No      | Fabaceae <sup>j</sup>   | E                         | 16              | 2                | – <sup>q</sup>               | 543                    | 0.6     | 1.1     | 2.2     | 534                        | O                           | <i>Trifolium</i> <sup>e</sup>   | FC:PI                |
| 2089b                     | <i>Trifolium tembense</i> Fresen.                                                     | No      | Fabaceae <sup>j</sup>   | E                         | 16              | 2                | – <sup>q</sup>               | 819                    | 0.8     | 1.7     | 3.3     | 534                        | O                           | <i>Trifolium</i> <sup>e</sup>   | FC:PI                |
| 2090a                     | <i>Trifolium tomentosum</i> L.                                                        | No      | Fabaceae <sup>j</sup>   | E                         | 16              | 2                | – <sup>q</sup>               | 508                    | 0.5     | 1.0     | 2.1     | 534                        | O                           | <i>Trifolium</i> <sup>e</sup>   | FC:PI                |
| 2091a                     | <i>Trifolium variegatum</i> Nutt.                                                     | No      | Fabaceae <sup>j</sup>   | E                         | 16              | 2                | – <sup>q</sup>               | 351                    | 0.4     | 0.7     | 1.4     | 534                        | O                           | <i>Trifolium</i> <sup>e</sup>   | FC:PI                |
| 2092a                     | <i>Trifolium vesiculosum</i> Savi                                                     | No      | Fabaceae <sup>j</sup>   | E                         | 16              | 2                | – <sup>q</sup>               | 663                    | 0.7     | 1.4     | 2.7     | 534                        | O                           | <i>Trifolium</i> <sup>e</sup>   | FC:PI                |
| 2093a                     | <i>Trifolium willdenovii</i> Spreng.                                                  | No      | Fabaceae <sup>j</sup>   | E                         | 16              | 2                | – <sup>q</sup>               | 433                    | 0.4     | 0.9     | 1.8     | 534                        | O                           | <i>Trifolium</i> <sup>e</sup>   | FC:PI                |
| 2094b                     | <i>Trillium camtschaticense</i> Ker Gawl.                                             | No      | Melanthiaceae           | M                         | – <sup>n</sup>  | – <sup>p</sup>   | P                            | 43,321                 | 44.3    | 88.6    | 177.2   | 518                        | O                           | B <sup>c</sup>                  | FC:PI                |
| 2095a                     | <i>Trillium × haagae</i> Miyabe & Tatew.                                              | No      | Melanthiaceae           | M                         | 30 <sup>o</sup> | 6                | P                            | 129,536                | 132.5   | 264.9   | 529.8   | 616                        | O                           | <i>Haem.</i> <sup>c</sup>       | FC:PI                |
| 2096a                     | <i>Tripleurospermum callosum</i> (Boiss. & Heldr.) E.Hossain <sup>h</sup>             | Yes     | Asteraceae <sup>j</sup> | E                         | 36 <sup>o</sup> | 4                | P                            | 3,902                  | 4.0     | 8.0     | 16.0    | 525                        | O                           | <i>Petunia</i> <sup>e</sup>     | FC:PI                |
| 2096b                     | <i>Tripleurospermum callosum</i> (Boiss. & Heldr.) E.Hossain <sup>h</sup>             | Yes     | Asteraceae <sup>j</sup> | E                         | 36              | 4                | P                            | 4,000                  | 4.1     | 8.2     | 16.4    | 525                        | O                           | <i>Petunia</i> <sup>e</sup>     | FC:PI                |
| 2097a                     | <i>Tripleurospermum elongatum</i> (Fischer & C.Mayer ex DC.) Bornm.                   | Yes     | Asteraceae <sup>j</sup> | E                         | 18 <sup>o</sup> | 2                | BP                           | 2,381                  | 2.4     | 4.9     | 9.7     | 525                        | O                           | <i>Petunia</i> <sup>e</sup>     | FC:PI                |
| 2098a                     | <i>Tripleurospermum maritimum</i> (L.) K.Koch                                         | Yes     | Asteraceae <sup>j</sup> | E                         | 36              | 4                | AB                           | 4,509                  | 4.6     | 9.2     | 18.4    | 525                        | O                           | <i>Petunia</i> <sup>e</sup>     | FC:PI                |
| 2098b                     | <i>Tripleurospermum maritimum</i> (L.) K.Koch                                         | Yes     | Asteraceae <sup>j</sup> | E                         | 18              | 2                | AB                           | 2,690                  | 2.8     | 5.5     | 11.0    | 525                        | O                           | <i>Petunia</i> <sup>e</sup>     | FC:PI                |
| 2099a                     | <i>Tripleurospermum melanolepis</i> (Boiss.) Rech. f.                                 | Yes     | Asteraceae <sup>j</sup> | E                         | 18 <sup>o</sup> | 2                | P                            | 2,386                  | 2.4     | 4.9     | 9.8     | 525                        | O                           | <i>Petunia</i> <sup>e</sup>     | FC:PI                |
| 2100a                     | <i>Tripleurospermum oreades</i> var. <i>oreades</i> (Boiss.) Rech. f. <sup>h</sup>    | Yes     | Asteraceae <sup>j</sup> | E                         | 36              | 4                | P                            | 4,284                  | 4.4     | 8.8     | 17.5    | 525                        | O                           | <i>Petunia</i> <sup>e</sup>     | FC:PI                |
| 2100b                     | <i>Tripleurospermum oreades</i> (Boiss.) Rech. f. var. <i>tchihatchewii</i> E.Hossain | Yes     | Asteraceae <sup>j</sup> | E                         | 36 <sup>o</sup> | 4                | P                            | 4,357                  | 4.5     | 8.9     | 17.8    | 525                        | O                           | <i>Petunia</i> <sup>e</sup>     | FC:PI                |
| 2100c                     | <i>Tripleurospermum oreades</i> (Boiss.) Rech. f. var. <i>oreades</i> <sup>h</sup>    | Yes     | Asteraceae <sup>j</sup> | E                         | 36              | 4                | P                            | 4,425                  | 4.5     | 9.1     | 18.1    | 525                        | O                           | <i>Petunia</i> <sup>e</sup>     | FC:PI                |
| 2101a                     | <i>Tripleurospermum repens</i> (Frey & Sint.) Bornm. <sup>h</sup>                     | Yes     | Asteraceae <sup>j</sup> | E                         | 36              | 4                | P                            | 4,068                  | 4.2     | 8.3     | 16.6    | 525                        | O                           | <i>Petunia</i> <sup>e</sup>     | FC:PI                |

|       |                                                                           |                  |                         |   |                 |                |   |        |      |      |      |     |   |                               |       |
|-------|---------------------------------------------------------------------------|------------------|-------------------------|---|-----------------|----------------|---|--------|------|------|------|-----|---|-------------------------------|-------|
| 2101b | <i>Tripleurospermum repens</i> (Frey & Sint.) Bornm. <sup>h</sup>         | Yes              | Asteraceae <sup>j</sup> | E | 36 <sup>o</sup> | 4              | P | 4,176  | 4-3  | 8-5  | 17-1 | 525 | O | <i>Petunia</i> <sup>c</sup>   | FC:PI |
| 2102a | <i>Tripleurospermum sevanense</i> (Manden.) Pobed. <sup>h</sup>           | Yes              | Asteraceae <sup>j</sup> | E | 36              | 4              | P | 4,039  | 4-1  | 8-3  | 16-5 | 525 | O | <i>Petunia</i> <sup>c</sup>   | FC:PI |
| 2102b | <i>Tripleurospermum sevanense</i> (Manden.) Pobed. <sup>h</sup>           | Yes              | Asteraceae <sup>j</sup> | E | 36              | 4              | P | 4,078  | 4-2  | 8-3  | 16-7 | 525 | O | <i>Petunia</i> <sup>c</sup>   | FC:PI |
| 2103a | <i>Trisetum</i> aff. <i>lepidum</i> <sup>l</sup>                          | Yes              | Poaceae <sup>j</sup>    | M | 28              | 4              | P | 8,323  | 8-5  | 17-0 | 34-0 | 528 | O | – <sup>w</sup>                | FC:PI |
| 2104a | <i>Trisetum antarcticum</i> (G.Frost) Trin.                               | Yes              | Poaceae <sup>j</sup>    | M | 28              | 4              | P | 3,521  | 3-6  | 7-2  | 14-4 | 476 | O | <i>Actinidia</i> <sup>c</sup> | FC:PI |
| 2105a | <i>Trisetum arduanum</i> Edgar & A.P.Druce                                | Yes              | Poaceae <sup>j</sup>    | M | 28              | 4              | P | 5,413  | 5-5  | 11-1 | 22-1 | 528 | O | – <sup>w</sup>                | FC:PI |
| 2105b | <i>Trisetum arduanum</i> Edgar & A.P.Druce                                | Yes              | Poaceae <sup>j</sup>    | M | 28              | 4              | P | 3,472  | 3-6  | 7-1  | 14-2 | 476 | O | <i>Actinidia</i> <sup>c</sup> | FC:PI |
| 2106a | <i>Trisetum drucei</i> Edgar                                              | Yes              | Poaceae <sup>j</sup>    | M | 28              | 4              | P | 5,560  | 5-7  | 11-4 | 22-7 | 528 | O | – <sup>w</sup>                | FC:PI |
| 2106b | <i>Trisetum drucei</i> Edgar                                              | Yes              | Poaceae <sup>j</sup>    | M | 28              | 4              | P | 3,912  | 4-0  | 8-0  | 16-0 | 476 | O | <i>Actinidia</i> <sup>c</sup> | FC:PI |
| 2107a | <i>Trisetum lepidum</i> Edgar & A.P.Druce                                 | Yes              | Poaceae <sup>j</sup>    | M | 28              | 4              | P | 8,166  | 8-4  | 16-7 | 33-4 | 528 | O | – <sup>w</sup>                | FC:PI |
| 2108a | <i>Trisetum serpentinum</i> Edgar & A.P.Druce                             | Yes              | Poaceae <sup>j</sup>    | M | 28              | 4              | P | 5,286  | 5-4  | 10-8 | 21-6 | 528 | O | – <sup>w</sup>                | FC:PI |
| 2108b | <i>Trisetum serpentinum</i> Edgar & A.P.Druce                             | Yes              | Poaceae <sup>j</sup>    | M | 28              | 4              | P | 3,521  | 3-6  | 7-2  | 14-4 | 476 | O | <i>Actinidia</i> <sup>c</sup> | FC:PI |
| 2109a | <i>Trisetum spicatum</i> (L.) K.Richt.                                    | Yes              | Poaceae <sup>j</sup>    | M | 28              | 4              | P | 4,802  | 4-9  | 9-8  | 19-6 | 528 | O | – <sup>w</sup>                | FC:PI |
| 2110a | <i>Trisetum tenellum</i> (Petrie) A.W.Hill                                | Yes              | Poaceae <sup>j</sup>    | M | 28              | 4              | P | 5,032  | 5-1  | 10-3 | 20-6 | 528 | O | – <sup>w</sup>                | FC:PI |
| 2111a | <i>Trisetum youngii</i> Hook.f.                                           | Yes              | Poaceae <sup>j</sup>    | M | 28              | 4              | P | 4,954  | 5-1  | 10-1 | 20-3 | 528 | O | – <sup>w</sup>                | FC:PI |
| 2112d | <i>Triticale</i> (hexaploid) line TPG 17-79 <sup>l</sup>                  | No               | Poaceae <sup>j</sup>    | M | – <sup>n</sup>  | 6              | A | 15,575 | 15-9 | 31-9 | 63-7 | 610 | C | A <sup>c</sup>                | Fe    |
| 2112e | <i>Triticale</i> (hexaploid) line TPG 17/3-79 <sup>l</sup>                | No               | Poaceae <sup>j</sup>    | M | – <sup>n</sup>  | 6              | A | 15,853 | 16-2 | 32-4 | 64-8 | 610 | C | A <sup>c</sup>                | Fe    |
| 2113b | <i>Triticale</i> (octoploid) line TPO 1/4-80 <sup>l</sup>                 | No               | Poaceae <sup>j</sup>    | M | – <sup>n</sup>  | 8              | A | 22,680 | 23-2 | 46-4 | 92-8 | 610 | C | A <sup>c</sup>                | Fe    |
| 2114r | <i>Triticum aestivum</i> L.                                               | Yes              | Poaceae <sup>j</sup>    | M | – <sup>n</sup>  | – <sup>p</sup> | A | 16,049 | 16-4 | 32-8 | 65-6 | 492 | O | C <sup>c</sup>                | FC:PI |
| 2114s | <i>Triticum aestivum</i> L. subsp. <i>aestivum</i> .                      | No <sup>m1</sup> | Poaceae <sup>j</sup>    | M | 42              | 6              | A | 17,281 | 17-7 | 35-3 | 70-7 | 604 | O | F <sup>c</sup>                | FC:PI |
| 2114t | <i>Triticum aestivum</i> L. subsp. <i>compactum</i> (Host) Mackey         | No <sup>m1</sup> | Poaceae <sup>j</sup>    | M | 42              | 6              | A | 17,389 | 17-8 | 35-6 | 71-1 | 604 | O | F <sup>c</sup>                | FC:PI |
| 2114u | <i>Triticum aestivum</i> L. subsp. <i>sphaerococcum</i> (Percival) Mackey | No <sup>m1</sup> | Poaceae <sup>j</sup>    | M | 42              | 6              | A | 17,594 | 18-0 | 36-0 | 72-0 | 604 | O | F <sup>c</sup>                | FC:PI |
| 2114v | <i>Triticum aestivum</i> L. subsp. <i>spelta</i> (L.) Thell.              | No <sup>m1</sup> | Poaceae <sup>j</sup>    | M | 42              | 6              | A | 17,330 | 17-7 | 35-4 | 70-9 | 604 | O | F <sup>c</sup>                | FC:PI |
| 2114w | <i>Triticum aestivum</i> L. subsp. <i>tibetanum</i> Shao                  | No <sup>m1</sup> | Poaceae <sup>j</sup>    | M | 42              | 6              | A | 18,504 | 18-9 | 37-8 | 75-7 | 604 | O | F <sup>c</sup>                | FC:PI |
| 2115a | <i>Triticum durum</i> Desf. cv. Kharkovskaya I                            | No               | Poaceae <sup>j</sup>    | M | 28 <sup>o</sup> | 4              | A | 12,377 | 12-7 | 25-3 | 50-6 | 610 | C | A <sup>c</sup>                | Fe    |
| 2116f | <i>Triticum monococcum</i> L. subsp. <i>aegilopoides</i>                  | No <sup>m1</sup> | Poaceae <sup>j</sup>    | M | 14              | 2              | A | 6,308  | 6-5  | 12-9 | 25-8 | 605 | O | F-2118p                       | FC:PI |

Continued

| Entry number <sup>g</sup> | Species                                                                                     | Voucher          | Family               | Higher group <sup>#</sup> | 2n <sup>‡</sup> | Ploidy level (x) | Life cycle type <sup>§</sup> | DNA amount             |                |         |         | Original ref. <sup>a</sup> | Present amount <sup>†</sup> | Standard species <sup>*b1</sup> | Method <sup>††</sup> |
|---------------------------|---------------------------------------------------------------------------------------------|------------------|----------------------|---------------------------|-----------------|------------------|------------------------------|------------------------|----------------|---------|---------|----------------------------|-----------------------------|---------------------------------|----------------------|
|                           |                                                                                             |                  |                      |                           |                 |                  |                              | 1C (Mbp <sup>s</sup> ) | 1C (pg)        | 2C (pg) | 4C (pg) |                            |                             |                                 |                      |
| 2116g                     | <i>Triticum monococcum</i><br>L. subsp. <i>monococcum</i>                                   | No <sup>m1</sup> | Poaceae <sup>j</sup> | M                         | 14              | 2                | A                            | 6,337                  | 6.5            | 13.0    | 25.9    | 605                        | O                           | F-2118p                         | FC:PI                |
| 2117c                     | <i>Triticum timopheevii</i><br>(Zhuk.) Zhuk. subsp. <i>armeniacum</i> (Jakubz) van Slageren | No <sup>m1</sup> | Poaceae <sup>j</sup> | M                         | 28              | 4                | A                            | 11,560                 | 11.8           | 23.6    | 47.3    | 604                        | O                           | F <sup>c</sup>                  | FC:PI                |
| 2117d                     | <i>Triticum timopheevii</i><br>(Zhuk.) Zhuk. subsp. <i>timopheevii</i>                      | No <sup>m1</sup> | Poaceae <sup>j</sup> | M                         | 28              | 4                | A                            | 11,609                 | 11.9           | 23.7    | 47.5    | 604                        | O                           | F <sup>c</sup>                  | FC:PI                |
| 2118g                     | <i>Triticum turgidum</i><br>L. subsp. <i>carthlicum</i>                                     | No               | Poaceae <sup>j</sup> | M                         | 28              | 4                | A                            | 11,560                 | 11.8           | 23.6    | 47.3    | 519                        | O                           | – <sup>w</sup>                  | FC:PI                |
| 2118h                     | <i>Triticum turgidum</i><br>L. subsp. <i>carthlicum</i> (Nevski) A.Löve & D.Löve            | No <sup>m1</sup> | Poaceae <sup>j</sup> | M                         | 28              | 4                | A                            | 12,587                 | 12.9           | 25.7    | 51.5    | 604                        | O                           | F <sup>c</sup>                  | FC:PI                |
| 2118i                     | <i>Triticum turgidum</i><br>L. subsp. <i>dicocoides</i> (Körn. Ex Asch. & Graebn.) Thell.   | No <sup>m1</sup> | Poaceae <sup>j</sup> | M                         | 28              | 4                | A                            | 12,626                 | 12.9           | 25.8    | 51.6    | 604                        | O                           | F <sup>c</sup>                  | FC:PI                |
| 2118j                     | <i>Triticum turgidum</i><br>L. subsp. <i>dicocoides</i>                                     | No               | Poaceae <sup>j</sup> | M                         | 28              | 4                | A                            | 11,721                 | 12.0           | 24.0    | 47.9    | 519                        | O                           | – <sup>w</sup>                  | FC:PI                |
| 2118k                     | <i>Triticum turgidum</i><br>L. subsp. <i>dicoccon</i> (Schrank) Thell.                      | No <sup>m1</sup> | Poaceae <sup>j</sup> | M                         | 28              | 4                | A                            | 12,587                 | 12.9           | 25.7    | 51.5    | 604                        | O                           | F <sup>c</sup>                  | FC:PI                |
| 2118l                     | <i>Triticum turgidum</i><br>L. subsp. <i>durum</i>                                          | No               | Poaceae <sup>j</sup> | M                         | 28              | 4                | A                            | 11,692                 | 12.0           | 23.9    | 47.8    | 519                        | O                           | – <sup>w</sup>                  | FC:PI                |
| 2118m                     | <i>Triticum turgidum</i><br>L. subsp. <i>durum</i> (Desf.) Husn.                            | No <sup>m1</sup> | Poaceae <sup>j</sup> | M                         | 28              | 4                | A                            | 12,558                 | 12.8           | 25.7    | 51.4    | 604                        | O                           | F <sup>c</sup>                  | FC:PI                |
| 2118n                     | <i>Triticum turgidum</i><br>L. subsp. <i>polonicum</i> (L.) Thell.                          | No <sup>m1</sup> | Poaceae <sup>j</sup> | M                         | 28              | 4                | A                            | 12,245                 | 12.5           | 25.0    | 50.1    | 604                        | O                           | F <sup>c</sup>                  | FC:PI                |
| 2118o                     | <i>Triticum turgidum</i><br>L. subsp. <i>turgidum</i>                                       | No <sup>m1</sup> | Poaceae <sup>j</sup> | M                         | 28              | 4                | A                            | 12,470                 | 12.8           | 25.5    | 51.0    | 604                        | O                           | F <sup>c</sup>                  | FC:PI                |
| 2118p                     | <i>Triticum turgidum</i><br>L. subsp. <i>durum</i> cv. Inbar                                | No               | Poaceae <sup>j</sup> | M                         | 28              | 4                | A                            | 12,421                 | 12.7           | 25.4    | 50.8    | 605                        | O                           | F <sup>c</sup>                  | FC:PI                |
| 2119c                     | <i>Triticum urartu</i><br>Thumanjan ex Gandilyan                                            | No               | Poaceae <sup>j</sup> | M                         | 14              | 2                | A                            | 5,751                  | 5.9            | 11.8    | 23.5    | 519                        | O                           | – <sup>w</sup>                  | FC:PI                |
| 2119d                     | <i>Triticum urartu</i><br>Tumanian ex Gandilyan                                             | No <sup>m1</sup> | Poaceae <sup>j</sup> | M                         | 14              | 2                | A                            | 5,888                  | 6.0            | 12.0    | 24.1    | 605                        | O                           | F-2118p                         | FC:PI                |
| 2120a                     | <i>Triticum zhukovskyi</i><br>Menabde & Ericz.                                              | No <sup>m1</sup> | Poaceae <sup>j</sup> | M                         | 42              | 6                | A                            | 17,350                 | 17.7           | 35.5    | 71.0    | 604                        | O                           | F <sup>c</sup>                  | FC:PI                |
| 2121a                     | <i>Tulipa aitchisonii</i> Hall<br>var. <i>clusianoides</i>                                  | Yes              | Liliaceae            | M                         | 36              | 3                | P                            | – <sup>t</sup>         | – <sup>t</sup> | 43.3    | 86.6    | 565                        | O                           | B                               | FC:PI                |
| 2122a                     | <i>Tulipa linifolia</i> Regel                                                               | Yes              | Liliaceae            | M                         | 24              | 2                | P                            | 14,059                 | 14.4           | 28.8    | 57.5    | 565                        | O                           | B                               | FC:PI                |
| 2123a                     | <i>Tulipa montana</i> Lindl.                                                                | Yes              | Liliaceae            | M                         | 24              | 2                | P                            | 14,792                 | 15.1           | 30.3    | 60.5    | 565                        | O                           | B                               | FC:PI                |

|       |                                                       |     |                           |   |                 |                |                |       |     |     |     |     |   |                      |       |
|-------|-------------------------------------------------------|-----|---------------------------|---|-----------------|----------------|----------------|-------|-----|-----|-----|-----|---|----------------------|-------|
| 2124a | <i>Turritis glabra</i> (L.)<br>Bernh.                 | Yes | Brassicaceae <sup>j</sup> | E | 12              | 2              | – <sup>q</sup> | 235   | 0.2 | 0.5 | 1.0 | 599 | O | L                    | FC:PI |
| 2125b | <i>Ulmus glabra</i> Hudson                            | No  | Ulmaceae                  | E | – <sup>n</sup>  | – <sup>p</sup> | P              | 2,137 | 2.2 | 4.4 | 8.7 | 585 | O | H <sup>c</sup>       | FC:PI |
| 2126a | <i>Ulmus minor</i> Mill.                              | No  | Ulmaceae                  | E | – <sup>n</sup>  | – <sup>p</sup> | P              | 2,078 | 2.1 | 4.3 | 8.5 | 585 | O | H <sup>c</sup>       | FC:PI |
| 2127b | <i>Urtica dioica</i> L.                               | Yes | Urticaceae                | E | – <sup>n</sup>  | – <sup>p</sup> | P              | 1,144 | 1.2 | 2.3 | 4.7 | 492 | O | G <sup>c</sup>       | FC:PI |
| 2128b | <i>Urtica urens</i> L.                                | No  | Urticaceae                | E | – <sup>n</sup>  | – <sup>p</sup> | A              | 523   | 0.5 | 1.1 | 2.1 | 492 | O | Glycine <sup>e</sup> | FC:PI |
| 2129a | <i>Utricularia australis</i><br>R.Br.                 | Yes | Lentibulariaceae          | E | – <sup>n</sup>  | – <sup>p</sup> | P              | 175   | 0.2 | 0.4 | 0.7 | 535 | O | G <sup>c</sup>       | CIA   |
| 2130a | <i>Utricularia blanchetii</i><br>A.DC.                | Yes | Lentibulariaceae          | E | – <sup>n</sup>  | – <sup>p</sup> | P              | 135   | 0.1 | 0.3 | 0.6 | 535 | O | G <sup>c</sup>       | CIA   |
| 2131a | <i>Utricularia gibba</i> L.                           | Yes | Lentibulariaceae          | E | – <sup>n</sup>  | – <sup>p</sup> | P              | 88    | 0.1 | 0.2 | 0.4 | 535 | O | G <sup>c</sup>       | CIA   |
| 2132a | <i>Utricularia humboldtii</i><br>R.H.Schomb.          | Yes | Lentibulariaceae          | E | – <sup>n</sup>  | – <sup>p</sup> | P              | 232   | 0.2 | 0.5 | 0.9 | 535 | O | G <sup>c</sup>       | CIA   |
| 2133a | <i>Utricularia livida</i> E.Mey.                      | Yes | Lentibulariaceae          | E | – <sup>n</sup>  | – <sup>p</sup> | P              | 252   | 0.3 | 0.5 | 1.0 | 535 | O | G <sup>c</sup>       | CIA   |
| 2134a | <i>Utricularia microcalyx</i><br>(P.Taylor) P.Taylor  | Yes | Lentibulariaceae          | E | – <sup>n</sup>  | – <sup>p</sup> | P              | 214   | 0.2 | 0.4 | 0.9 | 535 | O | G <sup>c</sup>       | CIA   |
| 2135a | <i>Utricularia parthenopipes</i><br>P.Taylor          | Yes | Lentibulariaceae          | E | – <sup>n</sup>  | – <sup>p</sup> | P              | 140   | 0.1 | 0.3 | 0.6 | 535 | O | G <sup>c</sup>       | CIA   |
| 2136a | <i>Utricularia praelonga</i><br>A.St.-Hil. & F.Girard | Yes | Lentibulariaceae          | E | – <sup>n</sup>  | – <sup>p</sup> | P              | 158   | 0.2 | 0.3 | 0.6 | 535 | O | G <sup>c</sup>       | CIA   |
| 2137a | <i>Utricularia prehensilis</i><br>E.Mey.              | Yes | Lentibulariaceae          | E | – <sup>n</sup>  | – <sup>p</sup> | P              | 401   | 0.4 | 0.8 | 1.6 | 535 | O | G <sup>c</sup>       | CIA   |
| 2138a | <i>Utricularia pubescens</i><br>Sm.                   | Yes | Lentibulariaceae          | E | – <sup>n</sup>  | – <sup>p</sup> | P              | 216   | 0.2 | 0.4 | 0.9 | 535 | O | G <sup>c</sup>       | CIA   |
| 2139a | <i>Utricularia quelchii</i><br>N.E.Br.                | Yes | Lentibulariaceae          | E | – <sup>n</sup>  | – <sup>p</sup> | P              | 157   | 0.2 | 0.3 | 0.6 | 535 | O | G <sup>c</sup>       | CIA   |
| 2140a | <i>Utricularia reniformis</i><br>A.St.-Hil.           | Yes | Lentibulariaceae          | E | – <sup>n</sup>  | – <sup>p</sup> | P              | 328   | 0.3 | 0.7 | 1.3 | 535 | O | G <sup>c</sup>       | CIA   |
| 2141a | <i>Utricularia sandersonii</i><br>Oliv.               | Yes | Lentibulariaceae          | E | – <sup>n</sup>  | – <sup>p</sup> | P              | 235   | 0.2 | 0.5 | 1.0 | 535 | O | G <sup>c</sup>       | CIA   |
| 2142a | <i>Utricularia subulata</i> L.                        | Yes | Lentibulariaceae          | E | – <sup>n</sup>  | – <sup>p</sup> | P              | 247   | 0.3 | 0.5 | 1.0 | 535 | O | G <sup>c</sup>       | CIA   |
| 2143a | <i>Vella pseudocytisus</i> L.                         | No  | Brassicaceae <sup>j</sup> | E | 68              | 4              | P              | 1,856 | 1.9 | 3.8 | 7.6 | 602 | O | Solan. <sup>c</sup>  | FC:PI |
| 2144a | <i>Vella spinosa</i> Boiss.                           | Yes | Brassicaceae <sup>j</sup> | E | 34              | – <sup>p</sup> | – <sup>q</sup> | 831   | 0.9 | 1.7 | 3.4 | 599 | O | L                    | FC:PI |
| 2145a | <i>Verbena rigida</i> Spreng.                         | Yes | Verbenaceae               | E | 42              | – <sup>p</sup> | A              | 1,161 | 1.2 | 2.4 | 4.8 | 612 | O | K                    | FC:PI |
| 2146a | <i>Veronica agrestis</i> L.                           | Yes | Plantaginaceae            | E | 28 <sup>o</sup> | 4              | A              | 714   | 0.7 | 1.5 | 2.9 | 478 | O | Glycine <sup>e</sup> | CIA   |
| 2147a | <i>Veronica anagallis-aquatica</i> L.                 | Yes | Plantaginaceae            | E | 36 <sup>o</sup> | 4              | P              | 1,056 | 1.1 | 2.2 | 4.3 | 478 | O | Glycine <sup>e</sup> | CIA   |
| 2148a | <i>Veronica armena</i> Boiss.<br>& Huet               | Yes | Plantaginaceae            | E | 16              | 2              | P              | 372   | 0.4 | 0.8 | 1.5 | 478 | O | Glycine <sup>e</sup> | CIA   |
| 2149a | <i>Veronica arvensis</i> L.                           | Yes | Plantaginaceae            | E | 18 <sup>o</sup> | 2              | A              | 323   | 0.3 | 0.7 | 1.3 | 478 | O | Glycine <sup>e</sup> | CIA   |
| 2150a | <i>Veronica baumgartenii</i><br>Roem. & Schult.       | Yes | Plantaginaceae            | E | 14 <sup>o</sup> | 2              | P              | 489   | 0.5 | 1.0 | 2.0 | 478 | O | Glycine <sup>e</sup> | CIA   |
| 2151a | <i>Veronica bellidioides</i> L.                       | Yes | Plantaginaceae            | E | 36 <sup>o</sup> | 4              | P              | 1,017 | 1.0 | 2.1 | 4.2 | 478 | O | Glycine <sup>e</sup> | CIA   |
| 2152a | <i>Veronica chamaedrys</i> L.                         | Yes | Plantaginaceae            | E | 32 <sup>o</sup> | 4              | P              | 1,457 | 1.5 | 3.0 | 6.0 | 478 | O | Glycine <sup>e</sup> | CIA   |
| 2153a | <i>Veronica ciliata</i> Fisch.                        | Yes | Plantaginaceae            | E | 16 <sup>o</sup> | 2              | P              | 1,281 | 1.3 | 2.6 | 5.2 | 478 | O | Glycine <sup>e</sup> | CIA   |
| 2154a | <i>Veronica cinerea</i> Boiss.<br>& Balansa           | Yes | Plantaginaceae            | E | 16 <sup>o</sup> | 2              | P              | 313   | 0.3 | 0.6 | 1.3 | 478 | O | Glycine <sup>e</sup> | CIA   |
| 2155a | <i>Veronica copelandii</i><br>Eastw.                  | Yes | Plantaginaceae            | E | 18 <sup>o</sup> | 2              | P              | 812   | 0.8 | 1.7 | 3.3 | 478 | O | Glycine <sup>e</sup> | CIA   |
| 2156a | <i>Veronica crista-galli</i><br>Steven                | Yes | Plantaginaceae            | E | 18              | 2              | A              | 675   | 0.7 | 1.4 | 2.8 | 478 | O | Glycine <sup>e</sup> | CIA   |
| 2157a | <i>Veronica cymbalaria</i><br>Bodard                  | Yes | Plantaginaceae            | E | 36 <sup>o</sup> | 4              | A              | 812   | 0.8 | 1.7 | 3.3 | 478 | O | Glycine <sup>e</sup> | CIA   |
| 2158a | <i>Veronica donii</i> Rapp                            | Yes | Plantaginaceae            | E | 18 <sup>o</sup> | 2              | A              | 734   | 0.8 | 1.5 | 3.0 | 478 | O | Glycine <sup>e</sup> | CIA   |
| 2159a | <i>Veronica filiformis</i> Sm.                        | Yes | Plantaginaceae            | E | 14 <sup>o</sup> | 2              | P              | 352   | 0.4 | 0.7 | 1.4 | 478 | O | Glycine <sup>e</sup> | CIA   |
| 2160a | <i>Veronica gentianoides</i> L.                       | Yes | Plantaginaceae            | E | 48 <sup>o</sup> | 6              | P              | 1,819 | 1.9 | 3.7 | 7.4 | 478 | O | Glycine <sup>e</sup> | CIA   |

Continued

| Entry number <sup>e</sup> | Species                                               | Voucher        | Family                  | Higher group <sup>#</sup> | 2n <sup>‡</sup> | Ploidy level (x) | Life cycle type <sup>§</sup> | DNA amount             |         |         |         | Original ref. <sup>a</sup> | Present amount <sup>†</sup> | Standard species <sup>*b1</sup>  | Method <sup>††</sup> |
|---------------------------|-------------------------------------------------------|----------------|-------------------------|---------------------------|-----------------|------------------|------------------------------|------------------------|---------|---------|---------|----------------------------|-----------------------------|----------------------------------|----------------------|
|                           |                                                       |                |                         |                           |                 |                  |                              | 1C (Mbp <sup>s</sup> ) | 1C (pg) | 2C (pg) | 4C (pg) |                            |                             |                                  |                      |
| 2161a                     | <i>Veronica glauca</i> Sibth. & Sm.                   | Yes            | Plantaginaceae          | E                         | 18°             | 2                | A                            | 391                    | 0.4     | 0.8     | 1.6     | 478                        | O                           | <i>Glycine</i> <sup>e</sup>      | CIA                  |
| 2162a                     | <i>Veronica hederifolia</i> L.                        | Yes            | Plantaginaceae          | E                         | 54°             | 6                | A                            | 1,379                  | 1.4     | 2.8     | 5.6     | 478                        | O                           | <i>Glycine</i> <sup>e</sup>      | CIA                  |
| 2163a                     | <i>Veronica jacquinii</i> Baumg.                      | Yes            | Plantaginaceae          | E                         | 48°             | 6                | P                            | 1,663                  | 1.7     | 3.4     | 6.8     | 478                        | O                           | <i>Glycine</i> <sup>e</sup>      | CIA                  |
| 2164a                     | <i>Veronica kellererii</i> Degen & Urum.              | Yes            | Plantaginaceae          | E                         | 16°             | 2                | P                            | 910                    | 0.9     | 1.9     | 3.7     | 478                        | O                           | <i>Glycine</i> <sup>e</sup>      | CIA                  |
| 2165a                     | <i>Veronica lycica</i> E.B.J.Lehm.                    | Yes            | Plantaginaceae          | E                         | 18°             | 2                | A                            | 430                    | 0.4     | 0.9     | 1.8     | 478                        | O                           | <i>Glycine</i> <sup>e</sup>      | CIA                  |
| 2166a                     | <i>Veronica missurica</i> Raf.                        | Yes            | Plantaginaceae          | E                         | 24°             | 4                | P                            | 1,291                  | 1.3     | 2.6     | 5.3     | 478                        | O                           | <i>Petroselinum</i> <sup>e</sup> | FC:PI                |
| 2167a                     | <i>Veronica multifida</i> L.                          | Yes            | Plantaginaceae          | E                         | 48°             | 6                | P                            | 1,721                  | 1.8     | 3.5     | 7.0     | 478                        | O                           | <i>Glycine</i> <sup>e</sup>      | CIA                  |
| 2168a                     | <i>Veronica nakaiana</i> Ohwi <sup>ad</sup>           | Yes            | Plantaginaceae          | E                         | 34°             | 4                | P                            | 606                    | 0.6     | 1.2     | 2.5     | 478 <sup>ad</sup>          | O                           | <i>Glycine</i> <sup>e</sup>      | CIA                  |
| 2169a                     | <i>Veronica orchidea</i> Crantz                       | Yes            | Plantaginaceae          | E                         | 34°             | 4                | P                            | 782                    | 0.8     | 1.6     | 3.2     | 478                        | O                           | <i>Glycine</i> <sup>e</sup>      | CIA                  |
| 2170a                     | <i>Veronica peregrina</i> L.                          | Yes            | Plantaginaceae          | E                         | 52°             | 6                | A                            | 929                    | 1.0     | 1.9     | 3.8     | 478                        | O                           | <i>Glycine</i> <sup>e</sup>      | CIA                  |
| 2171a                     | <i>Veronica perfoliata</i> R.Br.                      | Yes            | Plantaginaceae          | E                         | 40°             | 4                | P                            | 1,516                  | 1.6     | 3.1     | 6.2     | 478                        | O                           | <i>Petroselinum</i> <sup>e</sup> | FC:PI                |
| 2172a                     | <i>Veronica polita</i> Fr.                            | Yes            | Plantaginaceae          | E                         | 14°             | 2                | A                            | 411                    | 0.4     | 0.8     | 1.7     | 478                        | O                           | <i>Glycine</i> <sup>e</sup>      | CIA                  |
| 2173a                     | <i>Veronica serpyllifolia</i> L.                      | Yes            | Plantaginaceae          | E                         | 14°             | 2                | P                            | 430                    | 0.4     | 0.9     | 1.8     | 478                        | O                           | <i>Glycine</i> <sup>e</sup>      | CIA                  |
| 2174a                     | <i>Veronica syriaca</i> Roem. & Schult.               | Yes            | Plantaginaceae          | E                         | 14°             | 2                | A                            | 685                    | 0.7     | 1.4     | 2.8     | 478                        | O                           | <i>Glycine</i> <sup>e</sup>      | CIA                  |
| 2175a                     | <i>Veronica teucrium</i> L.                           | Yes            | Plantaginaceae          | E                         | 64°             | 8                | P                            | 2,210                  | 2.3     | 4.5     | 9.0     | 478                        | O                           | <i>Glycine</i> <sup>e</sup>      | CIA                  |
| 2176a                     | <i>Veronica triloba</i> Opiz                          | Yes            | Plantaginaceae          | E                         | 18°             | 2                | A                            | 597                    | 0.6     | 1.2     | 2.4     | 478                        | O                           | <i>Glycine</i> <sup>e</sup>      | CIA                  |
| 2177a                     | <i>Veronica triphylos</i> L.                          | Yes            | Plantaginaceae          | E                         | 14°             | 2                | A                            | 694                    | 0.7     | 1.4     | 2.8     | 478                        | O                           | <i>Glycine</i> <sup>e</sup>      | CIA                  |
| 2178a                     | <i>Veronica urticifolia</i> Jacq.                     | Yes            | Plantaginaceae          | E                         | 18°             | 2                | P                            | 626                    | 0.6     | 1.3     | 2.6     | 478                        | O                           | <i>Glycine</i> <sup>e</sup>      | CIA                  |
| 2179a                     | <i>Veronica vendetadeae</i> Albach <sup>ad</sup>      | Yes            | Plantaginaceae          | E                         | 16°             | 2                | P                            | 626                    | 0.6     | 1.3     | 2.6     | 478 <sup>ad</sup>          | O                           | <i>Glycine</i> <sup>e</sup>      | CIA                  |
| 2180a                     | <i>Veronica verna</i> L.                              | Yes            | Plantaginaceae          | E                         | 16°             | 2                | A                            | 528                    | 0.5     | 1.1     | 2.2     | 478                        | O                           | <i>Glycine</i> <sup>e</sup>      | CIA                  |
| 2181a                     | <i>Veronica vindobonensis</i> (M.A.Fisch.) M.A.Fisch. | Yes            | Plantaginaceae          | E                         | 16°             | 2                | P                            | 880                    | 0.9     | 1.8     | 3.6     | 478                        | O                           | <i>Glycine</i> <sup>e</sup>      | CIA                  |
| 2182a                     | <i>Veronicastrum virginicum</i> (L.) Farw.            | Yes            | Plantaginaceae          | E                         | 34°             | 4                | P                            | 1,281                  | 1.3     | 2.6     | 5.2     | 478                        | O                           | <i>Glycine</i> <sup>e</sup>      | CIA                  |
| 2183a                     | <i>Vicia cirrhosa</i> C.Sm. ex Webb & Berthel.        | – <sup>m</sup> | Fabaceae <sup>j</sup>   | E                         | 14°             | 2                | A                            | 2,822                  | 2.9     | 5.8     | 11.5    | 552                        | O                           | G <sup>c</sup>                   | FC:PI                |
| 2184v                     | <i>Vicia faba</i> L.                                  | Yes            | Fabaceae <sup>j</sup>   | E                         | – <sup>n</sup>  | – <sup>p</sup>   | A                            | 12,817                 | 13.1    | 26.2    | 52.4    | 492                        | O                           | G <sup>c</sup>                   | FC:PI                |
| 2185a                     | <i>Vicia scandens</i> R.P.Murray                      | – <sup>m</sup> | Fabaceae <sup>j</sup>   | E                         | 14°             | 2                | P                            | 2,841                  | 2.9     | 5.8     | 11.6    | 552                        | O                           | G <sup>c</sup>                   | FC:PI                |
| 2186a                     | <i>Vieraea laevigata</i> (Brouss. ex Willd.) Webb     | – <sup>m</sup> | Asteraceae <sup>j</sup> | E                         | 16°             | 2                | P                            | 831                    | 0.9     | 1.7     | 3.4     | 552                        | O                           | <i>Solan.</i> <sup>c</sup>       | FC:PI                |
| 2187a                     | <i>Vinca difformis</i> Pourret <sup>am</sup>          | Yes            | Apocynaceae             | E                         | 46              | – <sup>p</sup>   | P                            | 1,159                  | 1.2     | 2.4     | 4.7     | 530 <sup>am</sup>          | O                           | G <sup>c</sup>                   | CIA                  |
| 2188a                     | <i>Vinca herbacea</i> Waldst. & Kit. <sup>am</sup>    | Yes            | Apocynaceae             | E                         | 46              | – <sup>p</sup>   | P                            | 880                    | 0.9     | 1.8     | 3.6     | 530 <sup>am</sup>          | O                           | G <sup>c</sup>                   | CIA                  |
| 2189b                     | <i>Vinca major</i> L. <sup>i, am</sup>                | Yes            | Apocynaceae             | E                         | 90              | – <sup>p</sup>   | P                            | 1,819                  | 1.9     | 3.7     | 7.4     | 530 <sup>am</sup>          | O                           | G <sup>c</sup>                   | CIA                  |
| 2189c                     | <i>Vinca major</i> L. <sup>i, am</sup>                | Yes            | Apocynaceae             | E                         | 90              | – <sup>p</sup>   | P                            | 2,000                  | 2.0     | 4.1     | 8.2     | 530 <sup>am</sup>          | O                           | G <sup>c</sup>                   | CIA                  |
| 2190a                     | <i>Vinca minor</i> L. <sup>am</sup>                   | Yes            | Apocynaceae             | E                         | 46              | – <sup>p</sup>   | P                            | 738                    | 0.8     | 1.5     | 3.0     | 530 <sup>am</sup>          | O                           | G <sup>c</sup>                   | CIA                  |
| 2191a                     | <i>Vinca rosea</i> L. <sup>am</sup>                   | Yes            | Apocynaceae             | E                         | 16              | – <sup>p</sup>   | P                            | 724                    | 0.7     | 1.5     | 3.0     | 530 <sup>am</sup>          | O                           | G <sup>c</sup>                   | CIA                  |
| 2192a                     | <i>Viola anagae</i> Gilli                             | – <sup>m</sup> | Violaceae               | E                         | – <sup>n</sup>  | – <sup>p</sup>   | P                            | 1,276                  | 1.3     | 2.6     | 5.2     | 552                        | O                           | <i>Solan.</i> <sup>c</sup>       | FC:PI                |
| 2193e                     | <i>Viscum album</i> L.                                | No             | Loranthaceae            | E                         | 20°             | 2                | P                            | 100,636                | 102.9   | 205.8   | 411.6   | 616                        | O                           | <i>Haem.</i> <sup>c</sup>        | FC:PI                |

|        |                                                                        |                |                           |   |                |                |   |        |      |       |       |                   |   |                        |       |
|--------|------------------------------------------------------------------------|----------------|---------------------------|---|----------------|----------------|---|--------|------|-------|-------|-------------------|---|------------------------|-------|
| 2194a  | <i>Viscum crassulae</i> Eckl. & Zeyh.                                  | No             | Loranthaceae              | E | 24°            | 2              | P | 80,196 | 82.0 | 164.0 | 328.0 | 616               | O | Haem. <sup>c</sup>     | FC:PI |
| 2195b  | <i>Viscum cruciatum</i> Sieber ex Spreng.                              | No             | Loranthaceae              | E | 20°            | 2              | P | 85,966 | 87.9 | 175.8 | 351.6 | 616               | O | Haem. <sup>c</sup>     | FC:PI |
| 2196a  | <i>Viscum minimum</i> Harv.                                            | No             | Loranthaceae              | E | 28°            | 2              | P | 60,929 | 62.3 | 124.6 | 249.2 | 616               | O | Haem. <sup>c</sup>     | FC:PI |
| 2197d  | <i>Vitis vinifera</i> L.                                               | No             | Vitaceae                  | E | – <sup>n</sup> | – <sup>p</sup> | P | 582    | 0.6  | 1.2   | 2.4   | 563               | O | Solan. <sup>c</sup>    | FC:PI |
| 2197e  | <i>Vitis vinifera</i> L. cv. Cabernet Sauvignon <sup>i</sup>           | No             | Vitaceae                  | E | 38°            | 2              | P | 616    | 0.6  | 1.3   | 2.5   | 589               | O | Solan. <sup>c</sup>    | FC:PI |
| 2198a  | <i>Volutaria canariensis</i> Wagenitz                                  | – <sup>m</sup> | Asteraceae <sup>j</sup>   | E | 32°            | 4              | A | 782    | 0.8  | 1.6   | 3.2   | 477               | O | Solan. <sup>c</sup>    | FC:PI |
| 2199a  | <i>Vulpia bromoides</i> (L.) S.F.Gray                                  | – <sup>m</sup> | Poaceae <sup>j</sup>      | M | 14°            | 2              | P | 2,866  | 2.9  | 5.9   | 11.7  | 555               | O | G <sup>c</sup>         | FC:PI |
| 2200a  | <i>Vulpia ciliata</i> Dumort.                                          | – <sup>m</sup> | Poaceae <sup>j</sup>      | M | 28°            | 4              | P | 4,053  | 4.1  | 8.3   | 16.6  | 555               | O | G <sup>c</sup>         | FC:PI |
| 2201a  | <i>Vulpia myuros</i> (L.) C.C.Gmel. <sup>i</sup>                       | – <sup>m</sup> | Poaceae <sup>j</sup>      | M | 42°            | 6              | P | 6,738  | 6.9  | 13.8  | 27.6  | 555               | O | G <sup>c</sup>         | FC:PI |
| 2201a  | <i>Vulpia sicula</i> (C.Presl) Link                                    | – <sup>m</sup> | Poaceae <sup>j</sup>      | M | 14°            | 2              | P | 2,885  | 2.9  | 5.9   | 11.8  | 555               | O | G <sup>c</sup>         | FC:PI |
| 2202a  | <i>Wahlenbergia lobelioides</i> (L.f.) A.DC. subsp. <i>lobelioides</i> | – <sup>m</sup> | Campanulaceae             | E | 18°            | 2              | A | 323    | 0.3  | 0.7   | 1.3   | 552               | O | Raphanus <sup>c</sup>  | FC:PI |
| 2203a  | <i>Woodfordia fruticosa</i> (L.) Kurz                                  | No             | Lythraceae                | E | 16°            | 2              | P | 692    | 0.7  | 1.4   | 2.8   | 501 <sup>ag</sup> | O | B <sup>c</sup>         | Fe    |
| 2204a  | <i>Wulfenia carinthiaca</i> Jacq.                                      | Yes            | Plantaginaceae            | E | 18°            | 2              | P | 1,320  | 1.4  | 2.7   | 5.4   | 478               | O | Glycine <sup>e</sup>   | CIA   |
| 2205a  | <i>Xeranthemum annuum</i> L.                                           | Yes            | Asteraceae <sup>j</sup>   | E | 12             | 2              | A | 1,046  | 1.1  | 2.1   | 4.3   | 502               | O | Petunia <sup>e</sup>   | FC:PI |
| 2206a  | <i>Xeranthemum cylindraceum</i> Sibth. & Sm.                           | No             | Asteraceae <sup>j</sup>   | E | 20             | 2              | A | 1,863  | 1.9  | 3.8   | 7.6   | 502               | O | Petunia <sup>e</sup>   | FC:PI |
| 2207a  | <i>Xeranthemum inapertum</i> (L.) Mill.                                | Yes            | Asteraceae <sup>j</sup>   | E | 28             | 2              | A | 2,171  | 2.2  | 4.4   | 8.9   | 502               | O | Petunia <sup>e</sup>   | FC:PI |
| 2208a  | <i>Xeranthemum longepapposum</i> Fisch. & C.A.Mey.                     | Yes            | Asteraceae <sup>j</sup>   | E | 14             | 2              | A | 2,866  | 2.9  | 5.9   | 11.7  | 502               | O | Petunia <sup>e</sup>   | FC:PI |
| 2209a  | <i>Xolantha guttata</i> (L.) Raf.                                      | Yes            | Cistaceae                 | E | 36             | 6              | A | 3,570  | 3.7  | 7.3   | 14.6  | 567               | O | Solan. <sup>c</sup>    | FC:PI |
| 2210a  | <i>Xolantha guttata</i> (L.) Raf.                                      | Yes            | Cistaceae                 | E | 48             | 8              | A | 4,401  | 4.5  | 9.0   | 18.0  | 567               | O | Solan. <sup>c</sup>    | FC:PI |
| 2211a  | <i>Xolantha tuberaria</i> (L.) Gallego, Muñoz Garm. & Navarro          | Yes            | Cistaceae                 | E | 14             | 2              | P | 1,633  | 1.7  | 3.3   | 6.7   | 567               | O | Solan. <sup>c</sup>    | FC:PI |
| 2212b  | <i>Yucca glauca</i> Nuttall                                            | No             | Asparagaceae <sup>k</sup> | M | 60°            | – <sup>p</sup> | P | 2,592  | 2.7  | 5.3   | 10.6  | 482               | O | Agave sp. <sup>e</sup> | FC:PI |
| 2213cb | <i>Zea mays</i> L.                                                     | Yes            | Poaceae <sup>j</sup>      | M | – <sup>n</sup> | – <sup>p</sup> | A | 2,895  | 3.0  | 5.9   | 11.8  | 492               | O | Glycine <sup>e</sup>   | FC:PI |
| 2214b  | <i>Zingeria biebersteiniana</i> (Claus) P.A.Smirn.                     | Yes            | Poaceae <sup>j</sup>      | M | 4              | 2              | A | 1,712  | 1.8  | 3.5   | 7.0   | 515               | O | Glycine <sup>e</sup>   | FC:PI |
| 2214c  | <i>Zingeria biebersteiniana</i> (Claus) P.A.Smirn.                     | No             | Poaceae <sup>j</sup>      | M | – <sup>n</sup> | – <sup>p</sup> | A | 1,806  | 1.8  | 3.7   | 7.4   | 518               | O | Glycine <sup>e</sup>   | FC:PI |
| 2215a  | <i>Zingeria trichopoda</i> (Boiss.) P.A.Smirn.                         | Yes            | Poaceae <sup>j</sup>      | M | 8              | 4              | A | 2,592  | 2.7  | 5.3   | 10.6  | 515               | O | Glycine <sup>e</sup>   | FC:PI |
| 2216b  | <i>Zostera marina</i> L.                                               | Yes            | Zosteraceae               | M | 12             | 2              | P | 597    | 0.6  | 1.2   | 2.4   | 479               | O | G <sup>c</sup>         | CIA   |
| 2217a  | <i>Zostera noltii</i> Hornem                                           | Yes            | Zosteraceae               | M | 12             | 2              | P | 753    | 0.8  | 1.5   | 3.1   | 479               | O | G <sup>c</sup>         | CIA   |
| 2217b  | <i>Zostera noltii</i> Hornem                                           | Yes            | Zosteraceae               | M | 12             | 2              | P | 460    | 0.5  | 0.9   | 1.9   | 479               | O | Trifolium <sup>e</sup> | FC:PI |
| 2218a  | <i>Zotovia colensoi</i> (Hook.f.) Edgar & Connor                       | Yes            | Poaceae <sup>j</sup>      | M | 48°            | 4              | P | 1,433  | 1.5  | 2.9   | 5.9   | 528               | O | – <sup>w</sup>         | FC:PI |
| 2219a  | <i>Zotovia thomsonii</i> (Petrie) Edgar & Connor                       | Yes            | Poaceae <sup>j</sup>      | M | c. 48°         | 4              | P | 1,340  | 1.4  | 2.7   | 5.5   | 528               | O | – <sup>w</sup>         | FC:PI |

Continued

APPENDIX (continued, the superscript letters refer to notes preceding this table)

| Entry number <sup>‡</sup> | Species                                 | Voucher | Family               | Higher group <sup>#</sup> | 2n <sup>‡</sup> | Ploidy level (x) | Life cycle type <sup>§</sup> | DNA amount             |         |         |         | Original ref. <sup>a</sup> | Present amount <sup>†</sup> | Standard species <sup>*b1</sup> | Method <sup>††</sup> |
|---------------------------|-----------------------------------------|---------|----------------------|---------------------------|-----------------|------------------|------------------------------|------------------------|---------|---------|---------|----------------------------|-----------------------------|---------------------------------|----------------------|
|                           |                                         |         |                      |                           |                 |                  |                              | 1C (Mbp <sup>s</sup> ) | 1C (pg) | 2C (pg) | 4C (pg) |                            |                             |                                 |                      |
| 2220a                     | <i>Zoysia minima</i> (Colenso)<br>Zotov | Yes     | Poaceae <sup>j</sup> | M                         | 40              | 4                | P                            | 484                    | 0.5     | 1.0     | 2.0     | 528                        | O                           | – <sup>w</sup>                  | FC:PI                |
| 2220b                     | <i>Zoysia minima</i> (Colenso)<br>Zotov | Yes     | Poaceae <sup>j</sup> | M                         | 40              | 4                | P                            | 636                    | 0.7     | 1.3     | 2.6     | 476                        | O                           | <i>Actinidia</i> <sup>c</sup>   | FC:PI                |
| 2221a                     | <i>Zoysia pauciflora</i> Mez            | Yes     | Poaceae <sup>j</sup> | M                         | 40              | 4                | P                            | 474                    | 0.5     | 1.0     | 1.9     | 528                        | O                           | – <sup>w</sup>                  | FC:PI                |
| 2221b                     | <i>Zoysia pauciflora</i> Mez            | Yes     | Poaceae <sup>j</sup> | M                         | 40              | 4                | P                            | 381                    | 0.4     | 0.8     | 1.6     | 476                        | O                           | <i>Actinidia</i> <sup>c</sup>   | FC:PI                |

‡ Chromosome number.

§ E, ephemeral; A, annual; B, biennial; P, perennial.

† O, original value; C, calibrated value; R recalibrated value.

\* The standard species used to calibrate the present amount (see Table 5 and 7 for abbreviations used).

†† Fe, Feulgen microdensitometry; FC, flow cytometry using either propidium iodide (PI), ethidium bromide (EB) or 4', 6-diamidinophenylindole (DAPI) as the fluorochrome; GS, genome sequencing; CIA, computer image analysis.

# E, eudicot; M, monocot; BA, basal angiosperm.



## Original References for DNA Values

Named references in the 'Notes to the Appendix' are given in the 'Literature cited'. Only numbered references of original sources of species' DNA values in the Appendix (column 13) are given in the Key below.

- 467 Souza MM, Palomino G, Pereira TNS, Pereira MG, Viana AP. 2004. Flow cytometric analysis of genome size variation in some *Passiflora* species. *Hereditas* **141**: 31–38.
- 468 Fridlender A, Brown S, Verlaque R, Crosnier MT, Pech N. 2002. Cytometric determination of genome size in *Colchicum* species (Liliales, Colchicaceae) of the western Mediterranean area. *Plant Cell Reports* **21**: 347–352.
- 469 Walker DJ, Monino I, Gonzalez E, Frayssinet N, Correal E. 2005. Determination of ploidy and nuclear DNA content in populations of *Atriplex halimus* (Chenopodiaceae). *Botanical Journal of the Linnean Society* **147**: 441–448.
- 470 Turpeinen T, Kulmala J, Nevo E. 1999. Genome size variation in *Hordeum spontaneum* populations. *Genome* **42**: 1094–1099.
- 471 Hendrix B, Stewart JM. 2005. Estimation of the nuclear DNA content of *Gossypium* species. *Annals of Botany* **95**: 789–797.
- 472 Bureš P, Wang Y-F, Horová L, Suda J. 2004. Genome size variation in Central European species of *Cirsium* (Compositae) and their natural hybrids. *Annals of Botany* **94**: 353–363.
- 473 Zonneveld BJM, van Jaarsveld EJ. 2005. Taxonomic implications of genome size for all species of the genus *Gasteria* Duval (Aloaceae). *Plant Systematics and Evolution* **251**: 217–227.
- 474 Hörandl E, Greilhuber J. 2002. Diploid and autotetraploid sexuals and their relationships to apomicts in the *Ranunculus cassubicus* group: insights from DNA content and isozyme variation. *Plant Systematics and Evolution* **234**: 85–100.
- 475 Muratovic E, Bogunic F, Šoljan D, Siljak-Yakovlev S. 2005. Does *Lilium bosniacum* merit species rank? A classical and molecular-cytogenetic analysis. *Plant Systematics and Evolution* **252**: 97–109.
- 476 Murray BG, Weir IE, Ferguson AR, de Lange PJ. 2003. Variation in DNA C-value and haploid genome size in New Zealand native grasses. *New Zealand Journal of Botany* **41**: 63–69.
- 477 Suda J, Kyncl T, Freiová R. 2003. Nuclear DNA amounts in Macaronesian angiosperms. *Annals of Botany* **92**: 153–164.
- 478 Albach DC, Greilhuber J. 2004. Genome size variation and evolution in *Veronica*. *Annals of Botany* **94**: 897–911.
- 479 Dolenc Koce J, Vilhar B, Bohanec B, Dermastia M. 2003. Genome size of Adriatic seagrasses. *Aquatic Botany* **77**: 17–25.
- 480 Siljak-Yakovlev S, Peccenini S, Muratovic E, Zoldos V, Robin O, Valles J. 2003. Chromosomal differentiation and genome size in three European mountain *Lilium* species. *Plant Systematics and Evolution* **236**: 165–173.
- 481 Moscone EA, Baranyi M, Ebert I, Greilhuber J, Ehrendorfer F, Hunziker AT. 2003. Analysis of nuclear DNA content in *Capsicum* (Solanaceae) by flow cytometry and Feulgen densitometry. *Annals of Botany* **92**: 21–29.
- 482 Zonneveld BJM. 2003. The systematic value of nuclear DNA content in *Agave* L. and some related genera of the Agavaceae. *Bradleya* **21**: 121–125.
- 483 Zonneveld BJM, Duncan GD. 2003. Taxonomic implications of genome size and pollen colour and vitality for species of *Agapanthus* L'Héritier (Agapanthaceae). *Plant Systematics and Evolution* **241**: 115–123.
- 484 Zonneveld BJM, Grimshaw JM, Davis AP. 2003. The systematic value of nuclear DNA content in *Galanthus*. *Plant Systematics and Evolution* **241**: 89–102.
- 485 Baack EJ, Whitney KD, Rieseberg LH. 2005. Hybridization and genome size evolution: timing and magnitude of nuclear DNA content increases in *Helianthus* homoploid hybrid species. *New Phytologist* **167**: 623–630.
- 486 Galloway LF, Etterson JR. 2005. Population differentiation and hybrid success in *Campanula americana*: geography and genome size. *Journal of Evolutionary Biology* **18**: 81–89.
- 487 Stiefkens L, Bernardello G. 2000. Karyotypes and DNA content in diploid and polyploid *Lycium* (Solanaceae). *Boletín de la Sociedad Argentina de Botánica* **35**: 237–244.
- 488 Mikula A, Olas M, Sliwiska E, Rybczynski JJ. 2008. Cryopreservation by encapsulation of *Gentiana* spp. cell suspensions maintains regrowth, embryogenic competence and DNA content. *CryoLetters* **29**: 409–418.
- 489 Horjales M, Redondo N, Blanco A, Rodríguez MA. 2003. Cantidades de DNA nuclear en árboles y arbustos. *Nova Acta Científica Compostelana (Biología)* **13**: 23–33.
- 490 Pinheiro de Carvalho MAA, Horjales M, Lucas IC, et al. 2000. Determination of genome size by flow cytometry in *Semele* from the island of Madeira. *Boletim da Sociedade Broteriana* **70**: 5–15.
- 491 Jakob SS, Meister A, Blattner FR. 2004. Considerable genome size variation of *Hordeum* species (Poaceae) is linked to phylogeny, life form, ecology, and speciation rates. *Molecular Biology and Evolution* **21**: 860–869.
- 492 Barow M, Meister A. 2003. Endopolyploidy in seed plants is differently correlated to systematics, organ, life strategy and genome size. *Plant Cell and Environment* **26**: 571–584.
- 493 Amsellem L, Chevallier MH, Hossaert-McKey M. 2001. Ploidy level of the invasive weed *Rubus alceifolius* (Rosaceae) in its native range and in areas of introduction. *Plant Systematics and Evolution* **228**: 171–179.
- 494 Schmutz H, Meister A, Horres R, Bachmann K. 2004. Genome size variation among accessions of *Arabidopsis thaliana*. *Annals of Botany* **93**: 317–321.
- 495 Mabuchi T, Kokubun H, Mii M, Ando T. 2005. Nuclear DNA content in the genus *Hepatica* (Ranunculaceae). *Journal of Plant Research* **118**: 37–41.
- 496 Suda J. 2002. New DNA ploidy level in *Empetrum* (Empetraceae) revealed by flow cytometry. *Annales Botanici Fennici* **39**: 133–141.
- 497 Vilhar B, Vidic T, Jogan N, Dermastia M. 2002. Genome size and the nucleolar number as estimators of ploidy level in *Dactylis glomerata* in the Slovenian Alps. *Plant Systematics and Evolution* **234**: 1–13.
- 498 Borchert T, Fuchs J, Winkelmann T, Hohe A. 2007. Variable DNA content of *Cyclamen persicum* regenerated via somatic embryogenesis: rethinking the concept of long-term callus and suspension cultures. *Plant Cell Tissue and Organ Culture* **90**: 255–263.
- 499 Thiem B, Sliwiska E. 2003. Flow cytometric analysis of nuclear DNA content in cloudberry (*Rubus chamaemorus* L.) *in vitro* cultures. *Plant Science* **164**: 129–134.
- 500 Šiško M, Ivancic A, Bohanec B. 2003. Genome size analysis in the genus *Cucurbita* and its use for determination of interspecific hybrids obtained using the embryo-rescue technique. *Plant Science* **165**: 663–669.
- 501 Ohri D, Bhargava A, Chatterjee A. 2004. Nuclear DNA amounts in 112 species of tropical hardwoods – New estimates. *Plant Biology* **6**: 555–561.
- 502 Garnatje T, Valles J, Garcia S, et al. 2004. Genome size in *Echinops* L. and related genera (Asteraceae, Cardueae): karyological, ecological and phylogenetic implications. *Biology of the Cell* **96**: 117–124.

- 503 Bartoš J, Alkhimova O, Doleželová M, De Langhe E, Doležel J. 2005. Nuclear genome size and genomic distribution of ribosomal DNA in *Musa* and *Ensete* (Musaceae): taxonomic implications. *Cytogenetic and Genome Research* **109**: 50–57.
- 504 Chase MW, Hanson L, Albert VA, Whitten WM, Williams NH. 2005. Life history evolution and genome size in subtribe Oncidiinae (Orchidaceae). *Annals of Botany* **95**: 191–199.
- 505 Grundt HH, Obermayer R, Borgen L. 2005. Ploidal levels in the arctic-alpine polyploid *Draba lactea* (Brassicaceae) and its low-ploid relatives. *Botanical Journal of the Linnean Society* **147**: 333–347.
- 506 Pinto G, Loureiro J, Lopes T, Santos C. 2004. Analysis of the genetic stability of *Eucalyptus globulus* Labill. somatic embryos by flow cytometry. *Theoretical and Applied Genetics* **109**: 580–587.
- 507 Chiche J, Brown SC, Leclerc JC, Siljak-Yakovlev S. 2003. Genome size, heterochromatin organisation, and ribosomal gene mapping in four species of *Ribes*. *Canadian Journal of Botany* **81**: 1049–1057.
- 508 Dart S, Kron P, Mable BK. 2004. Characterizing polyploidy in *Arabidopsis lyrata* using chromosome counts and flow cytometry. *Canadian Journal of Botany* **82**: 185–197.
- 509 Johnston JS, Pepper AE, Hall AE, et al. 2005. Evolution of genome size in Brassicaceae. *Annals of Botany* **95**: 229–235.
- 510 Pires JC, Lim KY, Kovarik A, et al. 2004. Molecular cytogenetic analysis of recently evolved *Tragopogon* (Asteraceae) allopolyploids reveals a karyotype that is additive of the diploid progenitors. *American Journal of Botany* **91**: 1022–1035.
- 511 Price HJ, Dillon SL, Hodnett G, Rooney WL, Ross L, Johnston JS. 2005. Genome evolution in the genus *Sorghum* (Poaceae). *Annals of Botany* **95**: 219–228.
- 512 Kuta E, Bohanec B, Dubas E, Vizintin L, Przywara L. 2004. Chromosome and nuclear DNA study on *Luzula* – a genus with holokinetic chromosomes. *Genome* **47**: 246–256.
- 513 Walker DJ, Monino I, Correal E. 2006. Genome size in *Bituminaria bituminosa* (L.) C.H. Stirton (Fabaceae) populations: separation of “true” differences from environmental effects on DNA determination. *Environmental and Experimental Botany* **159**: 104–116.
- 514 Závěsly L, Jarolimova V, Stepanek J. 2005. Nuclear DNA content variation within the genus *Taraxacum* (Asteraceae). *Folia Geobotanica* **40**: 91–104.
- 515 Kotseruba V, Gernand D, Meister A, Houben A. 2003. Uniparental loss of ribosomal DNA in the allotetraploid grass *Zingeria trichopoda* ( $2n = 8$ ). *Genome* **46**: 156–163.
- 516 Grattapaglia D, Bradshaw HD. 1994. Nuclear DNA content of commercially important *Eucalyptus* species and hybrids. *Canadian Journal of Forest Research* **24**: 1074–1078.
- 517 Aagaard SMD, Sastad SM, Greilhuber J, Moen A. 2005. A secondary hybrid zone between diploid *Dactylorhiza incarnata* subsp. *cruenta* and allotetraploid *D. lapponica* (Orchidaceae). *Heredity* **94**: 488–496.
- 518 Houben A, Demidov D, Gernand D, Meister A, Leach CR, Schubert I. 2003. Methylation of histone H3 in euchromatin of plant chromosomes depends on basic nuclear DNA content. *Plant Journal* **33**: 967–973.
- 519 Ozkan H, Tuna M, Arumuganathan K. 2003. Nonadditive changes in genome size during allopolyploidization in the wheat (*Aegilops-Triticum*) group. *Journal of Heredity* **94**: 260–264.
- 520 Naganowska B, Wolko B, Sliwinska E, Kaczmarek Z. 2003. Nuclear DNA content variation and species relationships in the genus *Lupinus* (Fabaceae). *Annals of Botany* **92**: 349–355.
- 521 Garcia S, Sanz M, Garnatje T, Kreitschitz A, McArthur ED, Valles J. 2004. Variation of DNA amount in 47 populations of the subtribe Artemisiinae and related taxa (Asteraceae, Anthemideae): karyological, ecological, and systematic implications. *Genome* **47**: 1004–1014.
- 522 Peer WA, Mamoudian M, Lahner B, Reeves RD, Murphy AS, Salt DE. 2003. Identifying model metal hyperaccumulating plants: germplasm analysis of 20 Brassicaceae accessions from a wide geographical area. *New Phytologist* **159**: 421–430.
- 523 Baack EJ. 2004. Cytotype segregation on regional and microgeographic scales in snow buttercups (*Ranunculus adoneus*: Ranunculaceae). *American Journal of Botany* **91**: 1783–1788.
- 524 Naganowska B, Wolko B, Sliwinska E, Kaczmarek Z, Schifino-Wittmann M. 2006. 2C DNA variation and relationships among New World species of the genus *Lupinus* (Fabaceae). *Plant Systematics and Evolution* **256**: 147–157.
- 525 Garcia S, Inceer H, Garnatje T, Valles J. 2005. Genome size variation in some representatives of the genus *Tripleurospermum*. *Biologia Plantarum* **49**: 381–387.
- 526 Morgan HD, Westoby M. 2005. The relationship between nuclear DNA content and leaf strategy in seed plants. *Annals of Botany* **96**: 1321–1330.
- 527 Talent N, Dickinson TA. 2005. Polyploidy in *Crataegus* and *Mespilus* (Rosaceae, Maloideae): evolutionary inferences from flow cytometry of nuclear DNA amounts. *Canadian Journal of Botany* **83**: 1268–1304.
- 528 Murray BG, De Lange PJ, Ferguson AR. 2005. Nuclear DNA variation, chromosome numbers and polyploidy in the endemic and indigenous grass flora of New Zealand. *Annals of Botany* **96**: 1293–1305.
- 529 Bancheva S, Greilhuber J. 2006. Genome size in Bulgarian *Centaurea* s.l. (Asteraceae). *Plant Systematics and Evolution* **257**: 95–117.
- 530 Obermayer R, Greilhuber J. 2006. Cryptopolyploidy revisited: the case of *Vinca* (Apocynaceae). *Plant Systematics and Evolution* **256**: 201–208.
- 531 Weiss-Schneeweiss H, Greilhuber J, Schneeweiss GM. 2005. Genome size evolution in holoparasitic *Orobanchae* (Orobanchaceae) and related genera. *American Journal of Botany* **93**: 148–156.
- 532 Zonneveld BJM, Duncan GD. 2006. Genome size for the species of *Nerine* Herb. (Amaryllidaceae) and its evident correlation with growth cycle, leaf width and other morphological characters. *Plant Systematics and Evolution* **257**: 251–260.
- 533 Pecinka A, Suchankova P, Lysak MA, Travnicek B, Doležel J. 2006. Nuclear DNA content variation among central European *Koeleria* taxa. *Annals of Botany* **98**: 117–122.
- 534 Vizintin L, Javornik B, Bohanec B. 2006. Genetic characterization of selected *Trifolium* species as revealed by nuclear DNA content and ITS rDNA region analysis. *Plant Science* **170**: 859–866.
- 535 Greilhuber J, Borsch T, Müller K, Worberg A, Porembski S, Barthlott W. 2006. Smallest angiosperm genomes found in Lentibulariaceae with chromosomes of bacterial size. *Plant Biology* **8**: 770–777.
- 536 Garnatje T, Garcia S, Vilatersana R, Valles J. 2006. Genome size variation in the genus *Carthamus* (Asteraceae, Cardueae): systematic implications and additive changes during allopolyploidization. *Annals of Botany* **97**: 461–467.
- 537 Lihová J, Shimizu KK, Marhold K. 2006. Allopolyploid origin of *Cardamine asarifolia* (Brassicaceae): incongruence between plastid and nuclear ribosomal DNA sequences solved by a single-copy nuclear gene. *Molecular Phylogenetics and Evolution* **39**: 759–786.
- 538 Dansi A, Sainou O, Agbangla C, Ahanhanzo C, Brown S, Adoukonou-Sagbadja H. 2005. Ploidy level and nuclear DNA content of some accessions of water yam (*Dioscorea alata*) collected at Savè, a district of central Benin. *Plant Genetic Resources Newsletter* **144**: 20–23.
- 539 Lafuma L, Balkwill K, Imbert E, Verlaque R, Maurice S. 2003. Ploidy level and origin of the European invasive weed *Senecio inaequidens* (Asteraceae). *Plant Systematics and Evolution* **243**: 59–72.
- 540 Peer WA, Mahmoudian M, Freeman JL, et al. 2006. Assessment of plants from the Brassicaceae family as genetic models for the study of nickel and zinc hyperaccumulation. *New Phytologist* **172**: 248–260.

- 541 Schönswetter P, Suda J, Popp M, Weiss-Schneeweiss H, Brochmann C. 2007. Circumpolar phylogeography of *Juncus biglumis* (Juncaceae) inferred from AFLP fingerprints, cpDNA sequences, nuclear DNA content and chromosome numbers. *Molecular Phylogenetics and Evolution* 42: 92–103.
- 542 Kula A, Dudziak B, Sliwinska E, et al. 2006. Cytomorphological studies on American and European *Phleum commutatum* Gaud. (Poaceae). *Acta Biologica Cracoviensia Series Botanica* 48: 99–108.
- 543 Grabowska-Joachimiak A, Sliwinska E, Pigula M, Joachimiak A. 2006. Genome size in *Humulus lupulus* L. and *H. japonicus* Siebold & Zucc. (Cannabaceae). *Acta Societatis Botanicorum Poloniae* 75: 207–214.
- 544 Obbard DJ, Harris SA, Buggs RJA, Pannell JR. 2006. Hybridization, polyploidy and the evolution of sexual systems in *Mercurialis* (Euphorbiaceae). *Evolution* 60: 1801–1815.
- 545 Ammiraju JSS, Luo MZ, Goicoechea JL, et al. 2006. The *Oryza* bacterial artificial chromosome library resource: construction and analysis of 12 deep-coverage large-insert BAC libraries that represent the 10 genome types of the genus *Oryza*. *Genome Research* 16: 140–147.
- 546 Kochjarová J, Valachovic M, Bureš P, Mráz P. 2006. The genus *Cochlearia* L. (Brassicaceae) in the Eastern Carpathians and adjacent area. *Botanical Journal of the Linnean Society* 151: 355–364.
- 547 Sandoval A, Hoher V, Verdeil JL. 2003. Flow cytometric analysis of the cell cycle in different coconut palm (*Cocos nucifera* L.) tissues cultured *in vitro*. *Plant Cell Reports* 22: 25–31.
- 548 Rival A, Beule T, Barre P, Hamon S, Duval Y, Noirot M. 1997. Comparative flow cytometric estimation of nuclear DNA content in oil palm (*Elaeis guineensis* Jacq.) tissue cultures and seed-derived plants. *Plant Cell Reports* 16: 884–887.
- 549 Maksimovic M, Vidic D, Miloš M, Edita Solic M, Abadžić S, Siljak-Yakovlev S. 2007. Effect of the environmental conditions on essential oil profile in two Dinaric *Salvia* species: *S. brachyodon* Vandas and *S. officinalis* L. *Biochemical Systematics and Ecology* 35: 473–478.
- 550 Castro S, Loureiro J, Rodriguez E, Silveira P, Navarro L, Santos C. 2007. Evaluation of polysomaty and estimation of genome size in *Polygala vayredae* and *P. calcarea* using flow cytometry. *Plant Science* 172: 1131–1137.
- 551 Kentner EK, Arnold ML, Wessler SR. 2003. Characterization of high-copy-number retrotransposons from the large genomes of the Louisiana iris species and their use as molecular markers. *Genetics* 164: 685–697.
- 552 Suda J, Kynel T, Jarolimova V. 2005. Genome size variation in Macaronesian angiosperms: forty percent of the Canarian endemic flora completed. *Plant Systematics and Evolution* 252: 215–238.
- 553 Pellicer J, Garcia S, Garnatje T, Dariiama S, Korobkov A, Valles J. 2007. Chromosome numbers in some *Artemisia* (Asteraceae, Anthemideae) species and genome size variation in its subgenus *Dracunculus*: karyological, systematic and phylogenetic implications. *Chromosome Botany* 2: 45–53.
- 554 Barow M, Meister A. 2002. Lack of correlation between AT frequency and genome size in higher plants and the effect of nonrandomness of base sequences on dye binding. *Cytometry* 47: 1–7.
- 555 Šmarda P, Bureš P, Horová L, Foggí B, Rossi G. 2008. Genome size and GC content evolution of *Festuca*: ancestral expansion and subsequent reduction. *Annals of Botany* 101: 421–433.
- 556 Adoukonou-Sagbadja H, Schubert V, Dansi A, et al. 2007. Flow cytometric analysis reveals different nuclear DNA contents in cultivated Fonio (*Digitaria* spp.) and some wild relatives from West-Africa. *Plant Systematics and Evolution* 267: 163–176.
- 557 Negron-Ortiz V. 2007. Chromosome numbers, nuclear DNA content, and polyploidy in *Consouea* (Cactaceae), an endemic cactus of the Caribbean islands. *American Journal of Botany* 94: 1360–1370.
- 558 Panda KK, Panigrahy K, Das AB, Panda BB. 2007. Analyses of chromosome number, nuclear DNA content and RAPD profile in three morphotypes of *Pandanus fascicularis* Lam. *Plant Genetic Resources Newsletter* 152: 12–22.
- 559 Stehlik I, Kron P, Barrett SCH, Husband BC. 2007. Sexing pollen reveals female bias in a dioecious plant. *New Phytologist* 175: 185–194.
- 560 Noirot M, Poncet V, Barre P, Hamon P, Hamon S, De Kochko A. 2003. Genome size variations in diploid African *Coffea* species. *Annals of Botany* 92: 709–714.
- 561 Carvalho CR, Clarindo WR, Praca MM, Araujo FS, Carels N. 2008. Genome size, base composition and karyotype of *Jatropha curcas* L., an important biofuel plant. *Plant Science* 174: 613–617.
- 562 Leong-Škornicková J, Šída O, Jarolímová V, et al. 2007. Chromosome numbers and genome size variation in Indian species of *Curcuma* (Zingiberaceae). *Annals of Botany* 100: 505–526.
- 563 Loureiro J, Rodriguez E, Doležel J, Santos C. 2007. Two new nuclear isolation buffers for plant DNA flow cytometry: a test with 37 species. *Annals of Botany* 100: 875–888.
- 564 Tatum TC, Nunez L, Kushad MM, Rayburn AL. 2006. Genome size variation in pumpkin (*Cucurbita* sp.). *Annals of Applied Biology* 149: 145–151.
- 565 Leitch IJ, Beaulieu JM, Cheung K, Hanson L, Lysak M, Fay MF. 2007. Punctuated genome size evolution in Liliaceae. *Journal of Evolutionary Biology* 20: 2296–2308.
- 566 Leitch IJ, Hanson L, Lim KY, et al. 2008. The ups and downs of genome size evolution in polyploid species of *Nicotiana* (Solanaceae). *Annals of Botany* 101: 805–814.
- 567 Boscaiu M, Ellul P, Soriano P, Vicente O. 2008. Nuclear DNA content variation in *Halimium* and *Xolantha* (Cistaceae). *Plant Biosystems* 142: 17–23.
- 568 McNeal J, Arumugunathan K, Kuehl J, Boore J, dePamphilis C. 2007. Systematics and plastid genome evolution of the cryptically photosynthetic parasitic plant genus *Cuscuta* (Convolvulaceae). *BMC Biology* 5: 55.
- 569 Suda J, Krahulcová A, Trávníček P, Rosenbaumová R, Peckert T, Krahulec F. 2007. Genome size variation and species relationships in *Hieracium* sub-genus *Pilosella* (Asteraceae) as inferred by flow cytometry. *Annals of Botany* 100: 1323–1335.
- 570 Fujimoto S, Ito M, Matsunaga S, Fukui K. 2005. An upper limit of the ratio of DNA volume to nuclear volume exists in plants. *Genes and Genetic Systems* 80: 345–350.
- 571 Ramírez-Morillo IM, Brown GK. 2001. The origin of the low chromosome number in *Cryptanthus* (Bromeliaceae). *Systematic Botany* 26: 722–726.
- 572 Bacic T, Jogan N, Dolenc Koce J. 2007. *Luzula* sect. *Luzula* in the south-eastern Alps – karyology and genome size. *Taxon* 56: 129–136.
- 573 Blocka-Wandas M, Sliwinska E, Grabowska-Joachimiak A, Musial K, Joachimiak AJ. 2007. Male gametophyte development and two different DNA classes of pollen grains in *Rumex acetosa* L., a plant with an XX/XY1Y2 sex chromosome system and a female-biased sex ratio. *Sexual Plant Reproduction* 20: 171–180.
- 574 Kotseruba V, Pistrick K, Gernand D, Meister A, Ghukasyan A, Gabrielyan I, Houben A. 2005. Characterisation of the low-chromosome number grass *Colpodium versicolor* (Stev.) Schmalh. ( $2n = 4$ ) by molecular cytogenetics. *Caryologia* 58: 241–245.
- 575 Ebert I and Till W (University of Vienna, Austria, pers. comm., 1997).
- 576 Halkka O. 1964. A photometric study of the *Luzula* problem. *Hereditas* 52: 81–88.
- 577 Husband B and Kron P (University of Guelph, Canada, pers. comm., 2008).

- 578 Rossi AAB, Clarindo WR, Carvalho CR, de Oliveira LO. 2008. Karyotype and nuclear DNA content of *Psychotria ipecacuanha*: a medicinal species. *Cytologia* 73: 53–60.
- 579 Lysák MA, Rostková AR, Dixon JM, Rossi G, Doležel J. 2000. Limited genome size variation in *Sesleria albicans*. *Annals of Botany* 86: 399–403.
- 580 Dolenc Koce J, Škondric S, Bacic T, Dermastia M. 2008. Amounts of nuclear DNA in marine halophytes. *Aquatic Botany* 89: 385–389.
- 581 Zonneveld BJM. 2008. The systematic value of nuclear DNA content for all species of *Narcissus* L. (Amaryllidaceae). *Plant Systematics and Evolution* 275: 109–132.
- 582 Loureiro J, Kopecký D, Castro S, Santos C, Silveira P. 2007. Flow cytometric and cytogenetic analyses of Iberian Peninsula *Festuca* spp. *Plant Systematics and Evolution* 269: 89–105.
- 583 Achigan-Dako E, Fuchs J, Ahanchede A, Blattner F. 2008. Flow cytometric analysis in *Lagenaria siceraria* (Cucurbitaceae) indicates correlation of genome size with usage types and growing elevation. *Plant Systematics and Evolution* 276: 9–19.
- 584 Loureiro J, Pinto G, Lopes T, Doležel J, Santos C. 2005. Assessment of ploidy stability of the somatic embryogenesis process in *Quercus suber* L. using flow cytometry. *Planta* 221: 815–822.
- 585 Loureiro J, Rodriguez E, Gomes A, Santos C. 2007. Genome size estimations on *Ulmus minor* Mill., *Ulmus glabra* Huds., and *Celtis australis* L. using flow cytometry. *Plant Biology* 9: 541–544.
- 586 Loureiro J, Rodriguez E, Costa A, Santos C. 2007. Nuclear DNA content estimations in wild olive (*Olea europaea* L. subsp. *europaea* var. *sylvestris* Brot.) and Portuguese cultivars of *O. europaea* using flow cytometry. *Genetic Resources and Crop Evolution* 54: 21–25.
- 587 Loureiro J, Rodriguez E, Doležel J, Santos C. 2006. Comparison of four nuclear isolation buffers for plant DNA flow cytometry. *Annals of Botany* 98: 679–689.
- 588 Brito G, Loureiro J, Lopes T, Rodriguez E, Santos C. 2008. Genetic characterisation of olive trees from Madeira Archipelago using flow cytometry and microsatellite markers. *Genetic Resources and Crop Evolution* 55: 657–664.
- 589 Leal F, Loureiro J, Rodriguez E, Pais MS, Santos C, Pinto-Carnide O. 2006. Nuclear DNA content of *Vitis vinifera* cultivars and ploidy level analyses of somatic embryo-derived plants obtained from anther culture. *Plant Cell Reports* 25: 978–985.
- 590 Castro S, Loureiro J, Santos C, Ater M, Ayensa G, Navarro L. 2007. Distribution of flower morphs, ploidy level and sexual reproduction of the invasive weed *Oxalis pes-caprae* in the western area of the Mediterranean region. *Annals of Botany* 99: 507–517.
- 591 Rosenbaumová R, Placková I, Suda J. 2004. Variation in *Lamium* subg. *Galeobdolon* (Lamiaceae) – insights from ploidy levels, morphology and isozymes. *Plant Systematics and Evolution* 244: 219–244.
- 592 Johnston S (pers. comm., 2009).
- 593 Mahelka V, Suda J, Jarolímová V, Trávníček P, Krahulec F. 2005. Genome size discriminates between closely related taxa *Elytrigia repens* and *E. intermedia* (Poaceae: Triticeae) and their hybrid. *Folia Geobotanica* 40: 367–384.
- 594 Tuna M, Vogel KP, Arumuganathan K. 2006. Cytogenetic and nuclear DNA content characterization of diploid *Bromus erectus* and *Bromus variegatus*. *Crop Science* 46: 637–641.
- 595 Tuna M, Vogel KP, Arumuganathan K. 2005. Genome size and Giemsa C-banded karyotype of tetraploid *Bromus ciliatus* L. *Euphytica* 146: 177–182.
- 596 Kikuchi S, Tanaka H, Shiba T, Mii M, Tsujimoto H. 2006. Genome size, karyotype, meiosis and a novel extra chromosome in *Torenia fournieri*, *T. baillonii* and their hybrid. *Chromosome Research* 14: 665–672.
- 597 Tensch EM, Greilhuber J, Hammett KRW, Murray BG. 2008. Genome size in *Dahlia* Cav. (Asteraceae-Coreopsioideae). *Plant Systematics and Evolution* 276: 157–166.
- 598 Siljak-Yakovlev S, Solic ME, Catrice O, Brown SC, Papes D. 2005. Nuclear DNA content and chromosome number in some diploid and tetraploid *Centaurea* (Asteraceae: Cardueae) from the Dalmatia region. *Plant Biology* 7: 397–404.
- 599 Lysák MA, Koch MA, Beaulieu JM, Meister A, Leitch IJ. 2009. The dynamic ups and downs of genome size evolution in Brassicaceae. *Molecular Biology and Evolution* 26: 85–98.
- 600 Meng RG, Finn C. 2002. Determining ploidy level and nuclear DNA content in *Rubus* by flow cytometry. *Journal of the American Society for Horticultural Science* 127: 767–775.
- 601 Vaughan HE, Taylor S, Parker JS. 1997. The ten cytological races of the *Scilla autumnalis* species complex. *Heredity* 79: 371–379.
- 602 Lysák MA, Cheung K, Kitschke M, Bureš P. 2007. Ancestral chromosomal blocks are triplicated in Brassicaceae species with varying chromosome number and genome size. *Plant Physiology* 145: 402–410.
- 603 Souza MM, Palomino G, Pereira TNS, et al. 2003. Variação interspecífica do tamanho do genoma em *Passiflora* spp. (Passifloraceae). In: *II Congresso Brasileiro de Melhoramento de Plantas 23 a 26 de abril de 2003*. SBMP, Livro eletrônico, 297–302.
- 604 Eilam T, Anikster Y, Millet E, Manisterski J, Feldman M. 2008. Nuclear DNA amount and genome downsizing in natural and synthetic allopolyploids of the genera *Aegilops* and *Triticum*. *Genome* 51: 616–627.
- 605 Eilam T, Anikster Y, Millet E, Manisterski J, Sag-Assif O, Feldman M. 2007. Genome size and genome evolution in diploid Triticeae species. *Genome* 50: 1029–1037.
- 606 Baird WV, Estager AS, Wells JK. 1994. Estimating nuclear DNA content in Peach and related diploid species using laser flow cytometry and DNA hybridization. *Journal of the American Society for Horticultural Science* 119: 1312–1316.
- 607 Price HJ (pers. comm., 1994).
- 608 Doležalová I, Lebeda A, Janeček J, Čihalíková J, Kristková E, Vránova O. 2002. Variation in chromosome numbers and nuclear DNA contents in genetic resources of *Lactuca* L. species (Asteraceae). *Genetic Resources and Crop Evolution* 49: 383–395.
- 609 Huff DR, Palazzo AJ. 1998. Fine fescue species determination by laser flow cytometry. *Crop Science* 38: 445–450.
- 610 Boyko EV, Badaev NS, Maximov NG, Zelenin AV. 1984. Does DNA content change in the course of Triticale breeding. *Cereal Research Communication* 12: 99–100.
- 611 Blondon F, Marie D, Brown S, Kondorosi A. 1994. Genome size and base composition in *Medicago sativa* and *Medicago truncatula* species. *Genome* 37: 264–270.
- 612 Hanson L, Boyd A, Johnson MAT, Bennett MD. 2005. First nuclear DNA C-values for 18 eudicot families. *Annals of Botany* 96: 1315–1320.
- 613 Tuskan GA, DiFazio S, Jansson S, et al. 2006. The genome of black cottonwood, *Populus trichocarpa* (Torr. & Gray). *Science* 313: 1596–1604.
- 614 Paterson AH, Bowers JE, Bruggmann R, et al. 2009. The *Sorghum bicolor* genome and the diversification of grasses. *Nature* 457: 551–556.
- 615 The International Brachypodium Initiative. 2010. Genome sequencing and analysis of the model grass *Brachypodium distachyon*. *Nature* 463: 763–768.
- 616 Zonneveld BJM. 2010. New record holders for maximum genome size in eudicots and monocots. *Journal of Botany* 2010: Article ID 527357. doi:10.1155/2010/527357.
- 617 Pellicer J, Fay MF, Leitch IJ. 2010. The largest eukaryotic genome of them all? *Botanical Journal of the Linnean Society* 164: 10–15.
